# Supplementary material for: GWAS meta-analysis of over 29,000 people with epilepsy identifies 26 risk loci and subtype-specific genetic architecture
Source: Nat Genet. 2023 Aug 31;55(9):1471–82. doi: 10.1038/s41588-023-01485-w (PMC10484785; doi:10.1038/s41588-023-01485-w)
Supplement: Supplementary file 6 — GWGAS results. Analysis of gene-based association score based on the aggregate of all SNPs inside each gene using MAGMA. [file 41588_2023_1485_MOESM6_ESM.xlsx]

## Sheet: All epilepsy
Supplementary Data 3. Genome-wide gene based association study (GWGAS) results. Analysis of gene-based association score based on the aggregate of all SNPs inside each gene using MAGMA.
Column Description 1. EpiType: The epilepsy type in which the association is studied. 2. GENE: the gene ID as specified in the annotation file 3. CHR: the chromosome the gene is on 4. START: the annotation start of the gene on that chromosome (the boundary includes any window around the gene applied during annotation) 5. STOP: the annotation end of the gene 6. NSNPS: the number of SNPs annotated …
EpiType	GENE	CHR	START	STOP	NSNPS	NPARAM	N	ZSTAT	P	SYMBOL
All_epilepsy	ENSG00000028116	2	58134786	58387055	383	34	70304	6.6486	1.4796e-11	VRK2
All_epilepsy	ENSG00000144285	2	166845670	166984523	362	33	67531	6.5552	2.7776e-11	SCN1A
All_epilepsy	ENSG00000120049	10	103585731	103603677	19	5	70290	5.0934	1.7584e-07	KCNIP2
All_epilepsy	ENSG00000123607	2	166713985	166810353	187	21	64484	5.0084	2.7437e-07	TTC21B
All_epilepsy	ENSG00000165118	9	86553226	86571901	20	4	70702	4.7117	1.2283e-06	C9orf64
All_epilepsy	ENSG00000176148	11	33060963	33127489	197	11	70580	4.5805	2.3191e-06	TCP11L1
All_epilepsy	ENSG00000120029	10	103605356	103815950	187	19	69680	4.4523	4.2468e-06	C10orf76
All_epilepsy	ENSG00000165119	9	86582998	86595569	13	4	70759	4.4523	4.2485e-06	HNRNPK
All_epilepsy	ENSG00000187391	7	77646393	79082890	3698	301	69958	4.4363	4.5763e-06	MAGI2
All_epilepsy	ENSG00000171634	17	65821640	65980494	136	5	70828	4.431	4.6889e-06	BPTF
All_epilepsy	ENSG00000121690	11	33037410	33055128	48	3	70648	4.3812	5.9024e-06	DEPDC7
All_epilepsy	ENSG00000172680	8	57025501	57026541	2	1	67012	4.3637	6.3935e-06	MOS
All_epilepsy	ENSG00000178206	2	132044330	132050127	1	1	69524	4.3188	7.844e-06	CYP4F31P
All_epilepsy	ENSG00000108788	17	40719086	40725257	3	1	70390	4.262	1.0132e-05	MLX
All_epilepsy	ENSG00000178966	9	86595626	86618985	24	3	70736	4.1925	1.3793e-05	RMI1
All_epilepsy	ENSG00000131149	16	85645015	85709810	3	1	69191	4.1803	1.4557e-05	GSE1
All_epilepsy	ENSG00000089154	12	120565007	120632513	54	3	70048	4.1525	1.6442e-05	GCN1L1
All_epilepsy	ENSG00000156265	21	30449792	30548210	280	24	68570	4.0886	2.1701e-05	MAP3K7CL
All_epilepsy	ENSG00000196366	9	139377947	139380518	1	1	70716	4.0514	2.546e-05	C9orf163
All_epilepsy	ENSG00000115392	2	58386378	58468507	135	19	70135	4.0113	3.0193e-05	FANCL
All_epilepsy	ENSG00000171735	1	6845384	7829766	1502	183	69557	4.0008	3.157e-05	CAMTA1
All_epilepsy	ENSG00000101057	20	42295754	42345136	87	8	68644	3.9716	3.5693e-05	MYBL2
All_epilepsy	ENSG00000198408	10	103544200	103578696	34	7	69769	3.9602	3.7441e-05	MGEA5
All_epilepsy	ENSG00000068120	17	40713485	40718295	1	1	69029	3.9559	3.813e-05	COASY
All_epilepsy	ENSG00000089157	12	120634489	120639038	3	1	68931	3.9353	4.1548e-05	RPLP0
All_epilepsy	ENSG00000140526	15	89630690	89745591	142	16	69677	3.9206	4.4171e-05	ABHD2
All_epilepsy	ENSG00000152377	5	136310987	136934068	1288	108	69343	3.9183	4.4591e-05	SPOCK1
All_epilepsy	ENSG00000049246	1	7844380	7905237	166	19	69303	3.8981	4.8479e-05	PER3
All_epilepsy	ENSG00000107833	10	103541082	103543170	3	1	69136	3.8755	5.3211e-05	NPM3
All_epilepsy	ENSG00000173273	8	9413424	9639856	618	24	70550	3.8656	5.5402e-05	TNKS
All_epilepsy	ENSG00000102780	13	42614176	42830714	575	47	70597	3.8534	5.8244e-05	DGKH
All_epilepsy	ENSG00000008988	8	56979854	56987069	18	4	69319	3.8078	7.0104e-05	RPS20
All_epilepsy	ENSG00000255330	6	127759551	127840146	146	18	69761	3.8061	7.0591e-05	SOGA3
All_epilepsy	ENSG00000214338	6	127759551	127840500	146	18	69761	3.8061	7.0591e-05	SOGA3
All_epilepsy	ENSG00000114395	3	50388126	50395891	3	2	67322	3.8025	7.1634e-05	CYB561D2
All_epilepsy	ENSG00000122406	1	93297582	93307481	7	2	70924	3.7899	7.5352e-05	RPL5
All_epilepsy	ENSG00000089159	12	120648250	120703574	42	4	69923	3.768	8.2267e-05	PXN
All_epilepsy	ENSG00000189367	6	127761488	127780536	22	2	70905	3.7645	8.3428e-05	KIAA0408
All_epilepsy	ENSG00000148384	9	139323071	139334274	28	5	66766	3.7595	8.5115e-05	INPP5E
All_epilepsy	ENSG00000102531	13	49550048	49783915	147	6	69484	3.746	8.9831e-05	FNDC3A
All_epilepsy	ENSG00000127554	16	2034208	2037750	7	1	68006	3.746	8.9839e-05	GFER
All_epilepsy	ENSG00000241360	22	38054734	38062941	13	2	70528	3.7306	9.553e-05	PDXP
All_epilepsy	ENSG00000186648	14	24521206	24538937	3	2	68641	3.7202	9.9526e-05	LRRC16B
All_epilepsy	ENSG00000184898	2	152104454	152118393	21	4	70795	3.6973	0.00010895	RBM43
All_epilepsy	ENSG00000176463	15	92396925	92715665	702	93	69204	3.6934	0.00011065	SLCO3A1
All_epilepsy	ENSG00000176953	16	28962128	28978418	2	1	67762	3.6914	0.00011153	NFATC2IP
All_epilepsy	ENSG00000178921	17	8150936	8173809	45	10	67389	3.6847	0.00011448	PFAS
All_epilepsy	ENSG00000214029	12	133694740	133707059	27	5	68312	3.6458	0.00013327	ZNF891
All_epilepsy	ENSG00000181690	8	57073463	57123883	33	2	70177	3.6458	0.0001333	PLAG1
All_epilepsy	ENSG00000080345	2	152266397	152364527	155	15	69381	3.6449	0.00013373	RIF1
All_epilepsy	ENSG00000185658	21	40556102	40693485	282	15	70782	3.6448	0.00013382	BRWD1
All_epilepsy	ENSG00000177455	16	28943260	28950667	2	1	67727	3.6362	0.00013835	CD19
All_epilepsy	ENSG00000127561	16	2039661	2044276	3	1	69385	3.6137	0.00015093	SYNGR3
All_epilepsy	ENSG00000154511	1	93307724	93427057	121	5	71066	3.6129	0.0001514	FAM69A
All_epilepsy	ENSG00000133069	1	205197304	205242471	83	9	70613	3.6007	0.00015866	TMCC2
All_epilepsy	ENSG00000152503	5	114460459	114516243	73	9	69174	3.5961	0.00016153	TRIM36
All_epilepsy	ENSG00000180644	10	72357104	72362531	9	3	70504	3.5915	0.0001644	PRF1
All_epilepsy	ENSG00000236637	9	21186617	21187598	2	1	70318	3.5871	0.00016719	IFNA4
All_epilepsy	ENSG00000139842	13	113862552	113919399	82	2	70643	3.5818	0.00017063	CUL4A
All_epilepsy	ENSG00000172775	16	57186378	57220028	36	7	67731	3.5551	0.00018888	FAM192A
All_epilepsy	ENSG00000196296	16	28889726	28915830	4	1	68644	3.5543	0.00018947	ATP2A1
All_epilepsy	ENSG00000185158	17	30334891	30380523	22	2	67762	3.5503	0.00019236	LRRC37B
All_epilepsy	ENSG00000166913	20	43514317	43537173	23	3	71146	3.542	0.00019853	YWHAB
All_epilepsy	ENSG00000131153	16	85709804	85723679	6	1	67717	3.5336	0.00020496	GINS2
All_epilepsy	ENSG00000170500	2	100889753	100939195	142	12	68667	3.5261	0.00021089	LONRF2
All_epilepsy	ENSG00000169432	2	167051695	167232503	404	49	69622	3.5076	0.00022604	SCN9A
All_epilepsy	ENSG00000197721	1	207818458	207911761	243	19	69295	3.5025	0.00023048	CR1L
All_epilepsy	ENSG00000165091	9	75136717	75451267	770	42	69975	3.4913	0.00024035	TMC1
All_epilepsy	ENSG00000185352	13	96743093	97485671	1311	99	69709	3.4913	0.00024037	HS6ST3
All_epilepsy	ENSG00000151834	4	46250444	46477247	307	19	69587	3.4893	0.00024213	GABRA2
All_epilepsy	ENSG00000185070	14	85996488	86095034	228	34	69488	3.4782	0.00025239	FLRT2
All_epilepsy	ENSG00000091640	17	4862521	4871167	11	4	69841	3.4712	0.00025907	SPAG7
All_epilepsy	ENSG00000102595	13	96453834	96705736	365	23	69132	3.4695	0.0002607	UGGT2
All_epilepsy	ENSG00000008226	3	38080696	38165516	132	11	69891	3.462	0.0002681	DLEC1
All_epilepsy	ENSG00000151773	13	44398045	44453827	185	20	68088	3.4525	0.00027768	CCDC122
All_epilepsy	ENSG00000167962	16	2047655	2059824	14	1	68772	3.4469	0.0002835	ZNF598
All_epilepsy	ENSG00000187987	6	28399707	28411279	32	6	69289	3.4388	0.00029217	ZSCAN23
All_epilepsy	ENSG00000164707	7	135365985	135414006	107	14	69502	3.4363	0.00029488	SLC13A4
All_epilepsy	ENSG00000102931	16	57279010	57287516	11	3	67862	3.4137	0.00032039	ARL2BP
All_epilepsy	ENSG00000148396	9	139334549	139372141	39	4	70874	3.4129	0.00032139	SEC16A
All_epilepsy	ENSG00000141127	17	18743398	18834581	219	13	69923	3.4042	0.00033174	PRPSAP2
All_epilepsy	ENSG00000183091	2	152341850	152591001	270	28	69511	3.4006	0.00033619	NEB
All_epilepsy	ENSG00000164124	4	159122756	159176563	24	5	70130	3.393	0.00034567	TMEM144
All_epilepsy	ENSG00000172037	3	49158547	49170551	3	2	67850	3.3862	0.00035438	LAMB2
All_epilepsy	ENSG00000141699	17	40731531	40762641	10	3	67096	3.379	0.00036376	FAM134C
All_epilepsy	ENSG00000124588	6	2988221	3019996	87	14	68062	3.3742	0.0003701	NQO2
All_epilepsy	ENSG00000129250	17	4901243	4931696	59	12	68744	3.3742	0.00037019	KIF1C
All_epilepsy	ENSG00000100427	22	50497820	50524331	102	8	69249	3.3578	0.00039276	MLC1
All_epilepsy	ENSG00000158691	6	28346732	28367511	49	7	70164	3.3573	0.00039355	ZSCAN12
All_epilepsy	ENSG00000183971	16	2059927	2070756	1	1	68235	3.3494	0.000405	NPW
All_epilepsy	ENSG00000156261	21	30428126	30446118	23	6	67062	3.3405	0.00041819	CCT8
All_epilepsy	ENSG00000205268	8	66629745	66754557	188	29	65001	3.3267	0.00043934	PDE7A
All_epilepsy	ENSG00000114646	3	47603729	47622282	12	2	70569	3.3252	0.00044178	CSPG5
All_epilepsy	ENSG00000171931	17	18647326	18682662	27	6	67784	3.3152	0.00045797	FBXW10
All_epilepsy	ENSG00000189298	6	28317691	28336947	52	10	68578	3.3116	0.00046377	ZKSCAN3
All_epilepsy	ENSG00000182450	11	64058774	64067503	3	1	70436	3.2956	0.0004911	KCNK4
All_epilepsy	ENSG00000196408	16	2028918	2034193	7	1	67716	3.2765	0.00052557	NOXO1
All_epilepsy	ENSG00000168026	3	39149152	39180394	82	10	69767	3.269	0.0005397	TTC21A
All_epilepsy	ENSG00000141027	17	15932471	16121499	218	11	70138	3.2619	0.0005534	NCOR1
All_epilepsy	ENSG00000113327	5	161494546	161582542	97	16	69628	3.2593	0.00055853	GABRG2
All_epilepsy	ENSG00000162383	1	53552855	53608289	140	18	69412	3.252	0.00057293	SLC1A7
All_epilepsy	ENSG00000096696	6	7541808	7586950	79	14	69735	3.2503	0.00057649	DSP
All_epilepsy	ENSG00000100601	14	78138747	78174363	117	15	69718	3.2396	0.00059853	ALKBH1
All_epilepsy	ENSG00000065882	4	37892708	38140796	552	74	69293	3.2301	0.00061883	TBC1D1
All_epilepsy	ENSG00000162415	1	45482071	45771881	379	22	69909	3.2285	0.00062224	ZSWIM5
All_epilepsy	ENSG00000153094	2	111876955	111926024	46	6	69160	3.2186	0.00064409	BCL2L11
All_epilepsy	ENSG00000157782	12	121078355	121105127	82	15	66151	3.2159	0.00065007	CABP1
All_epilepsy	ENSG00000135537	6	108616098	108847999	260	25	67796	3.2156	0.00065097	LACE1
All_epilepsy	ENSG00000112787	12	133066137	133161774	123	14	69167	3.2145	0.00065342	FBRSL1
All_epilepsy	ENSG00000197386	4	3076408	3245676	266	21	67182	3.2075	0.00066939	HTT
All_epilepsy	ENSG00000176571	8	87878670	88627447	1482	89	70005	3.2073	0.00067001	CNBD1
All_epilepsy	ENSG00000122188	1	203734304	203745361	22	4	68741	3.2059	0.00067331	LAX1
All_epilepsy	ENSG00000182004	1	203830731	203839678	26	4	70931	3.1965	0.00069554	SNRPE
All_epilepsy	ENSG00000075945	1	169890467	170054349	397	14	68305	3.1917	0.00070718	KIFAP3
All_epilepsy	ENSG00000092445	15	41849873	41871536	27	6	68494	3.1819	0.0007315	TYRO3
All_epilepsy	ENSG00000107859	10	103989943	104001231	17	2	70509	3.1787	0.00073979	PITX3
All_epilepsy	ENSG00000147873	9	21304613	21305312	1	1	71348	3.1756	0.0007477	IFNA5
All_epilepsy	ENSG00000114302	3	48782030	48885279	43	5	69870	3.1745	0.00075038	PRKAR2A
All_epilepsy	ENSG00000156253	21	30376705	30391699	21	5	67538	3.1707	0.00076046	RWDD2B
All_epilepsy	ENSG00000198642	9	21329670	21335379	9	2	66398	3.1702	0.00076175	KLHL9
All_epilepsy	ENSG00000197125	11	124310022	124311054	1	1	69097	3.1665	0.0007714	OR8B8
All_epilepsy	ENSG00000174099	12	65672423	65882024	229	18	69822	3.1614	0.00078515	MSRB3
All_epilepsy	ENSG00000146918	7	158424003	158497520	133	10	70518	3.1605	0.00078746	NCAPG2
All_epilepsy	ENSG00000169129	10	116054583	116164515	66	17	68795	3.1603	0.00078812	AFAP1L2
All_epilepsy	ENSG00000178691	17	30264037	30328064	92	3	67894	3.1509	0.00081388	SUZ12
All_epilepsy	ENSG00000188219	2	131975882	132022965	1	1	42124	3.1508	0.0008142	POTEE
All_epilepsy	ENSG00000105402	19	47990894	48018497	20	3	69801	3.1482	0.00082141	NAPA
All_epilepsy	ENSG00000188677	22	44395091	44568829	177	36	69107	3.1482	0.00082144	PARVB
All_epilepsy	ENSG00000105889	7	22459063	22672544	270	48	69308	3.1469	0.00082506	STEAP1B
All_epilepsy	ENSG00000183527	21	40546695	40555777	34	5	70791	3.1426	0.00083729	PSMG1
All_epilepsy	ENSG00000126246	19	36230058	36233354	2	1	69479	3.1408	0.00084254	IGFLR1
All_epilepsy	ENSG00000171385	1	112313284	112531777	440	74	69228	3.1372	0.00085289	KCND3
All_epilepsy	ENSG00000138483	3	107096188	107097481	4	2	66347	3.1354	0.00085805	CCDC54
All_epilepsy	ENSG00000099901	22	20103461	20114878	10	4	69766	3.1349	0.00085968	RANBP1
All_epilepsy	ENSG00000005020	7	26706681	27034858	554	27	70089	3.1318	0.00086861	SKAP2
All_epilepsy	ENSG00000240184	5	140855580	140892542	62	13	69501	3.1248	0.00088976	PCDHGC3
All_epilepsy	ENSG00000151690	2	191273081	191373931	197	19	70258	3.124	0.000892	MFSD6
All_epilepsy	ENSG00000145920	5	175223313	175311023	147	27	69367	3.1238	0.00089271	CPLX2
All_epilepsy	ENSG00000198844	17	8213559	8225829	18	5	69138	3.1188	0.00090788	ARHGEF15
All_epilepsy	ENSG00000048828	9	96214004	96328397	261	21	69650	3.1141	0.00092254	FAM120A
All_epilepsy	ENSG00000107862	10	104005289	104142656	152	17	69138	3.1041	0.0009542	GBF1
All_epilepsy	ENSG00000175029	10	126676421	126849739	391	59	69087	3.1016	0.00096241	CTBP2
All_epilepsy	ENSG00000115604	2	102927989	103015218	235	15	70787	3.101	0.00096439	IL18R1
All_epilepsy	ENSG00000189320	7	135413096	135433594	40	9	68212	3.098	0.00097405	FAM180A
All_epilepsy	ENSG00000197734	14	78227173	78236085	29	7	69856	3.0929	0.00099113	C14orf178
All_epilepsy	ENSG00000213064	1	168195176	168222263	20	2	70293	3.0911	0.00099716	SFT2D2
All_epilepsy	ENSG00000178467	3	49027319	49044587	8	2	70675	3.0895	0.0010026	P4HTM
All_epilepsy	ENSG00000100097	22	38071615	38075813	5	2	68594	3.0881	0.001007	LGALS1
All_epilepsy	ENSG00000166006	12	75433857	75603648	268	33	69875	3.0871	0.0010104	KCNC2
All_epilepsy	ENSG00000183060	15	100255902	100273766	26	5	68751	3.0789	0.0010387	LYSMD4
All_epilepsy	ENSG00000156273	21	30566392	31003071	536	55	68927	3.0779	0.0010422	BACH1
All_epilepsy	ENSG00000059915	10	104162376	104181296	13	5	69127	3.0723	0.0010623	PSD
All_epilepsy	ENSG00000130204	19	45393826	45406946	7	1	68142	3.0668	0.0010818	TOMM40
All_epilepsy	ENSG00000129028	15	71173681	71185124	2	1	70284	3.0643	0.0010909	THAP10
All_epilepsy	ENSG00000006042	17	31254928	31272124	32	5	69094	3.0643	0.0010909	TMEM98
All_epilepsy	ENSG00000167632	8	140742586	141468678	1351	142	69318	3.061	0.0011032	TRAPPC9
All_epilepsy	ENSG00000151150	10	61786056	62493248	1620	98	69930	3.0594	0.0011088	ANK3
All_epilepsy	ENSG00000171989	15	59499042	59500705	10	2	69040	3.0561	0.0011213	LDHAL6B
All_epilepsy	ENSG00000110917	12	121124672	121139667	37	10	64912	3.0493	0.0011468	MLEC
All_epilepsy	ENSG00000173421	3	49235861	49295537	55	6	69863	3.0406	0.0011804	CCDC36
All_epilepsy	ENSG00000110344	11	118230300	118269926	16	3	69535	3.0328	0.0012117	UBE4A
All_epilepsy	ENSG00000165688	9	139305110	139318213	35	7	68696	3.0301	0.0012225	PMPCA
All_epilepsy	ENSG00000152413	5	78668459	78810040	176	16	69314	3.0269	0.0012355	HOMER1
All_epilepsy	ENSG00000119705	14	78174414	78227447	178	18	69565	3.0257	0.0012405	SLIRP
All_epilepsy	ENSG00000198218	3	49067140	49131796	35	6	69446	3.0235	0.0012493	QRICH1
All_epilepsy	ENSG00000100603	14	78183942	78227550	143	16	69533	3.0214	0.0012579	SNW1
All_epilepsy	ENSG00000178397	7	6369040	6388612	11	1	62126	3.0192	0.0012672	FAM220A
All_epilepsy	ENSG00000178537	3	48894369	48936426	18	2	70625	3.0169	0.001277	SLC25A20
All_epilepsy	ENSG00000188404	1	169659808	169680839	73	11	69514	3.0128	0.0012941	SELL
All_epilepsy	ENSG00000184990	14	105219437	105234831	5	1	68384	3.0119	0.001298	SIVA1
All_epilepsy	ENSG00000005243	17	46103533	46115392	18	7	67614	3.0098	0.0013069	COPZ2
All_epilepsy	ENSG00000133704	12	30781922	30848920	177	12	68929	3.0086	0.0013125	IPO8
All_epilepsy	ENSG00000160305	21	47878812	47989926	339	32	69433	3.0058	0.0013246	DIP2A
All_epilepsy	ENSG00000127483	1	21069154	21113816	70	10	67831	3.0054	0.0013262	HP1BP3
All_epilepsy	ENSG00000155749	2	202152994	202222121	129	14	69374	3.0051	0.0013275	ALS2CR12
All_epilepsy	ENSG00000112333	6	108487262	108510013	8	2	69899	3.0036	0.0013341	NR2E1
All_epilepsy	ENSG00000144366	2	189156396	189460653	479	34	68298	3.0018	0.0013421	GULP1
All_epilepsy	ENSG00000185100	14	105190523	105213662	9	1	68361	3.0007	0.0013469	ADSSL1
All_epilepsy	ENSG00000133401	5	31639517	32111037	587	108	69494	2.9945	0.0013743	PDZD2
All_epilepsy	ENSG00000075151	1	21132963	21503377	521	28	68537	2.9868	0.0014096	EIF4G3
All_epilepsy	ENSG00000115607	2	103035149	103069025	113	10	70869	2.9852	0.001417	IL18RAP
All_epilepsy	ENSG00000152778	10	91174343	91180758	17	5	69413	2.9848	0.001419	IFIT5
All_epilepsy	ENSG00000182389	2	152689290	152955593	494	42	69514	2.9837	0.0014241	CACNB4
All_epilepsy	ENSG00000125434	17	8191081	8198661	10	4	67590	2.9828	0.0014281	SLC25A35
All_epilepsy	ENSG00000111144	12	96394606	96437298	96	11	70534	2.9809	0.0014371	LTA4H
All_epilepsy	ENSG00000135974	2	105953816	105965668	22	5	69711	2.9794	0.001444	C2orf49
All_epilepsy	ENSG00000178252	3	49044495	49053386	5	2	70508	2.9786	0.0014477	WDR6
All_epilepsy	ENSG00000128915	15	60711808	60771359	37	6	70238	2.9707	0.0014858	NARG2
All_epilepsy	ENSG00000126226	13	113831891	113863029	17	2	68831	2.9659	0.0015092	PCID2
All_epilepsy	ENSG00000100092	22	38030661	38062939	49	6	69343	2.9567	0.0015546	SH3BP1
All_epilepsy	ENSG00000139496	13	25875662	25923938	10	2	69958	2.9566	0.0015553	NUPL1
All_epilepsy	ENSG00000078579	8	16849678	16859690	26	7	66693	2.9559	0.0015586	FGF20
All_epilepsy	ENSG00000112195	6	41158015	41168932	18	4	68609	2.954	0.0015685	TREML2
All_epilepsy	ENSG00000163431	1	201865580	201915715	71	11	70371	2.9527	0.0015751	LMOD1
All_epilepsy	ENSG00000177479	3	48956254	49023815	37	4	70303	2.9509	0.0015844	ARIH2
All_epilepsy	ENSG00000117335	1	207925402	207968858	47	9	68265	2.9505	0.0015862	CD46
All_epilepsy	ENSG00000171928	17	18684308	18710027	28	6	67731	2.9497	0.0015906	TVP23B
All_epilepsy	ENSG00000003436	2	188328957	188430487	148	24	68662	2.9434	0.0016233	TFPI
All_epilepsy	ENSG00000204186	2	207139387	207179148	34	3	70944	2.9401	0.0016403	ZDBF2
All_epilepsy	ENSG00000196936	1	248112160	248113098	4	2	67910	2.9377	0.0016533	OR2L8
All_epilepsy	ENSG00000178722	5	60933535	61047590	285	33	70119	2.9334	0.0016761	C5orf64
All_epilepsy	ENSG00000064547	19	19734477	19739739	4	2	70859	2.9267	0.0017131	LPAR2
All_epilepsy	ENSG00000115762	2	131862420	132111282	113	5	70046	2.9251	0.0017216	PLEKHB2
All_epilepsy	ENSG00000165113	9	86354336	86444431	125	6	70939	2.925	0.0017223	GKAP1
All_epilepsy	ENSG00000117020	1	243651535	244014381	322	18	70050	2.9243	0.0017263	AKT3
All_epilepsy	ENSG00000131067	20	33432523	33460663	31	5	71001	2.9238	0.0017288	GGT7
All_epilepsy	ENSG00000169282	3	155755490	156256545	1009	83	68003	2.9166	0.0017692	KCNAB1
All_epilepsy	ENSG00000153310	8	130851839	131029375	231	30	69003	2.9115	0.0017984	FAM49B
All_epilepsy	ENSG00000139793	13	97873688	98046374	238	30	69388	2.9092	0.0018117	MBNL2
All_epilepsy	ENSG00000123609	2	152126979	152146571	57	7	70384	2.9085	0.0018158	NMI
All_epilepsy	ENSG00000273003	11	64781654	64808042	52	6	69183	2.9081	0.0018183	RP11-399J13.3
All_epilepsy	ENSG00000158042	11	6702013	6704632	10	2	69187	2.9062	0.0018293	MRPL17
All_epilepsy	ENSG00000220575	7	154858777	154863267	4	1	69615	2.9046	0.0018387	HTR5A-AS1
All_epilepsy	ENSG00000151240	10	320130	735683	554	38	69166	2.9041	0.0018413	DIP2C
All_epilepsy	ENSG00000100714	14	64854749	64926722	135	17	68869	2.9026	0.0018506	MTHFD1
All_epilepsy	ENSG00000177548	16	28915742	28947847	7	2	67807	2.9003	0.0018642	RABEP2
All_epilepsy	ENSG00000257127	12	92815307	92824778	22	5	70576	2.8976	0.0018802	CLLU1
All_epilepsy	ENSG00000157193	1	53711217	53793742	95	12	69712	2.8969	0.0018846	LRP8
All_epilepsy	ENSG00000160654	11	118215059	118225876	16	3	69361	2.8956	0.0018921	CD3G
All_epilepsy	ENSG00000154721	21	27011584	27089874	163	21	69866	2.8898	0.0019275	JAM2
All_epilepsy	ENSG00000108528	17	4840425	4843546	1	1	70541	2.8897	0.001928	SLC25A11
All_epilepsy	ENSG00000085982	2	234384166	234475428	117	6	70445	2.8888	0.0019333	USP40
All_epilepsy	ENSG00000183578	15	51348795	51397473	82	10	70818	2.8878	0.0019394	TNFAIP8L3
All_epilepsy	ENSG00000102468	13	47405685	47471169	127	22	70048	2.8867	0.0019465	HTR2A
All_epilepsy	ENSG00000163531	1	204797779	204991950	378	40	69444	2.8845	0.0019603	NFASC
All_epilepsy	ENSG00000164142	4	152330368	152584784	381	13	70903	2.8838	0.0019644	FAM160A1
All_epilepsy	ENSG00000159216	21	36160098	37376965	2259	167	69333	2.8833	0.0019679	RUNX1
All_epilepsy	ENSG00000213160	2	170550998	170633499	287	36	69776	2.881	0.0019819	KLHL23
All_epilepsy	ENSG00000092098	14	24615892	24629870	4	2	68195	2.8784	0.0019986	RNF31
All_epilepsy	ENSG00000004776	19	36245469	36248980	2	1	69675	2.8774	0.0020045	HSPB6
All_epilepsy	ENSG00000008441	19	13106422	13209610	48	7	68205	2.8761	0.0020132	NFIX
All_epilepsy	ENSG00000143847	1	202995626	203047868	71	9	69633	2.8761	0.0020133	PPFIA4
All_epilepsy	ENSG00000175115	11	65837834	66012218	218	15	70158	2.8731	0.0020325	PACS1
All_epilepsy	ENSG00000176046	16	28548606	28550495	2	1	69519	2.8695	0.0020557	NUPR1
All_epilepsy	ENSG00000105610	19	12995237	12997995	2	1	66959	2.8686	0.0020616	KLF1
All_epilepsy	ENSG00000106105	7	30634297	30673649	77	11	66671	2.8644	0.0020891	GARS
All_epilepsy	ENSG00000109458	4	144257915	144395721	157	19	68423	2.8641	0.0020909	GAB1
All_epilepsy	ENSG00000146122	6	39760142	39872648	201	29	69108	2.8606	0.0021143	DAAM2
All_epilepsy	ENSG00000114767	3	51967446	51975957	5	1	67463	2.86	0.0021184	RRP9
All_epilepsy	ENSG00000111218	12	3490515	3703139	170	29	69604	2.8585	0.0021281	PRMT8
All_epilepsy	ENSG00000156256	21	30396950	30426809	34	9	65759	2.8469	0.0022071	USP16
All_epilepsy	ENSG00000103404	16	23072727	23160591	144	7	70153	2.8464	0.0022107	USP31
All_epilepsy	ENSG00000110900	12	31079362	31149534	133	31	69257	2.8432	0.0022333	TSPAN11
All_epilepsy	ENSG00000079150	2	179328391	179343327	17	5	68317	2.8426	0.0022373	FKBP7
All_epilepsy	ENSG00000147862	9	14081842	14398982	225	32	69421	2.8422	0.0022399	NFIB
All_epilepsy	ENSG00000118898	16	4932508	5010742	51	9	68445	2.8362	0.0022829	PPL
All_epilepsy	ENSG00000156345	9	90581356	90589668	14	4	68290	2.8342	0.0022972	CDK20
All_epilepsy	ENSG00000177352	3	49199968	49203754	3	1	71255	2.8342	0.0022974	CCDC71
All_epilepsy	ENSG00000139117	12	39040624	39301232	560	41	67903	2.8326	0.0023086	CPNE8
All_epilepsy	ENSG00000112893	5	109025067	109205326	507	31	68721	2.8314	0.0023174	MAN2A1
All_epilepsy	ENSG00000134453	10	6130950	6159420	55	12	66930	2.8312	0.0023185	RBM17
All_epilepsy	ENSG00000102539	13	49794474	49796513	2	1	70520	2.8296	0.0023304	MLNR
All_epilepsy	ENSG00000133561	7	150322463	150329473	15	3	71243	2.8229	0.0023798	GIMAP6
All_epilepsy	ENSG00000133114	13	45563687	45607746	76	11	67954	2.8227	0.0023812	GPALPP1
All_epilepsy	ENSG00000107742	10	73818793	73848790	58	7	70822	2.8223	0.0023839	SPOCK2
All_epilepsy	ENSG00000173166	2	204259068	204400133	77	11	69734	2.8158	0.0024327	RAPH1
All_epilepsy	ENSG00000155393	16	50099852	50140298	86	7	70532	2.8158	0.0024329	HEATR3
All_epilepsy	ENSG00000154556	4	186506598	186877806	692	85	69501	2.8098	0.0024786	SORBS2
All_epilepsy	ENSG00000152193	13	79188426	79233314	69	6	70393	2.8081	0.0024914	RNF219
All_epilepsy	ENSG00000106536	7	39017598	39532694	1222	92	69973	2.8065	0.0025039	POU6F2
All_epilepsy	ENSG00000144711	3	12938719	13114617	247	34	69205	2.8064	0.0025047	IQSEC1
All_epilepsy	ENSG00000008256	7	6201407	6312275	154	18	65037	2.8064	0.0025047	CYTH3
All_epilepsy	ENSG00000149557	11	125315646	125366213	89	13	70112	2.8042	0.002522	FEZ1
All_epilepsy	ENSG00000198862	21	30300466	30365270	105	15	67670	2.8024	0.002536	LTN1
All_epilepsy	ENSG00000163646	3	150643950	150690786	85	13	68513	2.8007	0.00255	CLRN1
All_epilepsy	ENSG00000118156	19	48023942	48059113	17	3	69547	2.7975	0.0025753	ZNF541
All_epilepsy	ENSG00000146592	7	28338940	28865511	957	157	68893	2.7966	0.0025819	CREB5
All_epilepsy	ENSG00000243317	7	135347244	135378166	80	13	68504	2.7898	0.0026374	C7orf73
All_epilepsy	ENSG00000115446	2	99225042	99234978	10	1	70896	2.7875	0.0026559	UNC50
All_epilepsy	ENSG00000108509	17	4871287	4890960	43	8	69356	2.7845	0.0026801	CAMTA2
All_epilepsy	ENSG00000095713	10	99624757	99790585	174	22	69980	2.7838	0.0026862	CRTAC1
All_epilepsy	ENSG00000138443	2	204192942	204312446	103	12	69469	2.7836	0.0026876	ABI2
All_epilepsy	ENSG00000165689	9	139296377	139305061	30	6	69502	2.7828	0.0026945	SDCCAG3
All_epilepsy	ENSG00000058063	3	182511288	182639423	188	9	71058	2.7826	0.002696	ATP11B
All_epilepsy	ENSG00000165046	8	38243725	38267045	15	1	70999	2.7803	0.0027155	LETM2
All_epilepsy	ENSG00000147614	8	86999552	87166457	357	32	70494	2.78	0.0027183	ATP6V0D2
All_epilepsy	ENSG00000152192	13	79172497	79177673	5	2	68869	2.7794	0.0027229	POU4F1
All_epilepsy	ENSG00000130560	9	138824815	138853226	41	4	70049	2.779	0.0027262	UBAC1
All_epilepsy	ENSG00000107625	10	70661034	70706603	95	13	68645	2.7778	0.0027363	DDX50
All_epilepsy	ENSG00000242419	5	140864741	140892546	47	11	69113	2.7778	0.0027367	PCDHGC4
All_epilepsy	ENSG00000136631	1	150039369	150117505	69	4	67930	2.7777	0.0027373	VPS45
All_epilepsy	ENSG00000196151	2	160092304	160143310	178	14	69348	2.7767	0.0027454	WDSUB1
All_epilepsy	ENSG00000198646	20	33284722	33413452	136	10	70756	2.7743	0.0027663	NCOA6
All_epilepsy	ENSG00000135108	12	117581146	117628336	109	4	70974	2.7696	0.0028062	FBXO21
All_epilepsy	ENSG00000206075	18	61143994	61172318	101	9	70002	2.7627	0.0028661	SERPINB5
All_epilepsy	ENSG00000254087	8	56792372	56923940	341	35	69106	2.7622	0.002871	LYN
All_epilepsy	ENSG00000150637	18	67498394	67629039	113	14	69266	2.7594	0.0028957	CD226
All_epilepsy	ENSG00000175548	12	38710380	38717784	18	4	67097	2.7582	0.0029061	ALG10B
All_epilepsy	ENSG00000105383	19	51728320	51747115	4	1	66000	2.7569	0.0029174	CD33
All_epilepsy	ENSG00000079156	2	179059208	179264160	441	52	69123	2.756	0.0029258	OSBPL6
All_epilepsy	ENSG00000127564	16	3018025	3030540	3	1	68593	2.7552	0.002933	PKMYT1
All_epilepsy	ENSG00000013503	12	106751436	106903976	256	16	69194	2.7551	0.0029342	POLR3B
All_epilepsy	ENSG00000181291	17	32907768	32966337	37	7	68609	2.7535	0.0029481	TMEM132E
All_epilepsy	ENSG00000100575	14	58875212	58894332	11	2	67427	2.753	0.0029522	TIMM9
All_epilepsy	ENSG00000119777	2	27255778	27264563	5	2	70809	2.7528	0.0029546	TMEM214
All_epilepsy	ENSG00000128191	22	20067755	20099400	59	6	69957	2.751	0.0029706	DGCR8
All_epilepsy	ENSG00000107242	9	71320575	71624092	491	48	69271	2.7498	0.0029814	PIP5K1B
All_epilepsy	ENSG00000166501	16	23847322	24231932	708	92	68651	2.7493	0.0029862	PRKCB
All_epilepsy	ENSG00000126231	13	113812968	113826694	22	2	68377	2.7481	0.0029967	PROZ
All_epilepsy	ENSG00000142619	1	17575593	17610728	120	18	70073	2.7469	0.003008	PADI3
All_epilepsy	ENSG00000117868	7	158523686	158622944	321	14	70487	2.7464	0.0030128	ESYT2
All_epilepsy	ENSG00000253148	1	192286122	192336415	62	5	69682	2.7463	0.0030132	RGS21
All_epilepsy	ENSG00000198948	4	170907748	170954182	83	14	69548	2.744	0.0030352	MFAP3L
All_epilepsy	ENSG00000005421	7	94926988	95025673	178	29	66420	2.7429	0.0030447	PON1
All_epilepsy	ENSG00000159579	16	57220049	57274387	65	8	68383	2.7403	0.0030695	RSPRY1
All_epilepsy	ENSG00000116095	2	179345195	179381189	42	9	68489	2.7393	0.0030781	PLEKHA3
All_epilepsy	ENSG00000140319	15	40327940	40331389	9	3	65636	2.7387	0.0030843	SRP14
All_epilepsy	ENSG00000162735	1	160246602	160256138	3	1	71203	2.7379	0.0030916	PEX19
All_epilepsy	ENSG00000160298	21	47720095	47743789	56	12	68866	2.7379	0.003092	C21orf58
All_epilepsy	ENSG00000204525	6	31236526	31239907	23	6	68614	2.735	0.003119	HLA-C
All_epilepsy	ENSG00000047849	3	47892182	48130769	144	8	69619	2.7347	0.0031222	MAP4
All_epilepsy	ENSG00000166797	15	64364758	64386217	18	4	67283	2.7296	0.0031701	FAM96A
All_epilepsy	ENSG00000122218	1	160259063	160313190	35	5	69405	2.7296	0.0031706	COPA
All_epilepsy	ENSG00000172046	3	49145479	49158371	6	1	71066	2.7294	0.0031721	USP19
All_epilepsy	ENSG00000139505	13	25802307	25862147	65	6	69701	2.7294	0.0031724	MTMR6
All_epilepsy	ENSG00000125386	4	2626988	2734292	176	16	68219	2.7283	0.0031829	FAM193A
All_epilepsy	ENSG00000134824	11	61560452	61634826	101	13	68628	2.7227	0.0032371	FADS2
All_epilepsy	ENSG00000168884	4	2743375	2758103	41	8	67850	2.7224	0.0032408	TNIP2
All_epilepsy	ENSG00000147548	8	38127215	38239790	71	2	70955	2.7219	0.0032452	WHSC1L1
All_epilepsy	ENSG00000156735	8	38034051	38070819	37	2	71031	2.7209	0.0032548	BAG4
All_epilepsy	ENSG00000136244	7	22765503	22771621	9	3	67960	2.7209	0.0032551	IL6
All_epilepsy	ENSG00000151322	14	33404139	34273382	1400	200	69088	2.7207	0.0032571	NPAS3
All_epilepsy	ENSG00000099904	22	20116979	20135530	22	5	68985	2.7204	0.0032599	ZDHHC8
All_epilepsy	ENSG00000147885	9	21216372	21217310	5	1	65041	2.7182	0.0032818	IFNA16
All_epilepsy	ENSG00000107372	9	74966341	74980163	25	4	69534	2.7168	0.0032961	ZFAND5
All_epilepsy	ENSG00000179213	19	51749603	51772584	8	2	67426	2.7146	0.0033181	SIGLECL1
All_epilepsy	ENSG00000162300	11	64851695	64855870	2	1	69404	2.714	0.0033241	ZFPL1
All_epilepsy	ENSG00000148459	10	26986588	27035727	106	15	69826	2.7132	0.0033322	PDSS1
All_epilepsy	ENSG00000025770	22	50946645	50961901	5	2	68549	2.7129	0.0033347	NCAPH2
All_epilepsy	ENSG00000157240	7	90893783	90898123	4	2	69687	2.7129	0.003335	FZD1
All_epilepsy	ENSG00000167207	16	50727514	50766988	43	5	69702	2.7126	0.0033374	NOD2
All_epilepsy	ENSG00000170681	9	103340361	103350188	33	7	69376	2.7116	0.003348	MURC
All_epilepsy	ENSG00000136546	2	167260083	167350757	182	21	69759	2.7114	0.0033496	SCN7A
All_epilepsy	ENSG00000167210	18	44056935	44236996	427	64	69667	2.709	0.003374	LOXHD1
All_epilepsy	ENSG00000143442	1	151375200	151431941	44	4	70589	2.707	0.0033948	POGZ
All_epilepsy	ENSG00000120159	9	26840683	26892802	77	11	68977	2.7055	0.0034102	CAAP1
All_epilepsy	ENSG00000140497	15	75136071	75165706	23	6	67773	2.7053	0.003412	SCAMP2
All_epilepsy	ENSG00000110063	11	126173647	126215644	100	14	70169	2.7049	0.0034159	DCPS
All_epilepsy	ENSG00000151729	4	186064395	186071536	7	2	68178	2.703	0.003436	SLC25A4
All_epilepsy	ENSG00000121289	19	33369902	33462897	301	26	70787	2.7015	0.0034511	CEP89
All_epilepsy	ENSG00000143376	1	151584541	151671567	43	7	70632	2.6994	0.0034737	SNX27
All_epilepsy	ENSG00000214941	17	15879874	15903031	37	3	70688	2.698	0.0034876	ZSWIM7
All_epilepsy	ENSG00000178919	9	100615536	100618986	16	3	69807	2.6964	0.0035046	FOXE1
All_epilepsy	ENSG00000088836	20	3208063	3219836	16	5	68201	2.6962	0.0035069	SLC4A11
All_epilepsy	ENSG00000124532	6	24403153	24425810	85	7	69710	2.6948	0.003522	MRS2
All_epilepsy	ENSG00000104731	16	87730091	87799598	193	15	69964	2.6946	0.0035233	KLHDC4
All_epilepsy	ENSG00000131495	5	140018325	140027370	16	3	71162	2.694	0.0035303	NDUFA2
All_epilepsy	ENSG00000236980	3	49215065	49229291	13	3	70279	2.6919	0.0035522	C3orf84
All_epilepsy	ENSG00000183513	2	99215773	99224978	14	1	71148	2.6907	0.0035646	COA5
All_epilepsy	ENSG00000170417	2	103353367	103460352	147	11	70773	2.6902	0.0035705	TMEM182
All_epilepsy	ENSG00000165684	9	139270029	139293249	47	4	70544	2.6901	0.0035714	SNAPC4
All_epilepsy	ENSG00000213465	11	64781585	64789656	8	2	65290	2.6893	0.0035801	ARL2
All_epilepsy	ENSG00000135966	2	105880871	105946491	160	20	70232	2.6882	0.0035914	TGFBRAP1
All_epilepsy	ENSG00000078804	20	33292094	33301243	6	2	69627	2.6871	0.003604	TP53INP2
All_epilepsy	ENSG00000177946	16	90036206	90038942	2	1	69505	2.6869	0.0036064	CENPBD1
All_epilepsy	ENSG00000068793	15	22892005	23006016	139	29	68051	2.6838	0.00364	CYFIP1
All_epilepsy	ENSG00000118162	19	47978401	47987525	2	1	70315	2.6837	0.0036403	KPTN
All_epilepsy	ENSG00000105852	7	94989256	95025680	67	10	60952	2.6825	0.0036543	PON3
All_epilepsy	ENSG00000204472	6	31582961	31584798	5	2	70257	2.6811	0.0036686	AIF1
All_epilepsy	ENSG00000166046	12	106695707	106740793	80	10	70116	2.6799	0.0036824	TCP11L2
All_epilepsy	ENSG00000102547	13	49882786	50018262	253	27	69975	2.6765	0.0037198	CAB39L
All_epilepsy	ENSG00000115935	2	175424300	175547644	114	18	69811	2.6764	0.0037205	WIPF1
All_epilepsy	ENSG00000130559	9	138700333	138799074	85	8	69881	2.6763	0.0037216	CAMSAP1
All_epilepsy	ENSG00000181744	3	143690640	143767561	149	11	68314	2.6752	0.0037338	C3orf58
All_epilepsy	ENSG00000163833	3	121311966	121349139	82	15	70327	2.675	0.0037363	FBXO40
All_epilepsy	ENSG00000152518	2	43449541	43453748	3	2	65862	2.6704	0.0037875	ZFP36L2
All_epilepsy	ENSG00000125966	20	33814457	33864801	65	10	67495	2.6703	0.0037887	MMP24
All_epilepsy	ENSG00000110025	11	64794880	64808044	37	4	69856	2.6693	0.0038005	SNX15
All_epilepsy	ENSG00000130561	2	234216462	234255701	116	17	68137	2.6691	0.0038032	SAG
All_epilepsy	ENSG00000204010	10	91137813	91144962	10	3	69584	2.6661	0.0038367	IFIT1B
All_epilepsy	ENSG00000077044	2	234263153	234380750	185	21	68725	2.6658	0.0038403	DGKD
All_epilepsy	ENSG00000159409	1	151674880	151689290	10	4	69474	2.6643	0.0038575	CELF3
All_epilepsy	ENSG00000162869	2	48667737	48742525	151	18	67900	2.6632	0.0038705	PPP1R21
All_epilepsy	ENSG00000196659	2	178413726	178417742	1	1	71325	2.6621	0.003883	TTC30B
All_epilepsy	ENSG00000063978	4	2463947	2627047	197	24	67958	2.6602	0.0039049	RNF4
All_epilepsy	ENSG00000205339	11	9406169	9469673	70	7	69439	2.6572	0.0039397	IPO7
All_epilepsy	ENSG00000118965	2	20110021	20189892	133	14	70770	2.6564	0.0039491	WDR35
All_epilepsy	ENSG00000198807	14	37126773	37148920	42	6	68274	2.6556	0.0039586	PAX9
All_epilepsy	ENSG00000164604	7	112718386	112727833	4	1	69456	2.6545	0.0039711	GPR85
All_epilepsy	ENSG00000109475	4	109541722	109551568	14	3	67156	2.6545	0.0039714	RPL34
All_epilepsy	ENSG00000165891	12	77415027	77459360	80	19	69466	2.654	0.0039773	E2F7
All_epilepsy	ENSG00000140285	15	49715293	49780972	177	18	69812	2.6509	0.0040135	FGF7
All_epilepsy	ENSG00000122863	10	73724123	73773322	97	10	70305	2.6506	0.004017	CHST3
All_epilepsy	ENSG00000165732	10	70715884	70744829	39	8	69105	2.6502	0.0040217	DDX21
All_epilepsy	ENSG00000132716	1	160185505	160254920	39	2	70753	2.6491	0.0040355	DCAF8
All_epilepsy	ENSG00000258465	1	160187254	160254920	39	2	70753	2.6491	0.0040355	DCAF8
All_epilepsy	ENSG00000165985	10	16555742	16564004	13	3	69625	2.645	0.0040843	C1QL3
All_epilepsy	ENSG00000067560	3	49396578	49450431	69	7	69885	2.6447	0.0040883	RHOA
All_epilepsy	ENSG00000174469	7	145813453	148118090	5145	256	69446	2.6443	0.0040936	CNTNAP2
All_epilepsy	ENSG00000041880	3	51976361	51982883	1	1	67490	2.6441	0.004095	PARP3
All_epilepsy	ENSG00000215045	7	6537093	6591067	54	9	65912	2.6436	0.0041009	GRID2IP
All_epilepsy	ENSG00000137274	6	3118608	3153812	38	1	66888	2.6433	0.0041057	BPHL
All_epilepsy	ENSG00000254093	8	10622473	10697394	367	27	69430	2.6428	0.0041109	PINX1
All_epilepsy	ENSG00000120645	12	175931	287626	3	1	66529	2.6403	0.0041417	IQSEC3
All_epilepsy	ENSG00000165115	9	86451613	86536342	109	8	70976	2.638	0.00417	KIF27
All_epilepsy	ENSG00000138592	15	50716577	50793280	186	13	68811	2.6369	0.0041836	USP8
All_epilepsy	ENSG00000143772	1	226819391	226927024	124	17	70076	2.6363	0.0041906	ITPKB
All_epilepsy	ENSG00000198909	17	61699775	61773663	54	3	70847	2.6359	0.0041962	MAP3K3
All_epilepsy	ENSG00000267796	19	36239262	36245420	8	3	69944	2.6327	0.0042348	LIN37
All_epilepsy	ENSG00000065000	19	2100988	2164464	85	7	69274	2.6326	0.0042371	AP3D1
All_epilepsy	ENSG00000183621	10	31109136	31320866	499	33	69974	2.6315	0.0042504	ZNF438
All_epilepsy	ENSG00000176087	5	139944041	139948688	3	1	71002	2.6308	0.0042598	SLC35A4
All_epilepsy	ENSG00000170035	2	181831975	181941312	317	13	70077	2.6294	0.0042767	UBE2E3
All_epilepsy	ENSG00000204469	6	31588497	31605548	45	12	68161	2.6292	0.0042795	PRRC2A
All_epilepsy	ENSG00000054116	1	36602173	36615098	12	2	71122	2.6288	0.0042839	TRAPPC3
All_epilepsy	ENSG00000174547	11	66202546	66234209	19	4	70315	2.6243	0.0043413	MRPL11
All_epilepsy	ENSG00000167881	17	74035184	74068734	36	2	70053	2.6241	0.0043439	SRP68
All_epilepsy	ENSG00000233816	9	21367371	21368075	1	1	63015	2.6228	0.004361	IFNA13
All_epilepsy	ENSG00000258231	12	58937907	59206842	439	52	68901	2.6194	0.0044036	RP11-362K2.2
All_epilepsy	ENSG00000198892	1	201857808	201861434	6	3	69617	2.6191	0.0044086	SHISA4
All_epilepsy	ENSG00000100354	22	40440821	40731812	314	14	70568	2.6161	0.0044465	TNRC6B
All_epilepsy	ENSG00000197046	18	43405477	43424045	25	5	68199	2.6129	0.0044895	SIGLEC15
All_epilepsy	ENSG00000121274	16	50186829	50269221	87	7	67724	2.6126	0.0044931	PAPD5
All_epilepsy	ENSG00000153015	5	64064757	64314590	386	19	68820	2.6112	0.0045113	CWC27
All_epilepsy	ENSG00000166090	14	23842018	23845612	5	1	64701	2.6112	0.0045115	IL25
All_epilepsy	ENSG00000130590	20	62605466	62611361	11	1	69871	2.611	0.004514	SAMD10
All_epilepsy	ENSG00000185745	10	91152303	91163745	21	6	69762	2.6102	0.0045239	IFIT1
All_epilepsy	ENSG00000083799	16	50775961	50835846	57	7	70372	2.6089	0.0045414	CYLD
All_epilepsy	ENSG00000240764	5	140868808	140892546	43	10	69201	2.6063	0.0045761	PCDHGC5
All_epilepsy	ENSG00000163530	3	109012635	109035364	23	5	69451	2.6032	0.0046177	DPPA2
All_epilepsy	ENSG00000164114	4	156263810	156298122	118	12	70305	2.6029	0.0046218	MAP9
All_epilepsy	ENSG00000085719	8	87497059	87573726	185	17	70217	2.6008	0.0046504	CPNE3
All_epilepsy	ENSG00000205356	7	97843936	97881563	46	6	69287	2.6007	0.0046523	TECPR1
All_epilepsy	ENSG00000173638	21	46913486	46964325	45	3	69866	2.5991	0.0046734	SLC19A1
All_epilepsy	ENSG00000147613	8	87060602	87100850	63	10	69818	2.5989	0.0046757	PSKH2
All_epilepsy	ENSG00000198700	1	201798269	201853422	69	11	70114	2.5971	0.0047006	IPO9
All_epilepsy	ENSG00000101049	20	42187608	42216877	12	2	68841	2.5968	0.004705	SGK2
All_epilepsy	ENSG00000157765	4	25656923	25680370	2	1	68716	2.5965	0.0047084	SLC34A2
All_epilepsy	ENSG00000204308	6	32146131	32151930	3	2	68175	2.5954	0.0047245	RNF5
All_epilepsy	ENSG00000139915	14	47308826	48144157	1940	128	69164	2.5953	0.0047255	MDGA2
All_epilepsy	ENSG00000064989	2	188207856	188313187	186	20	69800	2.5946	0.004735	CALCRL
All_epilepsy	ENSG00000174482	9	27948076	28670283	1581	195	69493	2.5935	0.0047504	LINGO2
All_epilepsy	ENSG00000204396	6	31733367	31745108	15	6	67960	2.5931	0.004756	VWA7
All_epilepsy	ENSG00000140853	16	57023397	57117443	81	24	67946	2.5919	0.0047721	NLRC5
All_epilepsy	ENSG00000119541	18	61056423	61089716	63	7	68934	2.589	0.0048134	VPS4B
All_epilepsy	ENSG00000101052	20	42219571	42275936	80	4	69448	2.587	0.0048414	IFT52
All_epilepsy	ENSG00000101104	20	43538703	43587676	52	9	69805	2.5867	0.0048452	PABPC1L
All_epilepsy	ENSG00000173402	3	49506146	49573048	71	6	70398	2.5863	0.0048509	DAG1
All_epilepsy	ENSG00000084710	2	25264999	25378243	174	21	69338	2.5863	0.0048513	EFR3B
All_epilepsy	ENSG00000125820	20	21491648	21494664	2	1	68324	2.586	0.0048555	NKX2-2
All_epilepsy	ENSG00000124172	20	57600522	57607437	6	2	70586	2.5843	0.0048787	ATP5E
All_epilepsy	ENSG00000078328	16	6069095	7763340	5681	350	69239	2.583	0.0048966	RBFOX1
All_epilepsy	ENSG00000113494	5	35048861	35230794	351	39	69111	2.5829	0.0048982	PRLR
All_epilepsy	ENSG00000185792	19	56219798	56249768	21	6	68916	2.5803	0.004935	NLRP9
All_epilepsy	ENSG00000113108	5	139937853	139973337	18	4	70782	2.58	0.0049403	APBB3
All_epilepsy	ENSG00000169018	15	68570141	68588203	13	2	67545	2.5787	0.0049588	FEM1B
All_epilepsy	ENSG00000272781	14	47311134	48143999	1937	127	69161	2.5787	0.004959	MDGA2
All_epilepsy	ENSG00000205423	16	50058321	50070999	24	4	68437	2.5778	0.0049719	CNEP1R1
All_epilepsy	ENSG00000140525	15	89787180	89860492	85	6	70009	2.5776	0.0049745	FANCI
All_epilepsy	ENSG00000173334	8	126442563	126450647	1	1	70378	2.5769	0.004985	TRIB1
All_epilepsy	ENSG00000103742	15	65673802	65715410	29	6	69730	2.5754	0.0050064	IGDCC4
All_epilepsy	ENSG00000049247	1	7903143	7913572	24	9	68483	2.5745	0.0050191	UTS2
All_epilepsy	ENSG00000197548	3	11313995	11599139	456	28	68384	2.5741	0.0050254	ATG7
All_epilepsy	ENSG00000204138	1	28696114	28826881	290	8	68722	2.5737	0.0050309	PHACTR4
All_epilepsy	ENSG00000143603	1	154669931	154842756	242	53	69089	2.5733	0.0050371	KCNN3
All_epilepsy	ENSG00000163659	3	156391024	156424559	50	8	68326	2.5724	0.0050497	TIPARP
All_epilepsy	ENSG00000083544	13	60970591	61148012	279	20	70494	2.5724	0.0050502	TDRD3
All_epilepsy	ENSG00000163254	2	208992861	208994554	2	1	69900	2.5701	0.0050833	CRYGC
All_epilepsy	ENSG00000205085	7	128312342	128326929	43	5	69919	2.5697	0.0050886	FAM71F2
All_epilepsy	ENSG00000104660	8	29952914	30034724	120	12	68697	2.5694	0.0050932	LEPROTL1
All_epilepsy	ENSG00000122971	12	121163538	121177811	29	6	67131	2.5693	0.0050955	ACADS
All_epilepsy	ENSG00000119919	10	101292690	101296278	7	2	70507	2.5677	0.005118	NKX2-3
All_epilepsy	ENSG00000177464	19	46093022	46105466	9	1	70209	2.5671	0.0051273	GPR4
All_epilepsy	ENSG00000074935	6	112391980	112408732	15	2	71064	2.5624	0.0051971	TUBE1
All_epilepsy	ENSG00000196071	1	248100493	248264224	264	22	68830	2.5576	0.0052699	OR2L13
All_epilepsy	ENSG00000146038	6	24171984	24358280	589	59	68202	2.5571	0.0052777	DCDC2
All_epilepsy	ENSG00000135097	12	120779133	120806983	47	6	69890	2.5563	0.0052894	MSI1
All_epilepsy	ENSG00000140009	14	64550950	64804830	474	54	68393	2.5543	0.0053205	ESR2
All_epilepsy	ENSG00000140474	15	75128457	75135687	12	2	70984	2.5515	0.0053629	ULK3
All_epilepsy	ENSG00000174903	11	66036004	66044963	10	3	70051	2.5508	0.0053736	RAB1B
All_epilepsy	ENSG00000065989	19	10527449	10580305	46	7	68906	2.5505	0.0053781	PDE4A
All_epilepsy	ENSG00000153933	17	54911460	54946036	59	3	70711	2.5496	0.0053918	DGKE
All_epilepsy	ENSG00000182255	11	30031288	30038570	9	4	67318	2.5491	0.0053995	KCNA4
All_epilepsy	ENSG00000178149	3	49052921	49059726	4	2	69030	2.5481	0.0054163	DALRD3
All_epilepsy	ENSG00000213949	5	52083730	52255040	357	49	70420	2.5468	0.005435	ITGA1
All_epilepsy	ENSG00000161243	19	39481354	39523425	157	14	69184	2.5464	0.0054415	FBXO27
All_epilepsy	ENSG00000178498	12	57998405	58003587	4	2	69157	2.545	0.0054632	DTX3
All_epilepsy	ENSG00000258724	8	10582909	10697357	486	31	69333	2.5446	0.0054701	SOX7
All_epilepsy	ENSG00000171056	8	10581278	10697357	490	32	69327	2.5434	0.0054885	SOX7
All_epilepsy	ENSG00000136274	7	45120037	45128513	20	5	69919	2.5431	0.0054931	NACAD
All_epilepsy	ENSG00000078898	20	31595406	31611515	18	5	68137	2.542	0.0055105	BPIFB2
All_epilepsy	ENSG00000100842	14	23825611	23834961	13	2	68666	2.5384	0.0055676	EFS
All_epilepsy	ENSG00000134954	11	128328656	128457453	184	39	69513	2.5381	0.0055727	ETS1
All_epilepsy	ENSG00000248383	5	140306302	140391929	94	6	68914	2.5377	0.0055785	PCDHAC1
All_epilepsy	ENSG00000037637	1	16573334	16678949	167	9	70813	2.5359	0.0056078	FBXO42
All_epilepsy	ENSG00000167595	19	36249044	36261930	19	6	69153	2.5337	0.0056429	C19orf55
All_epilepsy	ENSG00000008118	1	209757062	209787283	77	12	69685	2.5328	0.0056579	CAMK1G
All_epilepsy	ENSG00000113141	5	140026643	140042064	19	2	71129	2.5311	0.0056851	IK
All_epilepsy	ENSG00000140521	15	89859534	89878092	19	3	70300	2.5306	0.0056933	POLG
All_epilepsy	ENSG00000204377	1	16555368	16556038	2	1	71047	2.5306	0.0056934	C1orf134
All_epilepsy	ENSG00000077348	19	41892279	41903384	13	1	70492	2.5303	0.0056983	EXOSC5
All_epilepsy	ENSG00000101160	20	57570240	57582302	30	5	69618	2.528	0.005735	CTSZ
All_epilepsy	ENSG00000170458	5	140011313	140013286	2	1	71239	2.5277	0.0057402	CD14
All_epilepsy	ENSG00000179144	7	150211918	150218161	18	5	68804	2.5275	0.0057441	GIMAP7
All_epilepsy	ENSG00000128829	15	40226347	40327797	237	28	69465	2.527	0.0057513	EIF2AK4
All_epilepsy	ENSG00000163832	3	47537130	47555251	11	3	69568	2.5227	0.0058231	ELP6
All_epilepsy	ENSG00000159164	1	149874870	149889434	9	3	66421	2.522	0.0058346	SV2A
All_epilepsy	ENSG00000115368	2	190306159	190340291	156	6	66794	2.5212	0.0058476	WDR75
All_epilepsy	ENSG00000268223	5	115387163	115395815	36	2	70948	2.5203	0.0058625	ARL14EPL
All_epilepsy	ENSG00000172053	3	49133365	49142553	5	2	71278	2.52	0.0058669	QARS
All_epilepsy	ENSG00000068912	2	54014181	54045956	61	10	70027	2.5199	0.0058687	ERLEC1
All_epilepsy	ENSG00000122420	1	78769568	79005434	251	36	69726	2.519	0.0058844	PTGFR
All_epilepsy	ENSG00000163428	3	120043356	120068186	57	8	69483	2.5173	0.0059122	LRRC58
All_epilepsy	ENSG00000163050	1	227085237	227175246	129	27	68939	2.5173	0.0059128	ADCK3
All_epilepsy	ENSG00000007968	1	23832922	23857712	31	4	68409	2.5163	0.0059293	E2F2
All_epilepsy	ENSG00000142230	19	47616531	47713886	24	2	69369	2.5151	0.0059494	SAE1
All_epilepsy	ENSG00000085788	8	38082736	38133076	24	1	70937	2.5134	0.0059783	DDHD2
All_epilepsy	ENSG00000115602	2	102927962	102968497	108	9	70861	2.5132	0.0059822	IL1RL1
All_epilepsy	ENSG00000160949	8	145654165	145669827	15	1	68916	2.513	0.0059855	TONSL
All_epilepsy	ENSG00000185518	15	91643180	91844539	467	49	69419	2.5073	0.0060828	SV2B
All_epilepsy	ENSG00000123552	6	99880190	99969604	112	15	70123	2.5072	0.0060841	USP45
All_epilepsy	ENSG00000214954	8	92114060	92231464	232	14	69503	2.5072	0.0060852	LRRC69
All_epilepsy	ENSG00000011295	17	15902694	15948329	81	8	67945	2.5071	0.0060859	TTC19
All_epilepsy	ENSG00000101158	20	57556263	57570188	10	3	70149	2.5059	0.0061065	NELFCD
All_epilepsy	ENSG00000178999	17	8108056	8113918	11	4	67109	2.5057	0.006111	AURKB
All_epilepsy	ENSG00000138802	4	110354928	110462052	130	8	69389	2.5055	0.0061134	SEC24B
All_epilepsy	ENSG00000156463	5	145316142	145461354	85	7	70048	2.5047	0.0061271	SH3RF2
All_epilepsy	ENSG00000114650	3	47455203	47518616	33	3	70332	2.5041	0.006139	SCAP
All_epilepsy	ENSG00000070214	9	108006903	108201452	293	21	67762	2.5039	0.0061419	SLC44A1
All_epilepsy	ENSG00000000460	1	169631245	169823221	664	39	70175	2.5036	0.0061472	C1orf112
All_epilepsy	ENSG00000198894	14	77564440	77583630	27	5	70351	2.5019	0.0061772	CIPC
All_epilepsy	ENSG00000111554	12	68666223	68726161	66	12	68964	2.5013	0.0061873	MDM1
All_epilepsy	ENSG00000136490	17	61773262	61778532	2	1	71050	2.5006	0.0061991	LIMD2
All_epilepsy	ENSG00000064490	19	19303008	19312678	11	2	69577	2.4985	0.0062367	RFXANK
All_epilepsy	ENSG00000196700	20	62588055	62680113	86	5	69811	2.4981	0.0062437	ZNF512B
All_epilepsy	ENSG00000196860	14	58862634	58875419	2	1	65899	2.4957	0.0062859	TOMM20L
All_epilepsy	ENSG00000146063	5	180649499	180662809	7	2	70035	2.4955	0.0062898	TRIM41
All_epilepsy	ENSG00000033627	17	40610862	40674629	32	7	69211	2.4947	0.0063028	ATP6V0A1
All_epilepsy	ENSG00000177409	7	92759368	92777682	26	8	68946	2.4945	0.0063065	SAMD9L
All_epilepsy	ENSG00000107798	10	90973326	91174314	364	41	67860	2.4939	0.0063175	LIPA
All_epilepsy	ENSG00000171234	4	69917081	69978705	303	11	70602	2.4936	0.0063219	UGT2B7
All_epilepsy	ENSG00000158545	16	88636789	88698374	102	13	69207	2.4909	0.0063708	ZC3H18
All_epilepsy	ENSG00000019995	10	126630692	126676758	58	7	69966	2.4907	0.0063738	ZRANB1
All_epilepsy	ENSG00000184650	17	8243182	8249364	20	3	70334	2.4891	0.0064028	ODF4
All_epilepsy	ENSG00000156475	5	145967936	146464347	776	70	69554	2.4876	0.0064296	PPP2R2B
All_epilepsy	ENSG00000144644	3	30767692	30936257	417	43	70004	2.4867	0.0064461	GADL1
All_epilepsy	ENSG00000173209	2	61404553	61418338	19	5	70164	2.4866	0.0064494	AHSA2
All_epilepsy	ENSG00000119778	2	23971534	24149984	389	22	68957	2.4864	0.006452	ATAD2B
All_epilepsy	ENSG00000110429	11	33762485	33796089	80	10	69518	2.4858	0.0064631	FBXO3
All_epilepsy	ENSG00000175229	11	65809423	65816651	9	3	70150	2.4842	0.0064922	GAL3ST3
All_epilepsy	ENSG00000250733	8	140943416	140946190	7	3	68071	2.4827	0.0065204	C8orf17
All_epilepsy	ENSG00000068878	2	54091204	54197977	235	20	69594	2.4824	0.0065242	PSME4
All_epilepsy	ENSG00000125835	20	2442280	2451499	8	2	70651	2.4824	0.0065257	SNRPB
All_epilepsy	ENSG00000197024	7	148823508	148880116	117	7	70478	2.4821	0.0065303	ZNF398
All_epilepsy	ENSG00000120235	9	21349834	21351377	3	1	70994	2.4819	0.0065341	IFNA6
All_epilepsy	ENSG00000079101	18	596988	650334	26	4	68803	2.4805	0.0065594	CLUL1
All_epilepsy	ENSG00000204970	5	140165876	140391929	124	8	69011	2.4804	0.0065617	PCDHA1
All_epilepsy	ENSG00000092020	14	35554673	35591723	117	15	69696	2.4803	0.0065638	PPP2R3C
All_epilepsy	ENSG00000151882	5	43376747	43412493	42	6	67036	2.4797	0.0065745	CCL28
All_epilepsy	ENSG00000256591	11	61196692	61253294	45	3	70620	2.4769	0.0066262	RP11-286N22.8
All_epilepsy	ENSG00000145016	3	197398264	197476598	92	4	69677	2.4758	0.0066475	KIAA0226
All_epilepsy	ENSG00000073146	22	50528308	50600119	286	10	70487	2.475	0.0066614	MOV10L1
All_epilepsy	ENSG00000077782	8	38268656	38326352	48	8	69157	2.4747	0.0066672	FGFR1
All_epilepsy	ENSG00000185774	4	20730239	21950422	3328	243	69559	2.4735	0.0066896	KCNIP4
All_epilepsy	ENSG00000103174	16	5074845	5084142	17	5	68659	2.4735	0.0066901	NAGPA
All_epilepsy	ENSG00000104856	19	45504688	45541452	3	1	68593	2.4722	0.0067142	RELB
All_epilepsy	ENSG00000110888	12	30862486	30907885	102	10	70027	2.4703	0.0067509	CAPRIN2
All_epilepsy	ENSG00000111266	12	12628829	12715317	105	12	70083	2.4694	0.0067663	DUSP16
All_epilepsy	ENSG00000146576	7	6629648	6648357	41	7	65744	2.4691	0.0067726	C7orf26
All_epilepsy	ENSG00000141524	17	76106539	76128488	4	2	70438	2.4681	0.0067916	TMC6
All_epilepsy	ENSG00000152894	6	128289924	128841870	513	51	66462	2.4681	0.0067924	PTPRK
All_epilepsy	ENSG00000040933	2	99061317	99210853	48	5	70131	2.4678	0.0067979	INPP4A
All_epilepsy	ENSG00000117000	1	40627045	40706593	63	10	69871	2.4647	0.0068555	RLF
All_epilepsy	ENSG00000204969	5	140174444	140391929	123	8	68993	2.4646	0.0068583	PCDHA2
All_epilepsy	ENSG00000255408	5	140180783	140391929	123	8	68993	2.4646	0.0068583	PCDHA3
All_epilepsy	ENSG00000198604	14	35221937	35344853	299	24	69849	2.4645	0.0068595	BAZ1A
All_epilepsy	ENSG00000108518	17	4848947	4852356	8	4	69684	2.4642	0.0068658	PFN1
All_epilepsy	ENSG00000256453	5	140050379	140053171	1	1	71168	2.4636	0.006877	DND1
All_epilepsy	ENSG00000101680	18	6941743	7117813	224	36	69604	2.4632	0.0068856	LAMA1
All_epilepsy	ENSG00000148411	9	138898383	138987131	39	8	69046	2.4624	0.0069	NACC2
All_epilepsy	ENSG00000028528	15	64386322	64438289	62	7	68940	2.461	0.006927	SNX1
All_epilepsy	ENSG00000120314	5	140044261	140053709	12	2	71237	2.461	0.0069284	WDR55
All_epilepsy	ENSG00000213079	6	155054459	155155192	134	11	67155	2.4602	0.006943	SCAF8
All_epilepsy	ENSG00000150867	10	22823778	23003484	432	38	67278	2.4594	0.0069584	PIP4K2A
All_epilepsy	ENSG00000204967	5	140186659	140391929	122	8	69049	2.4585	0.0069761	PCDHA4
All_epilepsy	ENSG00000204965	5	140201222	140391929	122	8	69049	2.4585	0.0069761	PCDHA5
All_epilepsy	ENSG00000081842	5	140207563	140391929	122	8	69049	2.4585	0.0069761	PCDHA6
All_epilepsy	ENSG00000204963	5	140213969	140391929	122	8	69049	2.4585	0.0069761	PCDHA7
All_epilepsy	ENSG00000204962	5	140220907	140391929	122	8	69049	2.4585	0.0069761	PCDHA8
All_epilepsy	ENSG00000204961	5	140227048	140391929	122	8	69049	2.4585	0.0069761	PCDHA9
All_epilepsy	ENSG00000250120	5	140235595	140391929	122	8	69049	2.4585	0.0069761	PCDHA10
All_epilepsy	ENSG00000249158	5	140248689	140391929	122	8	69049	2.4585	0.0069761	PCDHA11
All_epilepsy	ENSG00000113328	5	162864575	162873157	5	2	69529	2.4584	0.0069782	CCNG1
All_epilepsy	ENSG00000174996	11	66024765	66035331	9	3	70587	2.4574	0.006997	KLC2
All_epilepsy	ENSG00000150471	4	62066976	62944053	1097	100	69267	2.4569	0.0070072	LPHN3
All_epilepsy	ENSG00000223638	19	56270380	56274541	3	1	68009	2.4568	0.0070082	RFPL4A
All_epilepsy	ENSG00000203778	6	112408802	112423993	1	1	71346	2.4551	0.007042	FAM229B
All_epilepsy	ENSG00000164323	4	186080819	186130658	98	5	69998	2.453	0.0070828	KIAA1430
All_epilepsy	ENSG00000105926	7	24612887	24733812	316	12	68252	2.4527	0.0070889	MPP6
All_epilepsy	ENSG00000135213	7	75046066	75115548	5	1	67166	2.4517	0.0071094	POM121C
All_epilepsy	ENSG00000143595	1	154293566	154297801	9	3	70368	2.4515	0.0071136	AQP10
All_epilepsy	ENSG00000060762	6	166778407	166796486	11	2	70654	2.4503	0.0071377	MPC1
All_epilepsy	ENSG00000151247	4	99792835	99851788	119	14	69126	2.4489	0.007164	EIF4E
All_epilepsy	ENSG00000119401	9	119449581	119463579	25	7	70933	2.4467	0.0072087	TRIM32
All_epilepsy	ENSG00000159231	21	37507210	37518864	48	6	70246	2.4462	0.0072189	CBR3
All_epilepsy	ENSG00000239389	5	140261793	140391929	119	8	69098	2.4458	0.0072259	PCDHA13
All_epilepsy	ENSG00000227059	12	133794898	133812681	25	6	68152	2.4433	0.0072765	ANHX
All_epilepsy	ENSG00000075213	7	83585093	84122040	1079	79	70175	2.4431	0.0072805	SEMA3A
All_epilepsy	ENSG00000158104	12	122277433	122301502	39	6	70011	2.4415	0.0073127	HPD
All_epilepsy	ENSG00000078053	7	38423305	38671167	886	98	69207	2.4411	0.0073212	AMPH
All_epilepsy	ENSG00000160299	21	47744036	47865682	382	28	68394	2.44	0.0073433	PCNT
All_epilepsy	ENSG00000088280	1	23755056	23811061	85	10	67862	2.44	0.0073436	ASAP3
All_epilepsy	ENSG00000113368	5	126112315	126172712	130	16	70148	2.4395	0.0073542	LMNB1
All_epilepsy	ENSG00000102580	13	96329393	96447243	85	13	69094	2.4371	0.0074018	DNAJC3
All_epilepsy	ENSG00000140988	16	2012053	2014861	9	1	67328	2.437	0.0074043	RPS2
All_epilepsy	ENSG00000251664	5	140255058	140391929	120	8	69110	2.437	0.0074057	PCDHA12
All_epilepsy	ENSG00000100353	22	36906897	36925483	24	4	67496	2.4353	0.0074401	EIF3D
All_epilepsy	ENSG00000120963	8	102190106	102218421	25	3	69125	2.435	0.0074454	ZNF706
All_epilepsy	ENSG00000145029	3	49460379	49466759	6	3	68726	2.4323	0.0075008	NICN1
All_epilepsy	ENSG00000248098	19	41884215	41930910	77	2	70664	2.4291	0.0075676	BCKDHA
All_epilepsy	ENSG00000133872	8	29920528	29940723	25	4	70160	2.4287	0.0075755	TMEM66
All_epilepsy	ENSG00000109762	4	186125391	186291339	346	30	69309	2.4273	0.0076068	SNX25
All_epilepsy	ENSG00000163113	1	149909705	149982625	37	5	67284	2.4269	0.0076136	OTUD7B
All_epilepsy	ENSG00000163106	4	95219686	95264027	64	7	69673	2.4251	0.0076524	HPGDS
All_epilepsy	ENSG00000175161	3	85008132	86123579	2370	91	69737	2.4249	0.007657	CADM2
All_epilepsy	ENSG00000136098	13	52706775	52733996	58	8	67799	2.4246	0.007662	NEK3
All_epilepsy	ENSG00000101161	20	62612488	62664453	52	4	70048	2.4237	0.0076812	PRPF6
All_epilepsy	ENSG00000148057	9	86237964	86259045	42	7	70748	2.4237	0.0076826	IDNK
All_epilepsy	ENSG00000140990	16	2009509	2011976	10	1	69366	2.4219	0.0077205	NDUFB10
All_epilepsy	ENSG00000166793	11	57412560	57417417	2	1	70190	2.4218	0.0077221	YPEL4
All_epilepsy	ENSG00000068028	3	50367219	50378411	8	3	69768	2.4217	0.0077248	RASSF1
All_epilepsy	ENSG00000091136	7	107564244	107643700	79	13	69976	2.4208	0.0077433	LAMB1
All_epilepsy	ENSG00000170584	5	162873532	162887146	16	4	69419	2.4203	0.0077532	NUDCD2
All_epilepsy	ENSG00000132297	8	133073733	133123406	146	22	69672	2.4199	0.0077634	HHLA1
All_epilepsy	ENSG00000183783	4	44175926	44450824	392	44	69629	2.4188	0.0077859	KCTD8
All_epilepsy	ENSG00000177752	4	44624086	44680573	182	14	69791	2.4182	0.0077986	YIPF7
All_epilepsy	ENSG00000117016	1	41086351	41131329	91	13	70075	2.4166	0.0078329	RIMS3
All_epilepsy	ENSG00000108100	10	35535953	35860852	295	17	69876	2.4159	0.0078473	CCNY
All_epilepsy	ENSG00000120832	12	107371069	107380944	15	6	67872	2.4158	0.0078494	MTERFD3
All_epilepsy	ENSG00000010626	12	6982733	7023407	7	2	69350	2.4139	0.0078918	LRRC23
All_epilepsy	ENSG00000102967	16	72042487	72058954	40	7	70347	2.4134	0.0079025	DHODH
All_epilepsy	ENSG00000165730	10	70587298	70655188	125	18	69455	2.4133	0.0079046	STOX1
All_epilepsy	ENSG00000138741	4	122800182	122872909	93	13	69197	2.4129	0.0079121	TRPC3
All_epilepsy	ENSG00000258984	2	238875656	239008053	297	14	70798	2.4114	0.0079447	UBE2F-SCLY
All_epilepsy	ENSG00000154864	18	10666480	11148587	1003	106	69399	2.4112	0.0079502	PIEZO2
All_epilepsy	ENSG00000138031	2	25042038	25142708	309	22	69844	2.4101	0.0079731	ADCY3
All_epilepsy	ENSG00000186265	3	112182815	112218408	27	3	68422	2.4079	0.0080234	BTLA
All_epilepsy	ENSG00000187796	9	139256355	139268133	6	1	70805	2.4075	0.0080309	CARD9
All_epilepsy	ENSG00000255103	1	39876151	39882154	3	1	71328	2.4065	0.0080531	KIAA0754
All_epilepsy	ENSG00000108786	17	40701232	40707231	5	2	69567	2.4057	0.0080715	HSD17B1
All_epilepsy	ENSG00000118160	19	47931274	47975425	52	6	70601	2.4056	0.0080735	SLC8A2
All_epilepsy	ENSG00000205057	12	92813870	92821924	15	3	70890	2.4034	0.0081225	CLLU1OS
All_epilepsy	ENSG00000107819	10	102790991	102800998	1	1	68489	2.4032	0.008127	SFXN3
All_epilepsy	ENSG00000119973	10	120352916	120355160	6	2	67207	2.4024	0.0081446	PRLHR
All_epilepsy	ENSG00000130720	9	133777825	133814673	47	6	68470	2.4023	0.0081451	FIBCD1
All_epilepsy	ENSG00000082146	2	202252581	202345569	121	10	69474	2.4022	0.0081479	STRADB
All_epilepsy	ENSG00000204033	10	85980254	85985345	13	3	70298	2.3991	0.0082179	LRIT2
All_epilepsy	ENSG00000178971	17	8130191	8151362	36	7	68151	2.3987	0.0082262	CTC1
All_epilepsy	ENSG00000163632	3	63805038	63834312	30	8	64670	2.3981	0.0082402	C3orf49
All_epilepsy	ENSG00000166478	11	9481866	9550071	59	6	68608	2.396	0.0082873	ZNF143
All_epilepsy	ENSG00000167880	17	74000583	74023533	16	4	67965	2.395	0.0083101	EVPL
All_epilepsy	ENSG00000076201	3	47422501	47454931	21	2	70915	2.3929	0.008358	PTPN23
All_epilepsy	ENSG00000136240	7	6485584	6523873	56	8	66106	2.3919	0.0083797	KDELR2
All_epilepsy	ENSG00000198597	19	30719197	31204445	521	71	69417	2.3916	0.0083886	ZNF536
All_epilepsy	ENSG00000234409	22	20135950	20138399	8	3	68349	2.3915	0.0083895	AC006547.14
All_epilepsy	ENSG00000173473	3	47626762	47823596	134	5	70243	2.3912	0.0083975	SMARCC1
All_epilepsy	ENSG00000143147	1	168053997	168106821	75	9	70367	2.3907	0.0084083	GPR161
All_epilepsy	ENSG00000099139	9	78505560	78977255	804	134	69280	2.3901	0.0084222	PCSK5
All_epilepsy	ENSG00000145692	5	78407602	78428108	40	8	69646	2.3901	0.0084226	BHMT
All_epilepsy	ENSG00000106052	7	27778950	27884183	180	22	69908	2.3898	0.008428	TAX1BP1
All_epilepsy	ENSG00000136827	9	132575223	132586413	16	4	68107	2.3889	0.0084498	TOR1A
All_epilepsy	ENSG00000154330	9	70943224	71145977	10	4	67443	2.3861	0.0085138	PGM5
All_epilepsy	ENSG00000139531	12	56390964	56400425	6	2	68142	2.3857	0.0085225	SUOX
All_epilepsy	ENSG00000110315	11	10533225	10562777	75	9	70127	2.3857	0.0085243	RNF141
All_epilepsy	ENSG00000144136	2	113403434	113421404	25	4	68687	2.3837	0.0085708	SLC20A1
All_epilepsy	ENSG00000135090	12	118587606	118810750	277	17	68793	2.3835	0.0085747	TAOK3
All_epilepsy	ENSG00000263020	6	31633879	31641323	9	4	68956	2.3802	0.0086505	CSNK2B-LY6G5B-1181
All_epilepsy	ENSG00000115665	2	108602979	108630450	32	9	69475	2.3789	0.0086813	SLC5A7
All_epilepsy	ENSG00000167985	11	61197514	61215001	15	2	70732	2.3788	0.0086836	SDHAF2
All_epilepsy	ENSG00000206560	3	15708743	15901278	267	13	70798	2.3787	0.0086872	ANKRD28
All_epilepsy	ENSG00000143367	1	151512781	151556059	69	12	69572	2.3759	0.0087523	TUFT1
All_epilepsy	ENSG00000099899	22	20099389	20104915	7	3	69549	2.3746	0.0087846	TRMT2A
All_epilepsy	ENSG00000099974	22	24309089	24314721	1	1	68280	2.3736	0.008807	DDTL
All_epilepsy	ENSG00000099977	22	24313554	24322660	1	1	68280	2.3736	0.008807	DDT
All_epilepsy	ENSG00000124615	6	39867354	39902290	70	15	67576	2.3731	0.0088209	MOCS1
All_epilepsy	ENSG00000076641	8	81880045	82024303	176	29	68138	2.3712	0.0088657	PAG1
All_epilepsy	ENSG00000196497	14	24649425	24658170	8	3	70310	2.3657	0.0089986	IPO4
All_epilepsy	ENSG00000168071	11	64107695	64125006	24	6	69241	2.364	0.0090382	CCDC88B
All_epilepsy	ENSG00000168575	8	42273993	42397069	110	15	69045	2.3624	0.0090785	SLC20A2
All_epilepsy	ENSG00000205832	16	4606491	4650715	25	4	69050	2.361	0.0091121	C16orf96
All_epilepsy	ENSG00000168356	3	38887260	38992052	176	18	70599	2.3609	0.0091157	SCN11A
All_epilepsy	ENSG00000109805	4	17812525	17846485	50	6	70103	2.3606	0.0091236	NCAPG
All_epilepsy	ENSG00000103047	16	68877507	69119083	368	33	70062	2.3599	0.0091403	TANGO6
All_epilepsy	ENSG00000078687	17	76000249	76104916	133	14	68832	2.3598	0.0091419	TNRC6C
All_epilepsy	ENSG00000103184	16	5008318	5069159	131	17	69438	2.3585	0.0091736	SEC14L5
All_epilepsy	ENSG00000146285	6	108025308	108145521	300	34	70305	2.3574	0.0092027	SCML4
All_epilepsy	ENSG00000134698	1	36273773	36323491	35	6	68728	2.3563	0.0092288	AGO4
All_epilepsy	ENSG00000112531	6	163835032	163999628	240	18	68675	2.356	0.0092362	QKI
All_epilepsy	ENSG00000187144	1	16713612	16763919	61	11	69017	2.3551	0.0092597	SPATA21
All_epilepsy	ENSG00000163995	4	7967039	8160559	230	51	69056	2.3537	0.0092938	ABLIM2
All_epilepsy	ENSG00000111707	12	118814185	118855840	72	5	68185	2.3523	0.0093294	SUDS3
All_epilepsy	ENSG00000101166	20	57608200	57617964	10	3	69096	2.3517	0.0093439	SLMO2
All_epilepsy	ENSG00000088387	13	99445741	99738879	757	54	69220	2.3516	0.0093468	DOCK9
All_epilepsy	ENSG00000172007	4	140374386	140397763	37	4	70756	2.3504	0.0093779	RAB33B
All_epilepsy	ENSG00000161849	12	52771596	52779436	51	3	70789	2.3474	0.0094526	KRT84
All_epilepsy	ENSG00000174695	5	82348665	82373682	43	4	69804	2.3468	0.0094668	TMEM167A
All_epilepsy	ENSG00000117298	1	21543740	21671997	256	37	68618	2.3456	0.0094989	ECE1
All_epilepsy	ENSG00000113272	5	157158205	157168456	28	4	69025	2.3453	0.0095047	THG1L
All_epilepsy	ENSG00000119231	3	196594727	196661585	121	9	69965	2.345	0.0095127	SENP5
All_epilepsy	ENSG00000166165	14	103985996	103989448	5	2	70160	2.345	0.0095128	CKB
All_epilepsy	ENSG00000130783	12	123258874	123312075	130	11	68160	2.3425	0.0095772	CCDC62
All_epilepsy	ENSG00000119922	10	91061712	91069033	5	2	68426	2.3425	0.0095782	IFIT2
All_epilepsy	ENSG00000174485	15	65950384	66084631	190	9	71147	2.3423	0.0095833	DENND4A
All_epilepsy	ENSG00000196159	4	126237554	126414087	401	47	70066	2.3409	0.0096195	FAT4
All_epilepsy	ENSG00000103653	15	75074398	75095539	26	5	69843	2.3402	0.0096379	CSK
All_epilepsy	ENSG00000066777	8	68085747	68255912	107	8	69606	2.3387	0.0096747	ARFGEF1
All_epilepsy	ENSG00000204414	17	61986957	61996198	11	2	69853	2.3379	0.0096962	CSHL1
All_epilepsy	ENSG00000170425	17	15848231	15879060	17	4	67819	2.3373	0.0097119	ADORA2B
All_epilepsy	ENSG00000126070	1	36396319	36538101	59	6	69239	2.3369	0.0097224	AGO3
All_epilepsy	ENSG00000171133	9	114089763	114090800	2	1	70171	2.3361	0.0097427	OR2K2
All_epilepsy	ENSG00000204764	5	170288874	170727019	613	17	70263	2.3354	0.0097626	RANBP17
All_epilepsy	ENSG00000115993	2	202241930	202316302	108	9	69608	2.3353	0.0097628	TRAK2
All_epilepsy	ENSG00000176256	1	34326076	34330392	5	2	68519	2.3352	0.0097676	HMGB4
All_epilepsy	ENSG00000100926	14	24658349	24682679	34	6	68972	2.3341	0.0097943	TM9SF1
All_epilepsy	ENSG00000254692	14	24658363	24682679	34	6	68972	2.3341	0.0097943	TM9SF1
All_epilepsy	ENSG00000017797	18	9475007	9538114	130	15	69791	2.3324	0.00984	RALBP1
All_epilepsy	ENSG00000197557	2	178477720	178483694	31	5	69424	2.3309	0.009878	TTC30A
All_epilepsy	ENSG00000131016	6	151561134	151679692	301	49	69238	2.3305	0.00989	AKAP12
All_epilepsy	ENSG00000180228	2	179296141	179316239	15	4	69588	2.3299	0.0099051	PRKRA
All_epilepsy	ENSG00000150722	2	182818968	182996125	270	32	68541	2.3298	0.0099071	PPP1R1C
All_epilepsy	ENSG00000163281	4	44684217	44728612	73	6	70049	2.3281	0.0099521	GNPDA2
All_epilepsy	ENSG00000128294	22	26921458	26992681	222	32	70182	2.3276	0.0099665	TPST2
All_epilepsy	ENSG00000143079	1	112938803	113006078	111	4	70956	2.327	0.0099829	CTTNBP2NL
All_epilepsy	ENSG00000171109	3	179065480	179112719	54	8	70920	2.3269	0.0099858	MFN1
All_epilepsy	ENSG00000184182	2	238875469	238951236	174	9	71027	2.3269	0.0099864	UBE2F
All_epilepsy	ENSG00000130311	19	17420327	17434110	39	6	70395	2.3263	0.010001	DDA1
All_epilepsy	ENSG00000090905	16	24741016	24838953	133	15	66673	2.3243	0.010056	TNRC6A
All_epilepsy	ENSG00000170445	5	140052758	140071609	21	3	71303	2.3233	0.010082	HARS
All_epilepsy	ENSG00000140006	14	64063757	64108579	50	3	66868	2.3223	0.010107	WDR89
All_epilepsy	ENSG00000130950	9	97077605	97090926	9	3	65646	2.3222	0.010112	NUTM2F
All_epilepsy	ENSG00000179094	17	8043790	8059824	9	3	69216	2.322	0.010117	PER1
All_epilepsy	ENSG00000204463	6	31606805	31620482	29	9	69344	2.3189	0.0102	BAG6
All_epilepsy	ENSG00000173566	8	21964383	21966932	5	2	70424	2.3175	0.01024	NUDT18
All_epilepsy	ENSG00000219438	22	48885272	49246724	871	110	69060	2.3143	0.010326	FAM19A5
All_epilepsy	ENSG00000018189	4	71569921	71673032	214	13	66004	2.3143	0.010327	RUFY3
All_epilepsy	ENSG00000189001	19	36014269	36019253	15	4	69122	2.3135	0.010349	SBSN
All_epilepsy	ENSG00000139719	12	122714111	122751068	39	5	68653	2.3133	0.010353	VPS33A
All_epilepsy	ENSG00000256223	12	133707161	133736051	56	6	69949	2.3133	0.010353	ZNF10
All_epilepsy	ENSG00000180198	1	28832455	28865812	50	5	67670	2.3132	0.010355	RCC1
All_epilepsy	ENSG00000205643	22	46639908	46646576	22	3	66774	2.3132	0.010357	CDPF1
All_epilepsy	ENSG00000089248	12	112451120	112461255	11	4	67539	2.3127	0.01037	ERP29
All_epilepsy	ENSG00000198680	9	25676396	25678856	5	2	68772	2.3084	0.01049	TUSC1
All_epilepsy	ENSG00000107249	9	3824127	4348392	1392	150	69389	2.3079	0.010502	GLIS3
All_epilepsy	ENSG00000196584	7	152341864	152373250	37	7	67008	2.3072	0.010521	XRCC2
All_epilepsy	ENSG00000147535	8	38120648	38126761	3	1	70732	2.3072	0.010521	PPAPDC1B
All_epilepsy	ENSG00000169067	5	56775846	56778636	4	2	67310	2.3071	0.010525	ACTBL2
All_epilepsy	ENSG00000133687	12	29653773	29937692	583	60	69438	2.3056	0.010566	TMTC1
All_epilepsy	ENSG00000119737	2	54080050	54087126	14	5	69172	2.3048	0.010589	GPR75
All_epilepsy	ENSG00000113615	5	133984479	134063513	21	4	69084	2.3045	0.010596	SEC24A
All_epilepsy	ENSG00000160293	9	136627016	136857726	324	41	69039	2.3034	0.010629	VAV2
All_epilepsy	ENSG00000131650	16	3013945	3018384	1	1	67470	2.303	0.01064	KREMEN2
All_epilepsy	ENSG00000215475	13	46354405	46425871	110	17	69688	2.3002	0.010718	SIAH3
All_epilepsy	ENSG00000135018	9	86274878	86323118	102	9	70878	2.2996	0.010735	UBQLN1
All_epilepsy	ENSG00000149532	11	61170121	61197503	10	2	70414	2.2995	0.010738	CPSF7
All_epilepsy	ENSG00000092847	1	36335409	36395211	26	3	69957	2.2994	0.01074	AGO1
All_epilepsy	ENSG00000079246	2	216972187	217071026	174	19	69906	2.2993	0.010745	XRCC5
All_epilepsy	ENSG00000188315	3	49306035	49315342	8	3	69654	2.2991	0.01075	C3orf62
All_epilepsy	ENSG00000074855	19	17434032	17445638	16	4	70026	2.2988	0.010759	ANO8
All_epilepsy	ENSG00000186919	17	74068042	74079747	4	1	70543	2.2987	0.010761	ZACN
All_epilepsy	ENSG00000136100	13	52986737	53024763	68	7	67935	2.298	0.01078	VPS36
All_epilepsy	ENSG00000150455	11	126152960	126168740	42	10	70106	2.2977	0.010788	TIRAP
All_epilepsy	ENSG00000173542	4	71768043	71888166	57	9	63428	2.2976	0.010792	MOB1B
All_epilepsy	ENSG00000184903	7	110303110	111202573	1157	81	68938	2.2963	0.010828	IMMP2L
All_epilepsy	ENSG00000152409	5	78532012	78623038	128	10	70222	2.296	0.010838	JMY
All_epilepsy	ENSG00000036530	14	100150641	100193638	68	7	69739	2.2953	0.010859	CYP46A1
All_epilepsy	ENSG00000154646	21	19641433	19858197	325	47	69818	2.2943	0.010885	TMPRSS15
All_epilepsy	ENSG00000178802	15	75182346	75191798	8	3	70416	2.2939	0.010899	MPI
All_epilepsy	ENSG00000197992	12	10183276	10218565	39	5	70041	2.2937	0.010904	CLEC9A
All_epilepsy	ENSG00000132330	2	238969530	239008054	96	10	70364	2.2926	0.010936	SCLY
All_epilepsy	ENSG00000007174	17	11501748	11873065	468	61	69492	2.2923	0.010944	DNAH9
All_epilepsy	ENSG00000153443	16	4658884	4665028	4	1	70311	2.2921	0.010949	UBALD1
All_epilepsy	ENSG00000127603	1	39546988	39952849	410	25	67743	2.2912	0.010976	MACF1
All_epilepsy	ENSG00000060688	1	31732417	31769662	76	6	70349	2.289	0.011041	SNRNP40
All_epilepsy	ENSG00000167535	12	49207577	49222724	5	2	69236	2.288	0.011067	CACNB3
All_epilepsy	ENSG00000068745	3	48725436	48777786	51	5	70448	2.288	0.011068	IP6K2
All_epilepsy	ENSG00000256861	12	122692326	122750970	55	6	68544	2.2878	0.011074	RP11-512M8.5
All_epilepsy	ENSG00000142686	1	36179476	36185073	5	2	69275	2.2873	0.01109	C1orf216
All_epilepsy	ENSG00000116741	1	192778169	192781403	1	1	70576	2.2873	0.01109	RGS2
All_epilepsy	ENSG00000162073	16	3019246	3023490	1	1	67474	2.2866	0.01111	PAQR4
All_epilepsy	ENSG00000166262	15	49619159	49913128	713	44	69519	2.285	0.011156	FAM227B
All_epilepsy	ENSG00000196150	8	146076632	146127553	53	7	68315	2.284	0.011186	ZNF250
All_epilepsy	ENSG00000163873	1	37261128	37499730	257	28	68905	2.2839	0.011189	GRIK3
All_epilepsy	ENSG00000112096	6	160090089	160183561	187	15	70056	2.2801	0.011302	SOD2
All_epilepsy	ENSG00000175324	8	38020839	38034248	10	3	70142	2.2797	0.011313	LSM1
All_epilepsy	ENSG00000133056	1	204391756	204463852	113	14	69897	2.2786	0.011347	PIK3C2B
All_epilepsy	ENSG00000177182	8	61969717	62414204	965	85	69097	2.2785	0.011349	CLVS1
All_epilepsy	ENSG00000186642	11	72287185	72385635	183	20	70258	2.2746	0.011466	PDE2A
All_epilepsy	ENSG00000196684	19	16244838	16269386	21	4	69739	2.2745	0.011467	HSH2D
All_epilepsy	ENSG00000174276	11	64883875	64885170	1	1	69681	2.2741	0.01148	ZNHIT2
All_epilepsy	ENSG00000168216	6	70385694	70507003	282	12	70258	2.2739	0.011487	LMBRD1
All_epilepsy	ENSG00000235109	6	28292470	28324048	96	15	66842	2.2731	0.011511	ZSCAN31
All_epilepsy	ENSG00000243440	21	15964251	16031142	107	9	70329	2.2729	0.011516	AF165138.7
All_epilepsy	ENSG00000106069	7	29161890	29553944	956	143	69291	2.2728	0.011519	CHN2
All_epilepsy	ENSG00000127366	7	141490017	141491166	2	1	71349	2.2725	0.011529	TAS2R5
All_epilepsy	ENSG00000029153	12	27485787	27576241	233	39	69161	2.272	0.011542	ARNTL2
All_epilepsy	ENSG00000138081	2	48016455	48132932	222	16	68957	2.2706	0.011587	FBXO11
All_epilepsy	ENSG00000140848	16	57126449	57181878	69	13	67477	2.2705	0.011588	CPNE2
All_epilepsy	ENSG00000143199	1	167778625	167883453	165	29	68846	2.2695	0.01162	ADCY10
All_epilepsy	ENSG00000183921	16	22177618	22203075	14	2	69841	2.2694	0.011621	SDR42E2
All_epilepsy	ENSG00000113889	3	186435065	186461743	113	11	70677	2.269	0.011633	KNG1
All_epilepsy	ENSG00000132600	16	68344877	68392466	91	8	70167	2.2689	0.011637	PRMT7
All_epilepsy	ENSG00000173258	9	114287439	114340124	128	20	68099	2.2669	0.011699	ZNF483
All_epilepsy	ENSG00000183090	4	144498455	144621828	141	11	70444	2.2667	0.011705	FREM3
All_epilepsy	ENSG00000185652	12	5541278	5630702	137	24	69979	2.2663	0.011715	NTF3
All_epilepsy	ENSG00000130943	22	46651560	46659219	24	2	66646	2.2658	0.011731	PKDREJ
All_epilepsy	ENSG00000151806	4	44680444	44702943	28	4	70235	2.2623	0.01184	GUF1
All_epilepsy	ENSG00000163545	1	205271187	205290883	13	3	69166	2.262	0.011849	NUAK2
All_epilepsy	ENSG00000198570	1	211649864	211666259	35	8	68617	2.2613	0.011869	RD3
All_epilepsy	ENSG00000162302	11	64126620	64139687	17	3	70524	2.2612	0.011874	RPS6KA4
All_epilepsy	ENSG00000198053	20	1875154	1920543	36	4	69532	2.2599	0.011912	SIRPA
All_epilepsy	ENSG00000237693	5	150226085	150280298	130	6	70777	2.2589	0.011944	IRGM
All_epilepsy	ENSG00000119986	10	99437181	99447080	22	4	70183	2.2584	0.011959	AVPI1
All_epilepsy	ENSG00000132881	1	16558195	16563657	8	3	70348	2.2564	0.012024	RSG1
All_epilepsy	ENSG00000180998	14	53019866	53104431	144	18	69967	2.2559	0.012038	GPR137C
All_epilepsy	ENSG00000175874	2	101962013	102004057	91	9	70014	2.2553	0.012059	CREG2
All_epilepsy	ENSG00000128482	17	19314438	19320589	4	2	69203	2.255	0.012066	RNF112
All_epilepsy	ENSG00000057704	12	94960900	95044338	208	32	68862	2.2534	0.012116	TMCC3
All_epilepsy	ENSG00000197919	9	21440440	21441315	2	1	66688	2.2519	0.012164	IFNA1
All_epilepsy	ENSG00000170477	12	53200333	53208335	15	4	70376	2.2519	0.012166	KRT4
All_epilepsy	ENSG00000105329	19	41807492	41859816	37	3	69970	2.2518	0.012169	TGFB1
All_epilepsy	ENSG00000101695	18	29598335	29653176	20	3	68922	2.2517	0.012171	RNF125
All_epilepsy	ENSG00000063180	19	49141199	49149569	6	1	68575	2.2516	0.012173	CA11
All_epilepsy	ENSG00000134531	12	13349650	13369708	27	7	69872	2.2516	0.012174	EMP1
All_epilepsy	ENSG00000109861	11	88026760	88070955	129	18	69664	2.2503	0.012215	CTSC
All_epilepsy	ENSG00000143515	1	154298029	154323783	29	5	71031	2.2498	0.012232	ATP8B2
All_epilepsy	ENSG00000144935	3	142442916	142526730	122	11	70002	2.2483	0.012279	TRPC1
All_epilepsy	ENSG00000171862	10	89622870	89731687	81	17	67210	2.2456	0.012366	PTEN
All_epilepsy	ENSG00000198231	17	61850963	61896677	68	5	71131	2.2439	0.01242	DDX42
All_epilepsy	ENSG00000165682	12	10138241	10166023	116	13	68651	2.2426	0.012462	CLEC1B
All_epilepsy	ENSG00000170802	2	48541776	48606433	153	12	69908	2.2421	0.012477	FOXN2
All_epilepsy	ENSG00000121766	1	31769842	31837783	127	9	70222	2.2416	0.012493	ZCCHC17
All_epilepsy	ENSG00000178568	2	212240446	213403565	2869	189	68836	2.2413	0.012503	ERBB4
All_epilepsy	ENSG00000118946	13	58205944	58303445	144	21	70215	2.2374	0.012632	PCDH17
All_epilepsy	ENSG00000213973	19	22939007	22966909	124	7	70803	2.2373	0.012634	ZNF99
All_epilepsy	ENSG00000135702	16	75562433	75569145	11	2	70390	2.2364	0.012663	CHST5
All_epilepsy	ENSG00000111254	12	4724674	4758213	123	15	69838	2.2362	0.012668	AKAP3
All_epilepsy	ENSG00000112855	5	140071011	140078889	8	2	71348	2.234	0.012743	HARS2
All_epilepsy	ENSG00000114648	3	47324407	47388306	29	6	68339	2.2339	0.012744	KLHL18
All_epilepsy	ENSG00000182473	17	74077087	74117657	20	4	68069	2.2335	0.012759	EXOC7
All_epilepsy	ENSG00000080007	6	74104471	74127292	22	5	69945	2.2334	0.012761	DDX43
All_epilepsy	ENSG00000114353	3	50263724	50296787	1	1	71353	2.2325	0.01279	GNAI2
All_epilepsy	ENSG00000157734	15	64443914	64449680	5	2	68818	2.2315	0.012825	SNX22
All_epilepsy	ENSG00000184840	5	177019159	177023125	4	2	68544	2.2309	0.012845	TMED9
All_epilepsy	ENSG00000111671	12	6980099	6998522	3	1	68264	2.2301	0.01287	SPSB2
All_epilepsy	ENSG00000132464	4	71494461	71552533	2	1	63369	2.229	0.012908	ENAM
All_epilepsy	ENSG00000145022	3	49449639	49453908	5	2	70541	2.2286	0.01292	TCTA
All_epilepsy	ENSG00000129559	14	24686058	24701660	7	2	70445	2.2279	0.012942	NEDD8
All_epilepsy	ENSG00000073712	14	53323986	53419153	142	15	69831	2.2268	0.012981	FERMT2
All_epilepsy	ENSG00000116731	1	14026693	14151574	208	22	67669	2.225	0.013042	PRDM2
All_epilepsy	ENSG00000214216	3	158680717	158984096	462	47	70218	2.2246	0.013054	IQCJ
All_epilepsy	ENSG00000168701	16	67261006	67263181	1	1	65748	2.2238	0.01308	TMEM208
All_epilepsy	ENSG00000104885	19	2164148	2232577	53	5	67026	2.2226	0.013122	DOT1L
All_epilepsy	ENSG00000107874	10	104183002	104192418	12	3	70718	2.2219	0.013146	CUEDC2
All_epilepsy	ENSG00000067208	1	92974253	93257961	431	14	70471	2.2218	0.01315	EVI5
All_epilepsy	ENSG00000031081	3	119013220	119139561	337	53	69087	2.2213	0.013165	ARHGAP31
All_epilepsy	ENSG00000104760	8	17721889	17767874	272	22	68383	2.2199	0.013213	FGL1
All_epilepsy	ENSG00000144524	2	232646381	232673963	24	3	69624	2.2191	0.013241	COPS7B
All_epilepsy	ENSG00000023318	9	102741461	102861322	149	10	69196	2.2186	0.013257	ERP44
All_epilepsy	ENSG00000142623	1	17531621	17572500	42	7	69995	2.2185	0.013259	PADI1
All_epilepsy	ENSG00000126259	19	36346763	36358011	5	2	66927	2.2181	0.013275	KIRREL2
All_epilepsy	ENSG00000125629	2	118846028	118868573	38	12	68475	2.2177	0.013288	INSIG2
All_epilepsy	ENSG00000170962	11	103777914	104035107	659	70	69291	2.2173	0.0133	PDGFD
All_epilepsy	ENSG00000107562	10	44793038	44881941	285	41	69288	2.2168	0.013317	CXCL12
All_epilepsy	ENSG00000181472	6	151685252	151712683	26	6	69252	2.2168	0.013319	ZBTB2
All_epilepsy	ENSG00000140057	14	96858448	96955764	64	9	69581	2.2167	0.013321	AK7
All_epilepsy	ENSG00000213694	9	91606362	91619925	14	6	66556	2.215	0.01338	S1PR3
All_epilepsy	ENSG00000137513	11	78147007	78285919	236	6	70905	2.2147	0.01339	NARS2
All_epilepsy	ENSG00000158715	1	205626979	205649587	16	5	68146	2.2137	0.013426	SLC45A3
All_epilepsy	ENSG00000032742	13	21140585	21265503	243	15	68347	2.2135	0.013432	IFT88
All_epilepsy	ENSG00000118579	4	17616254	17635728	32	2	70558	2.2134	0.013434	MED28
All_epilepsy	ENSG00000164035	4	101316498	101801283	1235	79	69168	2.213	0.013449	EMCN
All_epilepsy	ENSG00000136877	9	130556876	130576606	26	5	67165	2.2127	0.013458	FPGS
All_epilepsy	ENSG00000197993	7	142638201	142659768	13	3	67218	2.2124	0.013471	KEL
All_epilepsy	ENSG00000107872	10	104178946	104182893	3	2	67386	2.2117	0.013494	FBXL15
All_epilepsy	ENSG00000177469	17	40554470	40575535	63	9	68906	2.2115	0.0135	PTRF
All_epilepsy	ENSG00000095303	9	125132824	125157982	29	3	69402	2.2109	0.013521	PTGS1
All_epilepsy	ENSG00000197321	10	29746267	30025710	836	97	69746	2.2105	0.013534	SVIL
All_epilepsy	ENSG00000159708	16	67360701	67419106	78	8	66028	2.2089	0.013589	LRRC36
All_epilepsy	ENSG00000177191	19	41931264	41934635	4	1	70513	2.2077	0.013631	B3GNT8
All_epilepsy	ENSG00000162104	16	4003388	4166186	247	35	68929	2.2072	0.01365	ADCY9
All_epilepsy	ENSG00000111331	12	113376157	113411054	79	10	69303	2.2056	0.013706	OAS3
All_epilepsy	ENSG00000169330	15	79724858	79764632	95	17	69059	2.2049	0.013732	KIAA1024
All_epilepsy	ENSG00000167858	17	6692452	6735080	66	11	69028	2.2047	0.013738	TEKT1
All_epilepsy	ENSG00000177311	3	141043055	141168634	167	24	68116	2.2045	0.013746	ZBTB38
All_epilepsy	ENSG00000203710	1	207669492	207813992	122	17	67660	2.2038	0.01377	CR1
All_epilepsy	ENSG00000090612	12	133707570	133783698	154	10	70295	2.2031	0.013794	ZNF268
All_epilepsy	ENSG00000161847	19	10426888	10444316	11	2	68104	2.2016	0.013848	RAVER1
All_epilepsy	ENSG00000136068	3	57994127	58157982	264	26	69771	2.2015	0.01385	FLNB
All_epilepsy	ENSG00000131503	5	139781399	139929163	52	6	70472	2.2003	0.013891	ANKHD1
All_epilepsy	ENSG00000254996	5	139781493	139929154	52	6	70472	2.2003	0.013891	ANKHD1-EIF4EBP3
All_epilepsy	ENSG00000112335	6	108532426	108582464	62	10	67606	2.1997	0.013912	SNX3
All_epilepsy	ENSG00000197724	9	96338689	96441869	315	33	68963	2.1991	0.013934	PHF2
All_epilepsy	ENSG00000108561	17	5336097	5352150	35	8	68407	2.198	0.013974	C1QBP
All_epilepsy	ENSG00000138413	2	209100951	209130798	36	6	67167	2.1971	0.014008	IDH1
All_epilepsy	ENSG00000120910	8	22298332	22398652	117	6	69848	2.1964	0.014033	PPP3CC
All_epilepsy	ENSG00000164366	5	196986	218330	63	9	69873	2.1948	0.014087	CCDC127
All_epilepsy	ENSG00000105323	19	41768401	41813503	33	2	71023	2.1945	0.014099	HNRNPUL1
All_epilepsy	ENSG00000130517	19	18451397	18480760	28	4	68621	2.1925	0.014171	PGPEP1
All_epilepsy	ENSG00000105479	19	48799714	48825151	66	7	69618	2.1921	0.014186	CCDC114
All_epilepsy	ENSG00000115137	2	25166505	25194963	40	7	68872	2.192	0.01419	DNAJC27
All_epilepsy	ENSG00000136891	9	103064359	103115221	84	7	69279	2.1913	0.014214	TEX10
All_epilepsy	ENSG00000124171	20	49348081	49373332	46	9	68546	2.1906	0.014242	PARD6B
All_epilepsy	ENSG00000132463	4	71681499	71705662	58	6	65947	2.1902	0.014256	GRSF1
All_epilepsy	ENSG00000177669	8	29989340	30002202	23	3	68088	2.1896	0.014277	MBOAT4
All_epilepsy	ENSG00000105866	7	21467652	21554440	198	23	67761	2.1896	0.014278	SP4
All_epilepsy	ENSG00000212719	17	21428051	21477722	1	1	69798	2.1895	0.01428	C17orf51
All_epilepsy	ENSG00000163697	4	40812044	41218731	941	112	68726	2.1894	0.014283	APBB2
All_epilepsy	ENSG00000119509	9	102861538	103063282	347	14	68555	2.1873	0.014361	INVS
All_epilepsy	ENSG00000138018	2	26531415	26618759	140	18	68654	2.187	0.014371	EPT1
All_epilepsy	ENSG00000106018	7	158820866	158937649	292	27	68304	2.1869	0.014377	VIPR2
All_epilepsy	ENSG00000120262	6	151815165	151942328	354	41	70159	2.1867	0.014383	CCDC170
All_epilepsy	ENSG00000197841	19	35225060	35233777	11	4	67953	2.1864	0.014393	ZNF181
All_epilepsy	ENSG00000108506	17	59942731	60005377	64	7	69612	2.1863	0.014399	INTS2
All_epilepsy	ENSG00000267673	19	10416103	10426691	11	1	69674	2.1862	0.014401	FDX1L
All_epilepsy	ENSG00000136816	9	132565432	132573560	12	2	69596	2.1857	0.014417	TOR1B
All_epilepsy	ENSG00000128512	7	111366166	111846466	482	80	68867	2.1857	0.014418	DOCK4
All_epilepsy	ENSG00000105357	19	50691443	50813802	101	12	69616	2.1854	0.014429	MYH14
All_epilepsy	ENSG00000130227	8	21777180	21864096	128	8	70752	2.1841	0.014478	XPO7
All_epilepsy	ENSG00000163635	3	63850233	63989138	183	24	65406	2.1839	0.014484	ATXN7
All_epilepsy	ENSG00000134982	5	112043195	112181936	234	19	68020	2.1836	0.014494	APC
All_epilepsy	ENSG00000127364	7	141478242	141479235	3	1	71383	2.1833	0.014507	TAS2R4
All_epilepsy	ENSG00000103319	16	22217603	22298554	52	6	69793	2.1832	0.014512	EEF2K
All_epilepsy	ENSG00000154719	21	26957968	26979829	79	6	70688	2.1828	0.014524	MRPL39
All_epilepsy	ENSG00000106028	7	141438121	141487722	78	2	70725	2.1822	0.014546	SSBP1
All_epilepsy	ENSG00000136147	13	50069746	50103123	82	12	69659	2.1822	0.014548	PHF11
All_epilepsy	ENSG00000014138	11	65029233	65073060	29	4	69986	2.1816	0.01457	POLA2
All_epilepsy	ENSG00000024862	6	139094657	139114456	58	9	69056	2.1814	0.014575	CCDC28A
All_epilepsy	ENSG00000196862	2	108443388	108507297	3	1	69937	2.1811	0.014588	RGPD4
All_epilepsy	ENSG00000213523	5	139916925	139937895	15	4	70397	2.1811	0.014588	SRA1
All_epilepsy	ENSG00000139160	12	31800094	31826048	44	13	67500	2.1809	0.014596	METTL20
All_epilepsy	ENSG00000181722	3	114056941	114866118	1024	97	67627	2.1808	0.014598	ZBTB20
All_epilepsy	ENSG00000139722	12	123349882	123380991	25	5	67902	2.1798	0.014636	VPS37B
All_epilepsy	ENSG00000171798	10	134973951	135039916	99	12	67695	2.1796	0.014642	KNDC1
All_epilepsy	ENSG00000082213	5	31532373	31555165	45	10	69312	2.1792	0.014657	C5orf22
All_epilepsy	ENSG00000161326	17	35849937	35873603	40	7	70767	2.1789	0.014671	DUSP14
All_epilepsy	ENSG00000145216	4	54243810	55161439	1800	160	69928	2.1788	0.014675	FIP1L1
All_epilepsy	ENSG00000163110	4	95373037	95589377	356	29	68371	2.1767	0.014752	PDLIM5
All_epilepsy	ENSG00000149806	11	64888100	64889945	2	1	68886	2.1767	0.014753	FAU
All_epilepsy	ENSG00000272333	19	36208921	36229779	26	7	70387	2.1726	0.014904	KMT2B
All_epilepsy	ENSG00000146457	6	160146617	160177351	50	7	70132	2.1718	0.014936	WTAP
All_epilepsy	ENSG00000102858	16	4666494	4740975	87	9	66619	2.1709	0.014969	MGRN1
All_epilepsy	ENSG00000162385	1	53692564	53704282	13	2	69526	2.1703	0.014993	MAGOH
All_epilepsy	ENSG00000198270	12	112369086	112450970	118	7	69577	2.1701	0.014999	TMEM116
All_epilepsy	ENSG00000124767	6	38643701	38670917	53	12	69927	2.1699	0.015006	GLO1
All_epilepsy	ENSG00000146151	6	55299167	55444012	524	36	69541	2.1695	0.015022	HMGCLL1
All_epilepsy	ENSG00000158806	8	21881636	21894408	3	2	67855	2.1687	0.015051	NPM2
All_epilepsy	ENSG00000182934	11	126132814	126139039	13	4	70875	2.1685	0.015061	SRPR
All_epilepsy	ENSG00000118200	1	200708686	200829832	184	16	70578	2.1682	0.015072	CAMSAP2
All_epilepsy	ENSG00000257545	12	106889736	107168696	481	50	69223	2.1679	0.015082	RP11-144F15.1
All_epilepsy	ENSG00000175768	9	37582643	37592639	15	3	68720	2.1677	0.01509	TOMM5
All_epilepsy	ENSG00000162670	1	190066792	190446759	511	37	70514	2.1676	0.015094	BRINP3
All_epilepsy	ENSG00000156052	9	80331003	80646374	376	27	70243	2.1674	0.015102	GNAQ
All_epilepsy	ENSG00000184047	12	122692210	122712081	16	3	68280	2.1674	0.015103	DIABLO
All_epilepsy	ENSG00000065154	10	126085872	126107545	52	7	69805	2.1655	0.015175	OAT
All_epilepsy	ENSG00000111335	12	113416200	113449528	62	9	69784	2.1648	0.015202	OAS2
All_epilepsy	ENSG00000003402	2	201980827	202041410	105	11	67719	2.1644	0.015217	CFLAR
All_epilepsy	ENSG00000104626	8	8859657	8974256	305	28	68811	2.1639	0.015236	ERI1
All_epilepsy	ENSG00000167483	19	17634110	17664648	9	2	68977	2.1633	0.015259	FAM129C
All_epilepsy	ENSG00000116990	1	40361098	40367928	6	3	68822	2.1632	0.015262	MYCL
All_epilepsy	ENSG00000136842	9	100263462	100364030	168	31	69460	2.1631	0.015265	TMOD1
All_epilepsy	ENSG00000183751	16	2022038	2032934	3	1	67298	2.1622	0.0153	TBL3
All_epilepsy	ENSG00000128519	7	122634759	122635754	2	1	68504	2.1609	0.01535	TAS2R16
All_epilepsy	ENSG00000267534	19	10334520	10341948	1	1	71018	2.1602	0.01538	S1PR2
All_epilepsy	ENSG00000068305	15	100017370	100256671	309	33	69850	2.16	0.015384	MEF2A
All_epilepsy	ENSG00000212643	5	112227313	112228791	5	1	69346	2.1591	0.015419	ZRSR1
All_epilepsy	ENSG00000205089	5	132083137	132089856	4	1	69977	2.1585	0.015444	CCNI2
All_epilepsy	ENSG00000167257	11	117103341	117157161	102	12	69377	2.1583	0.01545	RNF214
All_epilepsy	ENSG00000130299	19	17445729	17453544	23	4	69818	2.158	0.015463	GTPBP3
All_epilepsy	ENSG00000175170	20	25744102	25848861	20	1	66552	2.1576	0.01548	FAM182B
All_epilepsy	ENSG00000095739	10	28966271	28971868	5	2	68578	2.1574	0.015488	BAMBI
All_epilepsy	ENSG00000166535	12	8975068	9039597	104	16	69268	2.1567	0.015514	A2ML1
All_epilepsy	ENSG00000163840	3	122283085	122294050	12	5	69847	2.1566	0.015517	DTX3L
All_epilepsy	ENSG00000251201	5	114914339	114961858	59	8	70183	2.1556	0.015559	TMED7-TICAM2
All_epilepsy	ENSG00000243414	5	114914339	114961876	59	8	70183	2.1556	0.015559	TICAM2
All_epilepsy	ENSG00000173960	2	24150155	24227779	213	16	69139	2.1544	0.015603	UBXN2A
All_epilepsy	ENSG00000105707	19	35531410	35557475	57	8	69022	2.1544	0.015604	HPN
All_epilepsy	ENSG00000092421	5	115779312	115910630	197	40	68453	2.1527	0.015671	SEMA6A
All_epilepsy	ENSG00000148082	9	91628060	91793682	318	35	67102	2.1522	0.01569	SHC3
All_epilepsy	ENSG00000197798	11	126081309	126132881	87	14	70221	2.1522	0.015691	FAM118B
All_epilepsy	ENSG00000060971	3	38144620	38178733	30	9	68683	2.1509	0.015744	ACAA1
All_epilepsy	ENSG00000164893	8	87226281	87333375	201	18	69564	2.1495	0.015796	SLC7A13
All_epilepsy	ENSG00000148187	9	125026882	125085743	21	3	68960	2.1493	0.015806	MRRF
All_epilepsy	ENSG00000198171	20	3170996	3185331	42	8	69148	2.1492	0.015808	DDRGK1
All_epilepsy	ENSG00000107968	10	30722866	30750762	35	5	70393	2.1488	0.015825	MAP3K8
All_epilepsy	ENSG00000159377	1	151372010	151374420	1	1	71368	2.1482	0.01585	PSMB4
All_epilepsy	ENSG00000178773	16	89642176	89663654	26	7	68393	2.1477	0.015868	CPNE7
All_epilepsy	ENSG00000166736	11	113845603	113861035	32	6	69390	2.1475	0.015876	HTR3A
All_epilepsy	ENSG00000105699	19	35739233	35758867	44	9	70387	2.1457	0.015949	LSR
All_epilepsy	ENSG00000179841	14	64932217	64941221	9	3	69572	2.1442	0.01601	AKAP5
All_epilepsy	ENSG00000131634	16	1578689	1605581	75	8	69439	2.1442	0.01601	TMEM204
All_epilepsy	ENSG00000197969	9	79792269	80036457	515	33	69299	2.143	0.016055	VPS13A
All_epilepsy	ENSG00000126062	3	50392180	50397041	1	1	69446	2.1429	0.01606	TMEM115
All_epilepsy	ENSG00000131668	9	96713905	96717654	8	2	70673	2.1428	0.016063	BARX1
All_epilepsy	ENSG00000151327	14	35514113	35582336	206	23	69296	2.1426	0.016073	FAM177A1
All_epilepsy	ENSG00000230873	6	17102489	17131603	49	4	70211	2.1423	0.016083	STMND1
All_epilepsy	ENSG00000148358	9	132815705	132902448	134	13	68187	2.1421	0.016092	GPR107
All_epilepsy	ENSG00000112902	5	9035138	9546187	990	130	69435	2.1419	0.016099	SEMA5A
All_epilepsy	ENSG00000112293	6	24424793	24495433	411	45	68297	2.1416	0.016111	GPLD1
All_epilepsy	ENSG00000156689	11	58601542	58671688	130	8	68363	2.1407	0.016147	GLYATL2
All_epilepsy	ENSG00000108588	17	61822610	61853711	50	4	71037	2.1397	0.01619	CCDC47
All_epilepsy	ENSG00000090621	1	40026488	40042462	26	7	69488	2.1395	0.016196	PABPC4
All_epilepsy	ENSG00000132031	2	20191872	20212455	26	6	70003	2.1378	0.016265	MATN3
All_epilepsy	ENSG00000171199	4	71263599	71275911	29	7	70034	2.1377	0.016271	PROL1
All_epilepsy	ENSG00000136938	9	100745643	100778225	18	4	70331	2.1367	0.016313	ANP32B
All_epilepsy	ENSG00000163104	4	95128762	95212443	135	7	70342	2.1361	0.016337	SMARCAD1
All_epilepsy	ENSG00000142039	19	41816094	41830788	18	2	70321	2.1359	0.016343	CCDC97
All_epilepsy	ENSG00000113119	5	140019012	140024993	9	2	71173	2.1349	0.016385	TMCO6
All_epilepsy	ENSG00000189051	17	8294022	8301144	4	1	70746	2.1339	0.016427	RNF222
All_epilepsy	ENSG00000109756	4	160025330	160281321	288	25	70220	2.1337	0.016435	RAPGEF2
All_epilepsy	ENSG00000163393	1	116519119	116612675	174	23	67878	2.1335	0.016441	SLC22A15
All_epilepsy	ENSG00000007908	1	169691781	169733846	232	13	70586	2.1331	0.016457	SELE
All_epilepsy	ENSG00000143013	1	87794151	87814606	8	2	68289	2.1327	0.016474	LMO4
All_epilepsy	ENSG00000049283	17	48609904	48621111	15	5	69152	2.1324	0.016485	EPN3
All_epilepsy	ENSG00000119004	2	204103663	204163009	41	5	69536	2.1324	0.016486	CYP20A1
All_epilepsy	ENSG00000177414	1	64669310	64733051	125	13	69608	2.1323	0.016491	UBE2U
All_epilepsy	ENSG00000189377	19	42932440	42947200	12	2	70299	2.1314	0.016529	CXCL17
All_epilepsy	ENSG00000136021	12	100660918	100735502	50	4	68518	2.1306	0.016562	SCYL2
All_epilepsy	ENSG00000167461	19	16222439	16245044	17	2	70495	2.1304	0.016568	RAB8A
All_epilepsy	ENSG00000176595	8	1922044	1955102	11	3	65629	2.1249	0.016797	KBTBD11
All_epilepsy	ENSG00000270898	2	53897430	54087297	466	36	69639	2.1248	0.016801	ASB3
All_epilepsy	ENSG00000125903	20	207899	210527	6	2	68528	2.1247	0.016808	DEFB129
All_epilepsy	ENSG00000158473	1	158149737	158154686	7	2	70890	2.1245	0.016813	CD1D
All_epilepsy	ENSG00000167065	22	31048038	31063877	42	10	67916	2.1239	0.01684	DUSP18
All_epilepsy	ENSG00000130726	19	59055458	59062089	7	3	69266	2.1234	0.016861	TRIM28
All_epilepsy	ENSG00000108784	17	40688190	40696467	5	2	68368	2.1222	0.016911	NAGLU
All_epilepsy	ENSG00000169905	1	179809102	179846938	53	9	69497	2.1207	0.016974	TOR1AIP2
All_epilepsy	ENSG00000162882	2	42994229	43019733	83	7	69423	2.1204	0.016984	HAAO
All_epilepsy	ENSG00000135486	12	54673977	54680872	4	2	70324	2.1202	0.016995	HNRNPA1
All_epilepsy	ENSG00000163257	4	17802278	17812381	11	2	70592	2.1185	0.017065	DCAF16
All_epilepsy	ENSG00000176623	8	87480486	87526586	104	9	70350	2.1181	0.017084	RMDN1
All_epilepsy	ENSG00000116729	1	68564142	68698803	340	56	69374	2.1181	0.017085	WLS
All_epilepsy	ENSG00000134014	8	27947190	28048673	170	12	70265	2.1175	0.017107	ELP3
All_epilepsy	ENSG00000160551	17	27717482	27878922	205	12	70587	2.1173	0.017116	TAOK1
All_epilepsy	ENSG00000100888	14	21853353	21924285	75	7	66281	2.117	0.017132	CHD8
All_epilepsy	ENSG00000166510	18	52568740	52626739	65	12	69314	2.1167	0.017141	CCDC68
All_epilepsy	ENSG00000136449	17	48585745	48608862	50	6	70030	2.1162	0.017162	MYCBPAP
All_epilepsy	ENSG00000167600	19	41698954	41713444	7	1	70084	2.1156	0.017188	CYP2S1
All_epilepsy	ENSG00000128513	7	124462440	124570037	253	8	70647	2.1152	0.017206	POT1
All_epilepsy	ENSG00000169851	4	30722037	31148422	827	70	69245	2.1151	0.017212	PCDH7
All_epilepsy	ENSG00000101096	20	50003494	50179370	163	29	68631	2.114	0.017257	NFATC2
All_epilepsy	ENSG00000076604	17	27071002	27077974	5	2	70752	2.114	0.017259	TRAF4
All_epilepsy	ENSG00000000457	1	169818772	169863408	102	10	70486	2.1132	0.017291	SCYL3
All_epilepsy	ENSG00000169413	14	21249210	21250626	1	1	71419	2.1123	0.01733	RNASE6
All_epilepsy	ENSG00000100665	14	95027428	95036250	29	5	70514	2.1119	0.017349	SERPINA4
All_epilepsy	ENSG00000138303	10	73856278	73976892	53	8	69718	2.1118	0.017352	ASCC1
All_epilepsy	ENSG00000028310	5	850406	892939	44	4	64365	2.1114	0.01737	BRD9
All_epilepsy	ENSG00000129351	19	10764937	10803093	29	3	69531	2.1112	0.017379	ILF3
All_epilepsy	ENSG00000138439	2	203499901	203634480	103	11	70373	2.111	0.017385	FAM117B
All_epilepsy	ENSG00000135248	7	128349115	128371797	79	15	69755	2.1108	0.017393	FAM71F1
All_epilepsy	ENSG00000144583	2	217122588	217236750	218	31	70385	2.1104	0.017412	2004-03-01
All_epilepsy	ENSG00000269343	19	58331099	58370018	57	8	69200	2.1099	0.017434	ZNF587B
All_epilepsy	ENSG00000002549	4	17578815	17609595	50	2	70422	2.1093	0.01746	LAP3
All_epilepsy	ENSG00000101440	20	32782375	32857150	77	6	69932	2.1093	0.01746	ASIP
All_epilepsy	ENSG00000092978	1	217600334	217804424	281	35	68762	2.1077	0.017528	GPATCH2
All_epilepsy	ENSG00000185245	17	4835592	4838325	3	2	68461	2.1052	0.017638	GP1BA
All_epilepsy	ENSG00000110074	11	126138950	126148026	12	4	70232	2.1049	0.017651	FOXRED1
All_epilepsy	ENSG00000146066	5	175815748	175816772	3	1	68476	2.1048	0.017652	HIGD2A
All_epilepsy	ENSG00000111305	12	13236494	13256619	11	5	69251	2.1048	0.017656	GSG1
All_epilepsy	ENSG00000004766	7	92861653	92988338	116	17	68713	2.1045	0.017668	CCDC132
All_epilepsy	ENSG00000105401	19	10501810	10530797	33	3	70266	2.1042	0.017681	CDC37
All_epilepsy	ENSG00000168062	11	64755415	64764517	15	5	67025	2.1041	0.017683	BATF2
All_epilepsy	ENSG00000120341	1	177893091	177953438	184	32	69909	2.1037	0.017701	SEC16B
All_epilepsy	ENSG00000134970	5	114949205	114968689	25	5	69897	2.1037	0.017704	TMED7
All_epilepsy	ENSG00000149573	11	118124118	118135251	29	5	68656	2.1036	0.017706	MPZL2
All_epilepsy	ENSG00000100578	14	58894103	59015216	44	7	68983	2.1019	0.01778	KIAA0586
All_epilepsy	ENSG00000226979	6	31539831	31542101	2	1	71340	2.1018	0.017784	LTA
All_epilepsy	ENSG00000198740	17	47366568	47439835	131	12	69781	2.1011	0.017818	ZNF652
All_epilepsy	ENSG00000255582	14	22101992	22103096	3	2	70055	2.101	0.017821	OR10G2
All_epilepsy	ENSG00000198523	6	118869461	118881893	21	5	69989	2.1004	0.017846	PLN
All_epilepsy	ENSG00000168061	11	64808373	64812300	5	2	70557	2.1004	0.017846	SAC3D1
All_epilepsy	ENSG00000085721	16	15153879	15188174	5	2	68426	2.1001	0.017861	RRN3
All_epilepsy	ENSG00000161681	19	51165084	51222707	2	1	68847	2.0993	0.017897	SHANK1
All_epilepsy	ENSG00000187871	6	55192267	55267291	411	28	66188	2.0968	0.018005	GFRAL
All_epilepsy	ENSG00000162779	1	179334855	179523870	888	40	70514	2.0968	0.018007	AXDND1
All_epilepsy	ENSG00000255526	14	24683161	24701558	8	2	70542	2.0966	0.018013	NEDD8-MDP1
All_epilepsy	ENSG00000167434	17	58227297	58248260	9	2	66531	2.0959	0.018047	CA4
All_epilepsy	ENSG00000150873	2	11273179	11286916	3	1	68263	2.0956	0.018058	C2orf50
All_epilepsy	ENSG00000163781	3	133317019	133380737	126	10	69211	2.0956	0.018058	TOPBP1
All_epilepsy	ENSG00000150048	12	10222153	10264226	129	6	70370	2.0953	0.018074	CLEC1A
All_epilepsy	ENSG00000100938	14	24701628	24708448	4	2	69646	2.0952	0.018075	GMPR2
All_epilepsy	ENSG00000025772	20	43570771	43589127	14	3	69730	2.0952	0.018076	TOMM34
All_epilepsy	ENSG00000064651	5	127419458	127525380	110	7	70910	2.095	0.018085	SLC12A2
All_epilepsy	ENSG00000150938	2	36583069	36778278	397	55	69381	2.0949	0.01809	CRIM1
All_epilepsy	ENSG00000198954	10	70748487	70776738	68	11	69031	2.0943	0.018115	KIAA1279
All_epilepsy	ENSG00000158966	1	64936428	65158741	234	37	69050	2.0942	0.01812	CACHD1
All_epilepsy	ENSG00000091592	17	5402747	5522744	414	26	68133	2.0939	0.018136	NLRP1
All_epilepsy	ENSG00000106415	7	8008425	8133902	272	22	69215	2.0934	0.018156	GLCCI1
All_epilepsy	ENSG00000106392	7	7196565	7288282	401	34	68202	2.0929	0.018177	C1GALT1
All_epilepsy	ENSG00000133835	5	118788138	118972894	437	38	68924	2.0929	0.018178	HSD17B4
All_epilepsy	ENSG00000156140	4	73146686	73434516	311	23	69194	2.0929	0.018179	ADAMTS3
All_epilepsy	ENSG00000134853	4	55095264	55164414	95	5	70568	2.0928	0.018181	PDGFRA
All_epilepsy	ENSG00000089127	12	113344582	113369990	77	2	68864	2.0927	0.018189	OAS1
All_epilepsy	ENSG00000151743	12	31824071	31882108	96	17	68142	2.0923	0.018208	AMN1
All_epilepsy	ENSG00000163218	1	153302596	153321316	65	6	70644	2.0919	0.018222	PGLYRP4
All_epilepsy	ENSG00000151014	4	139936943	139966906	23	5	68197	2.0919	0.018223	CCRN4L
All_epilepsy	ENSG00000173825	11	65122238	65125084	3	1	67803	2.0917	0.018232	TIGD3
All_epilepsy	ENSG00000078043	18	44388353	44500123	213	16	66071	2.0916	0.018236	PIAS2
All_epilepsy	ENSG00000005981	7	95107756	95169544	140	23	68385	2.0914	0.018246	ASB4
All_epilepsy	ENSG00000110987	12	122457328	122499948	40	10	68570	2.0914	0.018246	BCL7A
All_epilepsy	ENSG00000174332	1	53971910	54199877	409	37	70012	2.091	0.018266	GLIS1
All_epilepsy	ENSG00000175497	2	115199876	116603328	2432	162	69709	2.0894	0.018335	DPP10
All_epilepsy	ENSG00000039139	5	13690440	13944652	636	56	70225	2.0887	0.018369	DNAH5
All_epilepsy	ENSG00000095627	10	115939029	115992063	97	8	69437	2.087	0.018446	TDRD1
All_epilepsy	ENSG00000218357	22	47857048	47882860	38	3	70037	2.0869	0.018449	LL22NC03-75H12.2
All_epilepsy	ENSG00000139133	12	34175216	34182629	15	4	69479	2.0864	0.018473	ALG10
All_epilepsy	ENSG00000011105	12	3186521	3395730	484	71	69291	2.0844	0.018562	TSPAN9
All_epilepsy	ENSG00000188175	7	92817899	92855837	42	10	68612	2.0842	0.018573	HEPACAM2
All_epilepsy	ENSG00000143217	1	161040785	161059389	22	5	68948	2.0841	0.018576	PVRL4
All_epilepsy	ENSG00000165076	7	141536086	141541287	24	2	70950	2.0834	0.018609	PRSS37
All_epilepsy	ENSG00000047662	4	17630929	17783135	221	9	70299	2.0823	0.018655	FAM184B
All_epilepsy	ENSG00000169856	15	53049637	53083273	35	8	68390	2.0814	0.018699	ONECUT1
All_epilepsy	ENSG00000148218	9	116148597	116163613	13	3	70158	2.0812	0.018706	ALAD
All_epilepsy	ENSG00000127124	1	41972036	42501596	928	94	68810	2.0811	0.018711	HIVEP3
All_epilepsy	ENSG00000042062	20	49202645	49308065	90	10	69846	2.081	0.018716	FAM65C
All_epilepsy	ENSG00000117222	1	205055270	205091143	89	11	69303	2.0809	0.018722	RBBP5
All_epilepsy	ENSG00000196569	6	129204342	129837714	1147	84	69025	2.0801	0.01876	LAMA2
All_epilepsy	ENSG00000151577	3	113847499	113918254	154	24	68380	2.0799	0.018766	DRD3
All_epilepsy	ENSG00000137216	6	44094651	44123256	46	7	69165	2.0794	0.018792	TMEM63B
All_epilepsy	ENSG00000163046	2	132905164	133015542	23	2	67450	2.0789	0.018815	ANKRD30BL
All_epilepsy	ENSG00000122515	7	44788180	44809477	18	3	69790	2.0786	0.018829	ZMIZ2
All_epilepsy	ENSG00000174502	1	205882176	205912588	56	9	68344	2.0765	0.018924	SLC26A9
All_epilepsy	ENSG00000166685	17	71189129	71204646	21	3	70196	2.0765	0.018925	COG1
All_epilepsy	ENSG00000076662	19	10444452	10450499	6	1	70227	2.0764	0.018928	ICAM3
All_epilepsy	ENSG00000189227	15	67813406	67819628	9	3	71063	2.0764	0.018929	C15orf61
All_epilepsy	ENSG00000136878	9	132596977	132644107	253	11	68524	2.076	0.018945	USP20
All_epilepsy	ENSG00000105928	7	24737972	24809244	225	25	69353	2.076	0.018946	DFNA5
All_epilepsy	ENSG00000081014	15	51200869	51298097	193	14	70572	2.0759	0.018953	AP4E1
All_epilepsy	ENSG00000102543	13	49822047	49867618	58	3	70628	2.075	0.018994	CDADC1
All_epilepsy	ENSG00000153815	16	81478775	81745367	525	81	69142	2.0745	0.019014	CMIP
All_epilepsy	ENSG00000144771	3	54952264	55001115	93	11	70234	2.0734	0.019069	LRTM1
All_epilepsy	ENSG00000123124	8	87354967	87490649	298	21	69495	2.0729	0.019089	WWP1
All_epilepsy	ENSG00000241839	15	65134088	65160206	59	8	68885	2.0729	0.019089	PLEKHO2
All_epilepsy	ENSG00000250317	4	25863452	25931435	141	22	68543	2.0725	0.019111	SMIM20
All_epilepsy	ENSG00000069020	5	65892176	66465423	990	106	69741	2.0724	0.019112	MAST4
All_epilepsy	ENSG00000140939	16	67204057	67209643	2	1	67324	2.0723	0.019121	NOL3
All_epilepsy	ENSG00000011376	3	45429998	45590913	195	22	69692	2.071	0.019181	LARS2
All_epilepsy	ENSG00000132153	3	47844399	47891685	24	3	69925	2.0706	0.019198	DHX30
All_epilepsy	ENSG00000031003	5	137273649	137387650	150	9	69909	2.0705	0.019204	FAM13B
All_epilepsy	ENSG00000183640	21	32185016	32185570	1	1	70538	2.0701	0.01922	KRTAP8-1
All_epilepsy	ENSG00000088298	20	33703167	33865928	285	27	69772	2.0695	0.019248	EDEM2
All_epilepsy	ENSG00000186432	3	160212783	160283376	93	13	68774	2.0694	0.019254	KPNA4
All_epilepsy	ENSG00000196772	1	247978102	247979031	4	2	68427	2.0693	0.019259	OR14A16
All_epilepsy	ENSG00000105983	7	156461646	156685924	567	35	68485	2.0674	0.019348	LMBR1
All_epilepsy	ENSG00000162365	1	47603107	47615413	35	5	68624	2.0665	0.01939	CYP4A22
All_epilepsy	ENSG00000142733	1	27681675	27693383	5	2	69815	2.0657	0.019428	MAP3K6
All_epilepsy	ENSG00000198774	12	86198331	86230348	85	11	69134	2.0638	0.019516	RASSF9
All_epilepsy	ENSG00000160613	11	117075053	117103241	56	10	69245	2.0633	0.019543	PCSK7
All_epilepsy	ENSG00000198128	1	248223984	248224922	1	1	70358	2.0621	0.0196	OR2L3
All_epilepsy	ENSG00000136237	7	22157856	22396763	510	71	69594	2.0618	0.019612	RAPGEF5
All_epilepsy	ENSG00000233280	3	97540884	97594132	58	7	70679	2.0614	0.019633	CRYBG3
All_epilepsy	ENSG00000184613	12	44902058	45315631	727	68	68707	2.0605	0.019675	NELL2
All_epilepsy	ENSG00000197771	10	121588972	121652068	176	10	69663	2.0583	0.019779	MCMBP
All_epilepsy	ENSG00000166682	11	113558272	113577095	42	9	69830	2.0578	0.019806	TMPRSS5
All_epilepsy	ENSG00000103489	16	17195626	17564738	664	82	69026	2.0576	0.019816	XYLT1
All_epilepsy	ENSG00000064393	7	139246316	139477577	162	18	69094	2.0571	0.019839	HIPK2
All_epilepsy	ENSG00000011007	1	24069645	24088549	7	3	68229	2.0569	0.01985	TCEB3
All_epilepsy	ENSG00000063176	19	49122548	49133974	1	1	65588	2.0569	0.01985	SPHK2
All_epilepsy	ENSG00000185875	10	25305587	25315593	15	1	71035	2.0554	0.01992	THNSL1
All_epilepsy	ENSG00000145020	3	49454211	49460186	7	2	71280	2.0541	0.019981	AMT
All_epilepsy	ENSG00000219545	7	7680342	8043689	893	119	69785	2.0532	0.020026	RPA3-AS1
All_epilepsy	ENSG00000182054	15	90626277	90645736	10	2	68708	2.0528	0.020044	IDH2
All_epilepsy	ENSG00000004838	3	50378541	50384283	2	1	70044	2.0524	0.020064	ZMYND10
All_epilepsy	ENSG00000105894	7	136912088	137028611	193	33	69075	2.0507	0.020148	PTN
All_epilepsy	ENSG00000131044	20	30458505	30532764	101	17	68535	2.0493	0.020214	TTLL9
All_epilepsy	ENSG00000163412	3	71724567	71803924	97	16	68926	2.0491	0.020225	EIF4E3
All_epilepsy	ENSG00000059691	4	152591656	152682175	158	7	71107	2.0491	0.020227	PET112
All_epilepsy	ENSG00000164742	7	45613739	45762715	249	35	68776	2.0487	0.020244	ADCY1
All_epilepsy	ENSG00000141646	18	48494410	48611415	69	4	70479	2.0487	0.020245	SMAD4
All_epilepsy	ENSG00000171262	15	38746328	38779911	42	7	70183	2.0483	0.020264	FAM98B
All_epilepsy	ENSG00000266173	17	61780192	61819330	57	5	70942	2.0476	0.020301	STRADA
All_epilepsy	ENSG00000221826	19	43225790	43244721	22	3	67286	2.0458	0.02039	PSG3
All_epilepsy	ENSG00000122034	13	27998681	28009958	35	6	69145	2.0457	0.020392	GTF3A
All_epilepsy	ENSG00000104435	8	80523049	80578410	147	23	69012	2.0453	0.020411	STMN2
All_epilepsy	ENSG00000256349	11	66276550	66301084	33	4	70980	2.0414	0.020608	CTD-3074O7.11
All_epilepsy	ENSG00000167904	8	56608983	56685966	142	15	69731	2.0406	0.020647	TMEM68
All_epilepsy	ENSG00000163026	2	24252210	24272445	37	8	70104	2.0405	0.020651	C2orf44
All_epilepsy	ENSG00000152082	2	130939310	130948302	7	1	70168	2.0395	0.020702	MZT2B
All_epilepsy	ENSG00000059588	1	234527059	234614849	224	31	68802	2.0392	0.020715	TARBP1
All_epilepsy	ENSG00000186834	17	43224684	43229468	5	2	70290	2.0392	0.020717	HEXIM1
All_epilepsy	ENSG00000108264	17	35766965	35839835	138	13	70511	2.0389	0.020729	TADA2A
All_epilepsy	ENSG00000152749	13	95254157	95286899	43	5	70161	2.0388	0.020735	GPR180
All_epilepsy	ENSG00000150712	5	32227100	32313115	168	13	66821	2.0386	0.020747	MTMR12
All_epilepsy	ENSG00000170854	3	97660662	97691301	16	3	69880	2.0384	0.020754	MINA
All_epilepsy	ENSG00000136636	1	215740735	215795149	12	4	69333	2.0383	0.020759	KCTD3
All_epilepsy	ENSG00000089639	19	19740285	19754476	10	3	69474	2.0382	0.020765	GMIP
All_epilepsy	ENSG00000186517	1	161016736	161039760	30	6	68914	2.0376	0.020795	ARHGAP30
All_epilepsy	ENSG00000124019	2	225243415	225266802	45	8	69912	2.0375	0.020799	FAM124B
All_epilepsy	ENSG00000154240	17	63631656	64188202	1630	58	69898	2.0359	0.020878	CEP112
All_epilepsy	ENSG00000146007	5	140078265	140086248	10	2	71226	2.0352	0.020915	ZMAT2
All_epilepsy	ENSG00000174483	11	66278077	66301098	30	4	70977	2.0334	0.021007	BBS1
All_epilepsy	ENSG00000143776	1	227177566	227506175	1397	41	70282	2.0334	0.021008	CDC42BPA
All_epilepsy	ENSG00000103769	15	66018392	66184329	238	16	70398	2.032	0.021077	RAB11A
All_epilepsy	ENSG00000136270	7	45139699	45151646	22	6	69593	2.0317	0.021094	TBRG4
All_epilepsy	ENSG00000134077	3	9404526	9428475	41	5	69751	2.0313	0.02111	THUMPD3
All_epilepsy	ENSG00000168502	18	8705659	8832776	195	33	69950	2.0308	0.021137	SOGA2
All_epilepsy	ENSG00000256073	21	33765439	33766254	2	1	71015	2.0308	0.02114	C21orf119
All_epilepsy	ENSG00000186086	1	108918421	109013624	3	1	67402	2.0307	0.021141	NBPF6
All_epilepsy	ENSG00000139726	12	123237321	123255611	30	4	69551	2.0307	0.021143	DENR
All_epilepsy	ENSG00000112031	6	153308497	153323820	37	6	71048	2.0303	0.021161	MTRF1L
All_epilepsy	ENSG00000164087	3	52109269	52188706	58	5	70925	2.0298	0.021187	POC1A
All_epilepsy	ENSG00000124788	6	16299343	16761722	823	137	69017	2.0296	0.021197	ATXN1
All_epilepsy	ENSG00000138772	4	79472673	79531597	101	14	69310	2.0293	0.021212	ANXA3
All_epilepsy	ENSG00000102974	16	67596310	67673086	62	9	65945	2.0286	0.02125	CTCF
All_epilepsy	ENSG00000163682	4	39455744	39460568	19	5	70518	2.0282	0.02127	RPL9
All_epilepsy	ENSG00000163875	1	37958176	37980375	60	10	70032	2.0278	0.021291	MEAF6
All_epilepsy	ENSG00000113966	3	97483365	97519953	47	8	69324	2.0272	0.021319	ARL6
All_epilepsy	ENSG00000160145	3	123798870	124445172	1587	144	69721	2.0264	0.021363	KALRN
All_epilepsy	ENSG00000072571	5	162887209	162918947	58	9	70375	2.026	0.021382	HMMR
All_epilepsy	ENSG00000175906	17	41476327	41478505	4	2	69148	2.026	0.021383	ARL4D
All_epilepsy	ENSG00000164134	4	140222609	140341187	131	8	70677	2.0248	0.021442	NAA15
All_epilepsy	ENSG00000258417	8	133036467	133097902	131	16	70295	2.0245	0.02146	OC90
All_epilepsy	ENSG00000259384	17	61994560	61996179	1	1	70522	2.0241	0.02148	GH1
All_epilepsy	ENSG00000100918	14	24641062	24649463	13	3	69931	2.0237	0.021502	REC8
All_epilepsy	ENSG00000058729	5	96496571	96518964	45	7	70380	2.0234	0.021516	RIOK2
All_epilepsy	ENSG00000165671	5	176560026	176727216	223	16	66610	2.0234	0.021516	NSD1
All_epilepsy	ENSG00000050748	5	179660143	179719099	111	17	69896	2.0232	0.021529	MAPK9
All_epilepsy	ENSG00000105516	19	49133287	49140695	5	1	67030	2.0229	0.021544	DBP
All_epilepsy	ENSG00000188611	10	51942538	52008370	26	4	69957	2.0226	0.021558	ASAH2
All_epilepsy	ENSG00000162654	1	89646831	89664615	24	6	69134	2.0223	0.021572	GBP4
All_epilepsy	ENSG00000175746	15	39542885	39547046	10	3	69797	2.0216	0.021608	C15orf54
All_epilepsy	ENSG00000069011	5	134363425	134370503	19	2	69768	2.021	0.021641	PITX1
All_epilepsy	ENSG00000183379	14	74872596	74892805	40	6	69720	2.0205	0.021663	SYNDIG1L
All_epilepsy	ENSG00000155858	5	157170703	157187717	30	5	70347	2.0194	0.021725	LSM11
All_epilepsy	ENSG00000163093	2	170335688	170382432	100	18	70140	2.0191	0.021737	BBS5
All_epilepsy	ENSG00000170558	18	25530930	25757410	365	38	69845	2.019	0.021745	CDH2
All_epilepsy	ENSG00000215912	1	2567415	2718286	35	3	69934	2.019	0.021746	TTC34
All_epilepsy	ENSG00000119720	14	90742580	90798481	76	9	70859	2.0186	0.021766	NRDE2
All_epilepsy	ENSG00000038427	5	82767284	82878122	171	32	69463	2.0182	0.021784	VCAN
All_epilepsy	ENSG00000144214	2	99900701	99921205	26	5	69431	2.018	0.021795	LYG1
All_epilepsy	ENSG00000067365	16	8715540	8740081	22	4	67965	2.0175	0.021821	METTL22
All_epilepsy	ENSG00000132530	17	6658766	6678966	23	5	69691	2.0174	0.021826	XAF1
All_epilepsy	ENSG00000175970	12	121148238	121161443	43	9	65108	2.0174	0.021829	UNC119B
All_epilepsy	ENSG00000169139	8	48920960	48977268	18	3	69530	2.0165	0.021876	UBE2V2
All_epilepsy	ENSG00000152582	5	35617946	35814713	513	46	69293	2.0161	0.021896	SPEF2
All_epilepsy	ENSG00000078747	20	32951041	33099198	114	4	70883	2.0155	0.021929	ITCH
All_epilepsy	ENSG00000080200	3	97595819	97663810	68	6	70393	2.0153	0.021938	CRYBG3
All_epilepsy	ENSG00000132275	11	6616305	6624850	5	2	69460	2.0151	0.021949	RRP8
All_epilepsy	ENSG00000186187	16	75032928	75144892	101	8	69410	2.0148	0.021962	ZNRF1
All_epilepsy	ENSG00000159713	16	67423712	67427438	8	3	65938	2.0147	0.021971	TPPP3
All_epilepsy	ENSG00000159714	16	67428322	67450736	24	5	65858	2.0143	0.021988	ZDHHC1
All_epilepsy	ENSG00000141642	18	48494361	48514491	11	2	68737	2.0134	0.022037	ELAC1
All_epilepsy	ENSG00000118518	6	127587755	127609712	36	6	69651	2.0131	0.022052	RNF146
All_epilepsy	ENSG00000149089	11	34874641	34938046	275	14	70817	2.0129	0.022064	APIP
All_epilepsy	ENSG00000205413	7	92728829	92747336	28	6	69851	2.0128	0.02207	SAMD9
All_epilepsy	ENSG00000072201	4	54325468	54567572	604	64	70320	2.0124	0.022088	LNX1
All_epilepsy	ENSG00000103227	16	903634	1031318	243	12	69378	2.0115	0.022134	LMF1
All_epilepsy	ENSG00000129646	17	74270130	74303761	91	9	69844	2.0115	0.022139	QRICH2
All_epilepsy	ENSG00000121864	3	179040779	179053323	15	5	70614	2.0114	0.022141	ZNF639
All_epilepsy	ENSG00000089177	20	16252749	16554078	928	96	69575	2.0111	0.02216	KIF16B
All_epilepsy	ENSG00000176915	12	133302254	133338474	78	12	68947	2.0105	0.022188	ANKLE2
All_epilepsy	ENSG00000099940	22	21213271	21245506	51	6	70339	2.0104	0.022192	SNAP29
All_epilepsy	ENSG00000147642	8	110586207	110704020	231	25	68928	2.0098	0.022224	SYBU
All_epilepsy	ENSG00000166347	18	71920530	71959251	97	10	70209	2.0098	0.022225	CYB5A
All_epilepsy	ENSG00000156471	8	97273943	97349223	97	12	69157	2.0097	0.022231	PTDSS1
All_epilepsy	ENSG00000100314	22	30116073	30127828	24	7	69227	2.0097	0.022231	CABP7
All_epilepsy	ENSG00000179869	7	48211055	48687092	1304	85	69588	2.009	0.02227	ABCA13
All_epilepsy	ENSG00000141627	18	46570039	46987717	790	28	70437	2.0082	0.022309	DYM
All_epilepsy	ENSG00000165983	10	16478942	16555736	204	19	69771	2.0078	0.022331	PTER
All_epilepsy	ENSG00000138433	2	175212750	175260443	49	10	69246	2.0078	0.022332	CIR1
All_epilepsy	ENSG00000007062	4	15964699	16086001	244	44	69566	2.0077	0.022337	PROM1
All_epilepsy	ENSG00000176635	22	30476163	30573064	165	19	69711	2.0073	0.022359	HORMAD2
All_epilepsy	ENSG00000198466	19	58361225	58376480	27	5	68104	2.0071	0.022368	ZNF587
All_epilepsy	ENSG00000198586	2	171847333	172087824	396	20	69722	2.0062	0.022416	TLK1
All_epilepsy	ENSG00000205581	21	40714241	40721573	19	3	70106	2.0061	0.022422	HMGN1
All_epilepsy	ENSG00000134539	12	10378657	10469850	183	18	69484	2.0059	0.022432	KLRD1
All_epilepsy	ENSG00000173567	2	26531041	26569685	53	13	68063	2.0057	0.022446	GPR113
All_epilepsy	ENSG00000109381	4	139949266	140098372	133	16	68329	2.0056	0.022447	ELF2
All_epilepsy	ENSG00000155918	6	150339470	150346668	10	2	67073	2.0054	0.022461	RAET1L
All_epilepsy	ENSG00000170801	4	8271492	8308838	23	2	70473	2.0013	0.022683	HTRA3
All_epilepsy	ENSG00000163629	4	87515468	87736324	480	21	68711	2.0003	0.022732	PTPN13
All_epilepsy	ENSG00000171804	19	38375463	38397317	25	6	70072	1.9991	0.022801	WDR87
All_epilepsy	ENSG00000165416	13	53226844	53275044	107	6	68053	1.9989	0.022809	SUGT1
All_epilepsy	ENSG00000084731	2	26149471	26205618	78	10	68290	1.9985	0.022833	KIF3C
All_epilepsy	ENSG00000168070	11	64704989	64739557	67	6	67546	1.9979	0.022864	C11orf85
All_epilepsy	ENSG00000187715	3	127634075	127706514	105	10	70261	1.9964	0.022948	KBTBD12
All_epilepsy	ENSG00000124191	20	42543504	42698256	190	31	69738	1.9947	0.023038	TOX2
All_epilepsy	ENSG00000146909	7	156742417	156765876	108	10	70234	1.9938	0.023087	NOM1
All_epilepsy	ENSG00000171475	17	38375556	38440388	64	4	68725	1.9933	0.023112	WIPF2
All_epilepsy	ENSG00000125898	20	814358	838106	20	2	68857	1.9934	0.023112	FAM110A
All_epilepsy	ENSG00000120438	6	160199530	160210781	23	5	70182	1.9933	0.023116	TCP1
All_epilepsy	ENSG00000163421	3	71820807	71834357	9	3	68971	1.9927	0.023146	PROK2
All_epilepsy	ENSG00000115239	2	53759810	54087170	745	67	69374	1.9926	0.023152	GPR75-ASB3
All_epilepsy	ENSG00000170265	7	148892577	148923339	81	10	70038	1.9926	0.023154	ZNF282
All_epilepsy	ENSG00000054392	1	210501596	210849638	949	128	69421	1.9923	0.023168	HHAT
All_epilepsy	ENSG00000094916	12	54624724	54673886	19	2	69159	1.9923	0.023169	CBX5
All_epilepsy	ENSG00000163812	3	44956749	45017677	70	9	67984	1.9912	0.023232	ZDHHC3
All_epilepsy	ENSG00000105186	19	33087913	33167503	312	25	69399	1.9907	0.023258	ANKRD27
All_epilepsy	ENSG00000061918	4	156680144	156728743	31	6	69141	1.9906	0.02326	GUCY1B3
All_epilepsy	ENSG00000073350	17	73521161	73571289	66	7	69734	1.9906	0.023262	LLGL2
All_epilepsy	ENSG00000081803	7	121958481	122526813	908	82	69492	1.9906	0.023263	CADPS2
All_epilepsy	ENSG00000174527	12	109785708	109893328	352	32	69031	1.9903	0.023277	MYO1H
All_epilepsy	ENSG00000179603	7	126078652	126893348	1661	102	70524	1.9902	0.023283	GRM8
All_epilepsy	ENSG00000135740	16	67271586	67306093	20	3	67282	1.9898	0.023304	SLC9A5
All_epilepsy	ENSG00000105607	19	13001840	13025021	18	2	69473	1.9893	0.023332	GCDH
All_epilepsy	ENSG00000158050	2	96808905	96811179	1	1	71185	1.9892	0.02334	DUSP2
All_epilepsy	ENSG00000197790	11	4566421	4567374	4	2	68711	1.9888	0.023362	OR52M1
All_epilepsy	ENSG00000168546	8	21547915	21669869	13	3	69253	1.9883	0.023389	GFRA2
All_epilepsy	ENSG00000183291	1	87328132	87380107	120	10	64182	1.9881	0.0234	2015-09-01
All_epilepsy	ENSG00000043143	5	133860003	133918918	108	19	69389	1.9875	0.023431	JADE2
All_epilepsy	ENSG00000166509	16	78056412	78100658	318	18	69743	1.9873	0.023443	CLEC3A
All_epilepsy	ENSG00000155714	16	21995186	22012433	7	2	68859	1.9873	0.023446	PDZD9
All_epilepsy	ENSG00000165462	11	71950121	71956708	4	1	64204	1.9871	0.023456	PHOX2A
All_epilepsy	ENSG00000168060	11	64812290	64826021	7	2	70503	1.9865	0.023488	NAALADL1
All_epilepsy	ENSG00000183273	12	119772517	119978852	364	54	69657	1.9862	0.023505	CCDC60
All_epilepsy	ENSG00000163634	3	63819546	63849579	39	10	63299	1.9861	0.02351	THOC7
All_epilepsy	ENSG00000075234	22	46663858	46689905	63	5	66210	1.9853	0.023553	TTC38
All_epilepsy	ENSG00000129625	5	112212084	112258236	118	10	68456	1.9846	0.023593	REEP5
All_epilepsy	ENSG00000172938	11	68747490	68748455	1	1	69104	1.9831	0.02368	MRGPRD
All_epilepsy	ENSG00000267596	17	34323476	34329084	13	4	67396	1.983	0.023683	CCL15
All_epilepsy	ENSG00000198792	22	38615298	38669040	65	8	70128	1.9823	0.023722	TMEM184B
All_epilepsy	ENSG00000166143	15	41107650	41120907	19	4	68105	1.982	0.023741	PPP1R14D
All_epilepsy	ENSG00000104518	8	144635377	144645232	19	5	67825	1.9812	0.023782	GSDMD
All_epilepsy	ENSG00000175779	15	38988799	38992239	17	4	69773	1.9808	0.023806	C15orf53
All_epilepsy	ENSG00000103591	15	67493371	67547533	77	5	70913	1.9807	0.023812	AAGAB
All_epilepsy	ENSG00000018510	2	178257372	178408564	219	10	70702	1.9802	0.023839	AGPS
All_epilepsy	ENSG00000149273	11	75110530	75133324	21	5	69814	1.9802	0.023839	RPS3
All_epilepsy	ENSG00000163395	1	201159953	201198080	93	18	69491	1.9797	0.02387	IGFN1
All_epilepsy	ENSG00000100479	14	50110273	50155140	65	4	70281	1.9787	0.023927	POLE2
All_epilepsy	ENSG00000186951	22	46546424	46639653	79	12	68266	1.9782	0.023953	PPARA
All_epilepsy	ENSG00000011590	19	36195429	36207940	17	5	70196	1.977	0.024018	ZBTB32
All_epilepsy	ENSG00000073150	22	50609160	50618723	10	4	67899	1.9767	0.02404	PANX2
All_epilepsy	ENSG00000152127	2	134877554	135212192	475	79	68835	1.9759	0.024082	MGAT5
All_epilepsy	ENSG00000187546	7	15239943	15601640	725	80	69425	1.9758	0.024087	AGMO
All_epilepsy	ENSG00000162267	3	52828784	52843025	12	3	70506	1.9755	0.024108	ITIH3
All_epilepsy	ENSG00000163527	3	31574130	31679112	122	12	68866	1.9754	0.024109	STT3B
All_epilepsy	ENSG00000204060	1	41827594	41849262	28	8	69647	1.9753	0.024118	FOXO6
All_epilepsy	ENSG00000179397	1	244617679	244804479	374	19	68736	1.9752	0.024122	C1orf101
All_epilepsy	ENSG00000103056	16	68392231	68482591	115	14	70071	1.9751	0.024131	SMPD3
All_epilepsy	ENSG00000106780	9	123363091	123476748	61	3	70272	1.9745	0.024162	MEGF9
All_epilepsy	ENSG00000204947	7	148799876	148823438	33	3	70597	1.9736	0.024211	ZNF425
All_epilepsy	ENSG00000157483	15	59427113	59665099	474	59	69010	1.9729	0.024253	MYO1E
All_epilepsy	ENSG00000109927	11	120971882	121062202	199	15	70106	1.9728	0.02426	TECTA
All_epilepsy	ENSG00000110717	11	67798084	67804111	5	1	69600	1.9718	0.024316	NDUFS8
All_epilepsy	ENSG00000137166	6	41514164	41570122	38	4	69305	1.9712	0.02435	FOXP4
All_epilepsy	ENSG00000011021	1	11866207	11903201	163	13	69393	1.9709	0.024368	CLCN6
All_epilepsy	ENSG00000168621	5	37812779	37839788	63	14	69783	1.9704	0.024394	GDNF
All_epilepsy	ENSG00000110375	11	118795873	118829269	39	7	67044	1.9696	0.024443	UPK2
All_epilepsy	ENSG00000113722	5	149546358	149564120	21	4	69722	1.9691	0.024473	CDX1
All_epilepsy	ENSG00000107651	10	121652223	121702014	139	9	69428	1.9682	0.024521	SEC23IP
All_epilepsy	ENSG00000214944	5	72921983	73237818	612	76	68723	1.9681	0.024529	ARHGEF28
All_epilepsy	ENSG00000167098	20	31571579	31592239	79	6	69894	1.9675	0.024562	SUN5
All_epilepsy	ENSG00000179630	13	44453420	44468068	42	9	69250	1.967	0.024591	LACC1
All_epilepsy	ENSG00000087301	14	52897308	53019240	223	18	70600	1.9668	0.024605	TXNDC16
All_epilepsy	ENSG00000149782	11	64018995	64036622	17	6	69930	1.9667	0.024607	PLCB3
All_epilepsy	ENSG00000167604	19	36378555	36393205	8	2	66043	1.9666	0.024614	NFKBID
All_epilepsy	ENSG00000110844	12	49962001	50038449	56	5	69270	1.9663	0.024635	PRPF40B
All_epilepsy	ENSG00000121440	3	73431584	73674091	375	54	69855	1.9659	0.024656	PDZRN3
All_epilepsy	ENSG00000111275	12	112204691	112247782	29	4	70742	1.9657	0.024664	ALDH2
All_epilepsy	ENSG00000164329	5	78907943	78982471	74	8	70744	1.9649	0.024714	PAPD4
All_epilepsy	ENSG00000103024	16	1820287	1821731	1	1	67458	1.9644	0.02474	NME3
All_epilepsy	ENSG00000143375	1	151482986	151511168	21	4	69397	1.9641	0.024762	CGN
All_epilepsy	ENSG00000134758	18	29671818	29711524	61	9	69554	1.9631	0.024818	RNF138
All_epilepsy	ENSG00000105647	19	18263928	18281350	9	2	67923	1.9629	0.024827	PIK3R2
All_epilepsy	ENSG00000204568	6	30585486	30594172	3	1	59613	1.9628	0.024834	MRPS18B
All_epilepsy	ENSG00000205155	19	36236015	36237911	2	1	69945	1.9627	0.024839	PSENEN
All_epilepsy	ENSG00000173064	12	112597992	112819896	173	16	68668	1.9622	0.024867	HECTD4
All_epilepsy	ENSG00000092853	1	36185819	36235568	37	5	70082	1.962	0.024881	CLSPN
All_epilepsy	ENSG00000002746	7	43152198	43605600	989	130	69496	1.962	0.024883	HECW1
All_epilepsy	ENSG00000162129	11	72003469	72145692	147	13	67533	1.9619	0.024886	CLPB
All_epilepsy	ENSG00000078795	5	137223657	137278436	56	8	70185	1.9616	0.024905	PKD2L2
All_epilepsy	ENSG00000113073	5	139739787	139754728	9	2	71049	1.9614	0.024918	SLC4A9
All_epilepsy	ENSG00000162734	1	160175127	160185166	1	1	70685	1.961	0.02494	PEA15
All_epilepsy	ENSG00000161270	19	36316866	36360189	22	2	66479	1.9607	0.024956	NPHS1
All_epilepsy	ENSG00000075624	7	5566782	5603415	11	3	68121	1.9606	0.024964	ACTB
All_epilepsy	ENSG00000069956	15	52244303	52358462	65	7	68438	1.9601	0.02499	MAPK6
All_epilepsy	ENSG00000187134	10	4934796	5025475	176	19	69631	1.9599	0.025001	AKR1C1
All_epilepsy	ENSG00000110906	12	109886461	109915349	109	9	69256	1.9592	0.025048	KCTD10
All_epilepsy	ENSG00000111596	12	70636774	70748773	267	23	66507	1.9587	0.025073	CNOT2
All_epilepsy	ENSG00000175471	5	94039446	94620279	871	127	69318	1.9583	0.025098	MCTP1
All_epilepsy	ENSG00000185420	1	245912642	246670614	2105	103	69224	1.958	0.025115	SMYD3
All_epilepsy	ENSG00000204052	6	43474707	43478424	1	1	69369	1.9572	0.02516	LRRC73
All_epilepsy	ENSG00000114023	3	122103023	122131181	63	10	69428	1.957	0.025176	FAM162A
All_epilepsy	ENSG00000197153	6	27858093	27860884	4	2	70449	1.9565	0.025201	HIST1H3J
All_epilepsy	ENSG00000102890	16	67233014	67237932	5	2	67736	1.9558	0.025242	ELMO3
All_epilepsy	ENSG00000142046	19	41856816	41889988	45	5	69593	1.9556	0.025253	TMEM91
All_epilepsy	ENSG00000204977	13	50570024	50594617	36	6	69902	1.9555	0.025261	TRIM13
All_epilepsy	ENSG00000108448	17	18601311	18639431	15	3	69276	1.9554	0.02527	TRIM16L
All_epilepsy	ENSG00000243056	5	139927251	139929163	2	1	71341	1.9553	0.025275	EIF4EBP3
All_epilepsy	ENSG00000154479	2	170501935	170550943	172	10	70750	1.9539	0.025359	CCDC173
All_epilepsy	ENSG00000114316	3	49315264	49378145	51	6	70199	1.9536	0.025376	USP4
All_epilepsy	ENSG00000204882	8	142366600	142377367	4	1	68380	1.9531	0.025404	GPR20
All_epilepsy	ENSG00000129518	14	34985135	35008916	60	8	69678	1.9527	0.025427	EAPP
All_epilepsy	ENSG00000197980	3	156543270	156763918	495	31	68170	1.9514	0.025504	LEKR1
All_epilepsy	ENSG00000084693	2	27265232	27293490	19	2	71008	1.9514	0.025506	AGBL5
All_epilepsy	ENSG00000109452	4	142944313	143768585	1770	122	69553	1.951	0.025527	INPP4B
All_epilepsy	ENSG00000160200	21	44473301	44497053	38	7	68743	1.9509	0.025533	CBS
All_epilepsy	ENSG00000131374	3	17198654	18486309	1926	75	69159	1.9508	0.025538	TBC1D5
All_epilepsy	ENSG00000165816	10	115999018	116051272	66	8	69639	1.9503	0.025568	VWA2
All_epilepsy	ENSG00000105854	7	95034175	95064510	75	10	69589	1.9503	0.025572	PON2
All_epilepsy	ENSG00000164334	5	118965254	118971517	23	3	71231	1.9502	0.025574	FAM170A
All_epilepsy	ENSG00000141384	18	23805900	23971649	326	27	69406	1.9494	0.025625	TAF4B
All_epilepsy	ENSG00000115694	2	242432089	242449145	32	7	69380	1.9488	0.025659	STK25
All_epilepsy	ENSG00000162771	1	212797789	212800120	8	4	66651	1.948	0.025705	FAM71A
All_epilepsy	ENSG00000186377	1	47427036	47516423	87	9	68837	1.9476	0.025731	CYP4X1
All_epilepsy	ENSG00000171867	20	4666882	4682236	6	2	68255	1.9464	0.025804	PRNP
All_epilepsy	ENSG00000152952	3	145787227	145881440	221	11	70054	1.9458	0.025837	PLOD2
All_epilepsy	ENSG00000019144	11	118477155	118528741	39	6	69800	1.9454	0.025862	PHLDB1
All_epilepsy	ENSG00000071539	5	892758	919472	29	3	64748	1.9437	0.025968	TRIP13
All_epilepsy	ENSG00000140522	15	89753100	89764982	18	4	69181	1.9427	0.026028	RLBP1
All_epilepsy	ENSG00000225921	6	13615559	13632971	12	2	70144	1.9421	0.026062	NOL7
All_epilepsy	ENSG00000175535	10	118305443	118327367	24	4	67935	1.9418	0.026082	PNLIP
All_epilepsy	ENSG00000055332	2	37326353	37384208	91	13	66864	1.9409	0.026136	EIF2AK2
All_epilepsy	ENSG00000064012	2	202098166	202152434	126	19	67773	1.9396	0.026215	CASP8
All_epilepsy	ENSG00000204183	20	34020827	34023248	4	1	70555	1.9394	0.026226	GDF5OS
All_epilepsy	ENSG00000088451	13	95226308	95248511	33	3	70896	1.9392	0.026238	TGDS
All_epilepsy	ENSG00000163519	3	108541545	108573852	49	7	69712	1.9385	0.026283	TRAT1
All_epilepsy	ENSG00000186510	1	16345370	16360545	55	10	68745	1.9376	0.026335	CLCNKA
All_epilepsy	ENSG00000048162	5	175810949	175815976	6	1	68507	1.9365	0.026404	NOP16
All_epilepsy	ENSG00000058866	3	185823457	186080026	263	41	69442	1.9355	0.026463	DGKG
All_epilepsy	ENSG00000144152	2	112895962	112945791	76	15	68154	1.9349	0.026501	FBLN7
All_epilepsy	ENSG00000119917	10	91087651	91100728	58	7	65953	1.9348	0.026508	IFIT3
All_epilepsy	ENSG00000139433	12	110288748	110318293	53	8	69635	1.9345	0.026526	GLTP
All_epilepsy	ENSG00000183798	20	39988606	39995467	16	6	67139	1.9338	0.026569	EMILIN3
All_epilepsy	ENSG00000111783	12	106976685	107156581	284	25	69176	1.9338	0.026571	RFX4
All_epilepsy	ENSG00000161860	19	13009600	13030090	14	2	69959	1.9327	0.026636	SYCE2
All_epilepsy	ENSG00000136052	12	105196331	105352522	315	25	69433	1.9325	0.026647	SLC41A2
All_epilepsy	ENSG00000106443	7	11013499	11209250	338	21	68123	1.931	0.026741	PHF14
All_epilepsy	ENSG00000120820	12	104382762	104457961	176	29	68836	1.9297	0.026824	GLT8D2
All_epilepsy	ENSG00000255823	11	10529434	10530723	4	2	65619	1.9289	0.026874	MTRNR2L8
All_epilepsy	ENSG00000131370	3	15296360	15382875	132	23	68579	1.928	0.026927	SH3BP5
All_epilepsy	ENSG00000163462	1	155145873	155157447	3	1	69924	1.9264	0.027028	TRIM46
All_epilepsy	ENSG00000108515	17	4851387	4860426	6	3	69817	1.9256	0.02708	ENO3
All_epilepsy	ENSG00000065361	12	56473641	56497289	14	3	67846	1.9254	0.027088	ERBB3
All_epilepsy	ENSG00000214681	3	51907737	51909600	1	1	65950	1.9252	0.0271	IQCF5
All_epilepsy	ENSG00000143469	1	210111538	210337636	274	17	65734	1.9252	0.027103	SYT14
All_epilepsy	ENSG00000174325	2	189598882	189654831	130	8	67572	1.9252	0.027104	DIRC1
All_epilepsy	ENSG00000070182	14	65213002	65346601	361	47	69771	1.9249	0.02712	SPTB
All_epilepsy	ENSG00000145423	4	154701744	154710272	9	3	69663	1.9233	0.02722	SFRP2
All_epilepsy	ENSG00000149798	11	65082289	65089900	5	2	67775	1.9224	0.027275	CDC42EP2
All_epilepsy	ENSG00000169302	5	146614526	146767415	426	40	70093	1.9217	0.027321	STK32A
All_epilepsy	ENSG00000165525	14	50249997	50319921	4	1	65507	1.9215	0.027333	NEMF
All_epilepsy	ENSG00000124570	6	2948393	2972090	73	11	67474	1.9214	0.027342	SERPINB6
All_epilepsy	ENSG00000135503	12	52345451	52390862	32	4	68465	1.9213	0.027345	ACVR1B
All_epilepsy	ENSG00000111540	12	56367697	56388490	29	4	68213	1.9213	0.027349	RAB5B
All_epilepsy	ENSG00000149043	11	1848709	1858751	7	2	68480	1.9212	0.027354	SYT8
All_epilepsy	ENSG00000061273	12	48176505	48226915	53	12	66548	1.9211	0.02736	HDAC7
All_epilepsy	ENSG00000250588	3	158680024	159615155	1216	104	70078	1.9207	0.027385	IQCJ-SCHIP1
All_epilepsy	ENSG00000135519	12	49932940	49952091	23	2	69948	1.9199	0.027435	KCNH3
All_epilepsy	ENSG00000179029	17	8076555	8079717	8	3	68364	1.9198	0.027443	TMEM107
All_epilepsy	ENSG00000076351	17	26721661	26734215	2	1	69339	1.9197	0.02745	SLC46A1
All_epilepsy	ENSG00000167580	12	50344524	50352664	16	4	68383	1.9192	0.027478	AQP2
All_epilepsy	ENSG00000142484	17	4675179	4686506	6	1	69714	1.9183	0.027535	TM4SF5
All_epilepsy	ENSG00000110801	12	122326637	122356203	55	8	70232	1.918	0.027556	PSMD9
All_epilepsy	ENSG00000108510	17	60019966	60142643	84	7	70269	1.9179	0.027561	MED13
All_epilepsy	ENSG00000054282	1	243419320	243663394	253	27	70049	1.917	0.02762	SDCCAG8
All_epilepsy	ENSG00000120158	9	4792869	4885917	181	22	69533	1.9169	0.027623	RCL1
All_epilepsy	ENSG00000126858	17	30469473	30580393	73	4	70464	1.9168	0.027633	RHOT1
All_epilepsy	ENSG00000186017	19	36936021	36980804	82	8	70674	1.9164	0.027655	ZNF566
All_epilepsy	ENSG00000130300	19	17462257	17488159	7	2	69214	1.9164	0.027659	PLVAP
All_epilepsy	ENSG00000055070	1	16679070	16724640	67	7	69368	1.9162	0.027669	SZRD1
All_epilepsy	ENSG00000140451	15	65107831	65117867	17	4	67414	1.9154	0.02772	PIF1
All_epilepsy	ENSG00000080822	3	98216756	98241910	32	6	70777	1.9152	0.027734	CLDND1
All_epilepsy	ENSG00000110719	11	67806483	67818362	10	3	68324	1.9151	0.027743	TCIRG1
All_epilepsy	ENSG00000131504	5	140894583	140998622	130	20	69270	1.9147	0.027765	DIAPH1
All_epilepsy	ENSG00000166140	15	41099284	41106767	18	4	68888	1.9143	0.027793	ZFYVE19
All_epilepsy	ENSG00000165072	9	72658497	72841886	92	8	70823	1.9143	0.027794	MAMDC2
All_epilepsy	ENSG00000158113	12	122652285	122688018	26	5	70081	1.9142	0.027798	LRRC43
All_epilepsy	ENSG00000187778	12	49950327	49961936	10	2	69752	1.9129	0.027882	MCRS1
All_epilepsy	ENSG00000134001	14	67826714	67853233	60	10	67347	1.9126	0.027899	EIF2S1
All_epilepsy	ENSG00000155438	2	122484521	122494499	19	2	69186	1.9121	0.027934	NIFK
All_epilepsy	ENSG00000168389	1	40420802	40435638	3	1	67858	1.9114	0.027977	MFSD2A
All_epilepsy	ENSG00000197056	1	35525387	35581460	49	6	68002	1.911	0.028001	ZMYM1
All_epilepsy	ENSG00000254726	1	156041804	156051789	6	2	69426	1.9105	0.028038	MEX3A
All_epilepsy	ENSG00000127152	14	99635624	99737861	104	16	69170	1.9102	0.028054	BCL11B
All_epilepsy	ENSG00000003987	8	17155539	17271037	313	39	69700	1.9091	0.028122	MTMR7
All_epilepsy	ENSG00000125633	2	118673054	118771709	240	21	69968	1.909	0.028134	CCDC93
All_epilepsy	ENSG00000049192	5	64444563	64777747	557	53	69920	1.909	0.028134	ADAMTS6
All_epilepsy	ENSG00000128274	22	43088127	43117304	104	15	69269	1.9089	0.028137	A4GALT
All_epilepsy	ENSG00000003056	12	9092959	9102551	16	4	70153	1.9087	0.02815	M6PR
All_epilepsy	ENSG00000129515	14	35030300	35099389	126	11	69334	1.9086	0.028155	SNX6
All_epilepsy	ENSG00000103091	16	74907468	75034071	151	20	69426	1.9081	0.028188	WDR59
All_epilepsy	ENSG00000141219	17	71228372	71245091	61	2	70806	1.9075	0.028225	C17orf80
All_epilepsy	ENSG00000142178	21	44834395	44847008	1	1	63794	1.9069	0.02827	SIK1
All_epilepsy	ENSG00000092203	14	21944756	21967319	49	6	70796	1.9062	0.028311	TOX4
All_epilepsy	ENSG00000007314	17	62015914	62050278	10	3	68979	1.9053	0.02837	SCN4A
All_epilepsy	ENSG00000220205	17	8062467	8066864	5	1	70479	1.9044	0.028428	VAMP2
All_epilepsy	ENSG00000132436	7	50511831	50518088	10	3	70674	1.9042	0.028442	FIGNL1
All_epilepsy	ENSG00000185873	4	69092371	69111438	9	1	68898	1.9039	0.028465	TMPRSS11B
All_epilepsy	ENSG00000178209	8	144989321	145050902	8	2	70077	1.9033	0.028504	PLEC
All_epilepsy	ENSG00000154478	10	125425871	125454123	56	15	68507	1.903	0.028522	GPR26
All_epilepsy	ENSG00000197157	7	127292234	127732661	467	33	69863	1.9029	0.028526	SND1
All_epilepsy	ENSG00000133110	13	38136720	38172981	71	10	70668	1.9025	0.028555	POSTN
All_epilepsy	ENSG00000165526	11	126071993	126081587	21	5	70115	1.9023	0.028569	RPUSD4
All_epilepsy	ENSG00000163644	4	89178772	89205921	20	3	67814	1.9018	0.028597	PPM1K
All_epilepsy	ENSG00000136108	13	53029564	53050763	42	6	67278	1.9017	0.028607	CKAP2
All_epilepsy	ENSG00000115091	2	114647537	114720173	196	17	69280	1.9008	0.028661	ACTR3
All_epilepsy	ENSG00000124227	20	56793551	56803709	10	3	69777	1.9007	0.02867	ANKRD60
All_epilepsy	ENSG00000105428	19	5455426	5456867	5	1	69622	1.9005	0.028681	ZNRF4
All_epilepsy	ENSG00000120458	11	124636394	124670569	33	6	69649	1.9	0.028716	MSANTD2
All_epilepsy	ENSG00000132485	1	71528974	71546980	23	6	69622	1.8999	0.028723	ZRANB2
All_epilepsy	ENSG00000165807	14	65016620	65056098	92	14	69655	1.8987	0.028804	PPP1R36
All_epilepsy	ENSG00000116062	2	47922669	48037240	144	18	69071	1.8984	0.028821	MSH6
All_epilepsy	ENSG00000146147	6	53794780	54131078	569	52	70492	1.8984	0.028822	MLIP
All_epilepsy	ENSG00000160796	3	47021173	47051193	33	5	68945	1.8982	0.028835	NBEAL2
All_epilepsy	ENSG00000109576	4	170981373	171012850	62	11	67532	1.8982	0.028836	AADAT
All_epilepsy	ENSG00000089280	16	31191431	31203127	2	1	70644	1.8977	0.02887	FUS
All_epilepsy	ENSG00000155011	4	107842959	108204963	497	66	69068	1.8976	0.028877	DKK2
All_epilepsy	ENSG00000130787	12	123319000	123347507	63	5	68604	1.8975	0.02888	HIP1R
All_epilepsy	ENSG00000112530	6	163148164	163736524	1302	124	69929	1.8972	0.028898	PACRG
All_epilepsy	ENSG00000001617	3	50192478	50226508	45	8	69003	1.8964	0.028952	SEMA3F
All_epilepsy	ENSG00000240230	7	938415	1015235	10	3	67492	1.8962	0.028967	COX19
All_epilepsy	ENSG00000140443	15	99192200	99507759	448	63	68735	1.895	0.029048	IGF1R
All_epilepsy	ENSG00000092929	17	73823306	73840798	25	3	69028	1.8946	0.029074	UNC13D
All_epilepsy	ENSG00000177721	5	43039335	43043272	3	1	64490	1.8943	0.029094	ANXA2R
All_epilepsy	ENSG00000196865	10	115614420	115676953	23	4	70697	1.8937	0.02913	NHLRC2
All_epilepsy	ENSG00000178913	5	140698057	140700330	5	2	69882	1.8933	0.029156	TAF7
All_epilepsy	ENSG00000111058	12	81331594	81650533	827	63	69323	1.8932	0.029165	ACSS3
All_epilepsy	ENSG00000112218	6	97242002	97285353	93	11	69417	1.893	0.029176	GPR63
All_epilepsy	ENSG00000213918	16	3661729	3730144	100	7	68869	1.8929	0.029184	DNASE1
All_epilepsy	ENSG00000104728	8	1772142	1906807	174	36	67704	1.8927	0.029202	ARHGEF10
All_epilepsy	ENSG00000165322	10	32094365	32217742	160	11	70351	1.8907	0.029334	ARHGAP12
All_epilepsy	ENSG00000127362	7	141463897	141464997	2	1	70973	1.8902	0.029364	TAS2R3
All_epilepsy	ENSG00000178904	19	32896449	32976801	111	13	69823	1.89	0.029379	DPY19L3
All_epilepsy	ENSG00000103064	16	68298433	68335722	35	7	68621	1.8898	0.02939	SLC7A6
All_epilepsy	ENSG00000145936	5	169801675	169816681	53	8	70439	1.8897	0.029399	KCNMB1
All_epilepsy	ENSG00000135624	2	73460548	73480149	30	6	68871	1.8895	0.029415	CCT7
All_epilepsy	ENSG00000106560	7	150382785	150390729	14	5	70366	1.8893	0.029428	GIMAP2
All_epilepsy	ENSG00000175520	11	5528530	5531215	1	1	71142	1.8891	0.02944	UBQLN3
All_epilepsy	ENSG00000095066	19	12873817	12983554	51	4	69251	1.8888	0.029462	HOOK2
All_epilepsy	ENSG00000059377	7	139476850	139720125	252	37	70030	1.8886	0.029472	TBXAS1
All_epilepsy	ENSG00000160818	1	156564279	156571288	29	2	69160	1.8883	0.029491	GPATCH4
All_epilepsy	ENSG00000243244	2	48756522	48826025	181	18	68887	1.8881	0.029506	STON1
All_epilepsy	ENSG00000147649	8	98656407	98740998	103	10	70575	1.8872	0.029567	MTDH
All_epilepsy	ENSG00000159958	22	42321045	42322822	5	2	69489	1.8863	0.02963	TNFRSF13C
All_epilepsy	ENSG00000107864	10	93806449	94050844	198	17	70523	1.8862	0.029636	CPEB3
All_epilepsy	ENSG00000101230	20	13202418	13281298	156	19	68238	1.8858	0.029664	ISM1
All_epilepsy	ENSG00000243232	5	140345820	140391936	10	5	61596	1.8851	0.029706	PCDHAC2
All_epilepsy	ENSG00000197182	22	46449749	46509808	42	4	68424	1.885	0.029715	FLJ27365
All_epilepsy	ENSG00000157184	1	53662101	53679869	12	2	69104	1.8846	0.029745	CPT2
All_epilepsy	ENSG00000204435	6	31633013	31638120	13	6	68999	1.8834	0.029822	CSNK2B
All_epilepsy	ENSG00000144229	2	137523115	138435287	2044	159	69266	1.8828	0.029862	THSD7B
All_epilepsy	ENSG00000179934	3	39371197	39375171	2	1	67398	1.8827	0.029871	CCR8
All_epilepsy	ENSG00000164086	3	52082935	52090566	3	2	70904	1.8822	0.029902	DUSP7
All_epilepsy	ENSG00000075275	22	46756731	46933067	231	33	68606	1.8819	0.029924	CELSR1
All_epilepsy	ENSG00000214706	3	50325163	50330349	1	1	71319	1.8814	0.02996	IFRD2
All_epilepsy	ENSG00000262003	17	812872	814452	3	1	69731	1.881	0.029989	RP11-676J12.7
All_epilepsy	ENSG00000165813	10	115880621	115933979	80	8	68842	1.8805	0.030022	C10orf118
All_epilepsy	ENSG00000063169	19	48111453	48206533	194	19	70213	1.8805	0.030023	GLTSCR1
All_epilepsy	ENSG00000114742	3	39093489	39138155	109	17	69215	1.88	0.030051	WDR48
All_epilepsy	ENSG00000112029	6	153291664	153304714	34	5	70827	1.88	0.030053	FBXO5
All_epilepsy	ENSG00000162627	1	99127236	99226056	229	16	70650	1.8799	0.030064	SNX7
All_epilepsy	ENSG00000186635	11	72396114	72504644	215	23	70125	1.8797	0.030075	ARAP1
All_epilepsy	ENSG00000005108	7	11409984	11871824	1279	121	69775	1.8797	0.030077	THSD7A
All_epilepsy	ENSG00000101019	20	33890369	33999944	130	6	69832	1.8792	0.03011	UQCC1
All_epilepsy	ENSG00000089012	20	1609798	1638425	86	14	68743	1.8791	0.030117	SIRPG
All_epilepsy	ENSG00000253159	5	140810185	140892546	171	23	69044	1.8788	0.030139	PCDHGA12
All_epilepsy	ENSG00000161921	17	4636821	4643217	15	2	69930	1.8781	0.030185	CXCL16
All_epilepsy	ENSG00000119446	9	124999903	125027118	36	4	69444	1.8777	0.030208	RBM18
All_epilepsy	ENSG00000159588	1	46085716	46089729	8	2	70955	1.8776	0.030215	CCDC17
All_epilepsy	ENSG00000241186	3	46616045	46668033	181	21	68633	1.8775	0.030225	TDGF1
All_epilepsy	ENSG00000197601	11	13690217	13753893	65	10	68776	1.8765	0.030294	FAR1
All_epilepsy	ENSG00000157827	2	153191751	153506348	742	79	69917	1.8763	0.030306	FMNL2
All_epilepsy	ENSG00000128607	7	129710350	129775560	94	7	69974	1.876	0.030328	KLHDC10
All_epilepsy	ENSG00000101596	18	2655737	2805015	327	17	70003	1.8757	0.030348	SMCHD1
All_epilepsy	ENSG00000105613	19	12944765	12985765	47	4	69388	1.8756	0.030356	MAST1
All_epilepsy	ENSG00000161328	11	537527	554916	13	4	66343	1.8755	0.030362	LRRC56
All_epilepsy	ENSG00000113391	5	92953775	93447404	398	18	69905	1.8744	0.03044	FAM172A
All_epilepsy	ENSG00000165501	14	50065415	50081390	35	4	70756	1.8742	0.030449	LRR1
All_epilepsy	ENSG00000204640	2	101086944	101099742	49	5	69684	1.874	0.030463	NMS
All_epilepsy	ENSG00000269067	19	23158270	23185978	52	3	70696	1.8738	0.030482	ZNF728
All_epilepsy	ENSG00000157388	3	53528683	53847760	459	73	69634	1.873	0.030531	CACNA1D
All_epilepsy	ENSG00000183098	13	93879095	95059655	2132	179	70111	1.8728	0.03055	GPC6
All_epilepsy	ENSG00000188807	1	9648932	9674935	19	3	68882	1.8722	0.030593	TMEM201
All_epilepsy	ENSG00000112851	5	65222303	65378377	91	7	68612	1.8719	0.03061	ERBB2IP
All_epilepsy	ENSG00000112494	6	167684657	167729507	126	19	69689	1.8709	0.030681	UNC93A
All_epilepsy	ENSG00000205476	14	99977603	100070363	120	4	70320	1.8703	0.030722	CCDC85C
All_epilepsy	ENSG00000155660	7	148700154	148725733	45	4	68778	1.87	0.030742	PDIA4
All_epilepsy	ENSG00000134779	18	34359987	34409158	70	5	69318	1.8695	0.03078	TPGS2
All_epilepsy	ENSG00000165502	14	50085237	50087403	6	2	70873	1.8693	0.03079	RPL36AL
All_epilepsy	ENSG00000065559	17	11924141	12047147	108	7	70925	1.8688	0.030829	MAP2K4
All_epilepsy	ENSG00000156486	8	99439250	99445076	1	1	69824	1.8687	0.03083	KCNS2
All_epilepsy	ENSG00000178297	19	2389769	2426237	63	5	69108	1.868	0.03088	TMPRSS9
All_epilepsy	ENSG00000136807	9	130547958	130553066	6	2	67213	1.8678	0.030896	CDK9
All_epilepsy	ENSG00000184886	17	34890847	34895159	2	1	69819	1.8675	0.030918	PIGW
All_epilepsy	ENSG00000171806	1	169761670	169764107	4	2	71161	1.8662	0.031006	METTL18
All_epilepsy	ENSG00000136280	7	45039074	45116068	201	14	69941	1.8647	0.031114	CCM2
All_epilepsy	ENSG00000064419	7	128594948	128695198	157	16	68462	1.8645	0.031128	TNPO3
All_epilepsy	ENSG00000172215	3	45982425	45989845	13	4	69549	1.8643	0.03114	CXCR6
All_epilepsy	ENSG00000187123	2	150186499	150330662	200	18	70091	1.8639	0.031167	LYPD6
All_epilepsy	ENSG00000100036	22	31031639	31065003	99	19	67311	1.8621	0.031298	SLC35E4
All_epilepsy	ENSG00000165935	12	27619743	27655118	156	9	67719	1.8619	0.031311	SMCO2
All_epilepsy	ENSG00000163749	4	77234154	77343021	139	12	70361	1.8616	0.031331	CCDC158
All_epilepsy	ENSG00000090565	16	475619	573011	105	9	69621	1.861	0.031372	RAB11FIP3
All_epilepsy	ENSG00000184985	4	7194265	7744554	973	137	68656	1.8607	0.031392	SORCS2
All_epilepsy	ENSG00000172482	2	241807896	241819919	31	6	69082	1.8605	0.03141	AGXT
All_epilepsy	ENSG00000213339	19	10812106	10824113	17	4	66198	1.8604	0.031414	QTRT1
All_epilepsy	ENSG00000111371	12	46576846	46663800	110	20	69597	1.8603	0.031422	SLC38A1
All_epilepsy	ENSG00000088179	2	120517207	120741394	264	13	67869	1.8602	0.031429	PTPN4
All_epilepsy	ENSG00000213865	8	67579850	67597799	5	2	67340	1.8598	0.031458	C8orf44
All_epilepsy	ENSG00000198369	2	65537985	65659771	199	17	69662	1.8596	0.031471	SPRED2
All_epilepsy	ENSG00000189120	17	45922279	45933240	25	6	70097	1.8596	0.031472	SP6
All_epilepsy	ENSG00000140961	16	83981887	83999937	1	1	67654	1.8592	0.0315	OSGIN1
All_epilepsy	ENSG00000105290	19	36358801	36370693	15	1	68263	1.8592	0.0315	APLP1
All_epilepsy	ENSG00000106608	7	43915493	43966010	108	13	70360	1.8582	0.031571	URGCP
All_epilepsy	ENSG00000171243	7	16501106	16570205	211	29	69799	1.8579	0.03159	SOSTDC1
All_epilepsy	ENSG00000077150	10	104153867	104162281	8	4	68987	1.8579	0.031595	NFKB2
All_epilepsy	ENSG00000112936	5	40909354	40983041	238	27	70466	1.857	0.031656	C7
All_epilepsy	ENSG00000054118	1	36690017	36770958	47	3	69564	1.8569	0.031661	THRAP3
All_epilepsy	ENSG00000184434	9	26993134	27005691	23	6	69697	1.8567	0.031677	LRRC19
All_epilepsy	ENSG00000143318	1	160160285	160171676	4	1	70416	1.8565	0.03169	CASQ1
All_epilepsy	ENSG00000157540	21	38738092	38889753	292	22	69383	1.8565	0.031691	DYRK1A
All_epilepsy	ENSG00000134207	1	114631913	114696541	124	31	69032	1.8553	0.031775	SYT6
All_epilepsy	ENSG00000121897	4	39460620	39479273	54	10	69415	1.8549	0.031802	LIAS
All_epilepsy	ENSG00000198189	4	88257762	88312538	153	18	69170	1.855	0.031802	HSD17B11
All_epilepsy	ENSG00000138688	4	123073488	123283913	206	21	68669	1.8542	0.031853	KIAA1109
All_epilepsy	ENSG00000144426	2	203879602	204091101	209	17	69423	1.8541	0.031865	NBEAL1
All_epilepsy	ENSG00000198553	13	50589390	50595058	11	3	70054	1.8536	0.031899	KCNRG
All_epilepsy	ENSG00000187080	1	248128535	248129641	4	2	69379	1.8534	0.031913	OR2AK2
All_epilepsy	ENSG00000138496	3	122246771	122283424	55	6	71013	1.8532	0.03193	PARP9
All_epilepsy	ENSG00000186318	11	117156402	117186975	45	12	66612	1.8531	0.031934	BACE1
All_epilepsy	ENSG00000197728	12	56435637	56438116	2	1	66929	1.8529	0.031946	RPS26
All_epilepsy	ENSG00000124571	6	43490072	43543812	53	6	67077	1.8529	0.031948	XPO5
All_epilepsy	ENSG00000101444	20	32868074	32899608	24	2	70372	1.8526	0.031968	AHCY
All_epilepsy	ENSG00000154889	18	11882621	11909222	21	4	69543	1.8525	0.031976	MPPE1
All_epilepsy	ENSG00000152705	5	134303596	134347392	18	5	69643	1.8515	0.03205	CATSPER3
All_epilepsy	ENSG00000068697	2	20232411	20251789	33	8	68738	1.8495	0.032196	LAPTM4A
All_epilepsy	ENSG00000175449	5	94982458	95020477	58	9	68934	1.849	0.032231	RFESD
All_epilepsy	ENSG00000135436	12	49976668	49999422	19	3	68558	1.8482	0.032286	FAM186B
All_epilepsy	ENSG00000132970	13	27131840	27263085	312	27	69018	1.8463	0.032421	WASF3
All_epilepsy	ENSG00000166828	16	23194036	23228204	79	8	69925	1.846	0.032445	SCNN1G
All_epilepsy	ENSG00000137936	1	94027347	94312706	681	33	69747	1.8457	0.032469	BCAR3
All_epilepsy	ENSG00000170099	14	94770585	94789731	69	11	68875	1.8454	0.032493	SERPINA6
All_epilepsy	ENSG00000159556	15	76629065	76634817	13	4	70864	1.8448	0.032534	ISL2
All_epilepsy	ENSG00000101311	20	6055492	6104191	167	18	69313	1.844	0.032589	FERMT1
All_epilepsy	ENSG00000151148	12	109915207	109974507	125	15	69081	1.844	0.032595	UBE3B
All_epilepsy	ENSG00000112701	6	76311225	76427997	215	17	70488	1.8437	0.032615	SENP6
All_epilepsy	ENSG00000167106	9	130702858	130742792	59	6	67884	1.8433	0.032643	FAM102A
All_epilepsy	ENSG00000080573	19	10070237	10121147	50	6	68824	1.8429	0.032674	COL5A3
All_epilepsy	ENSG00000051523	16	88709691	88717560	1	1	69474	1.842	0.03274	CYBA
All_epilepsy	ENSG00000101181	20	60758085	60778624	49	8	69958	1.8416	0.032768	MTG2
All_epilepsy	ENSG00000213186	3	160150233	160203561	72	12	68840	1.8414	0.032778	TRIM59
All_epilepsy	ENSG00000176142	3	119148347	119187677	90	11	70812	1.8408	0.032822	TMEM39A
All_epilepsy	ENSG00000178597	4	7432022	7436700	24	6	70573	1.8408	0.032823	PSAPL1
All_epilepsy	ENSG00000163435	1	201977073	201986316	1	1	71091	1.8403	0.03286	ELF3
All_epilepsy	ENSG00000170619	8	146066427	146079121	29	4	69962	1.8403	0.032861	COMMD5
All_epilepsy	ENSG00000181803	14	21108855	21109850	5	1	71076	1.8403	0.032864	OR6S1
All_epilepsy	ENSG00000105698	19	35759881	35770724	20	3	69670	1.8402	0.032867	USF2
All_epilepsy	ENSG00000172301	17	30178883	30186356	7	2	70622	1.8401	0.032879	COPRS
All_epilepsy	ENSG00000160345	9	138387027	138393580	3	1	69322	1.8399	0.032895	C9orf116
All_epilepsy	ENSG00000136487	17	61957578	61959295	1	1	68580	1.8391	0.03295	GH2
All_epilepsy	ENSG00000137038	9	7796490	7888380	180	27	67846	1.8388	0.03297	TMEM261
All_epilepsy	ENSG00000108774	17	40276994	40307035	40	3	70706	1.8387	0.032977	RAB5C
All_epilepsy	ENSG00000176209	8	42396298	42409603	29	4	70363	1.8384	0.032999	SMIM19
All_epilepsy	ENSG00000198464	19	52800430	52829175	30	5	67720	1.8377	0.033053	ZNF480
All_epilepsy	ENSG00000170144	2	178077291	178088686	9	3	69408	1.8368	0.033121	HNRNPA3
All_epilepsy	ENSG00000015475	22	18216906	18257536	40	9	69155	1.8365	0.033145	BID
All_epilepsy	ENSG00000165449	10	61410523	61495760	110	21	68444	1.8362	0.033167	SLC16A9
All_epilepsy	ENSG00000111737	12	120532899	120555306	37	6	68633	1.836	0.033179	RAB35
All_epilepsy	ENSG00000138670	4	82347547	82965397	1304	105	69639	1.8358	0.033196	RASGEF1B
All_epilepsy	ENSG00000125971	20	33104214	33128762	12	2	71130	1.8355	0.033213	DYNLRB1
All_epilepsy	ENSG00000064102	12	27058114	27091259	51	8	69387	1.8353	0.033228	ASUN
All_epilepsy	ENSG00000126870	7	158649269	158749438	213	19	69884	1.835	0.033253	WDR60
All_epilepsy	ENSG00000182326	12	7096351	7178336	3	1	66814	1.8346	0.033279	C1S
All_epilepsy	ENSG00000113810	3	160117062	160152750	49	9	69711	1.8344	0.033301	SMC4
All_epilepsy	ENSG00000166091	14	23846017	23848981	1	1	66272	1.8326	0.03343	CMTM5
All_epilepsy	ENSG00000113070	5	139712428	139726216	19	4	70428	1.8302	0.033611	HBEGF
All_epilepsy	ENSG00000184999	11	62905339	63137190	452	26	67719	1.8283	0.033754	SLC22A10
All_epilepsy	ENSG00000179115	19	13033293	13044851	7	1	70243	1.8281	0.033764	FARSA
All_epilepsy	ENSG00000238243	1	248031277	248060449	39	7	69658	1.8279	0.033783	OR2W3
All_epilepsy	ENSG00000100330	22	30279144	30426855	282	25	70246	1.8275	0.033816	MTMR3
All_epilepsy	ENSG00000196876	12	51984050	52206648	240	19	69482	1.827	0.033852	SCN8A
All_epilepsy	ENSG00000139428	12	109991542	110011679	80	12	69584	1.8268	0.033868	MMAB
All_epilepsy	ENSG00000144362	2	170550975	170558218	7	2	71052	1.8266	0.033882	PHOSPHO2
All_epilepsy	ENSG00000111674	12	7022909	7032861	1	1	70428	1.8263	0.0339	ENO2
All_epilepsy	ENSG00000162873	1	205305220	205326218	59	10	70010	1.8259	0.033933	KLHDC8A
All_epilepsy	ENSG00000182093	21	40752170	40800454	70	6	70000	1.8259	0.033933	WRB
All_epilepsy	ENSG00000186191	20	31667450	31699557	89	9	70159	1.8257	0.033945	BPIFB4
All_epilepsy	ENSG00000205639	2	24232951	24286191	100	17	69604	1.8257	0.033951	MFSD2B
All_epilepsy	ENSG00000143556	1	153430220	153433177	5	2	70814	1.8249	0.034006	S100A7
All_epilepsy	ENSG00000205838	5	34838938	34899561	141	26	68776	1.8248	0.034015	TTC23L
All_epilepsy	ENSG00000103061	16	68318406	68344849	26	5	69181	1.8247	0.034024	SLC7A6OS
All_epilepsy	ENSG00000143171	1	165370159	165414433	147	23	69097	1.8243	0.034057	RXRG
All_epilepsy	ENSG00000005513	16	1031808	1036979	4	1	69178	1.8241	0.034071	SOX8
All_epilepsy	ENSG00000135314	6	73951037	74020088	193	15	69865	1.8239	0.034082	KHDC1
All_epilepsy	ENSG00000135119	12	117176096	117291436	191	27	66666	1.8235	0.034112	RNFT2
All_epilepsy	ENSG00000103222	16	16043434	16236931	422	51	69955	1.8235	0.034114	ABCC1
All_epilepsy	ENSG00000124157	20	43849941	43853099	9	2	70423	1.8231	0.034141	SEMG2
All_epilepsy	ENSG00000182511	15	91426925	91439006	15	2	67864	1.8226	0.034181	FES
All_epilepsy	ENSG00000132517	17	4935895	4955304	54	7	69913	1.8225	0.034192	SLC52A1
All_epilepsy	ENSG00000089060	12	113736564	113797298	48	4	69910	1.8224	0.034194	SLC8B1
All_epilepsy	ENSG00000071909	2	171034655	171511681	833	113	69521	1.8224	0.034199	MYO3B
All_epilepsy	ENSG00000008853	8	22844930	22877712	11	3	69441	1.8214	0.034272	RHOBTB2
All_epilepsy	ENSG00000054654	14	64319683	64693165	743	67	69317	1.8211	0.034294	SYNE2
All_epilepsy	ENSG00000157219	7	154862034	154877459	31	5	70039	1.8208	0.034322	HTR5A
All_epilepsy	ENSG00000137221	6	43445261	43474294	11	2	63134	1.8202	0.034364	TJAP1
All_epilepsy	ENSG00000023734	12	16035325	16056412	7	2	70152	1.8196	0.034412	STRAP
All_epilepsy	ENSG00000112210	6	57053607	57087078	16	3	70636	1.8194	0.034422	RAB23
All_epilepsy	ENSG00000168260	14	50550369	50559361	15	4	67703	1.8192	0.03444	C14orf183
All_epilepsy	ENSG00000155100	8	92082424	92099323	19	3	70439	1.8189	0.034465	OTUD6B
All_epilepsy	ENSG00000160799	3	46963216	47023500	41	4	70454	1.8182	0.034514	CCDC12
All_epilepsy	ENSG00000215305	20	2821349	2847378	55	5	70730	1.8181	0.034527	VPS16
All_epilepsy	ENSG00000144868	3	132757235	133116636	894	72	69817	1.818	0.034534	TMEM108
All_epilepsy	ENSG00000122140	9	138391830	138396519	7	2	69563	1.8178	0.034546	MRPS2
All_epilepsy	ENSG00000136819	9	132589569	132598142	37	2	70788	1.8177	0.034552	C9orf78
All_epilepsy	ENSG00000189410	1	21046225	21059330	28	6	68203	1.8177	0.034553	SH2D5
All_epilepsy	ENSG00000104290	8	28351729	28431775	92	2	70253	1.8177	0.034555	FZD3
All_epilepsy	ENSG00000103035	16	74330673	74340186	6	3	70745	1.8177	0.034556	PSMD7
All_epilepsy	ENSG00000152380	5	79783788	79838382	83	15	67883	1.8176	0.034561	FAM151B
All_epilepsy	ENSG00000124701	6	41021043	41032250	22	3	69691	1.8172	0.034593	APOBEC2
All_epilepsy	ENSG00000090512	3	186353758	186370930	18	4	69003	1.8172	0.034594	FETUB
All_epilepsy	ENSG00000178096	1	149859440	149872351	2	1	65954	1.8166	0.034639	BOLA1
All_epilepsy	ENSG00000197362	7	148766735	148787874	18	2	68947	1.8156	0.034714	ZNF786
All_epilepsy	ENSG00000133639	12	92536286	92539673	8	4	68632	1.8153	0.034737	BTG1
All_epilepsy	ENSG00000140403	15	78556428	78574538	45	9	70686	1.8151	0.034751	DNAJA4
All_epilepsy	ENSG00000172322	12	10103915	10148293	176	20	67712	1.8143	0.034815	CLEC12A
All_epilepsy	ENSG00000139908	14	24674903	24677568	2	1	70708	1.8137	0.034865	TSSK4
All_epilepsy	ENSG00000103599	15	67547138	67794598	286	19	70803	1.8137	0.034866	IQCH
All_epilepsy	ENSG00000068971	11	64685025	64701945	17	3	65697	1.8132	0.034898	PPP2R5B
All_epilepsy	ENSG00000179564	3	50316458	50325545	3	1	71124	1.8124	0.034963	LSMEM2
All_epilepsy	ENSG00000164483	6	130465460	130686570	817	41	69300	1.8122	0.034981	SAMD3
All_epilepsy	ENSG00000077616	11	89864683	89926062	198	11	70086	1.812	0.034994	NAALAD2
All_epilepsy	ENSG00000095787	10	28821422	28912041	121	10	70716	1.8118	0.035008	WAC
All_epilepsy	ENSG00000185674	2	99858709	99871745	18	6	67616	1.811	0.035071	LYG2
All_epilepsy	ENSG00000183813	3	32993066	32997841	7	2	66962	1.8098	0.035163	CCR4
All_epilepsy	ENSG00000145375	4	123844229	124240605	1020	46	67928	1.8094	0.035198	SPATA5
All_epilepsy	ENSG00000166974	18	32556892	32723434	277	35	69655	1.8093	0.035204	MAPRE2
All_epilepsy	ENSG00000168159	1	228674762	228683467	16	5	43758	1.8088	0.035239	RNF187
All_epilepsy	ENSG00000125149	16	67143861	67182442	20	5	67631	1.8085	0.035262	C16orf70
All_epilepsy	ENSG00000116157	1	53068044	53074723	17	5	69366	1.8081	0.035297	GPX7
All_epilepsy	ENSG00000157617	21	43305221	43373999	53	15	69935	1.8081	0.035297	C2CD2
All_epilepsy	ENSG00000129353	19	10713133	10755235	52	5	68910	1.8076	0.035338	SLC44A2
All_epilepsy	ENSG00000075914	3	45016733	45077558	120	11	69802	1.8066	0.035409	EXOSC7
All_epilepsy	ENSG00000158023	12	122355768	122441833	189	19	69353	1.8059	0.035466	WDR66
All_epilepsy	ENSG00000123444	11	47593749	47600567	1	1	71316	1.8057	0.03548	KBTBD4
All_epilepsy	ENSG00000108474	17	16120505	16252115	192	13	69138	1.8056	0.035493	PIGL
All_epilepsy	ENSG00000188827	16	3631182	3661599	69	3	70357	1.8054	0.035509	SLX4
All_epilepsy	ENSG00000168813	19	32836500	32878573	63	11	69468	1.8051	0.03553	ZNF507
All_epilepsy	ENSG00000188710	9	133768815	133769225	1	1	67930	1.8047	0.03556	QRFP
All_epilepsy	ENSG00000196743	5	150591711	150650001	102	17	69615	1.8041	0.035606	GM2A
All_epilepsy	ENSG00000137699	11	119981983	120056237	122	17	68713	1.8037	0.035636	TRIM29
All_epilepsy	ENSG00000229676	19	22817126	22850472	137	5	70662	1.802	0.03577	ZNF492
All_epilepsy	ENSG00000139910	14	26912299	27066960	129	7	70236	1.8015	0.035815	NOVA1
All_epilepsy	ENSG00000136463	17	61678231	61685725	1	1	68654	1.8013	0.03583	TACO1
All_epilepsy	ENSG00000255713	17	56247017	56247940	3	1	66567	1.8004	0.035895	OR4D2
All_epilepsy	ENSG00000166477	15	52230222	52264003	56	5	68070	1.8002	0.035916	LEO1
All_epilepsy	ENSG00000163818	3	45864808	45957534	148	21	69544	1.7997	0.035952	LZTFL1
All_epilepsy	ENSG00000179965	16	30418618	30440920	3	1	67553	1.7996	0.035964	ZNF771
All_epilepsy	ENSG00000249709	19	12636184	12662356	6	1	69321	1.7995	0.035972	ZNF564
All_epilepsy	ENSG00000134323	2	16080686	16087129	5	2	67224	1.799	0.036011	MYCN
All_epilepsy	ENSG00000186866	21	46683843	46707813	41	4	70072	1.7985	0.036052	POFUT2
All_epilepsy	ENSG00000175294	11	65784223	65793988	14	3	69703	1.7984	0.03606	CATSPER1
All_epilepsy	ENSG00000131019	6	150384286	150390231	21	6	70597	1.7981	0.036079	ULBP3
All_epilepsy	ENSG00000179241	11	35965531	36253686	560	74	69682	1.7978	0.036105	LDLRAD3
All_epilepsy	ENSG00000115806	2	171784974	171823639	55	6	69744	1.7976	0.036122	GORASP2
All_epilepsy	ENSG00000164746	7	48075108	48100901	46	5	70173	1.7972	0.036151	C7orf57
All_epilepsy	ENSG00000160401	9	130469268	130478281	4	1	70984	1.7964	0.036217	C9orf117
All_epilepsy	ENSG00000174989	12	117348761	117468953	153	9	68859	1.7963	0.036224	FBXW8
All_epilepsy	ENSG00000121742	13	20796110	20806534	8	2	68758	1.7962	0.036231	GJB6
All_epilepsy	ENSG00000171595	17	72270386	72311023	82	10	69232	1.7961	0.036236	DNAI2
All_epilepsy	ENSG00000181778	9	71151496	71155783	4	2	67815	1.7961	0.036243	TMEM252
All_epilepsy	ENSG00000138271	3	151011891	151034740	54	8	65488	1.7952	0.03631	GPR87
All_epilepsy	ENSG00000214513	2	73429386	73439641	21	3	71201	1.7952	0.036314	NOTO
All_epilepsy	ENSG00000136881	9	104122699	104145801	39	5	69849	1.7943	0.036387	BAAT
All_epilepsy	ENSG00000165092	9	75515578	75695358	196	17	69971	1.7935	0.036445	ALDH1A1
All_epilepsy	ENSG00000112406	6	139456249	139501939	104	10	69170	1.7933	0.036463	HECA
All_epilepsy	ENSG00000160404	9	130493803	130497604	8	2	70140	1.793	0.036487	TOR2A
All_epilepsy	ENSG00000143107	1	109255279	109285365	34	7	68869	1.7928	0.0365	FNDC7
All_epilepsy	ENSG00000106853	9	114312002	114362135	121	24	67643	1.7927	0.036509	PTGR1
All_epilepsy	ENSG00000139618	13	32889611	32973805	124	13	70129	1.7922	0.036547	BRCA2
All_epilepsy	ENSG00000122691	7	19060614	19157295	68	6	63706	1.7917	0.03659	TWIST1
All_epilepsy	ENSG00000029534	8	41510739	41754280	454	66	69350	1.7913	0.036624	ANK1
All_epilepsy	ENSG00000143801	1	227057885	227083806	50	6	69845	1.7908	0.036663	PSEN2
All_epilepsy	ENSG00000183036	21	41239243	41301322	131	26	69473	1.7907	0.036668	PCP4
All_epilepsy	ENSG00000213020	19	53206066	53238326	19	2	70043	1.7907	0.036673	ZNF611
All_epilepsy	ENSG00000112182	6	90636248	91006627	383	50	69643	1.7899	0.036735	BACH2
All_epilepsy	ENSG00000254986	11	66247484	66277130	43	4	70301	1.7899	0.036735	DPP3
All_epilepsy	ENSG00000136908	9	130697378	130700763	5	1	68839	1.7894	0.036773	DPM2
All_epilepsy	ENSG00000204514	19	58360099	58400442	57	7	67663	1.7894	0.036777	ZNF814
All_epilepsy	ENSG00000160593	11	118064455	118095809	78	8	70050	1.7891	0.036799	AMICA1
All_epilepsy	ENSG00000103042	16	58699013	58719008	55	11	69229	1.7888	0.036824	SLC38A7
All_epilepsy	ENSG00000164161	4	145567173	145666423	136	11	69213	1.7881	0.036883	HHIP
All_epilepsy	ENSG00000116329	1	29138654	29190208	105	10	69770	1.7878	0.036903	OPRD1
All_epilepsy	ENSG00000161940	17	6926339	6933609	5	2	68961	1.7876	0.036919	BCL6B
All_epilepsy	ENSG00000101460	20	33134658	33148149	16	3	71019	1.7873	0.036942	MAP1LC3A
All_epilepsy	ENSG00000119523	9	101978708	101984238	7	1	67133	1.7871	0.036958	ALG2
All_epilepsy	ENSG00000108950	17	66531254	66597530	67	11	69356	1.787	0.03697	FAM20A
All_epilepsy	ENSG00000006831	12	1797740	1897844	164	14	69713	1.7864	0.037017	ADIPOR2
All_epilepsy	ENSG00000103966	15	42190950	42264776	130	19	69979	1.7864	0.037019	EHD4
All_epilepsy	ENSG00000166189	10	103825147	103827792	1	1	70477	1.7857	0.03707	HPS6
All_epilepsy	ENSG00000215067	17	6779954	6915668	73	11	69354	1.7841	0.037202	AC027763.2
All_epilepsy	ENSG00000125965	20	34021145	34042568	19	5	68746	1.7837	0.037235	GDF5
All_epilepsy	ENSG00000143466	1	206643791	206670223	15	3	68942	1.7831	0.037287	IKBKE
All_epilepsy	ENSG00000140632	16	4853204	4897343	56	10	68742	1.7826	0.037328	GLYR1
All_epilepsy	ENSG00000237515	16	12995477	13334272	750	88	69297	1.7824	0.03734	SHISA9
All_epilepsy	ENSG00000134152	15	34432875	34502297	190	12	69823	1.7818	0.037391	KATNBL1
All_epilepsy	ENSG00000174871	11	66045661	66052772	6	3	69472	1.7815	0.037412	CNIH2
All_epilepsy	ENSG00000157343	6	35704809	35716856	6	3	69513	1.7814	0.037422	ARMC12
All_epilepsy	ENSG00000262246	16	4404543	4475706	69	7	67754	1.7809	0.037462	CORO7
All_epilepsy	ENSG00000115307	2	74753772	74757066	2	1	71139	1.7803	0.037514	AUP1
All_epilepsy	ENSG00000115145	2	152973315	153032506	102	9	71006	1.7799	0.037545	STAM2
All_epilepsy	ENSG00000204022	10	90346510	90366733	18	4	69151	1.7798	0.037552	LIPJ
All_epilepsy	ENSG00000057757	1	24104895	24114722	2	1	70616	1.7796	0.037568	PITHD1
All_epilepsy	ENSG00000138382	2	170666591	170681441	44	10	68677	1.7794	0.03759	METTL5
All_epilepsy	ENSG00000130803	19	9251056	9274100	71	7	70211	1.7788	0.037632	ZNF317
All_epilepsy	ENSG00000144228	2	139259371	139331117	62	8	68816	1.7781	0.037696	SPOPL
All_epilepsy	ENSG00000100997	20	25275379	25371619	93	10	69309	1.7769	0.037789	ABHD12
All_epilepsy	ENSG00000203993	9	140509784	140513358	1	1	67585	1.7769	0.03779	C9orf37
All_epilepsy	ENSG00000198648	2	168810530	169104651	729	61	70038	1.7769	0.037793	STK39
All_epilepsy	ENSG00000130762	1	3370990	3397677	53	8	68571	1.7766	0.037818	ARHGEF16
All_epilepsy	ENSG00000164574	5	153570290	153800544	584	48	69767	1.7738	0.038046	GALNT10
All_epilepsy	ENSG00000135045	9	77561497	77567802	6	2	69492	1.7735	0.038077	C9orf40
All_epilepsy	ENSG00000062524	15	41795836	41806085	14	4	68444	1.7729	0.038119	LTK
All_epilepsy	ENSG00000165792	14	21457929	21465189	3	1	70711	1.7718	0.038211	METTL17
All_epilepsy	ENSG00000100246	22	39174513	39190203	9	2	69398	1.7716	0.038229	DNAL4
All_epilepsy	ENSG00000158321	7	69063905	70258054	1751	121	69253	1.7708	0.0383	AUTS2
All_epilepsy	ENSG00000115841	2	38150330	38294285	345	28	70106	1.7705	0.038323	RMDN2
All_epilepsy	ENSG00000253873	5	140800762	140891835	190	25	68969	1.7703	0.038341	PCDHGA11
All_epilepsy	ENSG00000114520	3	125165495	125239041	186	17	68679	1.7701	0.038352	SNX4
All_epilepsy	ENSG00000213626	2	30454397	30546596	158	19	69600	1.769	0.038447	LBH
All_epilepsy	ENSG00000156162	8	95731931	95806064	186	21	69873	1.7683	0.038505	DPY19L4
All_epilepsy	ENSG00000100156	22	38474141	38480100	8	3	68267	1.7675	0.038575	SLC16A8
All_epilepsy	ENSG00000162783	1	181057638	181059977	5	2	68408	1.767	0.038614	IER5
All_epilepsy	ENSG00000183775	5	143550396	143865249	430	31	68862	1.7665	0.038654	KCTD16
All_epilepsy	ENSG00000187118	3	28283075	28366633	94	9	70576	1.7662	0.038678	CMC1
All_epilepsy	ENSG00000008282	7	105730949	105753022	31	7	70075	1.7654	0.038748	SYPL1
All_epilepsy	ENSG00000151746	12	32259769	32536567	940	97	70117	1.7653	0.038757	BICD1
All_epilepsy	ENSG00000175414	5	175792471	175828866	29	5	69223	1.7647	0.038805	ARL10
All_epilepsy	ENSG00000183891	2	20096404	20101747	8	2	71280	1.7642	0.038845	TTC32
All_epilepsy	ENSG00000164535	7	6448757	6523821	174	20	67710	1.7639	0.038877	DAGLB
All_epilepsy	ENSG00000083782	12	91357456	91398803	87	8	69325	1.763	0.038949	EPYC
All_epilepsy	ENSG00000088727	3	47269516	47324941	40	5	69750	1.7628	0.038969	KIF9
All_epilepsy	ENSG00000116815	1	117057157	117113661	22	2	69755	1.7627	0.038975	CD58
All_epilepsy	ENSG00000105717	19	19672522	19729725	57	9	70145	1.7627	0.038975	PBX4
All_epilepsy	ENSG00000165521	14	89078775	89259096	266	20	69235	1.7625	0.038991	EML5
All_epilepsy	ENSG00000119669	14	77490888	77495034	3	1	70543	1.7619	0.039044	IRF2BPL
All_epilepsy	ENSG00000254122	5	140797427	140892546	195	25	68978	1.7615	0.039074	PCDHGB7
All_epilepsy	ENSG00000128040	4	57676026	57687908	18	3	69389	1.7615	0.039079	SPINK2
All_epilepsy	ENSG00000137055	9	26904081	26947461	107	12	68818	1.761	0.039122	PLAA
All_epilepsy	ENSG00000138821	4	103172198	103352415	353	33	70480	1.7606	0.03915	SLC39A8
All_epilepsy	ENSG00000039319	5	79703832	79775169	101	5	69096	1.7605	0.039158	ZFYVE16
All_epilepsy	ENSG00000184619	17	8271955	8280029	9	2	70329	1.76	0.039208	KRBA2
All_epilepsy	ENSG00000167671	19	4444996	4457819	22	3	69059	1.7592	0.039272	UBXN6
All_epilepsy	ENSG00000149547	11	125439112	125454575	29	5	68616	1.7591	0.039278	EI24
All_epilepsy	ENSG00000188822	1	24197016	24285549	50	1	68983	1.7591	0.039283	CNR2
All_epilepsy	ENSG00000087365	11	65818200	65836779	20	4	70397	1.759	0.039287	SF3B2
All_epilepsy	ENSG00000198670	6	160952515	161087407	161	13	69873	1.759	0.039289	LPA
All_epilepsy	ENSG00000175893	9	14611069	14693469	239	30	68935	1.7588	0.039309	ZDHHC21
All_epilepsy	ENSG00000117523	1	171454651	171562650	197	13	70909	1.758	0.039371	PRRC2C
All_epilepsy	ENSG00000161791	12	50031724	50101948	55	3	70057	1.7575	0.039413	FMNL3
All_epilepsy	ENSG00000197965	1	167690429	167761156	127	18	70175	1.7574	0.039424	MPZL1
All_epilepsy	ENSG00000141437	18	29339525	29340843	1	1	65892	1.7572	0.03944	SLC25A52
All_epilepsy	ENSG00000241973	22	21061979	21213705	306	13	70050	1.757	0.039456	PI4KA
All_epilepsy	ENSG00000130304	19	17579578	17616977	8	2	68094	1.7566	0.039491	SLC27A1
All_epilepsy	ENSG00000136267	7	14184674	15014402	1653	133	69482	1.756	0.039545	DGKB
All_epilepsy	ENSG00000108932	17	66263167	66287408	6	2	65180	1.7559	0.03955	SLC16A6
All_epilepsy	ENSG00000175416	5	175819456	175843570	10	3	67590	1.7554	0.039598	CLTB
All_epilepsy	ENSG00000135919	2	224839829	224904036	153	20	69380	1.7551	0.039618	SERPINE2
All_epilepsy	ENSG00000172878	2	172864490	172947158	120	15	68588	1.7546	0.039663	METAP1D
All_epilepsy	ENSG00000135899	2	231032009	231090444	168	15	70108	1.7545	0.039668	SP110
All_epilepsy	ENSG00000136110	13	53277399	53313947	63	6	67474	1.7535	0.039755	LECT1
All_epilepsy	ENSG00000116574	1	228870824	228882416	36	5	70839	1.7535	0.039758	RHOU
All_epilepsy	ENSG00000213593	11	57480072	57508445	26	4	69932	1.7532	0.039785	TMX2
All_epilepsy	ENSG00000146425	6	159057506	159065771	9	2	70240	1.7531	0.039795	DYNLT1
All_epilepsy	ENSG00000184857	16	8874241	8891505	72	10	69709	1.7522	0.039869	TMEM186
All_epilepsy	ENSG00000241962	2	99757948	99939204	325	25	69093	1.7521	0.039876	C2orf15
All_epilepsy	ENSG00000170759	10	32297938	32345359	76	9	69383	1.7518	0.039901	KIF5B
All_epilepsy	ENSG00000137185	6	28192664	28201260	21	5	69585	1.7517	0.039909	ZSCAN9
All_epilepsy	ENSG00000180304	15	64979772	64995480	17	4	66111	1.7516	0.039921	OAZ2
All_epilepsy	ENSG00000135148	12	112563305	112591407	23	5	63673	1.7512	0.03996	TRAFD1
All_epilepsy	ENSG00000134817	11	57001051	57004709	7	3	69850	1.7511	0.039966	APLNR
All_epilepsy	ENSG00000174807	11	66081958	66084515	2	1	70181	1.751	0.039974	CD248
All_epilepsy	ENSG00000181555	3	47057919	47205457	124	8	69493	1.7507	0.04	SETD2
All_epilepsy	ENSG00000253846	5	140792743	140892546	198	25	69004	1.75	0.040056	PCDHGA10
All_epilepsy	ENSG00000178381	7	1191707	1200395	36	8	67274	1.7495	0.040106	ZFAND2A
All_epilepsy	ENSG00000183908	11	56949221	56959191	23	6	69793	1.7492	0.040126	LRRC55
All_epilepsy	ENSG00000166311	11	6411655	6416228	2	1	67927	1.749	0.040148	SMPD1
All_epilepsy	ENSG00000163513	3	30647994	30735634	170	23	69588	1.7486	0.040177	TGFBR2
All_epilepsy	ENSG00000198795	18	22641890	22932154	385	57	69034	1.748	0.040233	ZNF521
All_epilepsy	ENSG00000146670	11	64833772	64851636	24	6	69867	1.7474	0.04028	CDCA5
All_epilepsy	ENSG00000106089	7	73113536	73134002	1	1	68402	1.7465	0.04036	STX1A
All_epilepsy	ENSG00000166484	17	19281034	19286857	1	1	68465	1.7465	0.04036	MAPK7
All_epilepsy	ENSG00000070413	22	19023795	19109967	245	11	70936	1.7458	0.040421	DGCR2
All_epilepsy	ENSG00000162923	1	224572845	224624735	46	3	69696	1.7454	0.040456	WDR26
All_epilepsy	ENSG00000213512	1	89597434	89641723	53	5	68375	1.7452	0.040477	GBP7
All_epilepsy	ENSG00000124279	5	7859272	7869150	18	4	69015	1.745	0.04049	FASTKD3
All_epilepsy	ENSG00000162144	11	61116217	61129771	1	1	67262	1.7448	0.04051	CYB561A3
All_epilepsy	ENSG00000173141	13	21750784	21753223	3	2	68857	1.7444	0.040541	MRP63
All_epilepsy	ENSG00000081913	18	60382672	60647666	302	24	68222	1.7443	0.040555	PHLPP1
All_epilepsy	ENSG00000136169	13	50018429	50069138	114	12	69988	1.7442	0.040564	SETDB2
All_epilepsy	ENSG00000163815	3	45043040	45077563	79	8	70000	1.744	0.040582	CLEC3B
All_epilepsy	ENSG00000099800	19	2425622	2427892	3	1	69855	1.7432	0.040653	TIMM13
All_epilepsy	ENSG00000170236	15	50792759	50838905	123	13	69828	1.7416	0.040793	USP50
All_epilepsy	ENSG00000165819	14	21966277	21979517	28	6	70584	1.7413	0.040812	METTL3
All_epilepsy	ENSG00000137574	8	56685701	56738007	110	8	69772	1.7411	0.040835	TGS1
All_epilepsy	ENSG00000253305	5	140787770	140892546	205	26	69006	1.741	0.040845	PCDHGB6
All_epilepsy	ENSG00000182747	6	137243402	137246777	2	1	66789	1.7402	0.040909	SLC35D3
All_epilepsy	ENSG00000170608	19	46367247	46377055	12	4	70158	1.74	0.040929	FOXA3
All_epilepsy	ENSG00000214708	17	30468245	30470154	2	1	71328	1.7396	0.040963	AC090616.2
All_epilepsy	ENSG00000172717	14	67656110	67695267	93	10	67388	1.7389	0.041029	FAM71D
All_epilepsy	ENSG00000111725	12	120105558	120119435	15	2	68448	1.7383	0.041078	PRKAB1
All_epilepsy	ENSG00000108604	17	61909444	61920425	13	2	71171	1.7374	0.041158	SMARCD2
All_epilepsy	ENSG00000145817	5	143537723	143550278	30	5	70258	1.7362	0.041263	YIPF5
All_epilepsy	ENSG00000104738	8	48872745	48890720	4	1	69870	1.7356	0.041319	MCM4
All_epilepsy	ENSG00000168143	6	54711569	54806820	274	26	69456	1.7349	0.041377	FAM83B
All_epilepsy	ENSG00000130643	10	135138927	135150475	12	3	68532	1.7346	0.041404	CALY
All_epilepsy	ENSG00000183117	8	2792875	4852494	9715	548	68039	1.7345	0.041418	CSMD1
All_epilepsy	ENSG00000100151	22	38452318	38471708	29	7	68597	1.734	0.041458	PICK1
All_epilepsy	ENSG00000185149	4	156129781	156138230	9	3	68084	1.7332	0.041531	NPY2R
All_epilepsy	ENSG00000186417	15	51633826	51700210	208	23	69443	1.7325	0.041591	GLDN
All_epilepsy	ENSG00000141977	19	16272179	16284336	25	2	68900	1.7323	0.041608	CIB3
All_epilepsy	ENSG00000115875	2	38970741	38978636	4	1	70286	1.7323	0.041614	SRSF7
All_epilepsy	ENSG00000149534	11	59855734	59863444	17	3	68859	1.7321	0.041629	MS4A2
All_epilepsy	ENSG00000035403	10	75757872	75879918	91	10	70536	1.7308	0.041745	VCL
All_epilepsy	ENSG00000082212	18	48405419	48474691	72	6	70515	1.7306	0.041761	ME2
All_epilepsy	ENSG00000151023	10	25270908	25305089	18	3	70076	1.7306	0.041762	ENKUR
All_epilepsy	ENSG00000213578	15	75118888	75124141	6	2	68801	1.7293	0.041878	CPLX3
All_epilepsy	ENSG00000112782	6	45868045	46048132	386	49	69659	1.7292	0.041886	CLIC5
All_epilepsy	ENSG00000163064	2	119599747	119605254	3	2	68105	1.7287	0.041933	EN1
All_epilepsy	ENSG00000198728	10	103867317	103880210	12	4	66270	1.7283	0.041969	LDB1
All_epilepsy	ENSG00000162390	1	55007930	55104865	166	28	67975	1.7279	0.041999	ACOT11
All_epilepsy	ENSG00000197927	2	132479948	132524973	11	1	70203	1.7279	0.041999	C2orf27A
All_epilepsy	ENSG00000007392	16	238968	279462	51	9	68254	1.7275	0.042041	LUC7L
All_epilepsy	ENSG00000135723	16	67263290	67281561	14	3	67204	1.7266	0.042118	FHOD1
All_epilepsy	ENSG00000133193	17	71203492	71232892	83	5	70266	1.7257	0.042203	FAM104A
All_epilepsy	ENSG00000196110	19	9404951	9420514	21	4	70699	1.7256	0.042214	ZNF699
All_epilepsy	ENSG00000162676	1	92940319	92952433	14	2	70931	1.7252	0.042248	GFI1
All_epilepsy	ENSG00000084073	1	40723779	40759856	27	6	70501	1.7249	0.042272	ZMPSTE24
All_epilepsy	ENSG00000165417	14	81641796	81687721	66	10	69588	1.7246	0.042301	GTF2A1
All_epilepsy	ENSG00000092054	14	23881947	23904927	41	6	69076	1.7231	0.042433	MYH7
All_epilepsy	ENSG00000137802	15	42066632	42120053	64	9	69995	1.7229	0.042451	MAPKBP1
All_epilepsy	ENSG00000171848	2	10262455	10271545	7	1	69945	1.7225	0.042486	RRM2
All_epilepsy	ENSG00000173660	1	46769303	46782448	14	4	68171	1.7224	0.042494	UQCRH
All_epilepsy	ENSG00000114503	3	196662273	196669468	19	4	70265	1.7219	0.04254	NCBP2
All_epilepsy	ENSG00000155506	5	154092462	154197167	119	16	69171	1.7216	0.042575	LARP1
All_epilepsy	ENSG00000176383	12	122688090	122693499	4	2	68227	1.7211	0.042621	B3GNT4
All_epilepsy	ENSG00000124120	20	43104526	43123244	14	2	68183	1.7205	0.042667	TTPAL
All_epilepsy	ENSG00000178928	19	48304500	48322308	10	1	68096	1.7201	0.042711	TPRX1
All_epilepsy	ENSG00000081026	1	113933371	114228545	390	24	70423	1.7185	0.04285	MAGI3
All_epilepsy	ENSG00000141279	17	45600308	45700642	79	8	69080	1.7184	0.042862	NPEPPS
All_epilepsy	ENSG00000151789	3	21459915	22414812	2737	241	69644	1.7169	0.043002	ZNF385D
All_epilepsy	ENSG00000152223	18	43427574	43547240	188	14	70825	1.7166	0.043025	EPG5
All_epilepsy	ENSG00000121895	4	38968365	39034542	77	10	69048	1.7164	0.043042	TMEM156
All_epilepsy	ENSG00000175467	11	65729160	65747299	37	7	69085	1.7152	0.043157	SART1
All_epilepsy	ENSG00000049245	1	7831329	7841492	20	6	69310	1.7147	0.043201	VAMP3
All_epilepsy	ENSG00000186832	17	39766030	39772151	3	1	69561	1.7143	0.043238	KRT16
All_epilepsy	ENSG00000107018	9	5334969	5339873	10	2	69866	1.713	0.04336	RLN1
All_epilepsy	ENSG00000218819	2	21346789	21366144	15	4	70722	1.7125	0.043398	TDRD15
All_epilepsy	ENSG00000119121	9	77337411	77503010	176	25	69612	1.7124	0.043414	TRPM6
All_epilepsy	ENSG00000259207	17	45331212	45421658	245	28	69629	1.7118	0.043464	ITGB3
All_epilepsy	ENSG00000259753	17	45331263	45421658	245	28	69629	1.7118	0.043464	ITGB3
All_epilepsy	ENSG00000205084	16	75572015	75590184	45	5	70210	1.7117	0.043478	TMEM231
All_epilepsy	ENSG00000140280	15	52015208	52043782	64	8	70099	1.7112	0.043525	LYSMD2
All_epilepsy	ENSG00000153208	2	112656056	112787138	341	17	69866	1.7111	0.043531	MERTK
All_epilepsy	ENSG00000165879	10	99079022	99081672	2	1	67810	1.7108	0.043559	FRAT1
All_epilepsy	ENSG00000083807	19	58990879	59023780	40	5	69697	1.7108	0.04356	SLC27A5
All_epilepsy	ENSG00000141101	16	69775770	69788843	19	5	70250	1.7108	0.043561	NOB1
All_epilepsy	ENSG00000158485	1	158297741	158301321	6	2	68637	1.7104	0.0436	CD1B
All_epilepsy	ENSG00000108465	17	46045176	46059140	36	6	68549	1.7102	0.043611	CDK5RAP3
All_epilepsy	ENSG00000120805	12	101786898	101801598	15	4	69999	1.7095	0.04368	ARL1
All_epilepsy	ENSG00000255552	6	31679548	31681842	2	1	67891	1.7095	0.043682	LY6G6E
All_epilepsy	ENSG00000198825	10	121485609	121588652	154	10	68925	1.7087	0.043755	INPP5F
All_epilepsy	ENSG00000186827	1	1146706	1149518	1	1	68180	1.7086	0.04376	TNFRSF4
All_epilepsy	ENSG00000184698	11	5410607	5411664	7	1	71308	1.7083	0.043795	OR51M1
All_epilepsy	ENSG00000100519	14	53173890	53195305	18	3	69278	1.7076	0.043856	PSMC6
All_epilepsy	ENSG00000113100	5	26880709	27121257	385	30	70123	1.7075	0.043861	CDH9
All_epilepsy	ENSG00000119574	19	59024897	59050278	9	3	68621	1.7073	0.043879	ZBTB45
All_epilepsy	ENSG00000121068	17	59477257	59486827	12	2	67405	1.7072	0.043896	TBX2
All_epilepsy	ENSG00000140941	16	87417601	87438385	38	10	65940	1.7069	0.04392	MAP1LC3B
All_epilepsy	ENSG00000140506	15	75105057	75118099	24	5	68893	1.7068	0.043927	LMAN1L
All_epilepsy	ENSG00000120051	10	106113522	106214848	54	9	69563	1.7066	0.043945	CCDC147
All_epilepsy	ENSG00000234965	22	42307297	42310570	10	3	69355	1.7064	0.04397	SHISA8
All_epilepsy	ENSG00000197863	19	37308330	37341689	30	6	69949	1.7063	0.043979	ZNF790
All_epilepsy	ENSG00000061492	5	137419581	137428054	10	3	70521	1.7062	0.043985	WNT8A
All_epilepsy	ENSG00000165995	10	18429606	18830798	1101	127	69096	1.7062	0.043988	CACNB2
All_epilepsy	ENSG00000114127	3	142025449	142166904	111	9	70884	1.7057	0.044031	XRN1
All_epilepsy	ENSG00000167371	16	29823177	29827201	2	1	70536	1.7057	0.044035	PRRT2
All_epilepsy	ENSG00000186973	1	43610824	43622067	35	6	68807	1.7055	0.044052	FAM183A
All_epilepsy	ENSG00000100726	16	1543345	1560458	14	3	68611	1.7054	0.044056	TELO2
All_epilepsy	ENSG00000171812	1	36560837	36590821	36	6	69022	1.7053	0.04407	COL8A2
All_epilepsy	ENSG00000138600	15	50999506	51058005	164	13	69432	1.705	0.0441	SPPL2A
All_epilepsy	ENSG00000153214	2	112812800	112876895	119	19	67381	1.7036	0.044228	TMEM87B
All_epilepsy	ENSG00000160584	11	116714118	116969153	761	42	69960	1.7032	0.044269	SIK3
All_epilepsy	ENSG00000167281	17	77085427	77613550	265	53	69411	1.7027	0.044316	RBFOX3
All_epilepsy	ENSG00000103196	16	84853590	84954374	228	30	68543	1.7025	0.044328	CRISPLD2
All_epilepsy	ENSG00000140750	16	24930706	25026987	118	10	69855	1.7024	0.044338	ARHGAP17
All_epilepsy	ENSG00000165757	10	30301729	30404423	119	22	69498	1.7016	0.044415	KIAA1462
All_epilepsy	ENSG00000213619	11	47586888	47606114	11	4	69697	1.7016	0.044419	NDUFS3
All_epilepsy	ENSG00000120437	6	160181360	160200144	58	8	69377	1.6991	0.044649	ACAT2
All_epilepsy	ENSG00000132170	3	12328867	12475855	248	21	69749	1.6989	0.044668	PPARG
All_epilepsy	ENSG00000214113	6	5102827	5261172	442	42	68850	1.6987	0.044683	LYRM4
All_epilepsy	ENSG00000170950	6	49753366	49755053	1	1	71312	1.6983	0.04473	PGK2
All_epilepsy	ENSG00000094755	5	170190354	170241051	91	13	70334	1.698	0.044751	GABRP
All_epilepsy	ENSG00000101638	18	44259081	44339220	172	35	69068	1.6979	0.044759	ST8SIA5
All_epilepsy	ENSG00000178741	15	75212132	75230509	25	4	70463	1.6975	0.044799	COX5A
All_epilepsy	ENSG00000188124	11	6789218	6790286	4	2	71209	1.6972	0.044826	OR2AG2
All_epilepsy	ENSG00000146350	6	121400640	121655891	876	42	68678	1.6971	0.044842	TBC1D32
All_epilepsy	ENSG00000170037	17	7835419	7853236	28	1	70058	1.697	0.044847	CNTROB
All_epilepsy	ENSG00000183114	1	20878932	20881512	3	1	71325	1.697	0.044852	FAM43B
All_epilepsy	ENSG00000172426	6	43612783	43640336	55	6	66881	1.6961	0.044929	RSPH9
All_epilepsy	ENSG00000139620	12	49047184	49076021	49	7	68272	1.694	0.04513	KANSL2
All_epilepsy	ENSG00000111785	12	107168373	107283090	137	19	67818	1.6935	0.045184	RIC8B
All_epilepsy	ENSG00000117472	1	46640745	46651630	6	2	68925	1.6931	0.045219	TSPAN1
All_epilepsy	ENSG00000171055	2	36778570	36873230	166	18	68744	1.6929	0.045234	FEZ2
All_epilepsy	ENSG00000152086	2	130949318	130956034	4	1	69848	1.6928	0.04525	TUBA3E
All_epilepsy	ENSG00000143771	1	224544552	224567161	25	3	69398	1.6927	0.045257	CNIH4
All_epilepsy	ENSG00000143742	1	225965531	225978168	17	5	69048	1.6925	0.045271	SRP9
All_epilepsy	ENSG00000074706	6	154475631	154677926	411	56	69454	1.6921	0.045314	IPCEF1
[truncated: 14,366 more rows]

## Sheet: GGE
Supplementary Data 3. Genome-wide gene based association study (GWGAS) results. Analysis of gene-based association score based on the aggregate of all SNPs inside each gene using MAGMA.
Column Description 1. EpiType: The epilepsy type in which the association is studied. 2. GENE: the gene ID as specified in the annotation file 3. CHR: the chromosome the gene is on 4. START: the annotation start of the gene on that chromosome (the boundary includes any window around the gene applied during annotation) 5. STOP: the annotation end of the gene 6. NSNPS: the number of SNPs annotated …
EpiType	GENE	CHR	START	STOP	NSNPS	NPARAM	N	ZSTAT	P	SYMBOL
GGE	ENSG00000065000	19	2100988	2164464	85	7	24533	7.3357	1.1025e-13	AP3D1
GGE	ENSG00000114395	3	50388126	50395891	3	2	24390	6.7262	8.7088e-12	CYB561D2
GGE	ENSG00000152377	5	136310987	136934068	1225	101	24726	6.6241	1.7465e-11	SPOCK1
GGE	ENSG00000165118	9	86553226	86571901	20	4	24833	6.5959	2.1129e-11	C9orf64
GGE	ENSG00000120049	10	103585731	103603677	19	5	24842	6.555	2.7818e-11	KCNIP2
GGE	ENSG00000115392	2	58386378	58468507	137	20	24883	6.1938	2.9369e-10	FANCL
GGE	ENSG00000165119	9	86582998	86595569	13	4	24875	6.1211	4.6474e-10	HNRNPK
GGE	ENSG00000028116	2	58134786	58387055	386	35	24826	6.1094	5e-10	VRK2
GGE	ENSG00000005243	17	46103533	46115392	20	8	24533	5.9043	1.7704e-09	COPZ2
GGE	ENSG00000120029	10	103605356	103815950	187	19	24747	5.8631	2.2711e-09	C10orf76
GGE	ENSG00000178966	9	86595626	86618985	23	3	24900	5.7155	5.4691e-09	RMI1
GGE	ENSG00000179094	17	8043790	8059824	10	3	24565	5.7075	5.7336e-09	PER1
GGE	ENSG00000068028	3	50367219	50378411	10	4	24432	5.7054	5.8047e-09	RASSF1
GGE	ENSG00000171735	1	6845384	7829766	1506	184	24680	5.6346	8.7736e-09	CAMTA1
GGE	ENSG00000165115	9	86451613	86536342	109	8	24889	5.6305	8.9822e-09	KIF27
GGE	ENSG00000241360	22	38054734	38062941	13	2	24757	5.1469	1.3243e-07	PDXP
GGE	ENSG00000179564	3	50316458	50325545	3	1	24920	5.1466	1.3266e-07	LSMEM2
GGE	ENSG00000196296	16	28889726	28915830	4	1	24426	5.081	1.877e-07	ATP2A1
GGE	ENSG00000179029	17	8076555	8079717	8	3	24223	5.0586	2.1115e-07	TMEM107
GGE	ENSG00000144285	2	166845670	166984523	326	28	24882	5.0414	2.3107e-07	SCN1A
GGE	ENSG00000198408	10	103544200	103578696	34	7	24789	4.9463	3.7813e-07	MGEA5
GGE	ENSG00000177455	16	28943260	28950667	2	1	24211	4.9335	4.039e-07	CD19
GGE	ENSG00000176953	16	28962128	28978418	2	1	24225	4.9217	4.2888e-07	NFATC2IP
GGE	ENSG00000263620	17	8054134	8066293	18	4	24663	4.9174	4.3856e-07	RP11-599B13.6
GGE	ENSG00000141293	17	46210802	46507637	579	39	24812	4.8636	5.7631e-07	SKAP1
GGE	ENSG00000169851	4	30722037	31148422	824	70	24791	4.839	6.5258e-07	PCDH7
GGE	ENSG00000114353	3	50263724	50296787	1	1	25003	4.8104	7.532e-07	GNAI2
GGE	ENSG00000104885	19	2164148	2232577	51	5	23984	4.7479	1.0278e-06	DOT1L
GGE	ENSG00000220205	17	8062467	8066864	5	1	24699	4.7423	1.0567e-06	VAMP2
GGE	ENSG00000176046	16	28548606	28550495	2	1	24637	4.7109	1.2331e-06	NUPR1
GGE	ENSG00000198648	2	168810530	169104651	678	56	24851	4.6782	1.4467e-06	STK39
GGE	ENSG00000108465	17	46045176	46059140	35	6	24578	4.6149	1.9665e-06	CDK5RAP3
GGE	ENSG00000122515	7	44788180	44809477	19	3	24723	4.5952	2.1619e-06	ZMIZ2
GGE	ENSG00000230873	6	17102489	17131603	48	3	24727	4.5937	2.1776e-06	STMND1
GGE	ENSG00000105866	7	21467652	21554440	153	18	24655	4.5653	2.4937e-06	SP4
GGE	ENSG00000214706	3	50325163	50330349	2	1	24787	4.5638	2.5113e-06	IFRD2
GGE	ENSG00000100097	22	38071615	38075813	5	2	24476	4.5408	2.8022e-06	LGALS1
GGE	ENSG00000126062	3	50392180	50397041	1	1	24957	4.5221	3.062e-06	TMEM115
GGE	ENSG00000100092	22	38030661	38062939	48	6	24690	4.5132	3.193e-06	SH3BP1
GGE	ENSG00000132970	13	27131840	27263085	320	28	24566	4.5029	3.3523e-06	WASF3
GGE	ENSG00000177548	16	28915742	28947847	7	2	24280	4.4969	3.4476e-06	RABEP2
GGE	ENSG00000171928	17	18684308	18710027	27	6	24524	4.4924	3.5213e-06	TVP23B
GGE	ENSG00000101057	20	42295754	42345136	89	9	24607	4.4909	3.5465e-06	MYBL2
GGE	ENSG00000134824	11	61560452	61634826	104	13	24477	4.472	3.8741e-06	FADS2
GGE	ENSG00000156475	5	145967936	146464347	774	70	24748	4.4552	4.1914e-06	PPP2R2B
GGE	ENSG00000197386	4	3076408	3245676	268	21	24521	4.4504	4.2864e-06	HTT
GGE	ENSG00000196366	9	139377947	139380518	1	1	24803	4.4485	4.323e-06	C9orf163
GGE	ENSG00000178999	17	8108056	8113918	10	4	24462	4.4485	4.3243e-06	AURKB
GGE	ENSG00000181418	12	49388932	49393092	2	1	24611	4.4475	4.3447e-06	DDN
GGE	ENSG00000152409	5	78532012	78623038	130	10	24915	4.4444	4.4075e-06	JMY
GGE	ENSG00000108312	17	42282401	42298994	11	2	24756	4.4332	4.643e-06	UBTF
GGE	ENSG00000178971	17	8130191	8151362	36	7	24428	4.3992	5.433e-06	CTC1
GGE	ENSG00000114646	3	47603729	47622282	13	2	24705	4.393	5.5904e-06	CSPG5
GGE	ENSG00000183527	21	40546695	40555777	34	5	24909	4.3821	5.8766e-06	PSMG1
GGE	ENSG00000183640	21	32185016	32185570	1	1	24684	4.3686	6.251e-06	KRTAP8-1
GGE	ENSG00000185658	21	40556102	40693485	285	16	24923	4.361	6.4742e-06	BRWD1
GGE	ENSG00000171931	17	18647326	18682662	32	6	24337	4.3491	6.8354e-06	FBXW10
GGE	ENSG00000166913	20	43514317	43537173	23	3	24928	4.3483	6.8594e-06	YWHAB
GGE	ENSG00000107833	10	103541082	103543170	3	1	24643	4.326	7.5937e-06	NPM3
GGE	ENSG00000163939	3	52579368	52719933	229	10	24596	4.323	7.6961e-06	PBRM1
GGE	ENSG00000003056	12	9092959	9102551	16	4	24761	4.3178	7.8808e-06	M6PR
GGE	ENSG00000007402	3	50400233	50541675	198	14	24621	4.3125	8.0716e-06	CACNA2D2
GGE	ENSG00000037637	1	16573334	16678949	168	9	24916	4.309	8.2003e-06	FBXO42
GGE	ENSG00000004838	3	50378541	50384283	2	1	24840	4.3028	8.4317e-06	ZMYND10
GGE	ENSG00000130950	9	97077605	97090926	8	3	24749	4.2896	8.9503e-06	NUTM2F
GGE	ENSG00000168135	22	38822332	38851205	40	8	24664	4.276	9.5154e-06	KCNJ4
GGE	ENSG00000176148	11	33060963	33127489	193	10	24895	4.2711	9.7246e-06	TCP11L1
GGE	ENSG00000151834	4	46250444	46477247	309	19	24748	4.2707	9.7419e-06	GABRA2
GGE	ENSG00000114904	3	52744800	52804965	93	8	24573	4.2508	1.0652e-05	NEK4
GGE	ENSG00000181929	12	49396057	49412980	8	1	24813	4.2448	1.094e-05	PRKAG1
GGE	ENSG00000001617	3	50192478	50226508	45	8	24671	4.2302	1.1675e-05	SEMA3F
GGE	ENSG00000016864	3	52728505	52740048	10	2	24739	4.2274	1.182e-05	GLT8D1
GGE	ENSG00000102531	13	49550048	49783915	147	7	24664	4.2164	1.2413e-05	FNDC3A
GGE	ENSG00000047849	3	47892182	48130769	142	7	24717	4.1854	1.4233e-05	MAP4
GGE	ENSG00000151006	16	31094746	31100949	8	1	24698	4.1784	1.4681e-05	PRSS53
GGE	ENSG00000151690	2	191273081	191373931	193	18	24863	4.1741	1.4959e-05	MFSD6
GGE	ENSG00000168273	3	52568029	52613253	70	7	24384	4.1681	1.5359e-05	SMIM4
GGE	ENSG00000114902	3	52738971	52742182	3	1	25009	4.1609	1.5853e-05	SPCS1
GGE	ENSG00000128915	15	60711808	60771359	37	6	24801	4.1603	1.5893e-05	NARG2
GGE	ENSG00000136449	17	48585745	48608862	51	7	24764	4.1445	1.7026e-05	MYCBPAP
GGE	ENSG00000167548	12	49412758	49453557	12	2	24820	4.1413	1.7267e-05	KMT2D
GGE	ENSG00000080709	5	113696642	113832337	227	31	24671	4.1397	1.739e-05	KCNN2
GGE	ENSG00000218357	22	47857048	47882860	39	3	24681	4.1338	1.7837e-05	LL22NC03-75H12.2
GGE	ENSG00000049246	1	7844380	7905237	164	19	24794	4.1303	1.8116e-05	PER3
GGE	ENSG00000162267	3	52828784	52843025	13	4	24593	4.1281	1.8286e-05	ITIH3
GGE	ENSG00000198844	17	8213559	8225829	17	5	24591	4.1247	1.856e-05	ARHGEF15
GGE	ENSG00000099377	16	30996519	31000473	6	2	24789	4.1176	1.9145e-05	HSD3B7
GGE	ENSG00000141127	17	18743398	18834581	221	13	24769	4.1149	1.937e-05	PRPSAP2
GGE	ENSG00000109475	4	109541722	109551568	14	3	24320	4.1002	2.0639e-05	RPL34
GGE	ENSG00000165995	10	18429606	18830798	1126	134	24688	4.0949	2.1118e-05	CACNB2
GGE	ENSG00000140474	15	75128457	75135687	12	2	24927	4.0709	2.3418e-05	ULK3
GGE	ENSG00000167395	16	31085743	31095517	11	2	24760	4.0658	2.3931e-05	ZNF646
GGE	ENSG00000132881	1	16558195	16563657	8	3	24795	4.0595	2.4593e-05	RSG1
GGE	ENSG00000149294	11	112831997	113149158	50	7	24842	4.0589	2.4647e-05	NCAM1
GGE	ENSG00000184990	14	105219437	105234831	5	1	24305	4.0485	2.5769e-05	SIVA1
GGE	ENSG00000145920	5	175223313	175311023	149	27	24646	4.0386	2.6886e-05	CPLX2
GGE	ENSG00000188107	6	64429876	66417118	4301	166	24781	4.0282	2.8102e-05	EYS
GGE	ENSG00000177191	19	41931264	41934635	4	1	24461	4.0228	2.8755e-05	B3GNT8
GGE	ENSG00000121690	11	33037410	33055128	48	3	24725	4.0204	2.9053e-05	DEPDC7
GGE	ENSG00000248098	19	41884215	41930910	77	2	24613	4.0099	3.0368e-05	BCKDHA
GGE	ENSG00000077348	19	41892279	41903384	13	1	24467	4.0092	3.0466e-05	EXOSC5
GGE	ENSG00000124019	2	225243415	225266802	45	8	24877	4.0061	3.0864e-05	FAM124B
GGE	ENSG00000167394	16	31072164	31085641	15	3	24769	4.001	3.1536e-05	ZNF668
GGE	ENSG00000263002	19	44645710	44663156	18	4	24553	3.985	3.3737e-05	ZNF234
GGE	ENSG00000185100	14	105190523	105213662	9	1	24458	3.9841	3.3872e-05	ADSSL1
GGE	ENSG00000055957	3	52811603	52826078	23	3	24804	3.9776	3.4813e-05	ITIH1
GGE	ENSG00000136908	9	130697378	130700763	5	1	24696	3.9708	3.5822e-05	DPM2
GGE	ENSG00000118985	5	95220802	95297775	134	7	24922	3.961	3.7324e-05	ELL2
GGE	ENSG00000110917	12	121124672	121139667	32	8	24585	3.954	3.8423e-05	MLEC
GGE	ENSG00000152503	5	114460459	114516243	66	8	24678	3.9537	3.8474e-05	TRIM36
GGE	ENSG00000142623	1	17531621	17572500	42	7	24717	3.95	3.9077e-05	PADI1
GGE	ENSG00000173473	3	47626762	47823596	134	5	24749	3.9473	3.9516e-05	SMARCC1
GGE	ENSG00000148396	9	139334549	139372141	38	4	24879	3.9355	4.151e-05	SEC16A
GGE	ENSG00000138386	2	191511472	191557492	68	9	24788	3.9272	4.2975e-05	NAB1
GGE	ENSG00000161664	17	42247815	42256451	12	2	24644	3.9261	4.3167e-05	ASB16
GGE	ENSG00000131374	3	17198654	18486309	1899	73	24733	3.9205	4.4188e-05	TBC1D5
GGE	ENSG00000169018	15	68570141	68588203	13	2	24287	3.9114	4.589e-05	FEM1B
GGE	ENSG00000163938	3	52715172	52728508	17	3	24866	3.9087	4.6398e-05	GNL3
GGE	ENSG00000006025	17	45884738	45899200	42	7	24753	3.908	4.653e-05	OSBPL7
GGE	ENSG00000148384	9	139323071	139334274	26	5	24505	3.9077	4.6585e-05	INPP5E
GGE	ENSG00000083720	5	41730167	41870621	111	7	24673	3.9056	4.6988e-05	OXCT1
GGE	ENSG00000167595	19	36249044	36261930	19	6	24521	3.8987	4.8352e-05	C19orf55
GGE	ENSG00000101746	18	31431064	31804916	502	53	24576	3.891	4.9918e-05	NOL4
GGE	ENSG00000004939	17	42325753	42345509	5	1	24585	3.8678	5.4919e-05	SLC4A1
GGE	ENSG00000167106	9	130702858	130742792	27	2	24777	3.8537	5.8164e-05	FAM102A
GGE	ENSG00000178802	15	75182346	75191798	8	3	24778	3.8431	6.0753e-05	MPI
GGE	ENSG00000153827	2	230628554	230787955	108	11	24825	3.8416	6.1126e-05	TRIP12
GGE	ENSG00000101052	20	42219571	42275936	78	4	24659	3.8396	6.1627e-05	IFT52
GGE	ENSG00000099364	16	30934376	30960104	23	3	24663	3.8279	6.4623e-05	FBXL19
GGE	ENSG00000004776	19	36245469	36248980	2	1	24616	3.8269	6.4879e-05	HSPB6
GGE	ENSG00000099365	16	31000577	31021949	19	4	24645	3.8269	6.4884e-05	STX1B
GGE	ENSG00000126246	19	36230058	36233354	2	1	24442	3.8263	6.5043e-05	IGFLR1
GGE	ENSG00000153310	8	130851839	131029375	233	31	24578	3.8082	6.9997e-05	FAM49B
GGE	ENSG00000204463	6	31606805	31620482	29	9	24553	3.8077	7.013e-05	BAG6
GGE	ENSG00000140497	15	75136071	75165706	22	6	24611	3.8047	7.0998e-05	SCAMP2
GGE	ENSG00000168591	17	42264338	42269099	8	3	24870	3.8036	7.1318e-05	TMUB2
GGE	ENSG00000133454	22	26138111	26427007	697	91	24692	3.7994	7.253e-05	MYO18B
GGE	ENSG00000099381	16	30968615	30996437	18	4	24841	3.7991	7.2623e-05	SETD1A
GGE	ENSG00000189120	17	45922279	45933240	25	6	24754	3.7989	7.2659e-05	SP6
GGE	ENSG00000125319	17	42219274	42239844	20	3	24719	3.7906	7.5127e-05	C17orf53
GGE	ENSG00000099308	19	18208603	18262502	91	8	24424	3.7898	7.5371e-05	MAST3
GGE	ENSG00000198646	20	33284722	33413452	141	10	24896	3.7751	7.9974e-05	NCOA6
GGE	ENSG00000111058	12	81331594	81650533	807	60	24823	3.7651	8.3236e-05	ACSS3
GGE	ENSG00000172680	8	57025501	57026541	2	1	24477	3.7651	8.3252e-05	MOS
GGE	ENSG00000100842	14	23825611	23834961	13	2	24431	3.7569	8.6015e-05	EFS
GGE	ENSG00000114455	3	108015376	108097132	237	19	24741	3.7568	8.6065e-05	HHLA2
GGE	ENSG00000103496	16	31044210	31054296	14	3	24765	3.7557	8.6429e-05	STX4
GGE	ENSG00000049283	17	48609904	48621111	15	5	24587	3.7442	9.0483e-05	EPN3
GGE	ENSG00000196862	2	108443388	108507297	3	1	24659	3.7439	9.0604e-05	RGPD4
GGE	ENSG00000272333	19	36208921	36229779	26	7	24680	3.7404	9.1879e-05	KMT2B
GGE	ENSG00000120820	12	104382762	104457961	175	29	24744	3.7378	9.2823e-05	GLT8D2
GGE	ENSG00000131067	20	33432523	33460663	31	5	24914	3.733	9.4595e-05	GGT7
GGE	ENSG00000133794	11	13298199	13408813	148	22	24710	3.7291	9.6066e-05	ARNTL
GGE	ENSG00000075945	1	169890467	170054349	394	14	24556	3.7259	9.7304e-05	KIFAP3
GGE	ENSG00000171634	17	65821640	65980494	136	5	24883	3.7203	9.9476e-05	BPTF
GGE	ENSG00000132837	5	78293438	78531861	477	39	24768	3.7186	0.00010017	DMGDH
GGE	ENSG00000108840	17	42154114	42201070	45	4	24702	3.6987	0.00010835	HDAC5
GGE	ENSG00000044115	5	137946656	138270723	71	10	24607	3.6957	0.00010965	CTNNA1
GGE	ENSG00000078804	20	33292094	33301243	6	2	24813	3.6954	0.00010977	TP53INP2
GGE	ENSG00000130762	1	3370990	3397677	53	8	24627	3.6902	0.00011203	ARHGEF16
GGE	ENSG00000132153	3	47844399	47891685	24	3	24671	3.6621	0.00012507	DHX30
GGE	ENSG00000188807	1	9648932	9674935	19	3	24645	3.6368	0.00013803	TMEM201
GGE	ENSG00000139372	12	104359582	104382652	82	14	24857	3.6188	0.00014801	TDG
GGE	ENSG00000139908	14	24674903	24677568	2	1	24881	3.6011	0.00015847	TSSK4
GGE	ENSG00000139910	14	26912299	27066960	164	8	24823	3.5986	0.00015997	NOVA1
GGE	ENSG00000240184	5	140855580	140892542	63	13	24742	3.5937	0.00016298	PCDHGC3
GGE	ENSG00000176473	14	100842755	100996640	104	12	24599	3.5931	0.00016338	WDR25
GGE	ENSG00000198700	1	201798269	201853422	68	11	24819	3.5922	0.00016396	IPO9
GGE	ENSG00000172775	16	57186378	57220028	36	7	24519	3.5866	0.00016753	FAM192A
GGE	ENSG00000170417	2	103353367	103460352	146	11	24873	3.5847	0.00016876	TMEM182
GGE	ENSG00000127616	19	11071598	11176071	178	21	24495	3.5837	0.00016938	SMARCA4
GGE	ENSG00000087152	17	42269173	42277481	2	1	24165	3.5798	0.0001719	ATXN7L3
GGE	ENSG00000204377	1	16555368	16556038	2	1	24884	3.5723	0.00017692	C1orf134
GGE	ENSG00000175548	12	38710380	38717784	16	3	24824	3.571	0.0001778	ALG10B
GGE	ENSG00000108828	17	41166622	41177140	7	2	24611	3.5701	0.00017842	VAT1
GGE	ENSG00000167103	9	130683158	130693076	2	1	24451	3.5643	0.00018239	PIP5KL1
GGE	ENSG00000159111	17	45900638	45908900	25	4	24848	3.5639	0.00018269	MRPL10
GGE	ENSG00000163285	4	46037786	46126098	212	13	24733	3.56	0.00018543	GABRG1
GGE	ENSG00000174576	11	66188475	66194178	3	1	24598	3.5452	0.00019613	NPAS4
GGE	ENSG00000181090	9	140513444	140764468	167	14	24680	3.5445	0.00019667	EHMT1
GGE	ENSG00000152894	6	128289924	128841870	501	49	24208	3.5434	0.00019747	PTPRK
GGE	ENSG00000111725	12	120105558	120119435	15	2	24665	3.5417	0.00019875	PRKAB1
GGE	ENSG00000198892	1	201857808	201861434	6	3	24681	3.5368	0.00020249	SHISA4
GGE	ENSG00000078328	16	6069095	7763340	5516	338	24660	3.5345	0.0002043	RBFOX1
GGE	ENSG00000171612	1	9599541	9645237	21	2	24688	3.5323	0.00020598	SLC25A33
GGE	ENSG00000187391	7	77646393	79082890	3541	294	24800	3.5313	0.00020679	MAGI2
GGE	ENSG00000136098	13	52706775	52733996	59	8	24474	3.5309	0.00020707	NEK3
GGE	ENSG00000267796	19	36239262	36245420	8	3	24611	3.5235	0.00021291	LIN37
GGE	ENSG00000184988	17	41363854	41372061	6	2	24809	3.5173	0.00021796	TMEM106A
GGE	ENSG00000108825	17	41102543	41132545	19	3	24679	3.513	0.00022153	PTGES3L-AARSD1
GGE	ENSG00000107960	10	105642300	105677963	78	8	24811	3.5118	0.00022255	OBFC1
GGE	ENSG00000144120	2	120436743	120444083	27	5	24279	3.5117	0.00022262	TMEM177
GGE	ENSG00000159708	16	67360701	67419106	79	9	24496	3.502	0.00023087	LRRC36
GGE	ENSG00000162415	1	45482071	45771881	384	23	24824	3.4823	0.0002486	ZSWIM5
GGE	ENSG00000010327	3	52529354	52558511	22	5	24386	3.4811	0.00024965	STAB1
GGE	ENSG00000171385	1	112313284	112531777	408	73	24738	3.4689	0.00026126	KCND3
GGE	ENSG00000204928	5	145239296	145252531	5	2	24363	3.4664	0.0002637	GRXCR2
GGE	ENSG00000122406	1	93297582	93307481	7	2	24821	3.4579	0.00027224	RPL5
GGE	ENSG00000132155	3	12625100	12705725	162	12	24852	3.4564	0.00027373	RAF1
GGE	ENSG00000266967	17	41102543	41116515	9	2	24670	3.4517	0.00027853	AARSD1
GGE	ENSG00000090905	16	24741016	24838953	108	11	24797	3.4472	0.00028317	TNRC6A
GGE	ENSG00000107862	10	104005289	104142656	152	17	24660	3.4456	0.00028486	GBF1
GGE	ENSG00000168268	3	52558386	52569070	20	4	24601	3.4447	0.00028589	NT5DC2
GGE	ENSG00000167107	17	48503519	48552206	82	9	24660	3.4368	0.00029428	ACSF2
GGE	ENSG00000153832	2	230787018	230877825	81	10	24748	3.4355	0.00029569	FBXO36
GGE	ENSG00000088179	2	120517207	120741394	264	13	24454	3.4336	0.00029785	PTPN4
GGE	ENSG00000101049	20	42187608	42216877	13	2	24558	3.4161	0.00031765	SGK2
GGE	ENSG00000232850	9	130890612	130891481	2	1	24639	3.4146	0.0003194	AL590708.2
GGE	ENSG00000178741	15	75212132	75230509	24	4	24849	3.406	0.00032956	COX5A
GGE	ENSG00000143367	1	151512781	151556059	69	12	24714	3.4023	0.00033411	TUFT1
GGE	ENSG00000138443	2	204192942	204312446	112	13	24741	3.4012	0.00033548	ABI2
GGE	ENSG00000055147	5	153369688	153418496	75	5	24914	3.3976	0.00033985	FAM114A2
GGE	ENSG00000165985	10	16555742	16564004	14	3	24490	3.3932	0.00034545	C1QL3
GGE	ENSG00000150281	16	30907928	30914881	5	2	24655	3.3907	0.00034854	CTF1
GGE	ENSG00000145526	5	19473060	20575982	1797	117	24783	3.3893	0.0003503	CDH18
GGE	ENSG00000198863	17	41132582	41145707	7	2	24880	3.3878	0.00035231	RUNDC1
GGE	ENSG00000111144	12	96394606	96437298	96	11	24906	3.3867	0.00035372	LTA4H
GGE	ENSG00000167566	12	50184929	50222533	70	9	24408	3.3834	0.00035796	NCKAP5L
GGE	ENSG00000113273	5	78073032	78281910	450	43	24757	3.3806	0.00036169	ARSB
GGE	ENSG00000196872	2	99410309	99552722	286	23	24640	3.3801	0.0003623	KIAA1211L
GGE	ENSG00000134825	11	61535973	61560274	13	2	24677	3.3756	0.00036831	TMEM258
GGE	ENSG00000197165	16	28603264	28608430	6	2	24724	3.3731	0.00037164	SULT1A2
GGE	ENSG00000095637	10	97071528	97321171	687	88	24576	3.371	0.00037452	SORBS1
GGE	ENSG00000184857	16	8874241	8891505	72	10	24736	3.3701	0.00037577	TMEM186
GGE	ENSG00000145692	5	78407602	78428108	40	8	24705	3.3665	0.00038066	BHMT
GGE	ENSG00000149485	11	61567099	61596790	28	3	24658	3.3661	0.00038126	FADS1
GGE	ENSG00000143595	1	154293566	154297801	9	3	24726	3.3653	0.00038237	AQP10
GGE	ENSG00000197273	1	42628362	42630389	2	1	24792	3.3649	0.00038283	GUCA2A
GGE	ENSG00000185055	7	105205567	105241322	54	11	24606	3.3566	0.00039449	EFCAB10
GGE	ENSG00000134531	12	13349650	13369708	29	7	24744	3.3551	0.00039671	EMP1
GGE	ENSG00000139117	12	39040624	39301232	565	42	24420	3.3545	0.0003975	CPNE8
GGE	ENSG00000128573	7	113726382	114333827	462	45	24632	3.3521	0.00040098	FOXP2
GGE	ENSG00000214941	17	15879874	15903031	38	3	24871	3.3518	0.00040149	ZSWIM7
GGE	ENSG00000188554	17	41322498	41363708	58	2	24867	3.3497	0.00040457	NBR1
GGE	ENSG00000101104	20	43538703	43587676	52	9	24784	3.3467	0.00040885	PABPC1L
GGE	ENSG00000101493	18	74069644	74207146	173	21	24182	3.3427	0.00041487	ZNF516
GGE	ENSG00000100938	14	24701628	24708448	4	2	24746	3.3385	0.0004211	GMPR2
GGE	ENSG00000141294	17	45908993	45915079	12	4	24869	3.3334	0.00042891	LRRC46
GGE	ENSG00000162591	1	3406484	3528059	22	4	24372	3.325	0.00044206	MEGF6
GGE	ENSG00000267060	17	41120105	41132545	8	2	24718	3.3197	0.00045059	PTGES3L
GGE	ENSG00000188277	15	41062159	41064643	2	1	23878	3.3192	0.00045132	C15orf62
GGE	ENSG00000163431	1	201865580	201915715	70	11	24794	3.3143	0.00045936	LMOD1
GGE	ENSG00000196141	2	201170604	201346986	303	39	24691	3.3135	0.00046063	SPATS2L
GGE	ENSG00000012048	17	41196312	41277500	108	3	24908	3.3116	0.00046385	BRCA1
GGE	ENSG00000129250	17	4901243	4931696	59	12	24750	3.311	0.00046477	KIF1C
GGE	ENSG00000117335	1	207925402	207968858	46	8	24622	3.3099	0.00046668	CD46
GGE	ENSG00000174547	11	66202546	66234209	19	4	24857	3.3025	0.00047914	MRPL11
GGE	ENSG00000204469	6	31588497	31605548	44	12	24431	3.302	0.00047996	PRRC2A
GGE	ENSG00000154646	21	19641433	19858197	329	47	24685	3.3014	0.00048109	TMPRSS15
GGE	ENSG00000138592	15	50716577	50793280	178	12	24747	3.2973	0.00048813	USP8
GGE	ENSG00000164323	4	186080819	186130658	97	5	24697	3.2965	0.00048943	KIAA1430
GGE	ENSG00000134569	11	46878419	46940193	59	8	24528	3.2962	0.00048995	LRP4
GGE	ENSG00000132383	17	1732996	1803376	128	11	24772	3.2923	0.0004968	RPA1
GGE	ENSG00000037749	5	153418466	153600038	396	32	24769	3.2908	0.00049946	MFAP3
GGE	ENSG00000108599	17	19807615	19881656	68	5	24962	3.29	0.00050101	AKAP10
GGE	ENSG00000178921	17	8150936	8173809	43	9	24391	3.2886	0.00050345	PFAS
GGE	ENSG00000096696	6	7541808	7586950	79	14	24677	3.2847	0.00051039	DSP
GGE	ENSG00000170236	15	50792759	50838905	123	13	24808	3.2819	0.00051555	USP50
GGE	ENSG00000108018	10	108333421	108924292	913	95	24778	3.2771	0.00052441	SORCS1
GGE	ENSG00000141027	17	15932471	16121499	223	11	24874	3.2762	0.00052604	NCOR1
GGE	ENSG00000102967	16	72042487	72058954	41	7	24823	3.2761	0.00052628	DHODH
GGE	ENSG00000148334	9	130882972	130890741	2	1	24674	3.2682	0.00054109	PTGES2
GGE	ENSG00000089280	16	31191431	31203127	2	1	24774	3.2682	0.0005411	FUS
GGE	ENSG00000124920	11	61520114	61555990	25	5	24679	3.2676	0.0005423	MYRF
GGE	ENSG00000025293	20	34359896	34538303	289	14	24806	3.266	0.0005454	PHF20
GGE	ENSG00000064547	19	19734477	19739739	4	2	24621	3.2654	0.00054664	LPAR2
GGE	ENSG00000163873	1	37261128	37499730	259	29	24586	3.2653	0.00054672	GRIK3
GGE	ENSG00000074935	6	112391980	112408732	15	2	24978	3.2645	0.00054838	TUBE1
GGE	ENSG00000168228	4	25314407	25372005	131	16	24810	3.264	0.00054925	ZCCHC4
GGE	ENSG00000135213	7	75046066	75115548	5	1	23536	3.2615	0.00055409	POM121C
GGE	ENSG00000144821	3	108099216	108248169	267	30	24831	3.2554	0.00056607	MYH15
GGE	ENSG00000152413	5	78668459	78810040	173	16	24832	3.2551	0.00056667	HOMER1
GGE	ENSG00000144366	2	189156396	189460653	474	34	24548	3.2524	0.00057222	GULP1
GGE	ENSG00000148339	9	130830480	130871524	95	3	24891	3.2502	0.00057663	SLC25A25
GGE	ENSG00000164742	7	45613739	45762715	243	34	24539	3.2486	0.00057997	ADCY1
GGE	ENSG00000142046	19	41856816	41889988	45	5	24426	3.2484	0.0005803	TMEM91
GGE	ENSG00000174483	11	66278077	66301098	30	4	24920	3.2455	0.00058623	BBS1
GGE	ENSG00000114302	3	48782030	48885279	45	6	24780	3.2446	0.00058816	PRKAR2A
GGE	ENSG00000254986	11	66247484	66277130	43	4	24773	3.2425	0.00059239	DPP3
GGE	ENSG00000089094	12	121866900	122018920	19	3	24595	3.241	0.00059548	KDM2B
GGE	ENSG00000261701	16	72088522	72111145	38	9	24346	3.2376	0.0006028	HPR
GGE	ENSG00000157782	12	121078355	121105127	71	15	24536	3.236	0.00060619	CABP1
GGE	ENSG00000111481	12	54694986	54745633	15	2	24618	3.2355	0.00060716	COPZ1
GGE	ENSG00000111752	12	9066492	9094063	50	8	24882	3.2354	0.00060735	PHC1
GGE	ENSG00000177479	3	48956254	49023815	39	5	24861	3.2351	0.00060805	ARIH2
GGE	ENSG00000117020	1	243651535	244014381	322	18	24806	3.2339	0.00061065	AKT3
GGE	ENSG00000157538	21	38595721	38640262	79	16	24500	3.2334	0.00061158	DSCR3
GGE	ENSG00000171169	9	130823512	130830485	4	1	24800	3.2333	0.00061186	NAIF1
GGE	ENSG00000155886	9	19507450	19786926	524	63	24700	3.233	0.00061258	SLC24A2
GGE	ENSG00000049618	6	157099063	157531913	497	55	24693	3.2312	0.00061644	ARID1B
GGE	ENSG00000254505	14	24678789	24683075	1	1	24892	3.2308	0.0006173	CHMP4A
GGE	ENSG00000119771	2	23608088	23931481	731	93	24645	3.2307	0.00061746	KLHL29
GGE	ENSG00000063169	19	48111453	48206533	195	19	24516	3.2273	0.00062482	GLTSCR1
GGE	ENSG00000256349	11	66276550	66301084	33	4	24918	3.2271	0.00062522	CTD-3074O7.11
GGE	ENSG00000185634	15	49115932	49255641	188	30	24840	3.2258	0.0006281	SHC4
GGE	ENSG00000143850	1	204187979	204346793	382	36	24766	3.2255	0.00062885	PLEKHA6
GGE	ENSG00000109762	4	186125391	186291339	346	30	24680	3.2219	0.00063675	SNX25
GGE	ENSG00000214029	12	133694740	133707059	27	5	24323	3.2171	0.00064747	ZNF891
GGE	ENSG00000141295	17	45915058	45918699	7	3	24844	3.2127	0.00065737	SCRN2
GGE	ENSG00000258231	12	58937907	59206842	344	43	24701	3.2117	0.00065975	RP11-362K2.2
GGE	ENSG00000150637	18	67498394	67629039	119	15	24693	3.21	0.00066364	CD226
GGE	ENSG00000183751	16	2022038	2032934	5	1	24348	3.2031	0.00067979	TBL3
GGE	ENSG00000103510	16	31127075	31142714	19	3	24937	3.2026	0.00068096	KAT8
GGE	ENSG00000130702	20	60883011	60942368	68	7	24401	3.2018	0.00068284	LAMA5
GGE	ENSG00000165113	9	86354336	86444431	125	6	24881	3.2012	0.00068427	GKAP1
GGE	ENSG00000184672	8	85095022	85834079	1244	78	24621	3.2011	0.0006846	RALYL
GGE	ENSG00000075975	3	12598513	12625212	53	8	24786	3.2006	0.0006856	MKRN2
GGE	ENSG00000146122	6	39760142	39872648	183	25	24656	3.1996	0.00068814	DAAM2
GGE	ENSG00000197070	9	140500106	140509812	8	1	24606	3.1984	0.00069093	ARRDC1
GGE	ENSG00000102871	16	67188083	67194201	2	1	24306	3.196	0.00069665	TRADD
GGE	ENSG00000125991	20	34129770	34145405	24	3	24806	3.1916	0.00070749	ERGIC3
GGE	ENSG00000214595	2	54950636	55199157	677	92	24668	3.189	0.00071378	EML6
GGE	ENSG00000152520	13	28712643	28869475	168	12	24757	3.1888	0.00071435	PAN3
GGE	ENSG00000159723	16	67516474	67517716	3	2	24244	3.1878	0.00071674	AGRP
GGE	ENSG00000141384	18	23805900	23971649	333	28	24709	3.1859	0.00072141	TAF4B
GGE	ENSG00000203778	6	112408802	112423993	1	1	24993	3.1857	0.0007219	FAM229B
GGE	ENSG00000000460	1	169631245	169823221	664	39	24844	3.1788	0.00073952	C1orf112
GGE	ENSG00000159231	21	37507210	37518864	48	6	24830	3.1773	0.00074318	CBR3
GGE	ENSG00000172031	1	92495539	92529093	52	8	24673	3.1762	0.00074606	EPHX4
GGE	ENSG00000088543	3	50595462	50608458	8	3	24934	3.1747	0.00074991	C3orf18
GGE	ENSG00000148219	9	119187504	120177348	2359	228	24743	3.1724	0.000756	ASTN2
GGE	ENSG00000100601	14	78138747	78174363	120	16	24751	3.1676	0.00076859	ALKBH1
GGE	ENSG00000108278	17	34842473	34855154	11	3	24657	3.1662	0.00077218	ZNHIT3
GGE	ENSG00000133056	1	204391756	204463852	115	14	24750	3.1639	0.00077845	PIK3C2B
GGE	ENSG00000112893	5	109025067	109205326	507	31	24519	3.1619	0.00078359	MAN2A1
GGE	ENSG00000110442	11	36295051	36310999	41	7	24933	3.1594	0.00079041	COMMD9
GGE	ENSG00000108830	17	41177258	41184057	9	2	24641	3.1591	0.00079126	RND2
GGE	ENSG00000142619	1	17575593	17610728	122	18	24762	3.1542	0.00080469	PADI3
GGE	ENSG00000117868	7	158523686	158622944	318	14	24899	3.1539	0.00080558	ESYT2
GGE	ENSG00000151743	12	31824071	31882108	89	17	24668	3.1537	0.00080607	AMN1
GGE	ENSG00000185842	1	225083964	225586996	1271	48	24807	3.1527	0.0008087	DNAH14
GGE	ENSG00000005955	17	34900737	34946278	26	3	24793	3.1522	0.00081025	GGNBP2
GGE	ENSG00000185808	21	38431470	38445470	23	5	24714	3.1486	0.00082018	PIGP
GGE	ENSG00000170390	4	150999426	151178609	382	35	24781	3.1482	0.0008215	DCLK2
GGE	ENSG00000124588	6	2988221	3019996	89	15	24598	3.1467	0.00082555	NQO2
GGE	ENSG00000100926	14	24658349	24682679	32	6	24663	3.1433	0.0008353	TM9SF1
GGE	ENSG00000254692	14	24658363	24682679	32	6	24663	3.1433	0.0008353	TM9SF1
GGE	ENSG00000181690	8	57073463	57123883	37	3	24776	3.1409	0.00084221	PLAG1
GGE	ENSG00000205581	21	40714241	40721573	19	3	24720	3.1408	0.00084238	HMGN1
GGE	ENSG00000178252	3	49044495	49053386	5	2	24937	3.1396	0.00084597	WDR6
GGE	ENSG00000161654	17	42112003	42144987	34	8	24550	3.1378	0.00085123	LSM12
GGE	ENSG00000198171	20	3170996	3185331	42	8	24696	3.1364	0.00085506	DDRGK1
GGE	ENSG00000011304	19	797075	812327	3	1	24642	3.1356	0.00085762	PTBP1
GGE	ENSG00000137948	1	92414928	92479983	141	9	24741	3.1353	0.0008585	BRDT
GGE	ENSG00000214216	3	158680717	158984096	453	46	24823	3.1256	0.00088725	IQCJ
GGE	ENSG00000002746	7	43152198	43605600	973	128	24729	3.1251	0.00088873	HECW1
GGE	ENSG00000175216	11	46764598	46867847	82	9	24618	3.125	0.00088894	CKAP5
GGE	ENSG00000177106	11	694438	727727	16	6	24250	3.1248	0.00088953	EPS8L2
GGE	ENSG00000165140	9	97365415	97402531	106	14	24888	3.1248	0.00088963	FBP1
GGE	ENSG00000103653	15	75074398	75095539	26	5	24758	3.124	0.0008921	CSK
GGE	ENSG00000101546	18	77794358	77806397	37	5	24861	3.1222	0.00089763	RBFA
GGE	ENSG00000178467	3	49027319	49044587	8	2	24989	3.1207	0.00090197	P4HTM
GGE	ENSG00000174807	11	66081958	66084515	2	1	24554	3.118	0.00091048	CD248
GGE	ENSG00000068079	17	41158742	41166473	11	3	24697	3.1141	0.00092252	IFI35
GGE	ENSG00000067955	16	67063019	67134961	57	6	24600	3.1118	0.00092965	CBFB
GGE	ENSG00000181789	3	128968449	128996614	33	4	24671	3.1108	0.00093289	COPG1
GGE	ENSG00000159915	19	44754318	44779470	30	4	24735	3.1103	0.00093458	ZNF233
GGE	ENSG00000134697	1	38032417	38061536	46	7	24863	3.109	0.00093855	GNL2
GGE	ENSG00000011590	19	36195429	36207940	17	5	24584	3.1082	0.00094114	ZBTB32
GGE	ENSG00000130560	9	138824815	138853226	44	4	24671	3.108	0.00094166	UBAC1
GGE	ENSG00000158806	8	21881636	21894408	3	2	24559	3.106	0.00094815	NPM2
GGE	ENSG00000157388	3	53528683	53847760	489	78	24727	3.1038	0.00095511	CACNA1D
GGE	ENSG00000204740	10	19492779	20079330	1730	125	24773	3.1022	0.00096039	MALRD1
GGE	ENSG00000023318	9	102741461	102861322	149	10	24671	3.0993	0.00096992	ERP44
GGE	ENSG00000187144	1	16713612	16763919	62	11	24563	3.0988	0.00097155	SPATA21
GGE	ENSG00000198218	3	49067140	49131796	35	6	24755	3.0988	0.00097159	QRICH1
GGE	ENSG00000128512	7	111366166	111846466	512	82	24613	3.0982	0.00097335	DOCK4
GGE	ENSG00000055044	2	203130439	203168389	56	6	24710	3.0958	0.00098138	NOP58
GGE	ENSG00000154511	1	93307724	93427057	123	5	24919	3.0947	0.00098513	FAM69A
GGE	ENSG00000140939	16	67204057	67209643	2	1	24715	3.0927	0.00099169	NOL3
GGE	ENSG00000139531	12	56390964	56400425	6	2	24547	3.0903	0.00099967	SUOX
GGE	ENSG00000108091	10	61548521	61666414	303	25	24717	3.0892	0.0010034	CCDC6
GGE	ENSG00000166503	15	83784320	83876770	109	7	24821	3.0881	0.001007	HDGFRP3
GGE	ENSG00000164087	3	52109269	52188706	58	5	24882	3.0878	0.0010084	POC1A
GGE	ENSG00000166471	11	9302201	9336327	80	10	24795	3.0863	0.0010134	TMEM41B
GGE	ENSG00000125975	20	34111014	34117481	6	2	24720	3.0843	0.0010201	C20orf173
GGE	ENSG00000171720	5	141000443	141016437	25	8	24610	3.0843	0.0010202	HDAC3
GGE	ENSG00000161904	6	33738979	33756913	57	7	24902	3.0834	0.0010234	LEMD2
GGE	ENSG00000268223	5	115387163	115395815	36	2	24879	3.0815	0.0010297	ARL14EPL
GGE	ENSG00000079841	6	72596406	73112845	1072	58	24567	3.0813	0.0010305	RIMS1
GGE	ENSG00000084110	12	96366440	96390143	90	13	24817	3.0714	0.0010654	HAL
GGE	ENSG00000107186	9	13105703	13279589	141	13	24608	3.0711	0.0010662	MPDZ
GGE	ENSG00000110717	11	67798084	67804111	5	1	24585	3.0693	0.0010727	NDUFS8
GGE	ENSG00000177030	11	644233	706715	128	11	24460	3.0688	0.0010747	DEAF1
GGE	ENSG00000136014	12	95910336	95945266	50	11	24674	3.0612	0.0011023	USP44
GGE	ENSG00000136045	12	108079509	108106944	53	7	24891	3.0571	0.0011173	PWP1
GGE	ENSG00000143515	1	154298029	154323783	29	5	24946	3.0565	0.0011195	ATP8B2
GGE	ENSG00000166090	14	23842018	23845612	4	1	24783	3.0545	0.0011271	IL25
GGE	ENSG00000185666	22	32908539	33454358	1186	110	24773	3.0543	0.0011279	SYN3
GGE	ENSG00000119778	2	23971534	24149984	387	21	24750	3.0518	0.0011375	ATAD2B
GGE	ENSG00000242419	5	140864741	140892546	47	11	24714	3.0507	0.0011416	PCDHGC4
GGE	ENSG00000102780	13	42614176	42830714	573	47	24886	3.046	0.0011596	DGKH
GGE	ENSG00000197046	18	43405477	43424045	24	5	24625	3.0428	0.0011721	SIGLEC15
GGE	ENSG00000160299	21	47744036	47865682	381	28	24641	3.0421	0.0011747	PCNT
GGE	ENSG00000188404	1	169659808	169680839	75	12	24836	3.0417	0.0011761	SELL
GGE	ENSG00000142186	11	65292548	65306175	9	3	24679	3.0415	0.0011771	SCYL1
GGE	ENSG00000141664	18	60190240	60254942	124	16	24802	3.0399	0.0011833	ZCCHC2
GGE	ENSG00000125434	17	8191081	8198661	10	4	24487	3.0375	0.0011926	SLC25A35
GGE	ENSG00000174516	11	66234216	66244808	11	2	24798	3.0369	0.0011952	PELI3
GGE	ENSG00000119705	14	78174414	78227447	180	18	24760	3.0368	0.0011955	SLIRP
GGE	ENSG00000182450	11	64058774	64067503	3	1	24800	3.0355	0.0012008	KCNK4
GGE	ENSG00000111276	12	12867992	12875305	5	2	24686	3.0353	0.0012017	CDKN1B
GGE	ENSG00000140988	16	2012053	2014861	10	2	24546	3.0341	0.0012064	RPS2
GGE	ENSG00000100225	22	32870663	32894818	61	6	24838	3.0339	0.001207	FBXO7
GGE	ENSG00000049247	1	7903143	7913572	24	9	24620	3.0326	0.0012122	UTS2
GGE	ENSG00000167232	19	23487793	23578362	153	7	24602	3.0309	0.001219	ZNF91
GGE	ENSG00000105402	19	47990894	48018497	16	2	24592	3.0308	0.0012195	NAPA
GGE	ENSG00000130227	8	21777180	21864096	129	8	24868	3.0305	0.0012206	XPO7
GGE	ENSG00000198597	19	30719197	31204445	528	72	24500	3.0289	0.0012273	ZNF536
GGE	ENSG00000164142	4	152330368	152584784	380	13	24944	3.0242	0.0012464	FAM160A1
GGE	ENSG00000157837	12	121200313	121342174	338	24	24729	3.0229	0.0012517	SPPL3
GGE	ENSG00000178075	3	113547029	113666021	40	6	24822	3.0201	0.0012633	GRAMD1C
GGE	ENSG00000082641	17	46125691	46138849	18	5	24643	3.0175	0.0012743	NFE2L1
GGE	ENSG00000025770	22	50946645	50961901	5	2	24312	3.0165	0.0012785	NCAPH2
GGE	ENSG00000159917	19	44732882	44809199	81	7	24740	3.0162	0.0012797	ZNF235
GGE	ENSG00000163395	1	201159953	201198080	97	18	24672	3.0154	0.001283	IGFN1
GGE	ENSG00000196408	16	2028918	2034193	7	1	24517	3.0148	0.0012857	NOXO1
GGE	ENSG00000171222	20	34541539	34547394	13	3	24963	3.0144	0.0012875	SCAND1
GGE	ENSG00000137872	15	47476298	48066420	1375	99	24626	3.0143	0.0012878	SEMA6D
GGE	ENSG00000089639	19	19740285	19754476	10	3	24405	3.0082	0.0013141	GMIP
GGE	ENSG00000127124	1	41972036	42501596	880	90	24664	3.0067	0.0013206	HIVEP3
GGE	ENSG00000171224	10	71390007	71393352	7	1	24516	3.0052	0.0013271	C10orf35
GGE	ENSG00000100603	14	78183942	78227550	144	16	24755	3.0046	0.0013296	SNW1
GGE	ENSG00000178537	3	48894369	48936426	20	3	24914	3.0031	0.0013363	SLC25A20
GGE	ENSG00000114735	3	50606583	50622366	12	3	24823	3.0023	0.0013399	HEMK1
GGE	ENSG00000067560	3	49396578	49450431	69	7	24843	3.0013	0.0013444	RHOA
GGE	ENSG00000181982	4	24807739	24981826	356	42	24839	2.9988	0.0013554	CCDC149
GGE	ENSG00000107859	10	103989943	104001231	17	2	24830	2.9975	0.0013609	PITX3
GGE	ENSG00000165891	12	77415027	77459360	84	20	24672	2.9952	0.0013714	E2F7
GGE	ENSG00000183624	3	128997671	129025029	39	3	24675	2.9948	0.0013732	HMCES
GGE	ENSG00000102931	16	57279010	57287516	11	3	24489	2.9935	0.0013791	ARL2BP
GGE	ENSG00000101745	18	9136226	9285983	233	15	24799	2.9908	0.0013912	ANKRD12
GGE	ENSG00000078403	10	21823094	22032559	72	13	24510	2.9869	0.0014093	MLLT10
GGE	ENSG00000167904	8	56608983	56685966	122	13	24689	2.9837	0.0014241	TMEM68
GGE	ENSG00000132170	3	12328867	12475855	252	22	24760	2.9826	0.0014289	PPARG
GGE	ENSG00000118557	16	72146056	72210777	137	16	24661	2.9824	0.00143	PMFBP1
GGE	ENSG00000181847	3	113995760	114029135	23	5	24649	2.9802	0.0014402	TIGIT
GGE	ENSG00000140526	15	89630690	89745591	144	17	24645	2.9791	0.0014455	ABHD2
GGE	ENSG00000158528	7	94536514	94925727	478	39	24847	2.9788	0.001447	PPP1R9A
GGE	ENSG00000159720	16	67471917	67515140	31	6	24553	2.9788	0.001447	ATP6V0D1
GGE	ENSG00000139160	12	31800094	31826048	43	13	24414	2.9785	0.0014481	METTL20
GGE	ENSG00000141349	17	42148103	42153709	7	3	24731	2.9762	0.0014594	G6PC3
GGE	ENSG00000120159	9	26840683	26892802	78	11	24574	2.9759	0.0014607	CAAP1
GGE	ENSG00000172938	11	68747490	68748455	1	1	24810	2.9742	0.001469	MRGPRD
GGE	ENSG00000164078	3	49924435	49941299	17	3	24989	2.9724	0.0014774	MST1R
GGE	ENSG00000131504	5	140894583	140998622	130	20	24754	2.9697	0.0014907	DIAPH1
GGE	ENSG00000162302	11	64126620	64139687	17	3	24795	2.9669	0.0015041	RPS6KA4
GGE	ENSG00000214078	20	34213953	34252878	73	7	24887	2.964	0.0015186	CPNE1
GGE	ENSG00000215912	1	2567415	2718286	35	3	24721	2.9623	0.0015267	TTC34
GGE	ENSG00000000457	1	169818772	169863408	102	10	24779	2.9603	0.0015365	SCYL3
GGE	ENSG00000127415	4	980785	998316	7	2	24346	2.9599	0.0015389	IDUA
GGE	ENSG00000101098	20	43380449	43438979	32	3	24717	2.9578	0.0015492	RIMS4
GGE	ENSG00000123607	2	166713985	166810353	146	17	24891	2.9577	0.0015495	TTC21B
GGE	ENSG00000102539	13	49794474	49796513	2	1	24656	2.956	0.0015584	MLNR
GGE	ENSG00000159713	16	67423712	67427438	8	3	24443	2.9548	0.0015642	TPPP3
GGE	ENSG00000004534	3	49977440	50137478	194	10	24922	2.9533	0.001572	RBM6
GGE	ENSG00000083782	12	91357456	91398803	93	9	24761	2.9525	0.0015762	EPYC
GGE	ENSG00000164168	4	148538534	148593195	3	2	24062	2.9522	0.0015776	TMEM184C
GGE	ENSG00000100234	22	33197687	33259030	103	22	24801	2.9496	0.0015911	TIMP3
GGE	ENSG00000157445	3	54156574	55108584	1796	206	24751	2.9489	0.0015946	CACNA2D3
GGE	ENSG00000205339	11	9406169	9469673	70	7	24681	2.9486	0.001596	IPO7
GGE	ENSG00000163877	1	38000050	38019903	33	7	24813	2.9475	0.0016018	SNIP1
GGE	ENSG00000178127	18	9102628	9134343	43	6	24682	2.9474	0.0016021	NDUFV2
GGE	ENSG00000269858	19	41304901	41314338	10	4	24293	2.9473	0.001603	EGLN2
GGE	ENSG00000031698	1	109756540	109780791	26	6	24588	2.9455	0.0016124	SARS
GGE	ENSG00000174165	11	66288108	66313709	37	4	24837	2.9442	0.0016188	ZDHHC24
GGE	ENSG00000174799	4	56815037	56899529	132	16	24616	2.9437	0.0016214	CEP135
GGE	ENSG00000136404	15	83776159	83813606	33	5	24743	2.9354	0.0016657	TM6SF1
GGE	ENSG00000152061	1	174128548	174964445	1166	31	24618	2.9346	0.0016696	RABGAP1L
GGE	ENSG00000139187	12	9102640	9163356	117	8	24862	2.9341	0.0016727	KLRG1
GGE	ENSG00000166478	11	9481866	9550071	60	6	24591	2.9329	0.001679	ZNF143
GGE	ENSG00000174672	11	1411129	1483919	31	3	24361	2.9294	0.0016982	BRSK2
GGE	ENSG00000070882	7	24836158	25021253	405	70	24561	2.9292	0.0016989	OSBPL3
GGE	ENSG00000176463	15	92396925	92715665	704	93	24639	2.9284	0.0017035	SLCO3A1
GGE	ENSG00000172824	16	67022492	67043661	10	3	24469	2.9278	0.0017067	CES4A
GGE	ENSG00000180644	10	72357104	72362531	10	4	24764	2.9273	0.0017097	PRF1
GGE	ENSG00000244462	20	34236847	34252878	32	5	24887	2.926	0.0017168	RBM12
GGE	ENSG00000184897	3	129033615	129035120	4	1	24834	2.9258	0.0017181	H1FX
GGE	ENSG00000183826	6	38136227	38607924	837	90	24748	2.9222	0.001738	BTBD9
GGE	ENSG00000164086	3	52082935	52090566	3	2	24845	2.9205	0.0017471	DUSP7
GGE	ENSG00000178149	3	49052921	49059726	4	2	24562	2.9201	0.0017498	DALRD3
GGE	ENSG00000065361	12	56473641	56497289	14	3	24461	2.9197	0.0017518	ERBB3
GGE	ENSG00000160818	1	156564279	156571288	30	2	24975	2.9196	0.0017526	GPATCH4
GGE	ENSG00000168701	16	67261006	67263181	1	1	24618	2.9183	0.00176	TMEM208
GGE	ENSG00000081791	5	141303373	141321612	26	3	24822	2.9171	0.0017663	KIAA0141
GGE	ENSG00000068878	2	54091204	54197977	237	20	24765	2.9148	0.0017794	PSME4
GGE	ENSG00000173402	3	49506146	49573048	75	7	24808	2.9146	0.0017808	DAG1
GGE	ENSG00000122971	12	121163538	121177811	28	6	24454	2.914	0.0017842	ACADS
GGE	ENSG00000006534	11	67776048	67796744	40	5	24681	2.9136	0.0017866	ALDH3B1
GGE	ENSG00000127554	16	2034208	2037750	7	1	24598	2.9134	0.0017879	GFER
GGE	ENSG00000160007	19	47421933	47508334	50	5	24567	2.913	0.0017899	ARHGAP35
GGE	ENSG00000107819	10	102790991	102800998	1	1	24663	2.9126	0.001792	SFXN3
GGE	ENSG00000176787	11	5079880	5080857	5	2	24984	2.9109	0.0018018	OR52E2
GGE	ENSG00000153317	8	131064353	131455906	966	65	24733	2.9093	0.0018114	ASAP1
GGE	ENSG00000107295	9	17579080	17797127	803	83	24628	2.9086	0.0018155	SH3GL2
GGE	ENSG00000151577	3	113847499	113918254	156	25	24614	2.9071	0.0018237	DRD3
GGE	ENSG00000028528	15	64386322	64438289	62	7	24563	2.9063	0.0018284	SNX1
GGE	ENSG00000124207	20	47662849	47713489	78	7	24843	2.9035	0.0018449	CSE1L
GGE	ENSG00000137574	8	56685701	56738007	110	8	24745	2.9017	0.0018557	TGS1
GGE	ENSG00000160298	21	47720095	47743789	56	12	24662	2.9006	0.001862	C21orf58
GGE	ENSG00000197557	2	178477720	178483694	31	5	24755	2.9003	0.0018643	TTC30A
GGE	ENSG00000059915	10	104162376	104181296	14	6	24589	2.8993	0.0018698	PSD
GGE	ENSG00000111540	12	56367697	56388490	29	4	24672	2.8975	0.0018808	RAB5B
GGE	ENSG00000110344	11	118230300	118269926	16	3	24558	2.8957	0.0018918	UBE4A
GGE	ENSG00000145029	3	49460379	49466759	7	4	24374	2.8944	0.0018995	NICN1
GGE	ENSG00000128791	18	9334765	9402418	161	12	24783	2.8938	0.0019029	TWSG1
GGE	ENSG00000131051	20	34291531	34330234	87	5	24950	2.8936	0.001904	RBM39
GGE	ENSG00000240764	5	140868808	140892546	43	10	24715	2.8921	0.0019131	PCDHGC5
GGE	ENSG00000185627	11	236546	252983	57	6	24684	2.8892	0.0019313	PSMD13
GGE	ENSG00000186648	14	24521206	24538937	3	2	24676	2.8877	0.0019406	LRRC16B
GGE	ENSG00000149806	11	64888100	64889945	2	1	24831	2.8871	0.0019438	FAU
GGE	ENSG00000140650	16	8882680	8943188	190	22	24661	2.8865	0.001948	PMM2
GGE	ENSG00000176476	16	28565236	28603111	32	4	24782	2.8862	0.0019499	CCDC101
GGE	ENSG00000174738	3	23986751	24022109	65	9	24731	2.8856	0.0019535	NR1D2
GGE	ENSG00000184886	17	34890847	34895159	2	1	24665	2.8834	0.0019667	PIGW
GGE	ENSG00000120837	12	104510855	104532067	33	8	24772	2.8831	0.0019692	NFYB
GGE	ENSG00000196151	2	160092304	160143310	177	14	24809	2.883	0.0019697	WDSUB1
GGE	ENSG00000172728	8	33228342	33330940	212	16	24672	2.881	0.0019822	FUT10
GGE	ENSG00000268173	19	18263968	18288927	25	4	24393	2.8804	0.0019861	PIK3R2
GGE	ENSG00000213339	19	10812106	10824113	17	4	24198	2.8779	0.0020019	QTRT1
GGE	ENSG00000135740	16	67271586	67306093	20	3	24735	2.8777	0.0020031	SLC9A5
GGE	ENSG00000163075	2	120302008	120419827	119	11	24360	2.8763	0.0020121	PCDP1
GGE	ENSG00000187556	19	13972877	13991571	1	1	24685	2.876	0.002014	NANOS3
GGE	ENSG00000134758	18	29671818	29711524	63	9	24816	2.8679	0.0020658	RNF138
GGE	ENSG00000140416	15	63334831	63364114	68	9	24795	2.8655	0.0020818	TPM1
GGE	ENSG00000163428	3	120043356	120068186	56	8	24761	2.8646	0.0020879	LRRC58
GGE	ENSG00000148798	10	105036920	105050108	14	3	24727	2.8616	0.0021076	INA
GGE	ENSG00000108375	17	56429861	56494956	90	13	24763	2.8594	0.0021221	RNF43
GGE	ENSG00000169193	7	23636998	23684327	49	7	24790	2.8587	0.0021267	CCDC126
GGE	ENSG00000159714	16	67428322	67450736	24	5	24442	2.8558	0.0021464	ZDHHC1
GGE	ENSG00000176887	2	5832799	5841516	3	1	24418	2.8557	0.0021471	SOX11
GGE	ENSG00000055070	1	16679070	16724640	68	7	24692	2.8556	0.0021478	SZRD1
GGE	ENSG00000162300	11	64851695	64855870	2	1	24946	2.8526	0.002168	ZFPL1
GGE	ENSG00000080371	12	72148654	72184699	28	4	24800	2.8501	0.0021855	RAB21
GGE	ENSG00000105135	19	15225795	15236596	7	2	24422	2.8491	0.0021921	ILVBL
GGE	ENSG00000102890	16	67233014	67237932	5	2	24749	2.8481	0.002199	ELMO3
GGE	ENSG00000157765	4	25656923	25680370	2	1	24874	2.8454	0.0022176	SLC34A2
GGE	ENSG00000163995	4	7967039	8160559	245	55	24570	2.8448	0.0022218	ABLIM2
GGE	ENSG00000204308	6	32146131	32151930	3	2	24505	2.8441	0.0022269	RNF5
GGE	ENSG00000174748	3	23958036	23965183	8	3	24747	2.8426	0.0022374	RPL15
GGE	ENSG00000119720	14	90742580	90798481	78	9	24834	2.8425	0.0022379	NRDE2
GGE	ENSG00000103184	16	5008318	5069159	130	16	24567	2.8422	0.0022403	SEC14L5
GGE	ENSG00000139567	12	52300692	52317145	25	5	24674	2.8406	0.0022515	ACVRL1
GGE	ENSG00000130957	9	97321002	97356075	123	10	24782	2.8387	0.0022652	FBP2
GGE	ENSG00000065618	10	105791044	105845760	50	8	24732	2.8382	0.0022682	COL17A1
GGE	ENSG00000083544	13	60970591	61148012	247	16	24827	2.8371	0.0022761	TDRD3
GGE	ENSG00000257017	16	72088491	72094954	7	3	24099	2.8362	0.0022828	HP
GGE	ENSG00000141837	19	13317256	13734804	368	61	24494	2.832	0.0023131	CACNA1A
GGE	ENSG00000225526	3	12556433	12602558	111	11	24667	2.8252	0.0023624	C3orf83
GGE	ENSG00000175787	9	97021593	97063736	130	16	24861	2.8249	0.0023649	ZNF169
GGE	ENSG00000136159	13	48611703	48621358	17	5	24742	2.8242	0.0023696	NUDT15
GGE	ENSG00000108439	17	46018872	46025654	12	5	24654	2.8234	0.0023757	PNPO
GGE	ENSG00000096395	6	33762450	33771788	31	7	24909	2.8228	0.0023799	MLN
GGE	ENSG00000205495	11	5067756	5068691	7	2	25010	2.8197	0.0024031	OR52J3
GGE	ENSG00000167962	16	2047655	2059824	14	1	24722	2.819	0.0024087	ZNF598
GGE	ENSG00000075151	1	21132963	21503377	525	28	24462	2.8181	0.0024155	EIF4G3
GGE	ENSG00000181744	3	143690640	143767561	147	11	24490	2.8177	0.0024184	C3orf58
GGE	ENSG00000131469	17	41150290	41154976	7	2	24720	2.8172	0.0024224	RPL27
GGE	ENSG00000117154	1	18434240	18704977	389	68	24665	2.8164	0.0024285	IGSF21
GGE	ENSG00000102858	16	4666494	4740975	88	9	24133	2.8156	0.0024339	MGRN1
GGE	ENSG00000171174	2	28004231	28113965	132	8	24736	2.8136	0.0024492	RBKS
GGE	ENSG00000164169	4	148558936	148605381	1	1	22613	2.813	0.002454	PRMT10
GGE	ENSG00000179603	7	126078652	126893348	1662	101	24871	2.8093	0.0024828	GRM8
GGE	ENSG00000157617	21	43305221	43373999	59	17	24670	2.8076	0.0024953	C2CD2
GGE	ENSG00000115109	2	120770581	120936695	207	8	24753	2.8051	0.0025151	EPB41L5
GGE	ENSG00000002549	4	17578815	17609595	50	2	24669	2.8045	0.0025194	LAP3
GGE	ENSG00000126106	1	45100910	45140227	42	2	24684	2.8007	0.0025497	TMEM53
GGE	ENSG00000167552	12	49578579	49583107	3	1	24833	2.8004	0.0025516	TUBA1A
GGE	ENSG00000173621	11	66624118	66627946	2	1	24927	2.7975	0.002575	LRFN4
GGE	ENSG00000165688	9	139305110	139318213	35	7	24639	2.797	0.0025791	PMPCA
GGE	ENSG00000171570	19	41284147	41314103	61	12	24306	2.7954	0.0025915	RAB4B-EGLN2
GGE	ENSG00000125971	20	33104214	33128762	12	2	24919	2.792	0.0026195	DYNLRB1
GGE	ENSG00000243147	2	27994584	28210954	229	12	24726	2.7918	0.0026208	MRPL33
GGE	ENSG00000170777	9	6328349	6331900	6	3	24966	2.7913	0.0026245	TPD52L3
GGE	ENSG00000138483	3	107096188	107097481	4	2	23956	2.7907	0.0026297	CCDC54
GGE	ENSG00000164694	6	159590429	159693141	285	16	24822	2.788	0.0026515	FNDC1
GGE	ENSG00000177042	11	695428	705028	10	4	24258	2.7872	0.0026582	TMEM80
GGE	ENSG00000198464	19	52800430	52829175	30	5	24208	2.7839	0.0026851	ZNF480
GGE	ENSG00000140525	15	89787180	89860492	85	6	24762	2.7833	0.0026906	FANCI
GGE	ENSG00000115947	2	148687968	148779147	99	8	24680	2.7822	0.0026996	ORC4
GGE	ENSG00000156463	5	145316142	145461354	90	8	24736	2.7813	0.0027069	SH3RF2
GGE	ENSG00000213160	2	170550998	170633499	285	35	24731	2.7811	0.0027087	KLHL23
GGE	ENSG00000134954	11	128328656	128457453	184	39	24710	2.7792	0.0027248	ETS1
GGE	ENSG00000140678	16	31366455	31394318	15	4	24473	2.7767	0.002746	ITGAX
GGE	ENSG00000166189	10	103825147	103827792	1	1	24675	2.7765	0.002747	HPS6
GGE	ENSG00000125246	13	100258919	100549387	458	64	24661	2.774	0.0027684	CLYBL
GGE	ENSG00000198909	17	61699775	61773663	54	3	24877	2.7708	0.0027955	MAP3K3
GGE	ENSG00000128594	7	127667124	127672160	4	2	24908	2.7694	0.0028079	LRRC4
GGE	ENSG00000197734	14	78227173	78236085	29	7	24798	2.7693	0.002809	C14orf178
GGE	ENSG00000162989	2	155554811	155714863	272	37	24713	2.7651	0.0028452	KCNJ3
GGE	ENSG00000121989	2	148602086	148688393	72	8	24776	2.765	0.0028461	ACVR2A
GGE	ENSG00000162551	1	21835858	21904905	231	26	24724	2.7642	0.0028527	ALPL
GGE	ENSG00000081913	18	60382672	60647666	303	24	24560	2.7631	0.0028626	PHLPP1
GGE	ENSG00000129282	17	34958001	34965407	1	1	24794	2.7611	0.00288	MRM1
GGE	ENSG00000130204	19	45393826	45406946	7	1	24238	2.7608	0.0028827	TOMM40
GGE	ENSG00000171806	1	169761670	169764107	4	2	24870	2.7583	0.0029054	METTL18
GGE	ENSG00000244754	13	33006554	33112970	98	11	24741	2.755	0.002935	N4BP2L2
GGE	ENSG00000127419	4	926175	952444	37	7	24635	2.7525	0.0029569	TMEM175
GGE	ENSG00000118898	16	4932508	5010742	56	10	24465	2.751	0.0029707	PPL
GGE	ENSG00000127483	1	21069154	21113816	70	10	24355	2.7499	0.0029811	HP1BP3
GGE	ENSG00000173933	11	66384097	66434153	28	6	24841	2.7451	0.0030248	RBM4
GGE	ENSG00000143147	1	168053997	168106821	75	9	24775	2.7441	0.003034	GPR161
GGE	ENSG00000089177	20	16252749	16554078	928	96	24762	2.7423	0.0030504	KIF16B
GGE	ENSG00000138621	15	75315896	75409803	131	13	24733	2.7394	0.0030773	PPCDC
GGE	ENSG00000040933	2	99061317	99210853	50	5	24672	2.7392	0.0030797	INPP4A
GGE	ENSG00000183971	16	2059927	2070756	1	1	24658	2.7376	0.003094	NPW
GGE	ENSG00000119523	9	101978708	101984238	7	1	24468	2.7376	0.0030942	ALG2
GGE	ENSG00000115665	2	108602979	108630450	36	10	24678	2.7357	0.0031124	SLC5A7
GGE	ENSG00000144771	3	54952264	55001115	93	11	24754	2.7351	0.003118	LRTM1
GGE	ENSG00000148110	9	97136833	97223324	146	14	24690	2.7333	0.0031347	HIATL1
GGE	ENSG00000164076	3	49895421	49907655	13	3	24922	2.7286	0.0031803	CAMKV
GGE	ENSG00000079156	2	179059208	179264160	436	52	24636	2.7276	0.0031903	OSBPL6
GGE	ENSG00000137413	6	42018251	42055199	55	9	24622	2.7268	0.0031975	TAF8
GGE	ENSG00000048052	7	18126572	19042039	1282	134	24705	2.7256	0.0032092	HDAC9
GGE	ENSG00000139610	12	51722227	51740463	28	5	24907	2.7251	0.003214	CELA1
GGE	ENSG00000102606	13	111766906	111958084	356	41	24358	2.7241	0.0032238	ARHGEF7
GGE	ENSG00000205279	5	126984736	126994322	5	2	24455	2.7225	0.0032392	CTXN3
GGE	ENSG00000099385	16	30844947	30906281	39	3	24694	2.7221	0.0032431	BCL7C
GGE	ENSG00000131373	3	15602211	15643338	38	9	24386	2.7217	0.0032469	HACL1
GGE	ENSG00000196776	3	107762145	107809872	56	9	24616	2.72	0.0032637	CD47
GGE	ENSG00000187987	6	28399707	28411279	31	6	24852	2.7188	0.0032757	ZSCAN23
GGE	ENSG00000160654	11	118215059	118225876	16	3	24555	2.7183	0.0032809	CD3G
GGE	ENSG00000124493	6	33989628	34123399	180	21	24497	2.7173	0.0032909	GRM4
GGE	ENSG00000130943	22	46651560	46659219	24	2	24401	2.717	0.0032938	PKDREJ
GGE	ENSG00000171827	19	37958487	37976260	15	2	24781	2.7168	0.0032954	ZNF570
GGE	ENSG00000197748	10	105889646	105992120	173	18	24875	2.716	0.003304	WDR96
GGE	ENSG00000145949	6	2663863	2751200	313	35	24812	2.7159	0.0033047	MYLK4
GGE	ENSG00000120458	11	124636394	124670569	34	7	24660	2.7141	0.0033231	MSANTD2
GGE	ENSG00000007908	1	169691781	169733846	234	14	24879	2.7137	0.0033271	SELE
GGE	ENSG00000167397	16	31102163	31107301	3	1	24826	2.7132	0.0033323	VKORC1
GGE	ENSG00000126524	7	66452664	66460588	5	1	23968	2.7098	0.0033663	SBDS
GGE	ENSG00000005961	17	42449548	42466873	8	2	24611	2.707	0.0033943	ITGA2B
GGE	ENSG00000141279	17	45600308	45700642	79	8	24613	2.704	0.0034255	NPEPPS
GGE	ENSG00000115446	2	99225042	99234978	10	1	24888	2.7036	0.0034296	UNC50
GGE	ENSG00000179241	11	35965531	36253686	555	73	24750	2.7029	0.0034364	LDLRAD3
GGE	ENSG00000170425	17	15848231	15879060	12	3	24612	2.7026	0.0034402	ADORA2B
GGE	ENSG00000118156	19	48023942	48059113	12	2	24538	2.7013	0.0034538	ZNF541
GGE	ENSG00000152942	5	68665120	68710628	37	2	24926	2.7011	0.0034552	RAD17
GGE	ENSG00000065883	7	39989636	40136733	181	15	24811	2.7008	0.0034583	CDK13
GGE	ENSG00000159692	4	1205236	1243741	96	11	24803	2.7008	0.003459	CTBP1
GGE	ENSG00000134698	1	36273773	36323491	30	5	24657	2.6995	0.0034727	AGO4
GGE	ENSG00000163218	1	153302596	153321316	65	6	24889	2.6988	0.003479	PGLYRP4
GGE	ENSG00000055955	3	52846991	52865495	28	5	24910	2.6976	0.0034919	ITIH4
GGE	ENSG00000148346	9	130911350	130915734	4	2	24710	2.6973	0.0034957	LCN2
GGE	ENSG00000196936	1	248112160	248113098	4	2	24668	2.6947	0.003523	OR2L8
GGE	ENSG00000123416	12	49521565	49525180	2	1	24659	2.6926	0.0035445	TUBA1B
GGE	ENSG00000164744	7	48026745	48068716	50	3	24835	2.692	0.0035508	SUN3
GGE	ENSG00000106328	7	127231463	127242198	20	5	24657	2.6912	0.0035599	FSCN3
GGE	ENSG00000213782	12	12966250	12982915	11	3	24584	2.6904	0.003568	DDX47
GGE	ENSG00000100101	22	38077680	38170137	128	15	24508	2.6854	0.0036225	NOL12
GGE	ENSG00000248383	5	140306302	140391929	92	6	24783	2.6849	0.0036274	PCDHAC1
GGE	ENSG00000175906	17	41476327	41478505	4	2	24673	2.6833	0.0036451	ARL4D
GGE	ENSG00000175970	12	121148238	121161443	38	8	24411	2.6822	0.0036567	UNC119B
GGE	ENSG00000263020	6	31633879	31641323	9	4	24574	2.6819	0.0036605	CSNK2B-LY6G5B-1181
GGE	ENSG00000118162	19	47978401	47987525	2	1	24660	2.6805	0.0036755	KPTN
GGE	ENSG00000159761	16	67700719	67702661	1	1	23550	2.6783	0.0037	C16orf86
GGE	ENSG00000177963	11	207511	215113	18	6	24749	2.6767	0.0037179	RIC8A
GGE	ENSG00000255302	15	49170083	49172380	1	1	25012	2.6766	0.003719	EID1
GGE	ENSG00000127561	16	2039661	2044276	3	1	24883	2.6748	0.003739	SYNGR3
GGE	ENSG00000078747	20	32951041	33099198	115	4	24884	2.6733	0.0037555	ITCH
GGE	ENSG00000197372	19	23708433	23870022	310	23	24460	2.6689	0.0038045	ZNF675
GGE	ENSG00000011295	17	15902694	15948329	77	7	24866	2.6675	0.0038214	TTC19
GGE	ENSG00000204138	1	28696114	28826881	287	8	24753	2.6659	0.0038394	PHACTR4
GGE	ENSG00000159792	16	67927175	67963581	25	4	24255	2.6645	0.0038552	PSKH1
GGE	ENSG00000136457	17	48541857	48546327	7	2	24521	2.6639	0.0038625	CHAD
GGE	ENSG00000172046	3	49145479	49158371	6	1	24998	2.6634	0.0038673	USP19
GGE	ENSG00000141140	17	34851477	34899284	31	6	24652	2.6615	0.0038901	MYO19
GGE	ENSG00000089154	12	120565007	120632513	54	3	24782	2.6614	0.0038912	GCN1L1
GGE	ENSG00000196456	7	150065879	150109558	47	5	24521	2.6597	0.0039106	ZNF775
GGE	ENSG00000114166	3	20081515	20195896	374	39	24821	2.6593	0.0039155	KAT2B
GGE	ENSG00000177352	3	49199968	49203754	3	1	24958	2.6584	0.0039261	CCDC71
GGE	ENSG00000153208	2	112656056	112787138	347	18	24749	2.656	0.003954	MERTK
GGE	ENSG00000156374	10	105062553	105110891	37	6	24751	2.6553	0.003962	PCGF6
GGE	ENSG00000112137	6	12717893	13288645	957	85	24817	2.6526	0.003994	PHACTR1
GGE	ENSG00000165966	12	41582250	41968392	1057	55	24685	2.6516	0.004005	PDZRN4
GGE	ENSG00000128274	22	43088127	43117304	100	15	24595	2.6504	0.00402	A4GALT
GGE	ENSG00000142513	19	51293672	51298481	2	1	24637	2.6482	0.0040457	ACPT
GGE	ENSG00000150394	16	61681146	62070939	526	49	24659	2.6466	0.0040657	CDH8
GGE	ENSG00000159674	4	1160720	1202750	60	13	24558	2.6465	0.0040667	SPON2
GGE	ENSG00000181666	19	37803739	37860267	69	7	24691	2.6459	0.0040735	HKR1
GGE	ENSG00000111554	12	68666223	68726161	61	10	24730	2.6452	0.0040818	MDM1
GGE	ENSG00000184489	8	142402093	142441620	61	9	24581	2.6432	0.0041062	PTP4A3
GGE	ENSG00000141994	19	5784843	5791249	10	1	24495	2.6417	0.0041249	DUS3L
GGE	ENSG00000164494	6	107473761	107780768	462	47	24798	2.64	0.0041457	PDSS2
GGE	ENSG00000144229	2	137523115	138435287	1992	169	24727	2.6399	0.0041467	THSD7B
GGE	ENSG00000121898	10	125465723	125699783	330	50	24582	2.6396	0.0041506	CPXM2
GGE	ENSG00000061918	4	156680144	156728743	40	7	24633	2.6385	0.0041631	GUCY1B3
GGE	ENSG00000196569	6	129204342	129837714	1131	84	24702	2.6381	0.0041686	LAMA2
GGE	ENSG00000178722	5	60933535	61047590	286	33	24842	2.638	0.0041704	C5orf64
GGE	ENSG00000155749	2	202152994	202222121	124	14	24726	2.6368	0.0041842	ALS2CR12
GGE	ENSG00000169594	15	83924655	83953466	27	4	24730	2.6365	0.0041878	BNC1
GGE	ENSG00000107242	9	71320575	71624092	504	50	24753	2.6342	0.0042163	PIP5K1B
GGE	ENSG00000140521	15	89859534	89878092	19	3	24837	2.6339	0.0042207	POLG
GGE	ENSG00000136636	1	215740735	215795149	13	4	24461	2.6333	0.0042281	KCTD3
GGE	ENSG00000166598	12	104323885	104347423	85	16	24801	2.633	0.0042311	HSP90B1
GGE	ENSG00000182985	11	115039938	115375675	380	56	24736	2.6328	0.0042338	CADM1
GGE	ENSG00000105668	19	36157715	36169367	24	5	24538	2.6322	0.0042416	UPK1A
GGE	ENSG00000149131	11	57364860	57382326	30	3	24970	2.6301	0.0042682	SERPING1
GGE	ENSG00000206560	3	15708743	15901278	266	13	24904	2.6287	0.0042857	ANKRD28
GGE	ENSG00000102981	16	67694849	67696681	1	1	23317	2.6282	0.004292	PARD6A
GGE	ENSG00000121766	1	31769842	31837783	117	7	24862	2.628	0.0042949	ZCCHC17
GGE	ENSG00000197651	12	91299399	91348953	69	12	24497	2.6279	0.0042953	CCER1
GGE	ENSG00000162493	1	13909960	13944452	42	11	24604	2.6264	0.0043143	PDPN
GGE	ENSG00000108510	17	60019966	60142643	85	7	24557	2.6226	0.0043625	MED13
GGE	ENSG00000164077	3	49946302	49967606	14	3	24871	2.6216	0.0043758	MON1A
GGE	ENSG00000169282	3	155755490	156256545	1023	83	24450	2.6207	0.004388	KCNAB1
GGE	ENSG00000102878	16	67197288	67203848	2	1	24519	2.6186	0.0044141	HSF4
GGE	ENSG00000133612	7	150782918	150841523	58	8	24512	2.6175	0.0044285	AGAP3
GGE	ENSG00000178761	15	75192328	75199462	9	3	24472	2.6166	0.0044408	FAM219B
GGE	ENSG00000178904	19	32896449	32976801	117	14	24503	2.6159	0.0044503	DPY19L3
GGE	ENSG00000114737	3	50643921	50649262	6	3	24139	2.6148	0.0044639	CISH
GGE	ENSG00000154743	3	12525931	12581122	143	11	24695	2.6143	0.0044709	TSEN2
GGE	ENSG00000198728	10	103867317	103880210	12	4	24313	2.6139	0.0044754	LDB1
GGE	ENSG00000152518	2	43449541	43453748	3	2	24140	2.6131	0.0044865	ZFP36L2
GGE	ENSG00000178718	15	75246757	75249805	1	1	24448	2.6122	0.004498	RPP25
GGE	ENSG00000196437	19	37902057	37960177	63	7	24708	2.6091	0.0045395	ZNF569
GGE	ENSG00000068976	11	64513861	64527769	15	2	24690	2.608	0.0045531	PYGM
GGE	ENSG00000130222	9	92219928	92221470	1	1	24917	2.6072	0.004564	GADD45G
GGE	ENSG00000173838	17	60778675	60885705	144	9	24615	2.6062	0.0045776	2010-03-01
GGE	ENSG00000135723	16	67263290	67281561	14	3	24663	2.6056	0.004585	FHOD1
GGE	ENSG00000103507	16	31117428	31124110	5	2	24805	2.6051	0.0045923	BCKDK
GGE	ENSG00000062650	10	88195013	88281572	156	17	24749	2.6037	0.0046107	WAPAL
GGE	ENSG00000102901	16	67862060	67881714	17	4	24228	2.6015	0.0046403	CENPT
GGE	ENSG00000172037	3	49158547	49170551	3	2	24710	2.6014	0.0046416	LAMB2
GGE	ENSG00000160551	17	27717482	27878922	205	12	24895	2.6008	0.0046502	TAOK1
GGE	ENSG00000163382	1	156561554	156564091	9	1	24983	2.5997	0.0046658	APOA1BP
GGE	ENSG00000135956	2	96914254	96931732	10	4	24533	2.5996	0.0046665	TMEM127
GGE	ENSG00000145819	5	142149949	142608576	533	55	24707	2.5981	0.0046866	ARHGAP26
GGE	ENSG00000108506	17	59942731	60005377	64	7	24802	2.5967	0.0047065	INTS2
GGE	ENSG00000156265	21	30449792	30548210	262	22	24889	2.5958	0.0047192	MAP3K7CL
GGE	ENSG00000153558	3	33318517	33445154	195	17	24434	2.5956	0.0047218	FBXL2
GGE	ENSG00000031003	5	137273649	137387650	154	10	24816	2.5947	0.0047336	FAM13B
GGE	ENSG00000105717	19	19672522	19729725	60	9	24635	2.593	0.0047567	PBX4
GGE	ENSG00000165983	10	16478942	16555736	204	19	24712	2.5902	0.0047964	PTER
GGE	ENSG00000173166	2	204259068	204400133	125	12	24817	2.5893	0.0048083	RAPH1
GGE	ENSG00000183513	2	99215773	99224978	14	1	24914	2.589	0.0048129	COA5
GGE	ENSG00000140990	16	2009509	2011976	11	2	24723	2.5885	0.00482	NDUFB10
GGE	ENSG00000108424	17	45726842	45762871	36	6	24618	2.5875	0.0048336	KPNB1
GGE	ENSG00000167604	19	36378555	36393205	8	2	24398	2.5864	0.0048496	NFKBID
GGE	ENSG00000133083	13	36345478	36705443	732	96	24725	2.5853	0.0048641	DCLK1
GGE	ENSG00000038358	16	67906926	67918406	8	2	23931	2.5852	0.0048667	EDC4
GGE	ENSG00000103942	15	83509838	83654661	265	31	24361	2.5847	0.0048734	HOMER2
GGE	ENSG00000186532	17	1682779	1733928	144	13	24734	2.5839	0.0048852	SMYD4
GGE	ENSG00000137106	9	37422663	37436987	17	5	24716	2.5835	0.0048896	GRHPR
GGE	ENSG00000196653	3	44754135	44765323	6	2	24723	2.5825	0.0049047	ZNF502
GGE	ENSG00000135097	12	120779133	120806983	48	6	24797	2.5823	0.0049071	MSI1
GGE	ENSG00000165689	9	139296377	139305061	31	6	24688	2.5775	0.0049754	SDCCAG3
GGE	ENSG00000117298	1	21543740	21671997	261	37	24575	2.5749	0.0050128	ECE1
GGE	ENSG00000068912	2	54014181	54045956	61	10	24840	2.5749	0.0050129	ERLEC1
GGE	ENSG00000135486	12	54673977	54680872	4	2	24782	2.5739	0.0050282	HNRNPA1
GGE	ENSG00000154710	7	66147151	66276451	326	18	24875	2.5728	0.005044	RABGEF1
GGE	ENSG00000159753	16	67678822	67691472	12	3	24525	2.5724	0.0050499	RLTPR
GGE	ENSG00000152939	5	68710939	68740157	32	3	24890	2.5693	0.0050946	MARVELD2
GGE	ENSG00000068831	11	64494383	64512928	11	2	24794	2.5683	0.0051103	RASGRP2
GGE	ENSG00000090615	12	133345495	133405444	43	7	24718	2.5682	0.005112	GOLGA3
GGE	ENSG00000171208	16	47111614	47177908	26	3	24740	2.566	0.0051446	NETO2
GGE	ENSG00000164733	8	11700033	11726957	76	10	24510	2.5654	0.0051524	CTSB
GGE	ENSG00000243335	7	66093868	66276446	465	22	24752	2.5653	0.005155	KCTD7
GGE	ENSG00000170011	3	39850405	40301812	892	83	24846	2.5608	0.0052213	MYRIP
GGE	ENSG00000113327	5	161494546	161582542	98	17	24706	2.5593	0.0052449	GABRG2
GGE	ENSG00000025772	20	43570771	43589127	14	3	24786	2.5591	0.0052472	TOMM34
GGE	ENSG00000186642	11	72287185	72385635	184	21	24738	2.5586	0.0052543	PDE2A
GGE	ENSG00000139718	12	122242086	122270562	24	3	24579	2.5573	0.0052749	SETD1B
GGE	ENSG00000120068	17	46688739	46692478	3	2	24129	2.5567	0.0052833	HOXB8
GGE	ENSG00000167685	19	56643968	56672262	20	3	24400	2.5549	0.0053106	ZNF444
GGE	ENSG00000180116	12	40019969	40302102	477	37	24548	2.5547	0.0053139	C12orf40
GGE	ENSG00000180822	6	3231637	3303607	202	12	24649	2.5542	0.0053216	PSMG4
GGE	ENSG00000100122	22	26995242	27014052	41	5	24618	2.5538	0.0053284	CRYBB1
GGE	ENSG00000157193	1	53711217	53793742	100	13	24671	2.553	0.0053399	LRP8
GGE	ENSG00000257923	7	101458959	101927249	397	39	24714	2.5501	0.0053839	CUX1
GGE	ENSG00000003756	3	50126341	50156454	19	3	24951	2.5501	0.005385	RBM5
GGE	ENSG00000159579	16	57220049	57274387	66	8	24447	2.5489	0.0054032	RSPRY1
GGE	ENSG00000168081	8	28174503	28200872	76	5	24820	2.5487	0.0054067	PNOC
GGE	ENSG00000205832	16	4606491	4650715	22	3	24540	2.5473	0.0054276	C16orf96
GGE	ENSG00000168056	11	65306276	65326401	12	3	24545	2.5442	0.0054766	LTBP3
GGE	ENSG00000105647	19	18263928	18281350	9	2	24178	2.5425	0.0055038	PIK3R2
GGE	ENSG00000100387	22	41347351	41369313	12	4	24443	2.5417	0.0055157	RBX1
GGE	ENSG00000100393	22	41487790	41576081	83	7	24919	2.5399	0.0055442	EP300
GGE	ENSG00000163781	3	133317019	133380737	125	10	24807	2.5398	0.0055459	TOPBP1
GGE	ENSG00000113742	5	173315283	173388979	140	13	24855	2.5372	0.0055864	CPEB4
GGE	ENSG00000157542	21	38979678	39288749	726	87	24702	2.5352	0.0056194	KCNJ6
GGE	ENSG00000091039	12	76745577	76953589	257	13	24868	2.5344	0.0056324	OSBPL8
GGE	ENSG00000196476	20	251504	271390	35	7	24460	2.5341	0.0056376	C20orf96
GGE	ENSG00000107719	10	72238577	72328205	187	24	24628	2.5314	0.0056804	PALD1
GGE	ENSG00000066739	14	96747595	96830207	82	5	24763	2.5304	0.0056971	ATG2B
GGE	ENSG00000154721	21	27011584	27089874	163	21	24753	2.5287	0.0057238	JAM2
GGE	ENSG00000196652	7	99102274	99132323	29	7	24589	2.5276	0.005742	ZKSCAN5
GGE	ENSG00000163531	1	204797779	204991950	381	41	24722	2.5275	0.0057439	NFASC
GGE	ENSG00000092439	15	50844670	50979012	322	18	24853	2.526	0.0057679	TRPM7
GGE	ENSG00000158092	3	136581050	136668665	145	4	24913	2.5216	0.0058409	NCK1
GGE	ENSG00000166143	15	41107650	41120907	18	4	24566	2.5197	0.0058735	PPP1R14D
GGE	ENSG00000169180	16	28109300	28223241	65	3	24890	2.5158	0.0059388	XPO6
GGE	ENSG00000125149	16	67143861	67182442	20	5	24597	2.5152	0.0059486	C16orf70
GGE	ENSG00000145863	5	160974069	161129599	237	23	24831	2.5148	0.0059554	GABRA6
GGE	ENSG00000103995	15	49005125	49103343	97	11	24800	2.5125	0.0059936	CEP152
GGE	ENSG00000125995	20	34287194	34288906	3	1	24918	2.5125	0.0059946	ROMO1
GGE	ENSG00000142686	1	36179476	36185073	5	2	24748	2.5116	0.0060088	C1orf216
GGE	ENSG00000139725	12	122215664	122241309	22	3	24712	2.51	0.0060357	RHOF
GGE	ENSG00000197721	1	207818458	207911761	233	18	24453	2.5083	0.0060655	CR1L
GGE	ENSG00000140506	15	75105057	75118099	24	5	24679	2.5078	0.0060742	LMAN1L
GGE	ENSG00000180210	11	46740730	46761056	29	3	24587	2.5077	0.006076	F2
GGE	ENSG00000109756	4	160025330	160281321	275	24	24787	2.5062	0.0061025	RAPGEF2
GGE	ENSG00000166004	11	93394805	93463522	32	5	24870	2.5054	0.0061158	KIAA1731
GGE	ENSG00000113048	5	71515236	71616473	45	7	24850	2.5005	0.0062015	MRPS27
GGE	ENSG00000124198	20	47538427	47653230	183	12	24882	2.499	0.0062278	ARFGEF2
GGE	ENSG00000158104	12	122277433	122301502	38	5	24721	2.4985	0.0062361	HPD
GGE	ENSG00000116396	1	110753965	110825722	84	8	24683	2.4982	0.0062417	KCNC4
GGE	ENSG00000188227	19	37997841	38039664	50	10	24473	2.4982	0.006242	ZNF793
GGE	ENSG00000137038	9	7796490	7888380	182	27	24316	2.4964	0.0062732	TMEM261
GGE	ENSG00000172995	3	35680437	35835988	251	30	24702	2.4961	0.0062775	ARPP21
GGE	ENSG00000167580	12	50344524	50352664	16	4	24554	2.4955	0.0062887	AQP2
GGE	ENSG00000239389	5	140261793	140391929	118	8	24747	2.4951	0.0062954	PCDHA13
GGE	ENSG00000138772	4	79472673	79531597	101	14	24617	2.4947	0.0063026	ANXA3
GGE	ENSG00000163875	1	37958176	37980375	60	10	24831	2.4945	0.0063064	MEAF6
GGE	ENSG00000204970	5	140165876	140391929	123	8	24732	2.4896	0.0063943	PCDHA1
GGE	ENSG00000052344	16	31142756	31147083	2	1	24869	2.4881	0.0064215	PRSS8
GGE	ENSG00000170367	20	23856572	23860387	13	3	24666	2.4868	0.0064443	CST5
GGE	ENSG00000167578	19	41284121	41302847	49	10	24303	2.4868	0.0064453	RAB4B
GGE	ENSG00000133704	12	30781922	30848920	171	11	24829	2.4848	0.0064814	IPO8
GGE	ENSG00000049239	1	9294834	9331396	44	6	24682	2.4845	0.0064859	H6PD
GGE	ENSG00000125779	20	3869486	3907605	58	6	24860	2.4842	0.0064919	PANK2
GGE	ENSG00000163833	3	121311966	121349139	82	15	24803	2.4834	0.0065058	FBXO40
GGE	ENSG00000204969	5	140174444	140391929	122	8	24730	2.4832	0.0065103	PCDHA2
GGE	ENSG00000255408	5	140180783	140391929	122	8	24730	2.4832	0.0065103	PCDHA3
GGE	ENSG00000102893	16	47495034	47735434	100	5	24660	2.4832	0.0065104	PHKB
GGE	ENSG00000186792	3	50330262	50336899	2	1	23790	2.4831	0.006513	HYAL3
GGE	ENSG00000185046	12	99120235	100378432	2057	159	24719	2.4829	0.0065164	ANKS1B
GGE	ENSG00000251664	5	140255058	140391929	119	8	24747	2.4825	0.0065236	PCDHA12
GGE	ENSG00000179934	3	39371197	39375171	2	1	24669	2.4821	0.00653	CCR8
GGE	ENSG00000078795	5	137223657	137278436	58	8	24806	2.482	0.0065331	PKD2L2
GGE	ENSG00000170681	9	103340361	103350188	34	8	24809	2.4806	0.0065572	MURC
GGE	ENSG00000172053	3	49133365	49142553	5	2	24967	2.4801	0.0065679	QARS
GGE	ENSG00000204967	5	140186659	140391929	121	8	24743	2.4801	0.006568	PCDHA4
GGE	ENSG00000204965	5	140201222	140391929	121	8	24743	2.4801	0.006568	PCDHA5
GGE	ENSG00000081842	5	140207563	140391929	121	8	24743	2.4801	0.006568	PCDHA6
GGE	ENSG00000204963	5	140213969	140391929	121	8	24743	2.4801	0.006568	PCDHA7
GGE	ENSG00000204962	5	140220907	140391929	121	8	24743	2.4801	0.006568	PCDHA8
GGE	ENSG00000204961	5	140227048	140391929	121	8	24743	2.4801	0.006568	PCDHA9
GGE	ENSG00000250120	5	140235595	140391929	121	8	24743	2.4801	0.006568	PCDHA10
GGE	ENSG00000249158	5	140248689	140391929	121	8	24743	2.4801	0.006568	PCDHA11
GGE	ENSG00000248643	11	66384097	66413940	17	5	24789	2.4793	0.0065827	RBM14-RBM4
GGE	ENSG00000102468	13	47405685	47471169	124	22	24814	2.4786	0.0065942	HTR2A
GGE	ENSG00000168067	11	64556290	64570713	3	1	24547	2.4783	0.0066009	MAP4K2
GGE	ENSG00000185875	10	25305587	25315593	15	1	24881	2.4774	0.0066171	THNSL1
GGE	ENSG00000189298	6	28317691	28336947	50	10	24880	2.4769	0.0066261	ZKSCAN3
GGE	ENSG00000197013	19	21679484	21739072	104	6	24615	2.4769	0.0066272	ZNF429
GGE	ENSG00000159588	1	46085716	46089729	8	2	24948	2.4764	0.0066364	CCDC17
GGE	ENSG00000168917	3	136537489	136574734	75	3	24877	2.4749	0.006664	SLC35G2
GGE	ENSG00000197826	4	81256874	81884910	915	63	24719	2.4735	0.0066897	C4orf22
GGE	ENSG00000142178	21	44834395	44847008	1	1	23153	2.4727	0.006705	SIK1
GGE	ENSG00000149547	11	125439112	125454575	29	5	24667	2.4721	0.0067153	EI24
GGE	ENSG00000173960	2	24150155	24227779	213	16	24735	2.4719	0.0067194	UBXN2A
GGE	ENSG00000244005	20	34255977	34287281	55	7	24873	2.4717	0.006723	NFS1
GGE	ENSG00000158691	6	28346732	28367511	48	6	24959	2.4714	0.0067286	ZSCAN12
GGE	ENSG00000189362	2	191369068	191399448	53	7	24924	2.4693	0.0067685	TMEM194B
GGE	ENSG00000120251	4	158125334	158287227	126	10	24613	2.4689	0.0067769	GRIA2
GGE	ENSG00000197157	7	127292234	127732661	469	33	24800	2.4683	0.0067882	SND1
GGE	ENSG00000197885	3	23933151	23988082	134	10	24884	2.4681	0.0067914	NKIRAS1
GGE	ENSG00000144619	3	2140497	3099645	2073	211	24625	2.4677	0.0067997	CNTN4
GGE	ENSG00000054118	1	36690017	36770958	47	3	24780	2.4663	0.0068261	THRAP3
GGE	ENSG00000011021	1	11866207	11903201	163	13	24775	2.4659	0.006834	CLCN6
GGE	ENSG00000163646	3	150643950	150690786	87	14	24594	2.4657	0.0068371	CLRN1
GGE	ENSG00000008988	8	56979854	56987069	19	4	24888	2.4657	0.0068374	RPS20
GGE	ENSG00000106733	9	77675489	77703133	93	15	24671	2.4655	0.0068415	NMRK1
GGE	ENSG00000132182	3	13357737	13461809	204	10	24794	2.4652	0.0068467	NUP210
GGE	ENSG00000177156	11	747329	765024	8	3	24475	2.4643	0.0068633	TALDO1
GGE	ENSG00000123444	11	47593749	47600567	1	1	24968	2.4641	0.006867	KBTBD4
GGE	ENSG00000175449	5	94982458	95020477	58	9	24671	2.4641	0.0068684	RFESD
GGE	ENSG00000182389	2	152689290	152955593	484	41	24758	2.4634	0.0068809	CACNB4
GGE	ENSG00000126001	20	34042985	34099804	63	3	24743	2.4633	0.0068829	CEP250
GGE	ENSG00000182670	21	38445526	38575413	326	13	24722	2.4632	0.0068849	TTC3
GGE	ENSG00000156831	8	126103921	126379362	358	36	24752	2.4593	0.0069608	NSMCE2
GGE	ENSG00000196123	16	67209505	67217943	6	2	24743	2.4582	0.0069825	KIAA0895L
GGE	ENSG00000059377	7	139476850	139720125	248	36	24748	2.4552	0.0070393	TBXAS1
GGE	ENSG00000091947	17	42088556	42101314	20	6	24621	2.454	0.0070646	TMEM101
GGE	ENSG00000092445	15	41849873	41871536	27	6	24612	2.453	0.0070839	TYRO3
GGE	ENSG00000105968	7	44866390	44887682	39	5	24847	2.4526	0.0070922	H2AFV
GGE	ENSG00000176571	8	87878670	88627447	1506	91	24749	2.4519	0.0071043	CNBD1
GGE	ENSG00000113328	5	162864575	162873157	5	2	24830	2.4516	0.0071114	CCNG1
GGE	ENSG00000132622	20	3713314	3733758	17	4	24513	2.4512	0.0071187	HSPA12B
GGE	ENSG00000167880	17	74000583	74023533	14	4	24607	2.4508	0.0071271	EVPL
GGE	ENSG00000163933	3	53122499	53164478	73	6	24916	2.4502	0.0071383	RFT1
GGE	ENSG00000184924	2	25012603	25016251	10	3	24848	2.4502	0.0071385	PTRHD1
GGE	ENSG00000143375	1	151482986	151511168	21	4	24547	2.4499	0.0071438	CGN
GGE	ENSG00000071051	2	106361354	106510730	431	37	24541	2.4488	0.0071674	NCK2
GGE	ENSG00000166734	15	44580927	44707956	122	6	24744	2.4485	0.0071725	CASC4
GGE	ENSG00000099783	19	8509651	8553998	72	9	24505	2.4481	0.0071815	HNRNPM
GGE	ENSG00000141098	16	67708434	67753324	33	5	24346	2.4473	0.0071959	GFOD2
GGE	ENSG00000118705	20	35806813	35870022	162	9	24685	2.4472	0.0071976	RPN2
GGE	ENSG00000198520	1	45140364	45191263	16	4	24683	2.447	0.0072027	C1orf228
GGE	ENSG00000173914	11	66432469	66445392	7	3	24712	2.4465	0.0072134	RBM4B
GGE	ENSG00000167645	19	38795753	38807913	24	5	24596	2.4462	0.0072176	YIF1B
GGE	ENSG00000149179	11	46958240	47185936	124	13	24690	2.444	0.007262	C11orf49
GGE	ENSG00000176788	5	17065707	17276943	231	32	24648	2.4414	0.007315	BASP1
GGE	ENSG00000119777	2	27255778	27264563	5	2	24925	2.4406	0.0073313	TMEM214
GGE	ENSG00000140577	15	91073157	91188577	220	17	24791	2.44	0.0073436	CRTC3
GGE	ENSG00000166736	11	113845603	113861035	31	6	24668	2.44	0.0073445	HTR3A
GGE	ENSG00000174791	11	66097713	66104311	11	3	24788	2.4387	0.0073692	RIN1
GGE	ENSG00000121964	2	144695635	145090135	278	22	24653	2.4362	0.0074219	GTDC1
GGE	ENSG00000236980	3	49215065	49229291	13	3	24962	2.4334	0.0074784	C3orf84
GGE	ENSG00000155229	10	99218081	99258551	52	8	24717	2.433	0.007487	MMS19
GGE	ENSG00000135018	9	86274878	86323118	102	9	24959	2.4314	0.0075205	UBQLN1
GGE	ENSG00000169752	15	76228310	76352136	198	8	24508	2.428	0.0075906	NRG4
GGE	ENSG00000185345	6	161768452	163148803	3219	245	24735	2.4275	0.0076009	PARK2
GGE	ENSG00000173421	3	49235861	49295537	55	6	24791	2.4269	0.0076136	CCDC36
GGE	ENSG00000102977	16	67691415	67694713	3	2	24317	2.4268	0.0076154	ACD
GGE	ENSG00000124172	20	57600522	57607437	6	2	24796	2.4267	0.0076178	ATP5E
GGE	ENSG00000066135	1	44115829	44171186	52	8	24807	2.4261	0.007631	KDM4A
GGE	ENSG00000151617	4	148402069	148466106	87	7	24772	2.4259	0.0076342	EDNRA
GGE	ENSG00000152223	18	43427574	43547240	189	14	24893	2.4238	0.0076802	EPG5
GGE	ENSG00000145022	3	49449639	49453908	5	2	24955	2.4229	0.0076983	TCTA
GGE	ENSG00000253159	5	140810185	140892546	173	24	24703	2.4208	0.0077424	PCDHGA12
GGE	ENSG00000115935	2	175424300	175547644	119	19	24696	2.4208	0.0077428	WIPF1
GGE	ENSG00000157734	15	64443914	64449680	5	2	24679	2.4201	0.0077584	SNX22
GGE	ENSG00000196772	1	247978102	247979031	4	2	24742	2.4193	0.0077752	OR14A16
GGE	ENSG00000010610	12	6896024	6929974	35	6	24660	2.4191	0.0077797	CD4
GGE	ENSG00000110660	11	107661717	107799019	399	38	24724	2.4188	0.0077865	SLC35F2
GGE	ENSG00000060688	1	31732417	31769662	76	6	24827	2.4187	0.007788	SNRNP40
GGE	ENSG00000170485	2	101436614	101613291	374	60	24729	2.4186	0.0077893	NPAS2
GGE	ENSG00000099904	22	20116979	20135530	24	6	24596	2.4166	0.0078328	ZDHHC8
GGE	ENSG00000188559	20	20370196	20693131	191	10	24781	2.416	0.0078459	RALGAPA2
GGE	ENSG00000140848	16	57126449	57181878	78	15	24418	2.4159	0.007849	CPNE2
GGE	ENSG00000118160	19	47931274	47975425	53	6	24609	2.4155	0.007857	SLC8A2
GGE	ENSG00000105699	19	35739233	35758867	44	9	24691	2.4153	0.0078601	LSR
GGE	ENSG00000075275	22	46756731	46933067	253	35	24470	2.4131	0.0079095	CELSR1
GGE	ENSG00000153443	16	4658884	4665028	4	1	24778	2.4122	0.0079289	UBALD1
GGE	ENSG00000157093	3	42438570	42452092	18	5	24705	2.4119	0.0079344	LYZL4
GGE	ENSG00000109805	4	17812525	17846485	51	6	24888	2.4118	0.0079365	NCAPG
GGE	ENSG00000216490	19	18283972	18288927	10	2	24594	2.4103	0.0079701	IFI30
GGE	ENSG00000111639	12	6601150	6603007	2	1	24863	2.409	0.0079977	MRPL51
GGE	ENSG00000171970	19	2900896	2918474	22	3	24398	2.4066	0.0080511	ZNF57
GGE	ENSG00000008441	19	13106422	13209610	48	7	24461	2.406	0.0080631	NFIX
GGE	ENSG00000108950	17	66531254	66597530	68	11	24673	2.4051	0.0080834	FAM20A
GGE	ENSG00000106803	9	101984346	101992897	14	1	24635	2.4047	0.0080933	SEC61B
GGE	ENSG00000167196	15	76196200	76227609	36	5	24602	2.4042	0.0081039	FBXO22
GGE	ENSG00000184344	12	7842378	7848372	12	5	24375	2.4037	0.0081154	GDF3
GGE	ENSG00000239306	11	66384053	66394818	6	3	24925	2.4021	0.0081516	RBM14
GGE	ENSG00000084090	2	96850597	96874563	17	3	24608	2.4001	0.0081964	STARD7
GGE	ENSG00000237693	5	150226085	150280298	130	6	24988	2.4	0.0081983	IRGM
GGE	ENSG00000114738	3	50648951	50686720	47	7	24815	2.3997	0.0082034	MAPKAPK3
GGE	ENSG00000130517	19	18451397	18480760	30	5	24426	2.3959	0.0082899	PGPEP1
GGE	ENSG00000135503	12	52345451	52390862	33	5	24472	2.3957	0.0082949	ACVR1B
GGE	ENSG00000064726	15	83685174	83736106	99	14	24574	2.3948	0.0083154	BTBD1
GGE	ENSG00000108384	17	56769934	56811703	57	9	24795	2.3946	0.0083201	RAD51C
GGE	ENSG00000161265	19	36233365	36236346	3	1	24656	2.3944	0.0083231	U2AF1L4
GGE	ENSG00000175592	11	65659520	65668044	12	3	24762	2.3935	0.0083439	FOSL1
GGE	ENSG00000119878	2	46843555	46852881	15	4	24794	2.3926	0.0083636	CRIPT
GGE	ENSG00000150873	2	11273179	11286916	1	1	24782	2.3924	0.008369	C2orf50
GGE	ENSG00000111696	12	104164231	104234975	261	18	24947	2.391	0.0084007	NT5DC3
GGE	ENSG00000101464	20	33148346	33264910	103	7	24869	2.3889	0.0084498	PIGU
GGE	ENSG00000123810	19	41860326	41870078	16	3	24489	2.3876	0.0084785	B9D2
GGE	ENSG00000110975	12	33527173	33592754	173	15	24791	2.3871	0.0084901	SYT10
GGE	ENSG00000173915	10	105148798	105156223	5	2	24963	2.3868	0.0084987	USMG5
GGE	ENSG00000129636	16	47188298	47498060	145	7	24637	2.3866	0.0085018	ITFG1
GGE	ENSG00000160307	21	48018875	48025121	25	6	24751	2.3858	0.0085219	S100B
GGE	ENSG00000124783	6	7268539	7347679	232	20	24744	2.3857	0.0085228	SSR1
GGE	ENSG00000197125	11	124310022	124311054	1	1	24832	2.3855	0.008528	OR8B8
GGE	ENSG00000146425	6	159057506	159065771	9	2	24718	2.3855	0.0085282	DYNLT1
GGE	ENSG00000149557	11	125315646	125366213	93	14	24752	2.3854	0.0085313	FEZ1
GGE	ENSG00000087338	2	70056774	70108528	61	6	24957	2.3846	0.0085498	GMCL1
GGE	ENSG00000100395	22	41601209	41627275	73	4	24907	2.3828	0.0085918	L3MBTL2
GGE	ENSG00000132463	4	71681499	71705662	53	6	24537	2.3827	0.0085939	GRSF1
GGE	ENSG00000177614	1	230457392	230561475	223	25	24691	2.3824	0.0085994	PGBD5
GGE	ENSG00000100218	22	23401593	23487208	113	8	24873	2.3812	0.0086278	RTDR1
GGE	ENSG00000130703	20	60813580	60871268	68	4	24587	2.3797	0.0086627	OSBPL2
GGE	ENSG00000152092	1	176826438	177134109	503	58	24711	2.3795	0.0086682	ASTN1
GGE	ENSG00000174842	1	92711959	92764544	33	4	24879	2.3785	0.0086925	GLMN
GGE	ENSG00000137460	4	153857504	153900848	40	10	24501	2.3782	0.0086987	FHDC1
GGE	ENSG00000196172	19	23921997	23941693	25	7	24571	2.3767	0.0087342	ZNF681
GGE	ENSG00000140830	16	72078188	72128330	107	13	24536	2.3767	0.0087346	TXNL4B
GGE	ENSG00000137770	15	44719432	44821236	62	7	24533	2.3764	0.0087405	CTDSPL2
GGE	ENSG00000162365	1	47603107	47615413	34	5	24726	2.374	0.0087971	CYP4A22
GGE	ENSG00000088280	1	23755056	23811061	85	10	24595	2.3737	0.0088049	ASAP3
GGE	ENSG00000176407	2	85198216	85286595	27	3	24526	2.3736	0.0088074	KCMF1
GGE	ENSG00000184357	6	27834570	27835359	2	1	23568	2.3736	0.0088083	HIST1H1B
GGE	ENSG00000151575	15	56536207	56738195	433	26	24754	2.3726	0.0088317	TEX9
GGE	ENSG00000253873	5	140800762	140891835	192	25	24704	2.3719	0.008849	PCDHGA11
GGE	ENSG00000169964	3	44903361	44907162	2	1	24949	2.3702	0.0088882	TMEM42
GGE	ENSG00000137343	6	30594619	30614600	20	6	24587	2.37	0.0088938	ATAT1
GGE	ENSG00000163743	4	76404247	76439974	63	7	24900	2.3689	0.0089207	RCHY1
GGE	ENSG00000120708	5	135364584	135399507	61	6	24785	2.3686	0.0089276	TGFBI
GGE	ENSG00000139083	12	11802788	12048336	279	53	24627	2.368	0.0089421	ETV6
GGE	ENSG00000121101	17	56634039	56769416	211	18	24807	2.3675	0.0089539	TEX14
GGE	ENSG00000115806	2	171784974	171823639	52	5	24855	2.3675	0.0089552	GORASP2
GGE	ENSG00000140505	15	75041185	75048543	2	1	24803	2.367	0.0089676	CYP1A2
GGE	ENSG00000182263	2	164449906	164592522	156	23	24622	2.3665	0.0089775	FIGN
GGE	ENSG00000173465	11	65337901	65341413	2	1	24586	2.3645	0.0090268	SSSCA1
GGE	ENSG00000137944	1	89401456	89458636	75	5	24903	2.3623	0.0090801	CCBL2
GGE	ENSG00000182183	1	53099016	53135355	52	11	24716	2.3621	0.0090848	FAM159A
GGE	ENSG00000178209	8	144989321	145050902	8	2	24595	2.3613	0.0091051	PLEC
GGE	ENSG00000101230	20	13202418	13281298	133	15	24628	2.3607	0.0091202	ISM1
GGE	ENSG00000173638	21	46913486	46964325	45	3	24582	2.3606	0.0091218	SLC19A1
GGE	ENSG00000110104	11	60609544	60618554	13	5	24452	2.3603	0.0091296	CCDC86
GGE	ENSG00000135148	12	112563305	112591407	19	5	24694	2.3593	0.0091549	TRAFD1
GGE	ENSG00000186407	17	72606026	72619897	33	7	24652	2.3576	0.0091955	CD300E
GGE	ENSG00000140057	14	96858448	96955764	69	9	24629	2.3575	0.0091995	AK7
GGE	ENSG00000150712	5	32227100	32313115	176	14	24269	2.3563	0.009229	MTMR12
GGE	ENSG00000188677	22	44395091	44568829	192	40	24619	2.356	0.0092366	PARVB
GGE	ENSG00000182256	15	27216429	27778373	691	85	24693	2.3544	0.0092762	GABRG3
GGE	ENSG00000169814	3	15642848	15687329	58	8	24761	2.3522	0.0093321	BTD
GGE	ENSG00000125810	20	23059986	23066977	9	3	24743	2.3517	0.0093449	CD93
GGE	ENSG00000110108	11	60681346	60690915	6	3	24673	2.3507	0.0093694	TMEM109
GGE	ENSG00000132334	10	129705325	129884119	350	71	24570	2.3483	0.0094291	PTPRE
GGE	ENSG00000124812	6	49801970	49844809	87	8	24816	2.348	0.0094362	CRISP1
GGE	ENSG00000126259	19	36346763	36358011	5	2	24551	2.3479	0.009441	KIRREL2
GGE	ENSG00000204435	6	31633013	31638120	13	6	24555	2.3472	0.0094568	CSNK2B
GGE	ENSG00000125249	13	98086476	98121382	32	6	24285	2.3471	0.0094606	RAP2A
GGE	ENSG00000107874	10	104183002	104192418	12	3	24824	2.3463	0.0094797	CUEDC2
GGE	ENSG00000135643	12	70760056	70828072	201	29	24773	2.3457	0.009496	KCNMB4
GGE	ENSG00000141431	18	31158579	31331156	284	25	24809	2.3454	0.009503	ASXL3
GGE	ENSG00000130518	19	18367908	18385319	57	6	24520	2.3441	0.0095366	KIAA1683
GGE	ENSG00000205643	22	46639908	46646576	22	3	24251	2.3426	0.0095739	CDPF1
GGE	ENSG00000108100	10	35535953	35860852	298	17	24801	2.3424	0.0095792	CCNY
GGE	ENSG00000196155	16	67311413	67323402	10	3	24706	2.34	0.0096428	PLEKHG4
GGE	ENSG00000165072	9	72658497	72841886	93	9	24960	2.3394	0.009657	MAMDC2
GGE	ENSG00000077092	3	25215823	25639423	1157	96	24629	2.3393	0.0096602	RARB
GGE	ENSG00000075218	22	46692638	46726707	73	7	24330	2.339	0.0096673	GTSE1
GGE	ENSG00000254122	5	140797427	140892546	197	26	24708	2.3382	0.009689	PCDHGB7
GGE	ENSG00000134539	12	10378657	10469850	195	19	24736	2.3378	0.0096992	KLRD1
GGE	ENSG00000186716	22	23521891	23660224	238	27	24744	2.3376	0.009704	BCR
GGE	ENSG00000168769	4	106067032	106200973	226	31	24272	2.3369	0.0097226	TET2
GGE	ENSG00000161835	12	52400724	52409673	4	2	24372	2.3363	0.0097368	GRASP
GGE	ENSG00000049883	5	71616194	71656052	14	5	24806	2.336	0.0097463	PTCD2
GGE	ENSG00000203910	1	92683497	92711370	16	3	24760	2.3356	0.0097572	C1orf146
GGE	ENSG00000205745	7	36118694	36125346	4	1	24817	2.3352	0.009766	PP13004
GGE	ENSG00000166501	16	23847322	24231932	719	93	24539	2.3333	0.0098161	PRKCB
GGE	ENSG00000119004	2	204103663	204163009	81	8	24808	2.331	0.0098768	CYP20A1
GGE	ENSG00000188315	3	49306035	49315342	8	3	24719	2.3298	0.0099076	C3orf62
GGE	ENSG00000179256	12	14957584	14967116	14	4	24825	2.3297	0.0099101	SMCO3
GGE	ENSG00000147896	9	27524312	27526496	13	6	24558	2.3297	0.0099102	IFNK
GGE	ENSG00000136240	7	6485584	6523873	56	9	24113	2.3294	0.0099186	KDELR2
GGE	ENSG00000148835	10	105127724	105148822	13	2	24940	2.3284	0.0099455	TAF5
GGE	ENSG00000130772	1	28655513	28662476	1	1	24875	2.3283	0.009949	MED18
GGE	ENSG00000259024	17	15339338	15466875	221	23	24774	2.3269	0.0099865	TVP23C-CDRT4
GGE	ENSG00000118689	6	108881038	109005977	130	14	24686	2.326	0.01001	FOXO3
GGE	ENSG00000167261	16	68021297	68034489	12	4	24374	2.3255	0.010023	DPEP2
GGE	ENSG00000110719	11	67806483	67818362	9	3	24451	2.3251	0.010033	TCIRG1
GGE	ENSG00000123200	13	46528600	46626894	117	5	24882	2.3239	0.010065	ZC3H13
GGE	ENSG00000169213	1	52373628	52456436	121	16	24584	2.3231	0.010086	RAB3B
GGE	ENSG00000204472	6	31582961	31584798	5	2	24767	2.3231	0.010087	AIF1
GGE	ENSG00000130559	9	138700333	138799074	86	8	24846	2.322	0.010115	CAMSAP1
GGE	ENSG00000010318	3	52444673	52457657	6	3	24663	2.3215	0.010129	PHF7
GGE	ENSG00000111203	12	2921788	2968957	67	4	24575	2.321	0.010144	ITFG2
GGE	ENSG00000134762	18	28569974	28622781	103	10	24877	2.3209	0.010147	DSC3
GGE	ENSG00000134779	18	34359987	34409158	71	5	24852	2.3197	0.010179	TPGS2
GGE	ENSG00000166747	16	71762913	71843104	112	14	24755	2.3197	0.01018	AP1G1
GGE	ENSG00000164597	7	106842000	107204959	535	22	24853	2.3196	0.010181	COG5
GGE	ENSG00000126267	19	36139125	36149763	11	2	24437	2.3189	0.010199	COX6B1
GGE	ENSG00000196967	19	37597636	37663643	96	8	24684	2.318	0.010224	ZNF585A
GGE	ENSG00000137727	11	110447766	110583912	239	20	24851	2.3167	0.010261	ARHGAP20
GGE	ENSG00000059691	4	152591656	152682175	158	7	24928	2.3151	0.010305	PET112
GGE	ENSG00000103591	15	67493371	67547533	77	5	24862	2.3142	0.010327	AAGAB
GGE	ENSG00000141084	16	67757005	67840555	61	7	24463	2.3142	0.010328	RANBP10
GGE	ENSG00000205155	19	36236015	36237911	2	1	24611	2.3142	0.010328	PSENEN
GGE	ENSG00000124191	20	42543504	42698256	198	32	24666	2.3142	0.010328	TOX2
GGE	ENSG00000168795	9	37438111	37465396	25	6	24707	2.3134	0.01035	ZBTB5
GGE	ENSG00000256892	10	37890366	37891859	6	2	24316	2.3104	0.010432	MTRNR2L7
GGE	ENSG00000137166	6	41514164	41570122	38	4	24693	2.3092	0.010466	FOXP4
GGE	ENSG00000091640	17	4862521	4871167	11	4	24840	2.309	0.010472	SPAG7
GGE	ENSG00000119737	2	54080050	54087126	14	5	24734	2.3085	0.010486	GPR75
GGE	ENSG00000175106	17	15341205	15466909	218	23	24777	2.3083	0.010491	TVP23C
GGE	ENSG00000132780	1	46049518	46084566	33	3	24925	2.3076	0.010511	NASP
GGE	ENSG00000135298	6	69345259	70099403	1567	103	24682	2.3075	0.010514	BAI3
GGE	ENSG00000139193	12	6554033	6560884	2	1	24703	2.3071	0.010524	CD27
GGE	ENSG00000103047	16	68877507	69119083	361	32	24787	2.3069	0.010531	TANGO6
GGE	ENSG00000182511	15	91426925	91439006	15	2	24400	2.3055	0.01057	FES
GGE	ENSG00000168288	2	150426148	150444330	27	4	24731	2.305	0.010583	MMADHC
GGE	ENSG00000253846	5	140792743	140892546	200	26	24712	2.3048	0.010587	PCDHGA10
GGE	ENSG00000089157	12	120634489	120639038	3	1	24572	2.3043	0.010602	RPLP0
GGE	ENSG00000168824	4	4349867	4420785	114	18	24642	2.3037	0.01062	NSG1
GGE	ENSG00000137055	9	26904081	26947461	106	12	24859	2.3035	0.010625	PLAA
GGE	ENSG00000049192	5	64444563	64777747	565	54	24774	2.3029	0.010641	ADAMTS6
GGE	ENSG00000101460	20	33134658	33148149	16	3	24876	2.3028	0.010645	MAP1LC3A
GGE	ENSG00000148057	9	86237964	86259045	42	7	24875	2.3017	0.010676	IDNK
GGE	ENSG00000103544	16	19566562	19718115	336	36	24765	2.3017	0.010676	C16orf62
GGE	ENSG00000146592	7	28338940	28865511	1021	141	24571	2.3015	0.010682	CREB5
GGE	ENSG00000102904	16	67840668	67866051	20	5	24420	2.2995	0.010739	TSNAXIP1
GGE	ENSG00000128487	17	19912657	20222339	517	23	24541	2.2991	0.010749	SPECC1
GGE	ENSG00000154478	10	125425871	125454123	53	14	24649	2.299	0.010752	GPR26
GGE	ENSG00000211450	11	57508825	57510986	2	1	24983	2.2989	0.010755	C11orf31
GGE	ENSG00000135776	1	229652329	229694442	32	2	24805	2.2972	0.010802	ABCB10
GGE	ENSG00000174485	15	65950384	66084631	190	9	24930	2.2967	0.010819	DENND4A
GGE	ENSG00000141096	16	68009566	68014732	5	2	24579	2.2961	0.010835	DPEP3
GGE	ENSG00000125388	4	2965335	3042474	187	16	24622	2.2942	0.010891	GRK4
GGE	ENSG00000253305	5	140787770	140892546	207	26	24711	2.2936	0.010906	PCDHGB6
GGE	ENSG00000119986	10	99437181	99447080	21	4	24714	2.2933	0.010915	AVPI1
GGE	ENSG00000102898	16	67880635	67906470	24	5	24225	2.2926	0.010937	NUTF2
GGE	ENSG00000147533	8	41347915	41368499	49	9	24417	2.292	0.010952	GOLGA7
GGE	ENSG00000133789	11	9685624	9774538	232	12	24824	2.2919	0.010954	SWAP70
GGE	ENSG00000091127	7	105080108	105162714	128	11	24761	2.2904	0.010998	PUS7
GGE	ENSG00000083812	19	58978423	58984945	4	2	24091	2.2901	0.011008	ZNF324
GGE	ENSG00000160305	21	47878812	47989926	338	32	24771	2.2899	0.011015	DIP2A
GGE	ENSG00000135924	2	220143989	220151622	9	2	24630	2.2892	0.011035	DNAJB2
GGE	ENSG00000165912	11	47199076	47207994	6	2	24923	2.2889	0.011044	PACSIN3
GGE	ENSG00000160691	1	154934774	154946871	9	2	24416	2.2888	0.011047	SHC1
GGE	ENSG00000147443	8	21766384	21771371	2	1	24661	2.2886	0.011051	DOK2
GGE	ENSG00000116157	1	53068044	53074723	17	5	24746	2.2885	0.011053	GPX7
GGE	ENSG00000154229	17	64298754	64806861	1220	123	24736	2.2874	0.011087	PRKCA
GGE	ENSG00000143867	2	19551246	19558414	1	1	24274	2.2873	0.01109	OSR1
GGE	ENSG00000168813	19	32836500	32878573	63	11	24526	2.2872	0.011091	ZNF507
GGE	ENSG00000184182	2	238875469	238951236	175	9	24906	2.2864	0.011115	UBE2F
GGE	ENSG00000100106	22	38093011	38172563	109	12	24485	2.2862	0.011122	TRIOBP
GGE	ENSG00000107829	10	103370423	103455052	82	9	24853	2.2851	0.011153	FBXW4
GGE	ENSG00000221968	11	61640991	61659523	21	2	24697	2.285	0.011157	FADS3
GGE	ENSG00000108468	17	46147414	46178883	81	11	24788	2.2849	0.011158	CBX1
GGE	ENSG00000163001	2	55746740	55773015	59	11	24764	2.2845	0.01117	CCDC104
GGE	ENSG00000105875	7	134868590	134896316	66	4	24930	2.2837	0.011193	WDR91
GGE	ENSG00000105290	19	36358801	36370693	15	1	24739	2.2834	0.011203	APLP1
GGE	ENSG00000105835	7	105888731	105926772	52	7	24720	2.283	0.011214	NAMPT
GGE	ENSG00000100403	22	41697526	41756151	49	5	24790	2.2828	0.011222	ZC3H7B
GGE	ENSG00000249471	19	58962971	58969200	7	2	24429	2.2827	0.011223	ZNF324B
GGE	ENSG00000135249	7	105172532	105208124	55	7	24658	2.2827	0.011225	RINT1
GGE	ENSG00000069956	15	52244303	52358462	63	6	24665	2.2813	0.011264	MAPK6
GGE	ENSG00000175893	9	14611069	14693469	240	30	24657	2.281	0.011273	ZDHHC21
GGE	ENSG00000053900	4	25378835	25420120	113	8	24726	2.2779	0.011367	ANAPC4
GGE	ENSG00000125851	20	17206752	17465223	778	95	24583	2.2776	0.011375	PCSK2
GGE	ENSG00000145020	3	49454211	49460186	7	2	24956	2.2774	0.011381	AMT
GGE	ENSG00000185236	19	8454865	8469318	29	4	24365	2.2773	0.011384	RAB11B
GGE	ENSG00000158050	2	96808905	96811179	1	1	24919	2.2764	0.01141	DUSP2
GGE	ENSG00000196611	11	102660651	102668891	15	5	24729	2.2764	0.011412	MMP1
GGE	ENSG00000072201	4	54325468	54567572	596	63	24843	2.2755	0.011438	LNX1
GGE	ENSG00000075234	22	46663858	46689905	63	5	24431	2.2752	0.011446	TTC38
GGE	ENSG00000168676	16	67323331	67360666	27	4	24448	2.2747	0.011463	KCTD19
GGE	ENSG00000101695	18	29598335	29653176	32	5	24407	2.2746	0.011465	RNF125
GGE	ENSG00000167553	12	49582519	49667114	70	11	24512	2.2745	0.011467	TUBA1C
GGE	ENSG00000053702	12	2934514	2944710	18	3	24705	2.2736	0.011495	NRIP2
GGE	ENSG00000176256	1	34326076	34330392	5	2	24522	2.2733	0.011505	HMGB4
GGE	ENSG00000168454	18	9885763	9889272	12	3	24687	2.2725	0.011529	TXNDC2
GGE	ENSG00000170037	17	7835419	7853236	29	2	24754	2.2715	0.011558	CNTROB
GGE	ENSG00000104714	8	564746	688106	490	49	24458	2.2707	0.011582	ERICH1
GGE	ENSG00000181195	8	57349233	57359293	27	6	24610	2.2705	0.011588	PENK
GGE	ENSG00000130489	22	50961997	50964868	7	2	24471	2.2702	0.011598	SCO2
GGE	ENSG00000164924	8	101928753	101965616	49	4	24726	2.27	0.011603	YWHAZ
GGE	ENSG00000140623	16	4827670	4838522	1	1	24378	2.2698	0.01161	2012-09-01
GGE	ENSG00000156345	9	90581356	90589668	13	4	24570	2.268	0.011665	CDK20
GGE	ENSG00000186075	17	38024417	38034149	31	3	24517	2.2679	0.011666	ZPBP2
GGE	ENSG00000239900	22	40742507	40786467	29	5	24417	2.2678	0.011671	ADSL
GGE	ENSG00000212123	19	5782971	5784776	3	1	24210	2.2676	0.011677	PRR22
GGE	ENSG00000105357	19	50691443	50813802	97	11	24474	2.267	0.011696	MYH14
GGE	ENSG00000164841	8	109619079	109799844	397	37	24669	2.2669	0.011699	TMEM74
GGE	ENSG00000110367	11	118620034	118661858	15	4	24864	2.2667	0.011703	DDX6
GGE	ENSG00000131013	6	149825869	149867174	26	2	24911	2.2667	0.011704	PPIL4
GGE	ENSG00000138092	2	25016005	25045245	58	10	24883	2.2649	0.011759	CENPO
GGE	ENSG00000132464	4	71494461	71552533	5	1	24125	2.2643	0.011777	ENAM
GGE	ENSG00000162670	1	190066792	190446759	499	35	24858	2.2643	0.011779	BRINP3
GGE	ENSG00000166140	15	41099284	41106767	18	4	24735	2.264	0.011787	ZFYVE19
GGE	ENSG00000115239	2	53759810	54087170	742	67	24724	2.2639	0.011789	GPR75-ASB3
GGE	ENSG00000184014	11	9160372	9286937	201	18	24790	2.2634	0.011807	DENND5A
GGE	ENSG00000135108	12	117581146	117628336	109	4	24928	2.2632	0.011812	FBXO21
GGE	ENSG00000088836	20	3208063	3219836	19	6	24458	2.2626	0.011831	SLC4A11
GGE	ENSG00000035403	10	75757872	75879918	91	10	24807	2.2621	0.011846	VCL
GGE	ENSG00000239264	6	7881483	8026646	279	44	24754	2.2619	0.011853	TXNDC5
GGE	ENSG00000159199	17	46970127	46973233	6	2	24830	2.2617	0.011857	ATP5G1
GGE	ENSG00000115137	2	25166505	25194963	40	7	24657	2.2602	0.011903	DNAJC27
GGE	ENSG00000135525	6	136663875	136871957	102	5	24902	2.2597	0.01192	MAP7
GGE	ENSG00000139192	12	6560856	6575683	38	5	24799	2.2595	0.011925	TAPBPL
GGE	ENSG00000248385	19	54573149	54584634	8	1	24630	2.2583	0.011963	TARM1
GGE	ENSG00000103160	16	84155886	84178797	44	9	24478	2.2582	0.011966	HSDL1
GGE	ENSG00000101019	20	33890369	33999944	127	6	24796	2.2582	0.011968	UQCC1
GGE	ENSG00000141759	18	77732867	77793949	143	13	24742	2.2576	0.011984	TXNL4A
GGE	ENSG00000162849	1	245318287	245872733	973	138	24653	2.2575	0.011989	KIF26B
GGE	ENSG00000089248	12	112451120	112461255	11	4	24294	2.2551	0.012064	ERP29
GGE	ENSG00000023608	14	62229075	62263146	89	6	24769	2.2544	0.012086	SNAPC1
GGE	ENSG00000122025	13	28577411	28674729	212	17	24685	2.2532	0.012122	FLT3
GGE	ENSG00000173064	12	112597992	112819896	169	16	24711	2.2531	0.012125	HECTD4
GGE	ENSG00000139722	12	123349882	123380991	25	5	24737	2.2521	0.012158	VPS37B
GGE	ENSG00000157240	7	90893783	90898123	4	2	24675	2.2516	0.012173	FZD1
GGE	ENSG00000178922	1	43916824	43919660	3	1	24977	2.2515	0.012177	HYI
GGE	ENSG00000132465	4	71521258	71547534	3	1	24111	2.2507	0.012201	IGJ
GGE	ENSG00000155252	10	99344131	99436191	81	8	24810	2.2501	0.012222	PI4K2A
GGE	ENSG00000111911	6	126277927	126301387	22	2	24608	2.2489	0.01226	HINT3
GGE	ENSG00000161270	19	36316866	36360189	21	2	24549	2.2482	0.012281	NPHS1
GGE	ENSG00000151729	4	186064395	186071536	8	2	24396	2.2481	0.012285	SLC25A4
GGE	ENSG00000162585	1	2115903	2144159	11	3	24468	2.2475	0.012305	C1orf86
GGE	ENSG00000094975	1	172501489	172580971	35	4	24678	2.2468	0.012328	SUCO
GGE	ENSG00000158113	12	122652285	122688018	26	5	24729	2.2458	0.012358	LRRC43
GGE	ENSG00000132840	5	78365540	78385289	39	6	24778	2.245	0.012384	BHMT2
GGE	ENSG00000092853	1	36185819	36235568	37	5	24905	2.2444	0.012404	CLSPN
GGE	ENSG00000166128	15	63481668	63559981	135	18	24754	2.2442	0.012409	RAB8B
GGE	ENSG00000250127	5	57837394	57854070	21	4	24816	2.242	0.012482	CTD-2117L12.1
GGE	ENSG00000108826	17	48445218	48450575	7	2	24878	2.2408	0.01252	MRPL27
GGE	ENSG00000248592	3	52867137	52931578	100	9	24851	2.2406	0.012527	TMEM110-MUSTN1
GGE	ENSG00000261934	5	140782520	140892546	216	27	24713	2.2404	0.012532	PCDHGA9
GGE	ENSG00000151692	2	7057523	7208417	397	39	24829	2.2403	0.012536	RNF144A
GGE	ENSG00000135472	12	50260679	50298000	50	11	24433	2.2398	0.012552	FAIM2
GGE	ENSG00000160284	21	47581062	47604390	53	5	24592	2.2386	0.01259	SPATC1L
GGE	ENSG00000184613	12	44902058	45315631	684	62	24808	2.2382	0.012603	NELL2
GGE	ENSG00000198933	17	45771447	45789416	19	4	24563	2.2374	0.01263	TBKBP1
GGE	ENSG00000100100	22	31677579	31688520	18	5	24658	2.2364	0.012663	PIK3IP1
GGE	ENSG00000071626	19	1407568	1435719	3	1	24600	2.2362	0.012669	DAZAP1
GGE	ENSG00000173093	12	111284573	111345339	83	12	24108	2.236	0.012676	CCDC63
GGE	ENSG00000124299	19	33877856	34012700	509	50	24349	2.2354	0.012694	PEPD
GGE	ENSG00000136944	9	129376722	129463311	146	22	24667	2.2354	0.012695	LMX1B
GGE	ENSG00000168066	11	64532078	64546258	6	2	24788	2.235	0.012708	SF1
GGE	ENSG00000128655	2	178487980	178973066	1428	77	24715	2.235	0.012709	PDE11A
GGE	ENSG00000258984	2	238875656	239008053	296	14	24873	2.2337	0.01275	UBE2F-SCLY
GGE	ENSG00000162630	1	193148175	193155784	12	3	24344	2.2334	0.012761	B3GALT2
GGE	ENSG00000145675	5	67511548	67597649	160	27	24525	2.2332	0.012767	PIK3R1
GGE	ENSG00000120333	1	174979925	174992561	17	5	24932	2.2326	0.012789	MRPS14
GGE	ENSG00000119865	2	68511303	68547183	24	6	24702	2.2325	0.012791	CNRIP1
GGE	ENSG00000166886	12	57482677	57489259	6	2	24583	2.2322	0.012803	NAB2
GGE	ENSG00000116641	1	62920399	63153969	190	4	24902	2.2319	0.012812	DOCK7
GGE	ENSG00000136147	13	50069746	50103123	83	12	24808	2.2316	0.012819	PHF11
GGE	ENSG00000121680	11	45931220	45940363	7	1	24392	2.2315	0.012825	PEX16
GGE	ENSG00000151240	10	320130	735683	495	33	24712	2.2312	0.012835	DIP2C
GGE	ENSG00000048828	9	96214004	96328397	262	21	24806	2.2306	0.012853	FAM120A
GGE	ENSG00000187323	18	49866542	51057784	3575	196	24721	2.2306	0.012853	DCC
GGE	ENSG00000163046	2	132905164	133015542	23	2	23603	2.2291	0.012905	ANKRD30BL
GGE	ENSG00000165724	9	140476531	140484942	8	1	24859	2.2287	0.012917	ZMYND19
GGE	ENSG00000143801	1	227057885	227083806	50	6	24766	2.2284	0.012927	PSEN2
GGE	ENSG00000100399	22	41625517	41636938	12	3	24638	2.2272	0.012967	CHADL
GGE	ENSG00000173531	3	49721380	49726934	4	2	24694	2.2269	0.012978	MST1
GGE	ENSG00000196236	22	41253081	41363838	44	6	24400	2.2262	0.012999	XPNPEP3
GGE	ENSG00000175213	11	46722368	46727462	4	2	24933	2.226	0.013006	ZNF408
GGE	ENSG00000149972	11	98891683	100229616	4186	274	24752	2.2253	0.013032	CNTN5
GGE	ENSG00000173272	2	132222473	132250316	66	3	24656	2.2251	0.013037	MZT2A
GGE	ENSG00000177946	16	90036206	90038942	4	2	24762	2.2239	0.013078	CENPBD1
GGE	ENSG00000113722	5	149546358	149564120	22	5	24619	2.2236	0.013088	CDX1
GGE	ENSG00000177453	5	43192173	43280952	66	11	24543	2.2234	0.013095	NIM1K
GGE	ENSG00000215910	1	11821844	11849642	103	8	24708	2.2218	0.013148	C1orf167
GGE	ENSG00000187492	3	49828165	49837268	12	4	24539	2.2197	0.013219	CDHR4
GGE	ENSG00000149798	11	65082289	65089900	5	2	24377	2.2185	0.013261	CDC42EP2
GGE	ENSG00000270898	2	53897430	54087297	464	36	24789	2.2171	0.013307	ASB3
GGE	ENSG00000234409	22	20135950	20138399	8	3	24559	2.2169	0.013315	AC006547.14
GGE	ENSG00000132677	1	156339003	156355011	29	5	24763	2.2158	0.013353	RHBG
GGE	ENSG00000122034	13	27998681	28009958	35	6	24616	2.2148	0.013386	GTF3A
GGE	ENSG00000148834	10	105995114	106027217	44	10	24464	2.2147	0.013391	GSTO1
GGE	ENSG00000099998	22	24615622	24641110	36	8	24561	2.2136	0.013427	GGT5
GGE	ENSG00000152672	2	71035775	71047732	21	5	24067	2.2129	0.013452	CLEC4F
GGE	ENSG00000189164	19	37861963	37883968	24	5	24606	2.2122	0.013476	ZNF527
GGE	ENSG00000137699	11	119981983	120056237	119	17	24605	2.2112	0.013512	TRIM29
GGE	ENSG00000149927	16	30016830	30034591	19	2	24785	2.2109	0.01352	DOC2A
GGE	ENSG00000112186	6	17393447	17558023	242	30	24637	2.2109	0.013521	CAP2
GGE	ENSG00000182208	11	1490687	1522477	74	6	24680	2.2107	0.013529	MOB2
GGE	ENSG00000102974	16	67596310	67673086	62	9	24378	2.2099	0.013555	CTCF
GGE	ENSG00000196544	17	8091652	8093564	1	1	24926	2.2095	0.01357	C17orf59
GGE	ENSG00000174837	19	6887577	6940470	186	15	24479	2.2094	0.013574	EMR1
GGE	ENSG00000183638	8	10463859	10569697	113	21	24524	2.2077	0.013631	RP1L1
GGE	ENSG00000198626	1	237205505	237997288	1355	134	24621	2.2077	0.013633	RYR2
GGE	ENSG00000213533	3	52870235	52931612	93	9	24844	2.207	0.013656	TMEM110
GGE	ENSG00000015532	17	48423453	48440499	30	5	24522	2.2069	0.01366	XYLT2
GGE	ENSG00000185352	13	96743093	97485671	1331	104	24754	2.206	0.013691	HS6ST3
GGE	ENSG00000142444	19	11039409	11044211	6	2	24442	2.2044	0.013749	C19orf52
GGE	ENSG00000168497	2	192699028	192711981	2	1	24486	2.2037	0.013771	SDPR
GGE	ENSG00000137033	9	6215805	6257983	104	14	24786	2.2028	0.013806	IL33
GGE	ENSG00000173273	8	9413424	9639856	619	25	24873	2.2018	0.013841	TNKS
GGE	ENSG00000135127	12	120427673	120532298	151	11	24904	2.2017	0.013843	CCDC64
GGE	ENSG00000165731	10	43572475	43625799	165	18	24663	2.2007	0.01388	RET
GGE	ENSG00000167632	8	140742586	141468678	1376	146	24649	2.2004	0.013888	TRAPPC9
GGE	ENSG00000079805	19	10828755	10944164	209	22	24520	2.1999	0.013906	DNM2
GGE	ENSG00000165462	11	71950121	71956708	4	1	23553	2.1995	0.01392	PHOX2A
GGE	ENSG00000124302	19	34112861	34264414	133	23	24371	2.1994	0.013925	CHST8
GGE	ENSG00000269028	3	96335981	96337000	3	1	24434	2.1991	0.013934	MTRNR2L12
GGE	ENSG00000064393	7	139246316	139477577	163	18	24736	2.1985	0.013957	HIPK2
GGE	ENSG00000262484	19	39399620	39402798	3	1	24113	2.1981	0.013972	CCER2
GGE	ENSG00000151023	10	25270908	25305089	18	3	24725	2.197	0.014011	ENKUR
GGE	ENSG00000105708	19	19821280	19843906	39	7	24480	2.1968	0.014018	ZNF14
GGE	ENSG00000249967	10	99344131	99433667	75	7	24797	2.1962	0.014037	PI4K2A
GGE	ENSG00000169896	16	31271311	31344213	114	9	24667	2.1959	0.014048	ITGAM
GGE	ENSG00000177000	1	11845780	11866977	65	10	24724	2.1955	0.014063	MTHFR
GGE	ENSG00000105865	7	107203929	107218906	16	5	24777	2.1952	0.014075	DUS4L
GGE	ENSG00000158019	2	28112808	28561768	711	63	24599	2.1951	0.014077	BRE
GGE	ENSG00000213722	6	31694815	31698394	3	1	24962	2.195	0.014083	DDAH2
GGE	ENSG00000197548	3	11313995	11599139	449	28	24699	2.1945	0.014101	ATG7
GGE	ENSG00000257127	12	92815307	92824778	23	5	24766	2.1939	0.014122	CLLU1
GGE	ENSG00000173209	2	61404553	61418338	19	5	24738	2.1938	0.014124	AHSA2
GGE	ENSG00000066651	6	126307576	126360422	32	2	24782	2.1934	0.014138	TRMT11
GGE	ENSG00000071994	6	170884383	170893780	23	5	24712	2.1933	0.014142	PDCD2
GGE	ENSG00000168566	6	7590432	7612200	47	8	24895	2.1918	0.014197	SNRNP48
GGE	ENSG00000161682	17	42430583	42441243	3	1	24731	2.1908	0.014232	FAM171A2
GGE	ENSG00000254685	1	74663896	74699770	75	5	24959	2.1905	0.014243	FPGT
GGE	ENSG00000144426	2	203879602	204091101	210	16	24821	2.1902	0.014257	NBEAL1
GGE	ENSG00000112183	6	17281577	17294106	11	3	24863	2.19	0.014261	RBM24
GGE	ENSG00000133069	1	205197304	205242471	82	9	24884	2.1894	0.014282	TMCC2
GGE	ENSG00000197050	19	37498759	37621216	198	9	24697	2.188	0.014333	ZNF420
GGE	ENSG00000091181	3	3111233	3168297	9	3	24552	2.1871	0.014367	IL5RA
GGE	ENSG00000138658	4	113460492	113558151	135	14	24692	2.1871	0.014369	C4orf21
GGE	ENSG00000118113	11	102582526	102597781	54	13	24461	2.1869	0.014373	MMP8
GGE	ENSG00000165379	14	42076773	42373752	704	65	24508	2.1868	0.014377	LRFN5
GGE	ENSG00000076344	16	318300	325980	6	2	24440	2.1865	0.014389	RGS11
GGE	ENSG00000164219	5	114546527	114598569	86	13	24808	2.1847	0.014455	PGGT1B
GGE	ENSG00000242173	16	318726	333003	5	2	24467	2.1847	0.014456	ARHGDIG
GGE	ENSG00000078177	4	40058446	40159872	189	21	24873	2.1843	0.014471	N4BP2
GGE	ENSG00000162377	1	53152508	53164038	11	2	24645	2.1841	0.014477	COA7
GGE	ENSG00000130640	10	135093135	135125841	29	4	24544	2.1837	0.014493	TUBGCP2
GGE	ENSG00000272573	3	52867130	52869235	5	2	24953	2.1819	0.014558	MUSTN1
GGE	ENSG00000149532	11	61170121	61197503	10	2	24852	2.1817	0.014565	CPSF7
GGE	ENSG00000214193	1	36771988	36790484	9	2	24830	2.1806	0.014608	SH3D21
GGE	ENSG00000196975	2	69871557	70053596	228	24	24810	2.1803	0.014619	ANXA4
GGE	ENSG00000112964	5	42423879	42721979	352	31	24663	2.1793	0.014656	GHR
GGE	ENSG00000146063	5	180649499	180662809	7	2	24654	2.1791	0.014662	TRIM41
GGE	ENSG00000141076	16	69165194	69265033	12	5	24619	2.1783	0.014692	CIRH1A
GGE	ENSG00000140367	15	76135622	76193419	66	7	24448	2.177	0.014741	UBE2Q2
GGE	ENSG00000163817	3	45796942	45838027	30	9	24687	2.1766	0.014754	SLC6A20
GGE	ENSG00000118579	4	17616254	17635728	32	2	24708	2.1756	0.014792	MED28
GGE	ENSG00000244694	6	47845764	48036425	451	43	24712	2.175	0.014816	PTCHD4
GGE	ENSG00000127580	16	734622	740444	7	2	24331	2.1749	0.01482	WDR24
GGE	ENSG00000256591	11	61196692	61253294	45	3	24787	2.1747	0.014828	RP11-286N22.8
GGE	ENSG00000143479	1	206808881	206857764	3	2	24881	2.1743	0.014842	DYRK3
GGE	ENSG00000253767	5	140772381	140892546	237	28	24711	2.1743	0.014842	PCDHGA8
GGE	ENSG00000205250	16	67226072	67232821	7	2	24540	2.1739	0.014856	E2F4
GGE	ENSG00000178919	9	100615536	100618986	16	3	24859	2.1736	0.014866	FOXE1
GGE	ENSG00000135862	1	182992595	183114727	352	8	24907	2.1736	0.014868	LAMC1
GGE	ENSG00000138587	15	56713742	56757335	76	12	24780	2.1729	0.014895	MNS1
GGE	ENSG00000152926	7	64432154	64467062	92	8	24702	2.1728	0.014899	ZNF117
GGE	ENSG00000107742	10	73818793	73848790	58	7	24798	2.1723	0.014918	SPOCK2
GGE	ENSG00000184434	9	26993134	27005691	25	7	24746	2.1716	0.014941	LRRC19
GGE	ENSG00000221932	11	124789146	124790573	1	1	24564	2.1714	0.01495	HEPN1
GGE	ENSG00000159259	21	37757676	37791313	80	10	24243	2.1703	0.014992	CHAF1B
GGE	ENSG00000138439	2	203499901	203634480	105	12	24755	2.1697	0.015013	FAM117B
GGE	ENSG00000163257	4	17802278	17812381	11	2	24890	2.1697	0.015015	DCAF16
GGE	ENSG00000151468	10	12938627	13141652	442	59	24723	2.1697	0.015015	CCDC3
GGE	ENSG00000139714	12	122089024	122110537	24	5	24536	2.1689	0.015045	MORN3
GGE	ENSG00000175224	11	46638826	46696368	31	4	24864	2.1667	0.015128	ATG13
GGE	ENSG00000103266	16	730224	732870	4	2	24589	2.1662	0.015147	STUB1
GGE	ENSG00000136100	13	52986737	53024763	67	7	24603	2.1655	0.015175	VPS36
GGE	ENSG00000124570	6	2948393	2972090	79	12	24415	2.1652	0.015185	SERPINB6
GGE	ENSG00000059728	2	70124820	70170077	63	4	24860	2.165	0.015195	MXD1
GGE	ENSG00000198792	22	38615298	38669040	66	9	24708	2.1634	0.015254	TMEM184B
GGE	ENSG00000136463	17	61678231	61685725	1	1	24623	2.162	0.01531	TACO1
GGE	ENSG00000183977	3	20021453	20053822	70	9	24832	2.1602	0.015377	PP2D1
GGE	ENSG00000083099	6	90277863	90348472	135	19	24819	2.16	0.015386	LYRM2
GGE	ENSG00000143079	1	112938803	113006078	112	4	24903	2.1594	0.015409	CTTNBP2NL
GGE	ENSG00000205809	12	10579453	10594899	3	1	24767	2.1592	0.015415	KLRC2
GGE	ENSG00000122484	1	92764522	92867613	76	7	24838	2.1583	0.015452	RPAP2
GGE	ENSG00000114023	3	122103023	122131181	65	10	24661	2.1583	0.015454	FAM162A
GGE	ENSG00000159216	21	36160098	37376965	2223	162	24634	2.158	0.015463	RUNX1
GGE	ENSG00000185652	12	5541278	5630702	147	26	24695	2.1579	0.015469	NTF3
GGE	ENSG00000178878	12	12878851	12982909	43	13	24609	2.157	0.015505	APOLD1
GGE	ENSG00000133687	12	29653773	29937692	584	60	24701	2.1569	0.015508	TMTC1
GGE	ENSG00000149925	16	30064411	30081778	4	1	24666	2.1567	0.015516	ALDOA
GGE	ENSG00000143569	1	154192655	154243986	48	6	24884	2.1558	0.01555	UBAP2L
GGE	ENSG00000197343	7	99156029	99174076	18	5	24644	2.1558	0.01555	ZNF655
GGE	ENSG00000071073	2	99235569	99347589	161	18	24641	2.1556	0.015557	MGAT4A
GGE	ENSG00000165621	13	97637973	97646984	13	4	24400	2.1547	0.015591	OXGR1
GGE	ENSG00000002919	17	46180719	46200436	57	7	24745	2.1542	0.015613	SNX11
GGE	ENSG00000057704	12	94960900	95044338	214	34	24640	2.1534	0.015642	TMCC3
GGE	ENSG00000168952	14	25278862	25519503	625	73	24782	2.1527	0.01567	STXBP6
GGE	ENSG00000119915	10	103986085	103989346	4	2	24428	2.1524	0.015684	ELOVL3
GGE	ENSG00000163935	3	52937588	53080766	208	16	24904	2.1519	0.015702	SFMBT1
GGE	ENSG00000175029	10	126676421	126849739	393	59	24673	2.1518	0.015708	CTBP2
GGE	ENSG00000083799	16	50775961	50835846	57	7	24770	2.1513	0.015725	CYLD
GGE	ENSG00000186377	1	47427036	47516423	107	11	24665	2.1497	0.015791	CYP4X1
GGE	ENSG00000081237	1	198607801	198726545	65	9	24328	2.1496	0.015792	PTPRC
GGE	ENSG00000163982	4	4190530	4228616	37	5	24454	2.1493	0.015804	OTOP1
GGE	ENSG00000213578	15	75118888	75124141	6	2	24778	2.1493	0.015806	CPLX3
GGE	ENSG00000142197	21	37529080	37666572	423	53	24701	2.1487	0.015827	DOPEY2
GGE	ENSG00000162676	1	92940319	92952433	14	2	24931	2.1457	0.015948	GFI1
GGE	ENSG00000148337	9	130928343	130966662	60	9	24617	2.1449	0.015982	CIZ1
GGE	ENSG00000151014	4	139936943	139966906	23	5	24512	2.1445	0.015997	CCRN4L
GGE	ENSG00000180198	1	28832455	28865812	47	5	24494	2.1424	0.016079	RCC1
GGE	ENSG00000198546	10	135121979	135166033	35	5	24514	2.1417	0.016109	ZNF511
GGE	ENSG00000130643	10	135138927	135150475	12	3	24564	2.141	0.016135	CALY
GGE	ENSG00000179399	13	92050929	93519490	2452	175	24770	2.141	0.016138	GPC5
GGE	ENSG00000103723	15	83328033	83378666	87	15	24530	2.1403	0.016163	AP3B2
GGE	ENSG00000023516	13	42846289	42897396	69	6	24874	2.1398	0.016185	AKAP11
GGE	ENSG00000129465	14	24805227	24809251	15	4	24737	2.1388	0.016224	RIPK3
GGE	ENSG00000253953	5	140767452	140892546	243	29	24715	2.1376	0.016275	PCDHGB4
GGE	ENSG00000006432	14	71189243	71276251	231	24	24735	2.1371	0.016294	MAP3K9
GGE	ENSG00000149926	16	30035748	30064299	26	3	24762	2.1352	0.016373	FAM57B
GGE	ENSG00000173992	11	66360292	66373490	7	3	24798	2.1344	0.016405	CCS
GGE	ENSG00000117983	11	1244296	1283406	40	6	24172	2.1342	0.016413	MUC5B
GGE	ENSG00000111142	12	95867296	95909615	109	12	24869	2.1342	0.016413	METAP2
GGE	ENSG00000103966	15	42190950	42264776	133	19	24699	2.1335	0.016442	EHD4
GGE	ENSG00000108849	17	42018172	42019836	3	1	24781	2.1323	0.016493	PPY
GGE	ENSG00000078687	17	76000249	76104916	142	15	24635	2.1321	0.016499	TNRC6C
GGE	ENSG00000104825	19	39390340	39399533	12	3	24199	2.1317	0.016514	NFKBIB
GGE	ENSG00000123191	13	52506809	52585630	153	15	24702	2.1314	0.016527	ATP7B
GGE	ENSG00000168256	17	40163400	40177659	4	2	24081	2.1311	0.016541	NKIRAS2
GGE	ENSG00000137968	1	75667816	76076801	706	55	24854	2.131	0.016544	SLC44A5
GGE	ENSG00000061492	5	137419581	137428054	10	3	24917	2.1303	0.016574	WNT8A
GGE	ENSG00000100083	22	38004481	38029571	9	2	24720	2.1297	0.0166	GGA1
GGE	ENSG00000186314	5	144851362	145214932	643	42	24730	2.1292	0.01662	PRELID2
GGE	ENSG00000100359	22	40766595	40806293	35	4	24469	2.1291	0.016623	SGSM3
GGE	ENSG00000174145	4	37245842	37451087	429	61	24753	2.1289	0.016633	KIAA1239
GGE	ENSG00000168116	6	56911347	56920023	4	1	24992	2.1283	0.016656	KIAA1586
GGE	ENSG00000117472	1	46640745	46651630	7	3	24501	2.1274	0.016693	TSPAN1
GGE	ENSG00000105698	19	35759881	35770724	20	3	24709	2.1251	0.016791	USF2
GGE	ENSG00000134996	9	77703459	77762181	164	25	24604	2.1249	0.016797	OSTF1
GGE	ENSG00000088992	12	117476728	117537284	81	6	24642	2.1246	0.016811	TESC
GGE	ENSG00000094916	12	54624724	54673886	19	2	24826	2.124	0.016835	CBX5
GGE	ENSG00000102572	13	99102455	99230194	274	27	24692	2.1235	0.016856	STK24
GGE	ENSG00000196071	1	248100493	248264224	290	22	24704	2.1232	0.016869	OR2L13
GGE	ENSG00000119973	10	120352916	120355160	6	2	24300	2.1228	0.016884	PRLHR
GGE	ENSG00000110395	11	119076752	119178859	57	4	24712	2.1225	0.016899	CBL
GGE	ENSG00000165684	9	139270029	139293249	47	4	24751	2.1221	0.016913	SNAPC4
GGE	ENSG00000204566	10	23492745	23528745	34	6	24705	2.1204	0.016985	C10orf115
GGE	ENSG00000163788	3	43328004	43466256	103	13	24756	2.1198	0.017011	SNRK
GGE	ENSG00000088538	3	50712672	51421629	968	22	24834	2.1195	0.017022	DOCK3
GGE	ENSG00000153015	5	64064757	64314590	358	16	24918	2.1186	0.017064	CWC27
GGE	ENSG00000140443	15	99192200	99507759	396	59	24630	2.1175	0.017108	IGF1R
GGE	ENSG00000144566	3	19988571	20026667	74	9	24875	2.1175	0.017109	RAB5A
GGE	ENSG00000142606	1	2522078	2564481	85	2	24750	2.1171	0.017124	MMEL1
GGE	ENSG00000103064	16	68298433	68335722	35	7	24728	2.1164	0.017157	SLC7A6
GGE	ENSG00000151665	2	46808076	46844258	67	9	24687	2.1147	0.017229	PIGF
GGE	ENSG00000104219	8	17013538	17082308	139	26	24403	2.1145	0.017234	ZDHHC2
GGE	ENSG00000204671	12	122656577	122658746	4	1	24794	2.1145	0.017237	IL31
GGE	ENSG00000169783	15	77905369	78113242	488	48	24725	2.1141	0.017254	LINGO1
GGE	ENSG00000101158	20	57556263	57570188	11	3	24621	2.1118	0.017351	NELFCD
GGE	ENSG00000174227	4	492989	533985	80	3	24783	2.1118	0.017353	PIGG
GGE	ENSG00000166197	10	103911933	103923627	10	3	24661	2.1108	0.017396	NOLC1
GGE	ENSG00000078304	14	102228135	102394326	301	34	24608	2.1103	0.017414	PPP2R5C
GGE	ENSG00000167985	11	61197514	61215001	15	2	24811	2.11	0.01743	SDHAF2
GGE	ENSG00000058063	3	182511288	182639423	189	9	24923	2.1098	0.017439	ATP11B
GGE	ENSG00000139220	12	81652045	82153332	913	92	24748	2.1098	0.017439	PPFIA2
GGE	ENSG00000143669	1	235824341	236046940	188	11	24814	2.1092	0.017462	LYST
GGE	ENSG00000165997	10	18948334	18970568	49	8	24668	2.1087	0.017486	ARL5B
GGE	ENSG00000033178	4	68478370	68566897	212	11	24779	2.1084	0.017498	UBA6
GGE	ENSG00000119446	9	124999903	125027118	35	3	24718	2.107	0.01756	RBM18
GGE	ENSG00000170049	17	7825177	7833121	6	1	24588	2.1066	0.017575	KCNAB3
GGE	ENSG00000132518	17	7905912	7923657	7	2	24623	2.1047	0.017659	GUCY2D
GGE	ENSG00000170477	12	53200333	53208335	15	4	24815	2.1041	0.017685	KRT4
GGE	ENSG00000163576	3	19920964	19988517	126	15	24834	2.104	0.017688	EFHB
GGE	ENSG00000185873	4	69092371	69111438	12	1	24684	2.1026	0.01775	TMPRSS11B
GGE	ENSG00000169856	15	53049637	53083273	36	9	24545	2.1015	0.017797	ONECUT1
GGE	ENSG00000111300	12	112464500	112546826	58	9	24701	2.101	0.017823	NAA25
GGE	ENSG00000101444	20	32868074	32899608	24	2	24831	2.1001	0.017858	AHCY
GGE	ENSG00000174564	3	136665072	136729927	87	5	24910	2.1001	0.017861	IL20RB
GGE	ENSG00000196224	11	1628795	1629693	5	3	24612	2.1	0.017863	KRTAP5-3
GGE	ENSG00000089486	16	4560676	4588829	32	3	24730	2.0999	0.017869	CDIP1
GGE	ENSG00000203993	9	140509784	140513358	1	1	24256	2.0996	0.01788	C9orf37
GGE	ENSG00000198270	12	112369086	112450970	114	6	24893	2.0996	0.017883	TMEM116
GGE	ENSG00000145283	4	87744621	87770416	19	6	24758	2.0987	0.017922	SLC10A6
GGE	ENSG00000165521	14	89078775	89259096	258	19	24795	2.0984	0.017933	EML5
GGE	ENSG00000151322	14	33404139	34273382	1466	208	24598	2.0982	0.017943	NPAS3
GGE	ENSG00000110721	11	67820326	67888911	50	5	24770	2.0971	0.017992	CHKA
GGE	ENSG00000145242	4	66185281	66536213	891	106	24714	2.0949	0.018092	EPHA5
GGE	ENSG00000173898	11	66452719	66496697	14	5	24631	2.0944	0.018112	SPTBN2
GGE	ENSG00000126522	7	65540785	65558545	30	4	24760	2.094	0.018131	ASL
GGE	ENSG00000114812	3	42530791	42579059	59	11	24567	2.0938	0.018139	VIPR1
GGE	ENSG00000169181	16	27798850	28074830	504	80	24713	2.0928	0.018183	GSG1L
GGE	ENSG00000008018	6	170844205	170862429	55	7	24718	2.0928	0.018185	PSMB1
GGE	ENSG00000179344	6	32627244	32636160	3	1	24387	2.0926	0.018193	HLA-DQB1
GGE	ENSG00000111727	12	104458235	104498639	71	12	24740	2.0921	0.018214	HCFC2
GGE	ENSG00000153207	1	247002400	247095280	117	12	24734	2.0918	0.018228	AHCTF1
GGE	ENSG00000066322	1	43829068	43833696	1	1	24975	2.0915	0.01824	ELOVL1
GGE	ENSG00000103067	16	68263014	68272005	4	2	24774	2.0903	0.018293	ESRP2
GGE	ENSG00000102837	13	53602894	53626192	48	12	24675	2.0902	0.018302	OLFM4
GGE	ENSG00000125877	20	3189514	3204516	48	9	24748	2.0898	0.018317	ITPA
GGE	ENSG00000074657	18	56529832	56653712	227	24	24808	2.0898	0.01832	ZNF532
GGE	ENSG00000146215	6	43267448	43276535	6	3	24426	2.0893	0.018341	CRIP3
GGE	ENSG00000162972	2	200820040	200873263	78	12	24731	2.0893	0.018342	C2orf47
GGE	ENSG00000179133	10	23556124	23633774	115	12	24782	2.0892	0.018345	C10orf67
GGE	ENSG00000118276	18	29202210	29265799	88	13	24725	2.0889	0.018358	B4GALT6
GGE	ENSG00000148399	9	140449356	140473387	12	1	24763	2.0889	0.018359	DPH7
GGE	ENSG00000173653	11	66610306	66614017	1	1	24978	2.0884	0.01838	RCE1
GGE	ENSG00000156453	5	141232938	141258811	5	2	24587	2.0882	0.018389	PCDH1
GGE	ENSG00000125965	20	34021145	34042568	16	4	24540	2.0878	0.01841	GDF5
GGE	ENSG00000196305	9	94972489	95056038	151	11	24403	2.0869	0.018447	IARS
GGE	ENSG00000178460	8	67782984	67834283	33	4	24695	2.0862	0.018481	MCMDC2
GGE	ENSG00000205089	5	132083137	132089856	4	1	24848	2.0859	0.018492	CCNI2
GGE	ENSG00000163348	1	154929502	154936329	2	1	23657	2.0857	0.018502	PYGO2
GGE	ENSG00000236311	10	102849078	102890883	91	13	24646	2.0855	0.01851	TLX1NB
GGE	ENSG00000115604	2	102927989	103015218	243	16	24882	2.0852	0.018526	IL18R1
GGE	ENSG00000015153	12	42550906	42632151	103	11	24871	2.0851	0.018529	YAF2
GGE	ENSG00000077097	3	25639475	25706398	102	8	24465	2.085	0.018535	TOP2B
GGE	ENSG00000104626	8	8859657	8974256	305	28	24669	2.0845	0.018558	ERI1
GGE	ENSG00000138316	10	72432559	72522197	319	48	24721	2.0835	0.018605	ADAMTS14
GGE	ENSG00000141441	18	29704840	30050447	702	68	24743	2.0834	0.018608	GAREM
GGE	ENSG00000135953	2	103332299	103353347	25	4	24838	2.0831	0.01862	MFSD9
GGE	ENSG00000241058	10	18834490	18940551	276	15	24885	2.0819	0.018674	NSUN6
GGE	ENSG00000146676	7	44915896	44924960	6	2	24951	2.0818	0.018678	PURB
GGE	ENSG00000243955	6	52656462	52668708	20	3	24799	2.0816	0.018689	GSTA1
GGE	ENSG00000136146	13	48627459	48669267	117	17	24679	2.0815	0.018695	MED4
GGE	ENSG00000165917	11	47459308	47470730	25	4	24915	2.0803	0.018749	RAPSN
GGE	ENSG00000100243	22	43013846	43045574	70	8	24730	2.08	0.018763	CYB5R3
GGE	ENSG00000164506	6	147525561	147706866	172	11	24286	2.0792	0.018799	STXBP5
GGE	ENSG00000226894	4	69054242	69083798	31	1	24868	2.0791	0.018804	TMPRSS11BNL
GGE	ENSG00000172774	11	57982217	57983195	7	2	24909	2.0787	0.01882	OR1S1
GGE	ENSG00000067208	1	92974253	93257961	423	14	24936	2.0782	0.018846	EVI5
GGE	ENSG00000155438	2	122484521	122494499	15	2	24883	2.0773	0.018887	NIFK
GGE	ENSG00000173366	3	52255097	52265206	6	2	24583	2.0771	0.018895	TLR9
GGE	ENSG00000101138	20	54967427	54979518	8	2	24587	2.0771	0.018897	CSTF1
GGE	ENSG00000196693	10	43084555	43133992	88	11	24745	2.0763	0.018934	ZNF33B
GGE	ENSG00000137642	11	121322912	121504402	208	31	24568	2.0762	0.018936	SORL1
GGE	ENSG00000145016	3	197398264	197476598	94	4	24677	2.0762	0.018938	KIAA0226
GGE	ENSG00000106636	7	44240567	44253893	10	3	24678	2.0761	0.018942	YKT6
GGE	ENSG00000256087	19	52534632	52598991	130	10	24656	2.075	0.018995	ZNF432
GGE	ENSG00000168259	17	40128451	40173394	2	1	24927	2.0748	0.019002	DNAJC7
GGE	ENSG00000107262	9	33247818	33264761	15	3	24793	2.0743	0.019025	BAG1
GGE	ENSG00000197728	12	56435637	56438116	2	1	24070	2.0722	0.019121	RPS26
GGE	ENSG00000140522	15	89753100	89764982	18	4	24598	2.072	0.019133	RLBP1
GGE	ENSG00000125107	16	58553855	58663790	263	14	24728	2.0717	0.019146	CNOT1
GGE	ENSG00000165516	14	50234326	50249909	1	1	24281	2.0708	0.01919	KLHDC2
GGE	ENSG00000215906	1	23279536	23291831	20	4	24613	2.0705	0.019201	LACTBL1
GGE	ENSG00000136444	17	48556161	48563336	9	2	24691	2.0698	0.019233	RSAD1
GGE	ENSG00000134308	2	9724101	9771143	72	8	24652	2.0688	0.019285	YWHAQ
GGE	ENSG00000100604	14	93389425	93401638	19	4	24587	2.067	0.019368	CHGA
GGE	ENSG00000125835	20	2442280	2451499	8	2	24859	2.0668	0.019374	SNRPB
GGE	ENSG00000122966	12	120123595	120315095	312	30	24626	2.0668	0.019375	CIT
GGE	ENSG00000143171	1	165370159	165414433	148	23	24648	2.0668	0.019378	RXRG
GGE	ENSG00000179930	1	182023705	182030847	7	2	24953	2.0664	0.019394	ZNF648
GGE	ENSG00000105989	7	116916685	116963343	34	7	24585	2.0664	0.019396	WNT2
GGE	ENSG00000204186	2	207139387	207179148	34	3	24931	2.0648	0.019472	ZDBF2
GGE	ENSG00000143575	1	154244987	154248351	1	1	24990	2.0636	0.01953	HAX1
GGE	ENSG00000165091	9	75136717	75451267	770	43	24794	2.0635	0.01953	TMC1
GGE	ENSG00000171791	18	60790579	60987361	209	38	24708	2.0628	0.019564	BCL2
GGE	ENSG00000099326	19	59073298	59084942	13	3	24605	2.0604	0.019681	MZF1
GGE	ENSG00000184144	1	205012325	205047627	94	12	24772	2.06	0.019702	CNTN2
GGE	ENSG00000170954	19	53611132	53636330	19	3	24679	2.0597	0.019713	ZNF415
GGE	ENSG00000168003	11	62623518	62656352	18	4	24661	2.0594	0.019729	SLC3A2
GGE	ENSG00000164270	5	147830595	148056798	370	36	24657	2.0581	0.019788	HTR4
GGE	ENSG00000124120	20	43104526	43123244	14	2	24601	2.0571	0.019837	TTPAL
GGE	ENSG00000223638	19	56270380	56274541	3	1	24203	2.0569	0.01985	RFPL4A
GGE	ENSG00000250641	6	31674681	31685695	9	4	24521	2.0562	0.019884	MEGT1
GGE	ENSG00000170703	17	46839597	46894576	121	13	24766	2.0551	0.019933	TTLL6
GGE	ENSG00000182771	10	87359312	88126250	1386	146	24625	2.0548	0.019948	GRID1
GGE	ENSG00000036565	8	20002366	20040717	102	12	24745	2.0547	0.019956	SLC18A1
GGE	ENSG00000180592	10	21802407	21814611	6	3	24322	2.0539	0.019995	SKIDA1
GGE	ENSG00000148840	10	103892787	103910082	11	4	24497	2.0523	0.020068	PPRC1
GGE	ENSG00000184731	2	38814	46870	8	3	24197	2.0514	0.020114	FAM110C
GGE	ENSG00000137513	11	78147007	78285919	242	6	24877	2.0512	0.020124	NARS2
GGE	ENSG00000253537	5	140762467	140892546	256	29	24720	2.0505	0.020157	PCDHGA7
GGE	ENSG00000179562	7	127220672	127233665	33	8	24690	2.0504	0.020165	GCC1
GGE	ENSG00000161298	19	37095719	37119499	25	4	24712	2.0495	0.020208	ZNF382
GGE	ENSG00000120896	8	22402499	22433301	6	1	24371	2.0481	0.020274	SORBS3
GGE	ENSG00000132781	1	45794835	45806142	9	4	24490	2.0473	0.020315	MUTYH
GGE	ENSG00000257218	12	120884241	120899389	32	7	24688	2.0472	0.020318	GATC
GGE	ENSG00000159527	1	153270338	153283194	24	4	24667	2.0469	0.020336	PGLYRP3
GGE	ENSG00000167280	17	77071021	77084681	12	3	24497	2.0469	0.020336	ENGASE
GGE	ENSG00000129559	14	24686058	24701660	8	3	24539	2.0468	0.020337	NEDD8
GGE	ENSG00000172428	2	241065980	241076224	36	6	24495	2.0464	0.020358	MYEOV2
GGE	ENSG00000068489	17	57232860	57282066	50	6	24788	2.046	0.02038	PRR11
GGE	ENSG00000185009	10	75881524	75910821	40	5	24897	2.0456	0.020398	AP3M1
GGE	ENSG00000124237	20	56725960	56736206	10	2	24623	2.0443	0.020461	C20orf85
GGE	ENSG00000136856	9	130159421	130170703	18	3	24743	2.0438	0.020489	SLC2A8
GGE	ENSG00000255737	12	58120054	58122139	1	1	24977	2.0437	0.02049	AGAP2-AS1
GGE	ENSG00000136327	14	37049784	37051812	2	1	24895	2.0434	0.020505	NKX2-8
GGE	ENSG00000164900	7	150845676	150871832	21	3	24549	2.0433	0.020511	GBX1
GGE	ENSG00000171307	10	99205927	99217127	11	3	24851	2.0428	0.020536	ZDHHC16
GGE	ENSG00000065809	10	14560556	14816896	664	99	24646	2.0427	0.02054	FAM107B
GGE	ENSG00000198466	19	58361225	58376480	27	5	24355	2.0409	0.020628	ZNF587
GGE	ENSG00000117400	1	43803478	43818443	9	2	24736	2.0404	0.020657	MPL
GGE	ENSG00000008226	3	38080696	38165516	134	11	24747	2.0399	0.020678	DLEC1
GGE	ENSG00000145147	4	20254883	20622184	482	66	24718	2.039	0.020724	SLIT2
GGE	ENSG00000188729	3	190917030	190983404	133	19	24651	2.0386	0.020743	OSTN
GGE	ENSG00000151151	10	59951278	60027694	238	9	24827	2.0381	0.020768	IPMK
GGE	ENSG00000253148	1	192286122	192336415	62	5	24673	2.0379	0.020781	RGS21
GGE	ENSG00000167747	19	51300961	51308186	14	2	24691	2.0378	0.020786	C19orf48
GGE	ENSG00000115524	2	198254508	198299815	17	3	24799	2.0374	0.020804	SF3B1
GGE	ENSG00000142082	11	215458	236931	96	10	24739	2.0371	0.020822	SIRT3
GGE	ENSG00000251322	22	51112843	51171726	44	11	24439	2.037	0.020823	SHANK3
GGE	ENSG00000134042	18	48324574	48351772	55	12	24642	2.037	0.020825	MRO
GGE	ENSG00000198650	16	71599563	71611033	16	6	24691	2.0361	0.020869	TAT
GGE	ENSG00000104343	8	74692332	74791145	77	10	24562	2.0351	0.020922	UBE2W
GGE	ENSG00000175600	7	40174575	40900362	754	71	24782	2.0347	0.020938	SUGCT
GGE	ENSG00000099901	22	20103461	20114878	12	5	24821	2.0346	0.020947	RANBP1
GGE	ENSG00000135439	12	58118980	58135940	13	3	24754	2.034	0.020976	AGAP2
GGE	ENSG00000182628	17	57187312	57232630	35	6	24706	2.0337	0.020989	SKA2
GGE	ENSG00000119729	2	46768945	46810260	73	14	24659	2.0334	0.021008	RHOQ
GGE	ENSG00000071282	3	8543393	8609805	198	18	24726	2.0333	0.02101	LMCD1
GGE	ENSG00000151704	11	128706210	128737268	63	10	24786	2.0328	0.021038	KCNJ1
GGE	ENSG00000186472	7	82383329	82792246	758	65	24746	2.0327	0.021042	PCLO
GGE	ENSG00000152556	12	48498922	48540187	78	10	24865	2.032	0.021075	PFKM
GGE	ENSG00000112149	6	14117872	14137149	31	7	24617	2.0315	0.0211	CD83
GGE	ENSG00000254834	11	56344212	56345263	2	1	24969	2.0315	0.021102	OR5M10
GGE	ENSG00000153914	5	65435799	65479443	46	5	24842	2.0313	0.021114	SREK1
GGE	ENSG00000108474	17	16120505	16252115	189	12	24781	2.0307	0.021144	PIGL
GGE	ENSG00000165480	13	21727734	21750741	43	6	24704	2.0306	0.021149	SKA3
GGE	ENSG00000241322	17	15468798	15522826	2	1	24400	2.0305	0.02115	CDRT1
GGE	ENSG00000124635	6	27093676	27100541	8	3	24696	2.0305	0.021152	HIST1H2BJ
GGE	ENSG00000124160	20	44689624	44718591	43	7	24388	2.0305	0.021154	NCOA5
GGE	ENSG00000166948	20	2361554	2413399	139	16	24791	2.0298	0.02119	TGM6
GGE	ENSG00000118007	3	136055077	136471220	440	28	24712	2.0297	0.021191	STAG1
GGE	ENSG00000163629	4	87515468	87736324	482	21	24628	2.0293	0.021213	PTPN13
GGE	ENSG00000044012	1	42619092	42621495	6	3	24908	2.0291	0.021227	GUCA2B
GGE	ENSG00000099991	22	24407642	24574596	159	16	24519	2.0289	0.021235	CABIN1
GGE	ENSG00000183114	1	20878932	20881512	3	1	24982	2.028	0.02128	FAM43B
GGE	ENSG00000138675	4	81187753	81257834	97	17	24651	2.0278	0.021291	FGF5
GGE	ENSG00000133895	11	64570982	64578766	4	1	24874	2.0277	0.021297	MEN1
GGE	ENSG00000248712	11	119060347	119067479	5	2	24521	2.0277	0.021298	CCDC153
GGE	ENSG00000175857	5	57787262	57792917	5	2	24956	2.0269	0.021338	GAPT
GGE	ENSG00000119919	10	101292690	101296278	7	2	24763	2.0266	0.02135	NKX2-3
GGE	ENSG00000167194	16	30034655	30039057	1	1	24907	2.0262	0.02137	C16orf92
GGE	ENSG00000127824	2	220114433	220142892	16	3	24730	2.0257	0.021397	TUBA4A
GGE	ENSG00000136274	7	45120037	45128513	20	5	24808	2.0256	0.021404	NACAD
GGE	ENSG00000128191	22	20067755	20099400	82	10	24899	2.0256	0.021404	DGCR8
GGE	ENSG00000153406	16	4511681	4545764	41	2	24746	2.0248	0.021445	NMRAL1
GGE	ENSG00000213024	19	50410082	50433020	28	4	24527	2.0247	0.021447	NUP62
GGE	ENSG00000087269	4	2939660	2965112	34	4	24733	2.0242	0.021472	NOP14
GGE	ENSG00000179965	16	30418618	30440920	7	2	24197	2.0239	0.021491	ZNF771
GGE	ENSG00000104951	19	50392911	50432796	29	4	24530	2.0235	0.02151	IL4I1
GGE	ENSG00000189007	6	143743969	143771810	67	3	24948	2.0233	0.02152	ADAT2
GGE	ENSG00000167207	16	50727514	50766988	43	5	24669	2.0227	0.021549	NOD2
GGE	ENSG00000117523	1	171454651	171562650	198	14	24934	2.0223	0.021574	PRRC2C
GGE	ENSG00000136891	9	103064359	103115221	86	8	24675	2.0221	0.021585	TEX10
GGE	ENSG00000136141	13	47127303	47327175	377	39	24837	2.022	0.021586	LRCH1
GGE	ENSG00000183091	2	152341850	152591001	270	28	24715	2.0212	0.021627	NEB
GGE	ENSG00000171792	12	2985424	2998626	20	1	24534	2.0213	0.021627	RHNO1
GGE	ENSG00000118420	6	83602117	83775560	366	27	24594	2.0208	0.021651	UBE3D
GGE	ENSG00000140987	16	3432085	3451065	33	7	24686	2.0203	0.021674	ZSCAN32
GGE	ENSG00000177182	8	61969717	62414204	951	83	24733	2.0199	0.021695	CLVS1
GGE	ENSG00000158186	3	138066539	138124375	91	8	24831	2.0195	0.02172	MRAS
GGE	ENSG00000164825	8	6728097	6735544	16	3	24694	2.0194	0.021722	DEFB1
GGE	ENSG00000171159	9	130922539	130926207	3	1	24903	2.0176	0.021815	C9orf16
GGE	ENSG00000141753	17	38599702	38613983	3	2	24888	2.0168	0.021856	IGFBP4
GGE	ENSG00000164061	3	49591922	49708978	120	10	24842	2.0167	0.021865	BSN
GGE	ENSG00000165476	10	65281123	65384883	186	18	24716	2.0161	0.021897	REEP3
GGE	ENSG00000240053	6	31637944	31641553	1	1	24684	2.016	0.0219	LY6G5B
GGE	ENSG00000144867	3	133502877	133544616	63	12	24656	2.0156	0.02192	SRPRB
GGE	ENSG00000122033	13	28009776	28024739	43	7	24621	2.0153	0.021937	MTIF3
GGE	ENSG00000138083	2	45168902	45173216	6	2	24385	2.0152	0.021941	SIX3
GGE	ENSG00000144868	3	132757235	133116636	882	71	24726	2.0148	0.021961	TMEM108
GGE	ENSG00000088812	20	3451687	3631769	358	21	24608	2.0136	0.022026	ATRN
GGE	ENSG00000198216	1	181382238	181777219	726	87	24722	2.0132	0.022047	CACNA1E
GGE	ENSG00000148814	10	134145614	134195010	128	13	24709	2.0129	0.02206	LRRC27
GGE	ENSG00000077150	10	104153867	104162281	8	4	24704	2.0121	0.022106	NFKB2
GGE	ENSG00000188710	9	133768815	133769225	1	1	24319	2.0118	0.02212	QRFP
GGE	ENSG00000179044	16	67218269	67224107	5	1	24876	2.0115	0.022136	EXOC3L1
GGE	ENSG00000166670	11	102641234	102651359	20	4	24788	2.0114	0.022141	MMP10
GGE	ENSG00000174684	11	66112843	66115163	1	1	24747	2.0109	0.02217	B3GNT1
GGE	ENSG00000183783	4	44175926	44450824	387	44	24723	2.0107	0.022179	KCTD8
GGE	ENSG00000167183	17	46029333	46035244	17	5	24861	2.0106	0.022182	PRR15L
GGE	ENSG00000165030	9	94171327	94186144	20	3	24817	2.0105	0.022187	NFIL3
GGE	ENSG00000168671	5	36035119	36071460	99	15	24717	2.0103	0.0222	UGT3A2
GGE	ENSG00000226979	6	31539831	31542101	2	1	24982	2.0103	0.0222	LTA
GGE	ENSG00000213246	17	56422539	56430454	20	6	24442	2.0099	0.022223	SUPT4H1
GGE	ENSG00000167447	17	57286761	57292608	4	2	24774	2.009	0.022266	SMG8
GGE	ENSG00000110851	12	108126643	108155049	57	5	24933	2.0087	0.022285	PRDM4
GGE	ENSG00000137193	6	37137979	37143202	3	1	24630	2.0076	0.022341	PIM1
GGE	ENSG00000241794	1	153028589	153030013	2	1	24630	2.0075	0.022349	SPRR2A
GGE	ENSG00000003147	7	8152814	8302317	214	38	24564	2.0068	0.022386	ICA1
GGE	ENSG00000137673	11	102391239	102401484	16	2	24952	2.0064	0.022409	MMP7
GGE	ENSG00000170899	6	52842751	52860176	68	9	24879	2.0061	0.022425	GSTA4
GGE	ENSG00000166257	11	123499895	123525952	41	4	24846	2.0056	0.022447	SCN3B
GGE	ENSG00000145868	5	147763498	147822399	47	4	24723	2.0056	0.022451	FBXO38
GGE	ENSG00000168487	8	22022249	22069839	35	5	24508	2.0055	0.022453	BMP1
GGE	ENSG00000115694	2	242432089	242449145	32	7	24710	2.0047	0.022496	STK25
GGE	ENSG00000204669	9	74666292	74687733	45	9	24675	2.0042	0.022525	C9orf57
GGE	ENSG00000172638	11	65633912	65641063	9	2	24728	2.0042	0.022525	EFEMP2
GGE	ENSG00000140105	14	100800125	100843142	69	3	24800	2.0038	0.022543	WARS
GGE	ENSG00000164604	7	112718386	112727833	5	2	24494	2.0034	0.022569	GPR85
GGE	ENSG00000166171	10	103330317	103369425	48	5	24905	2.0031	0.022584	DPCD
GGE	ENSG00000178685	8	145051321	145086940	2	1	24831	2.0028	0.022598	PARP10
GGE	ENSG00000167380	19	44669226	44682534	7	2	24603	2.0017	0.022656	ZNF226
GGE	ENSG00000117016	1	41086351	41131329	91	13	24800	2.0012	0.022687	RIMS3
GGE	ENSG00000182557	17	4336983	4391503	47	8	24610	2.0009	0.022699	SPNS3
GGE	ENSG00000167434	17	58227297	58248260	9	2	24565	2.0006	0.022719	CA4
GGE	ENSG00000116299	1	109656301	109749401	149	18	24622	2.0005	0.02272	KIAA1324
GGE	ENSG00000149782	11	64018995	64036622	17	6	24638	2.0003	0.022733	PLCB3
GGE	ENSG00000139132	12	32552463	32798984	755	76	24593	2.0002	0.02274	FGD4
GGE	ENSG00000135929	2	219646472	219680016	61	4	24714	2.0001	0.022745	CYP27A1
GGE	ENSG00000058056	3	179370543	179507189	207	28	24714	1.9999	0.022753	USP13
GGE	ENSG00000130803	19	9251056	9274100	74	8	24530	1.9999	0.022756	ZNF317
GGE	ENSG00000161542	17	74305567	74380602	54	8	24752	1.9995	0.022778	PRPSAP1
GGE	ENSG00000198198	1	43855553	43918321	65	5	24855	1.9986	0.022823	SZT2
GGE	ENSG00000100105	22	31721790	31742218	21	8	24008	1.9983	0.022841	PATZ1
GGE	ENSG00000104147	15	41601466	41624819	44	6	24698	1.9979	0.022864	OIP5
GGE	ENSG00000124380	2	70120692	70132707	13	2	24878	1.9978	0.022867	SNRNP27
GGE	ENSG00000181045	17	78193498	78227299	62	9	24559	1.9963	0.022951	SLC26A11
GGE	ENSG00000008083	6	15246527	15522252	524	59	24742	1.9958	0.022978	JARID2
GGE	ENSG00000176387	16	67464555	67471456	6	3	24285	1.9949	0.023027	HSD11B2
GGE	ENSG00000125122	16	67241042	67260951	16	3	24730	1.9937	0.023095	LRRC29
GGE	ENSG00000238243	1	248031277	248060449	39	7	24665	1.9934	0.023107	OR2W3
GGE	ENSG00000141503	17	4736683	4801356	97	10	24813	1.9933	0.023115	MINK1
GGE	ENSG00000126091	1	44171495	44396831	387	26	24928	1.9927	0.023148	ST3GAL3
GGE	ENSG00000149564	11	124622026	124632186	8	2	24638	1.9923	0.023168	ESAM
GGE	ENSG00000175387	18	45357922	45457515	104	5	24770	1.9922	0.023175	SMAD2
GGE	ENSG00000140044	14	75894419	75940814	82	12	24594	1.9913	0.023223	JDP2
GGE	ENSG00000164920	8	99956631	99964332	3	1	24879	1.9894	0.023329	OSR2
GGE	ENSG00000022567	8	142217265	142318404	191	26	24670	1.9893	0.023331	SLC45A4
GGE	ENSG00000169902	7	65670186	65885530	297	13	24276	1.9891	0.023344	TPST1
GGE	ENSG00000175229	11	65809423	65816651	9	3	24853	1.9884	0.023383	GAL3ST3
GGE	ENSG00000122711	9	33218363	33248565	81	6	24857	1.9884	0.023384	SPINK4
GGE	ENSG00000120254	6	151186685	151423023	680	71	24470	1.9877	0.023421	MTHFD1L
GGE	ENSG00000143303	1	156698234	156706752	11	4	24732	1.987	0.023458	RRNAD1
GGE	ENSG00000019186	20	52769988	52790512	40	5	24759	1.986	0.023517	CYP24A1
GGE	ENSG00000187049	11	61159159	61166335	5	1	24864	1.9853	0.023557	TMEM216
GGE	ENSG00000182247	3	23244511	23633284	1061	34	24658	1.9846	0.023596	UBE2E2
GGE	ENSG00000100276	22	29708922	29715668	4	2	24696	1.9843	0.02361	RASL10A
GGE	ENSG00000008311	7	121715701	121784334	107	14	24735	1.9839	0.023633	AASS
GGE	ENSG00000104835	19	39405906	39440495	51	6	24296	1.9834	0.023663	SARS2
GGE	ENSG00000255823	11	10529434	10530723	5	2	24087	1.983	0.023683	MTRNR2L8
GGE	ENSG00000162994	2	55401927	55459699	114	15	24799	1.9826	0.023703	CLHC1
GGE	ENSG00000103599	15	67547138	67794598	286	19	24902	1.9824	0.023716	IQCH
GGE	ENSG00000260916	15	55632230	55700708	197	17	24574	1.9819	0.023746	CCPG1
GGE	ENSG00000122877	10	64571756	64679660	299	30	24870	1.9816	0.023764	EGR2
GGE	ENSG00000147647	8	105342552	105479281	304	43	24748	1.9811	0.023787	DPYS
GGE	ENSG00000111596	12	70636774	70748773	231	19	24852	1.9811	0.023792	CNOT2
GGE	ENSG00000162236	11	62574369	62599560	29	2	24976	1.9808	0.023808	STX5
GGE	ENSG00000167874	17	7758383	7759417	1	1	24382	1.9804	0.02383	TMEM88
GGE	ENSG00000124701	6	41021043	41032250	22	3	24736	1.9799	0.023857	APOBEC2
GGE	ENSG00000110497	11	46417964	46615675	83	6	24850	1.9796	0.023874	AMBRA1
GGE	ENSG00000170801	4	8271492	8308838	23	2	24722	1.9787	0.023922	HTRA3
GGE	ENSG00000040199	16	71671738	71758604	122	14	24856	1.9786	0.023932	PHLPP2
GGE	ENSG00000196584	7	152341864	152373250	27	5	24335	1.9783	0.023945	XRCC2
GGE	ENSG00000118491	6	144185573	144259483	119	19	24643	1.9773	0.024005	ZC2HC1B
GGE	ENSG00000099785	19	8478154	8503901	19	5	24359	1.9768	0.024035	2002-03-01
GGE	ENSG00000101440	20	32782375	32857150	76	6	24732	1.9748	0.024148	ASIP
GGE	ENSG00000101596	18	2655737	2805015	327	17	24837	1.9743	0.024177	SMCHD1
GGE	ENSG00000167272	12	121016567	121019201	9	3	24783	1.9741	0.024187	POP5
GGE	ENSG00000181013	17	56618948	56621729	5	2	24990	1.974	0.024193	C17orf47
GGE	ENSG00000119866	2	60678302	60780702	90	17	24590	1.9733	0.024232	BCL11A
GGE	ENSG00000173988	13	46786083	46851501	140	14	24623	1.973	0.024246	LRRC63
GGE	ENSG00000197497	19	53662466	53696639	42	3	24433	1.9714	0.024337	ZNF665
GGE	ENSG00000204682	10	21781587	21786191	2	1	24876	1.9706	0.024385	CASC10
GGE	ENSG00000189403	13	31032884	31191734	68	16	24531	1.9704	0.024394	HMGB1
GGE	ENSG00000197182	22	46449749	46509808	53	7	24381	1.9704	0.024396	FLJ27365
GGE	ENSG00000253731	5	140753651	140892546	273	30	24715	1.97	0.02442	PCDHGA6
GGE	ENSG00000197566	17	16524051	16557170	58	4	24918	1.9699	0.024423	ZNF624
GGE	ENSG00000014641	2	63815743	63834331	25	3	24897	1.9698	0.02443	MDH1
GGE	ENSG00000173715	11	66511922	66610987	48	8	24730	1.9687	0.024495	C11orf80
GGE	ENSG00000256061	15	55702723	55800432	250	26	24588	1.9679	0.024542	DYX1C1
GGE	ENSG00000123179	13	50234859	50265611	125	17	24761	1.9678	0.024548	EBPL
GGE	ENSG00000113368	5	126112315	126172712	129	16	24804	1.9666	0.024614	LMNB1
GGE	ENSG00000142025	19	42348806	42356401	2	1	24442	1.9665	0.024619	DMRTC2
GGE	ENSG00000119509	9	102861538	103063282	351	14	24627	1.9646	0.024732	INVS
GGE	ENSG00000131044	20	30458505	30532764	104	17	24662	1.9642	0.024751	TTLL9
GGE	ENSG00000173480	19	58411664	58427978	25	4	24407	1.9639	0.024769	ZNF417
GGE	ENSG00000205639	2	24232951	24286191	100	17	24738	1.9638	0.024774	MFSD2B
GGE	ENSG00000170956	19	42300369	42315591	15	1	24581	1.9633	0.024803	CEACAM3
GGE	ENSG00000092850	1	36549676	36553876	2	1	24849	1.9631	0.024816	TEKT2
GGE	ENSG00000213096	19	24216276	24312654	247	10	24552	1.9626	0.024846	ZNF254
GGE	ENSG00000198099	4	100044808	100078949	183	8	24862	1.9623	0.024862	ADH4
GGE	ENSG00000253910	5	140739703	140892546	291	32	24708	1.9623	0.024863	PCDHGB2
GGE	ENSG00000262576	5	140734768	140892546	301	33	24706	1.9618	0.024893	PCDHGA4
GGE	ENSG00000254221	5	140729828	140892546	306	33	24696	1.9612	0.024929	PCDHGB1
GGE	ENSG00000086548	19	42254885	42276113	25	5	24340	1.9608	0.024949	CEACAM6
GGE	ENSG00000148734	10	72007085	72043432	92	18	24668	1.9608	0.024953	NPFFR1
GGE	ENSG00000003249	16	90071273	90086536	30	6	24621	1.9602	0.024984	DBNDD1
GGE	ENSG00000140937	16	64977656	65160015	325	30	24775	1.9599	0.025004	CDH11
GGE	ENSG00000183726	1	25664408	25688852	11	2	24629	1.9599	0.025006	TMEM50A
GGE	ENSG00000132510	17	7743222	7758114	11	3	24375	1.9598	0.025007	KDM6B
GGE	ENSG00000129028	15	71173681	71185124	2	1	24770	1.9598	0.025009	THAP10
GGE	ENSG00000105993	7	157128075	157210133	121	7	24656	1.9592	0.025045	DNAJB6
GGE	ENSG00000204536	6	31110216	31126015	94	17	24801	1.9591	0.025053	CCHCR1
GGE	ENSG00000131848	19	56732681	56879752	109	20	24397	1.9573	0.025157	ZSCAN5A
GGE	ENSG00000138041	2	55774428	55846015	179	20	24732	1.9558	0.025243	SMEK2
GGE	ENSG00000087884	11	77532155	77629478	129	10	24902	1.9551	0.025287	AAMDC
GGE	ENSG00000131149	16	85645015	85709810	3	1	24599	1.9548	0.025306	GSE1
GGE	ENSG00000074966	4	48068410	48136273	127	17	24817	1.954	0.025349	TXK
GGE	ENSG00000163590	3	160473390	160796695	588	46	24751	1.954	0.025353	PPM1L
GGE	ENSG00000259207	17	45331212	45421658	246	28	24736	1.9528	0.025423	ITGB3
GGE	ENSG00000259753	17	45331263	45421658	246	28	24736	1.9528	0.025423	ITGB3
GGE	ENSG00000204956	5	140710252	140892546	331	36	24700	1.9523	0.025448	PCDHGA1
GGE	ENSG00000176142	3	119148347	119187677	90	11	24939	1.9522	0.025458	TMEM39A
GGE	ENSG00000153982	17	57297828	57353328	68	5	24756	1.952	0.025468	GDPD1
GGE	ENSG00000146670	11	64833772	64851636	24	6	24794	1.9518	0.025482	CDCA5
GGE	ENSG00000262209	5	140749831	140892546	278	31	24710	1.9513	0.025511	PCDHGB3
GGE	ENSG00000121897	4	39460620	39479273	54	10	24685	1.9503	0.025572	LIAS
GGE	ENSG00000182093	21	40752170	40800454	72	7	24752	1.9502	0.025579	WRB
GGE	ENSG00000139636	12	49490919	49504683	6	1	24506	1.9501	0.025582	LMBR1L
GGE	ENSG00000177225	11	767220	777488	5	1	24459	1.9495	0.025616	PDDC1
GGE	ENSG00000178645	10	50887697	50918307	68	8	24762	1.9493	0.025632	C10orf53
GGE	ENSG00000254245	5	140723601	140892546	313	33	24698	1.949	0.025647	PCDHGA3
GGE	ENSG00000182103	11	82443053	82444906	6	2	24622	1.949	0.025648	FAM181B
GGE	ENSG00000198961	5	108670410	108745695	194	12	24387	1.9479	0.025715	PJA2
GGE	ENSG00000177694	3	174156363	175523428	2802	215	24685	1.9459	0.025835	NAALADL2
GGE	ENSG00000000971	1	196621008	196716634	167	11	24893	1.9455	0.025857	CFH
GGE	ENSG00000170500	2	100889753	100939195	140	12	24682	1.9446	0.025912	LONRF2
GGE	ENSG00000062370	19	44830708	44871377	87	10	24615	1.9444	0.025925	ZNF112
GGE	ENSG00000184363	11	392614	404908	8	2	24399	1.9442	0.025935	PKP3
GGE	ENSG00000179941	12	76738254	76742222	3	2	24464	1.9442	0.025938	BBS10
GGE	ENSG00000118707	20	35201891	35222353	5	2	24333	1.9436	0.025975	TGIF2
GGE	ENSG00000196839	20	43248163	43280874	24	5	24589	1.9435	0.02598	ADA
GGE	ENSG00000158869	1	161185024	161190489	11	4	24618	1.9433	0.025992	FCER1G
GGE	ENSG00000204310	6	32135989	32145873	12	5	24481	1.9431	0.026	AGPAT1
GGE	ENSG00000103742	15	65673802	65715410	37	7	24568	1.9429	0.026013	IGDCC4
GGE	ENSG00000100744	14	96829814	96853625	14	2	24668	1.9427	0.026025	GSKIP
GGE	ENSG00000151229	12	40148823	40499891	681	82	24624	1.942	0.026071	SLC2A13
GGE	ENSG00000197724	9	96338689	96441869	319	29	24827	1.9418	0.026078	PHF2
GGE	ENSG00000133884	11	65101225	65120720	11	3	24352	1.9415	0.026099	DPF2
GGE	ENSG00000227059	12	133794898	133812681	25	6	24285	1.9414	0.026106	ANHX
GGE	ENSG00000124228	20	47835884	47860614	65	8	24702	1.9411	0.026123	DDX27
GGE	ENSG00000169676	4	9783258	9785632	3	1	24652	1.9411	0.026126	DRD5
GGE	ENSG00000256223	12	133707161	133736051	56	6	24713	1.9407	0.026148	ZNF10
GGE	ENSG00000182107	14	61744088	61748558	8	4	24378	1.9392	0.026237	TMEM30B
GGE	ENSG00000081853	5	140718539	140892546	319	34	24701	1.9381	0.026308	PCDHGA2
GGE	ENSG00000175175	17	56833230	57058983	237	17	24685	1.9372	0.026359	PPM1E
GGE	ENSG00000171234	4	69917081	69978705	303	11	24891	1.9372	0.026363	UGT2B7
GGE	ENSG00000148120	9	97488983	97849441	593	36	24818	1.9359	0.026443	C9orf3
GGE	ENSG00000125952	14	65472892	65569413	162	20	24553	1.9353	0.026477	MAX
GGE	ENSG00000173207	1	154947129	154951725	1	1	24415	1.9349	0.0265	CKS1B
GGE	ENSG00000188659	15	82555151	82577271	43	10	24354	1.9345	0.026526	FAM154B
GGE	ENSG00000120278	6	150920999	151164799	495	66	24724	1.9344	0.026534	PLEKHG1
GGE	ENSG00000163050	1	227085237	227175246	133	28	24641	1.9342	0.026547	ADCK3
GGE	ENSG00000176635	22	30476163	30573064	165	19	24854	1.9335	0.026588	HORMAD2
GGE	ENSG00000168818	4	4417469	4544073	200	15	24760	1.933	0.026617	STX18
GGE	ENSG00000244607	3	42734155	42814745	123	12	24836	1.9324	0.026657	CCDC13
GGE	ENSG00000134516	5	169064251	169510386	902	110	24717	1.9319	0.026688	DOCK2
GGE	ENSG00000167881	17	74035184	74068734	36	2	24726	1.9311	0.026733	SRP68
GGE	ENSG00000205334	2	27928653	27938599	4	2	24432	1.931	0.026742	AC074091.13
GGE	ENSG00000170290	11	107578104	107590419	25	6	24770	1.9307	0.026759	SLN
GGE	ENSG00000221937	7	142919130	142920162	1	1	24381	1.9302	0.02679	TAS2R40
GGE	ENSG00000182050	12	86372516	87232681	1662	67	24600	1.9299	0.02681	MGAT4C
GGE	ENSG00000163879	1	38022520	38032458	19	3	24922	1.9298	0.026813	DNALI1
GGE	ENSG00000253485	5	140743898	140892546	287	32	24706	1.9298	0.026816	PCDHGA5
GGE	ENSG00000168569	11	62539101	62559493	13	3	24529	1.9297	0.026819	TMEM223
GGE	ENSG00000139726	12	123237321	123255611	30	4	24835	1.9296	0.026829	DENR
GGE	ENSG00000122188	1	203734304	203745361	23	4	24620	1.9292	0.026853	LAX1
GGE	ENSG00000077044	2	234263153	234380750	178	19	24777	1.9289	0.026874	DGKD
GGE	ENSG00000197927	2	132479948	132524973	11	1	24635	1.927	0.026992	C2orf27A
GGE	ENSG00000175279	1	10490159	10512210	37	4	24739	1.9268	0.027004	APITD1
GGE	ENSG00000251503	1	10490159	10512210	37	4	24739	1.9268	0.027004	APITD1-CORT
GGE	ENSG00000114126	3	141663277	141868386	562	20	24835	1.9262	0.02704	TFDP2
GGE	ENSG00000197360	19	22573821	22715287	315	37	24623	1.926	0.027049	ZNF98
GGE	ENSG00000121769	1	31838472	31849697	12	4	24797	1.9254	0.027092	FABP3
GGE	ENSG00000240386	1	152748848	152749445	1	1	24980	1.9252	0.0271	LCE1F
GGE	ENSG00000221890	22	39214457	39239987	41	4	24779	1.9248	0.027128	NPTXR
GGE	ENSG00000213064	1	168195176	168222263	20	2	24758	1.9244	0.027151	SFT2D2
GGE	ENSG00000084234	11	129939732	130014699	173	12	24829	1.9229	0.027244	APLP2
GGE	ENSG00000101166	20	57608200	57617964	10	3	24545	1.9225	0.027272	SLMO2
GGE	ENSG00000130720	9	133777825	133814673	47	6	24516	1.9224	0.027276	FIBCD1
GGE	ENSG00000106415	7	8008425	8133902	270	22	24709	1.9214	0.02734	GLCCI1
GGE	ENSG00000256162	6	131148546	131158275	34	7	24765	1.9213	0.027346	SMLR1
GGE	ENSG00000125633	2	118673054	118771709	241	22	24846	1.9211	0.02736	CCDC93
GGE	ENSG00000198586	2	171847333	172087824	356	17	24817	1.921	0.027367	TLK1
GGE	ENSG00000023330	3	52232102	52248343	10	1	24809	1.9205	0.0274	ALAS1
GGE	ENSG00000116663	1	11724181	11734411	1	1	24153	1.9203	0.02741	FBXO6
GGE	ENSG00000116106	2	222282747	222438922	301	38	24778	1.9176	0.027579	EPHA4
GGE	ENSG00000106976	9	130965658	131017527	69	11	24581	1.9165	0.02765	DNM1
GGE	ENSG00000124067	16	67977377	68003504	14	3	24785	1.9165	0.027652	SLC12A4
GGE	ENSG00000163659	3	156391024	156424559	50	8	24531	1.9162	0.027668	TIPARP
GGE	ENSG00000114054	3	135969148	136056738	97	14	24635	1.9158	0.027693	PCCB
GGE	ENSG00000136874	9	102668915	102732618	84	5	24855	1.9158	0.027694	STX17
GGE	ENSG00000069849	3	141594966	141645356	139	13	24804	1.9158	0.027696	ATP1B3
GGE	ENSG00000096872	9	26947037	27062928	227	19	24787	1.9152	0.027732	IFT74
GGE	ENSG00000163463	1	155141884	155145951	1	1	24136	1.9151	0.02774	KRTCAP2
GGE	ENSG00000089558	17	40308909	40333296	12	2	24713	1.9143	0.027789	KCNH4
GGE	ENSG00000095739	10	28966271	28971868	5	2	24564	1.9137	0.027832	BAMBI
GGE	ENSG00000103037	16	58549383	58554431	12	3	24862	1.9133	0.027852	SETD6
GGE	ENSG00000186867	4	122250467	122302214	158	19	24685	1.9133	0.027853	QRFPR
GGE	ENSG00000133216	1	23037332	23241818	245	35	24681	1.9128	0.027884	EPHB2
GGE	ENSG00000232859	17	26205340	26221778	6	2	24676	1.9127	0.027892	LYRM9
GGE	ENSG00000166006	12	75433857	75603648	268	33	24774	1.9116	0.027965	KCNC2
GGE	ENSG00000087157	17	76374721	76421195	95	8	24711	1.9104	0.02804	PGS1
GGE	ENSG00000136068	3	57994127	58157982	265	26	24773	1.9101	0.028063	FLNB
GGE	ENSG00000113088	5	54320081	54330398	13	3	24668	1.91	0.028064	GZMK
GGE	ENSG00000072849	17	5374571	5390131	35	8	24703	1.9093	0.028111	DERL2
GGE	ENSG00000116685	1	11979648	11986485	16	5	24615	1.9092	0.028116	KIAA2013
GGE	ENSG00000087586	20	54944445	54967393	7	3	24463	1.9088	0.028144	AURKA
GGE	ENSG00000103415	16	4524691	4560348	37	2	24791	1.9087	0.028153	HMOX2
GGE	ENSG00000166133	15	40861499	40866659	9	3	24757	1.9084	0.028171	RPUSD2
GGE	ENSG00000146918	7	158424003	158497520	133	10	24865	1.908	0.028193	NCAPG2
GGE	ENSG00000137573	8	70378859	70573150	244	47	24630	1.9072	0.02825	SULF1
GGE	ENSG00000112812	6	27215480	27224403	16	6	24549	1.9071	0.028254	PRSS16
GGE	ENSG00000144381	2	198351305	198381461	16	2	24981	1.9069	0.028269	HSPD1
GGE	ENSG00000075886	2	132233666	132240507	15	1	24744	1.9063	0.028304	TUBA3D
GGE	ENSG00000166797	15	64364758	64386217	18	4	24403	1.9063	0.028309	FAM96A
GGE	ENSG00000179144	7	150211918	150218161	10	2	24744	1.9062	0.028314	GIMAP7
GGE	ENSG00000146433	6	158957468	159056460	201	14	24807	1.9056	0.028351	TMEM181
GGE	ENSG00000069011	5	134363425	134370503	19	2	24890	1.9052	0.028374	PITX1
GGE	ENSG00000178028	1	44679127	44686353	7	3	24850	1.9045	0.028423	DMAP1
GGE	ENSG00000168496	11	61560109	61564716	2	1	23990	1.9039	0.028464	FEN1
GGE	ENSG00000019102	11	124617368	124622134	7	2	24405	1.9039	0.028464	VSIG2
GGE	ENSG00000203740	1	170115142	170136931	50	9	24517	1.9037	0.028477	METTL11B
GGE	ENSG00000178917	3	44540462	44552128	6	2	24962	1.9036	0.028478	ZNF852
GGE	ENSG00000128694	2	190611386	190627953	13	4	24767	1.9034	0.028492	OSGEPL1
GGE	ENSG00000184900	21	46225532	46238694	33	8	24645	1.9031	0.028511	SUMO3
GGE	ENSG00000139269	12	57846106	57853063	5	2	24315	1.9031	0.028513	INHBE
GGE	ENSG00000090612	12	133707570	133783698	155	10	24805	1.9024	0.028558	ZNF268
GGE	ENSG00000123064	12	113594979	113623284	3	2	24449	1.9018	0.028601	DDX54
GGE	ENSG00000105186	19	33087913	33167503	295	23	24509	1.9016	0.028611	ANKRD27
GGE	ENSG00000197993	7	142638201	142659768	13	3	24537	1.9011	0.028647	KEL
GGE	ENSG00000085063	11	33719807	33757991	71	13	24537	1.9005	0.028687	CD59
GGE	ENSG00000140199	15	34525460	34630261	237	17	24698	1.8996	0.028743	SLC12A6
GGE	ENSG00000183921	16	22177618	22203075	19	4	24599	1.8995	0.028752	SDR42E2
GGE	ENSG00000157315	16	69377151	69385712	10	4	24610	1.8993	0.028763	TMED6
GGE	ENSG00000103174	16	5074845	5084142	17	5	24543	1.8993	0.028765	NAGPA
GGE	ENSG00000124116	20	44376583	44420571	142	12	24717	1.8986	0.028808	WFDC3
GGE	ENSG00000115355	2	55514978	55647057	319	18	24828	1.8979	0.028854	CCDC88A
GGE	ENSG00000171862	10	89622870	89731687	83	17	24364	1.8976	0.028874	PTEN
GGE	ENSG00000184402	20	60718822	60757540	123	9	24702	1.8964	0.028951	SS18L1
GGE	ENSG00000204406	2	148778580	149275805	679	60	24783	1.8955	0.029012	MBD5
GGE	ENSG00000105697	19	35771619	35776046	8	3	24564	1.8955	0.029012	HAMP
GGE	ENSG00000151470	4	130014472	130037795	64	7	24902	1.8955	0.029013	C4orf33
GGE	ENSG00000136490	17	61773262	61778532	2	1	24905	1.8955	0.029016	LIMD2
GGE	ENSG00000103769	15	66018392	66184329	241	16	24829	1.8952	0.029031	RAB11A
GGE	ENSG00000159592	1	46092976	46153785	88	3	24947	1.8951	0.029036	GPBP1L1
GGE	ENSG00000130724	19	59062933	59066491	4	2	24515	1.895	0.029047	CHMP2A
GGE	ENSG00000105610	19	12995237	12997995	2	1	24304	1.8948	0.029061	KLF1
GGE	ENSG00000106348	7	128032331	128050306	32	8	24511	1.8937	0.029135	IMPDH1
GGE	ENSG00000149503	11	61891445	61920635	102	9	24812	1.8936	0.029136	INCENP
GGE	ENSG00000108578	17	28575218	28619074	44	6	24842	1.8933	0.029158	BLMH
GGE	ENSG00000184486	6	99282580	99286660	4	2	24507	1.8931	0.029173	POU3F2
GGE	ENSG00000010626	12	6982733	7023407	7	2	24617	1.8927	0.029201	LRRC23
GGE	ENSG00000197429	1	46159996	46216322	75	3	24917	1.8925	0.029215	IPP
GGE	ENSG00000125900	20	1514897	1539489	63	10	24865	1.8917	0.029265	SIRPD
GGE	ENSG00000196542	3	161062580	161090668	103	17	24503	1.8907	0.02933	SPTSSB
GGE	ENSG00000088986	12	120907653	120936296	69	11	24754	1.8907	0.02933	DYNLL1
GGE	ENSG00000078814	20	33563206	33590240	41	7	24918	1.8905	0.029348	MYH7B
GGE	ENSG00000171723	14	66974125	67648520	1716	35	24181	1.89	0.029382	GPHN
GGE	ENSG00000117000	1	40627045	40706593	63	10	24792	1.8898	0.029394	RLF
GGE	ENSG00000114013	3	121774213	121839983	101	21	24539	1.8888	0.029457	CD86
GGE	ENSG00000198874	7	66460160	66704501	845	22	24631	1.8888	0.029459	TYW1
GGE	ENSG00000160285	21	47608055	47648738	99	12	24777	1.8886	0.029472	LSS
GGE	ENSG00000183251	11	5322244	5323226	1	1	24530	1.8879	0.02952	OR51B4
GGE	ENSG00000170634	2	54197975	54532437	751	63	24712	1.8876	0.02954	ACYP2
GGE	ENSG00000196724	19	58433252	58446761	18	4	24571	1.887	0.029579	ZNF418
GGE	ENSG00000127914	7	91570181	91739987	231	6	24924	1.8868	0.029593	AKAP9
GGE	ENSG00000144214	2	99900701	99921205	26	5	24566	1.8862	0.029636	LYG1
GGE	ENSG00000175115	11	65837834	66012218	218	15	24882	1.8858	0.029661	PACS1
GGE	ENSG00000140832	16	71660064	71676017	22	6	24858	1.8856	0.029676	MARVELD3
GGE	ENSG00000255526	14	24683161	24701558	9	3	24585	1.8855	0.029682	NEDD8-MDP1
GGE	ENSG00000172209	7	107110463	107116098	5	2	24969	1.8848	0.029729	GPR22
GGE	ENSG00000011566	2	39476407	39664453	302	19	24772	1.8842	0.029769	MAP4K3
GGE	ENSG00000174059	1	208057594	208084747	53	11	24639	1.8841	0.029778	CD34
GGE	ENSG00000087266	4	2794750	2842825	73	9	24549	1.884	0.029785	SH3BP2
GGE	ENSG00000168246	5	171636644	171711075	151	5	24908	1.8837	0.029804	UBTD2
GGE	ENSG00000088298	20	33703167	33865928	282	27	24752	1.8832	0.029838	EDEM2
GGE	ENSG00000175334	11	65769550	65771620	7	3	24722	1.883	0.029853	BANF1
GGE	ENSG00000116560	1	35641979	35658749	19	1	24834	1.8828	0.029861	SFPQ
GGE	ENSG00000120256	6	150139934	150186199	55	5	24794	1.8827	0.02987	LRP11
GGE	ENSG00000140319	15	40327940	40331389	8	3	24484	1.8826	0.029879	SRP14
GGE	ENSG00000152128	2	135213330	135476570	290	35	24771	1.8812	0.029974	TMEM163
GGE	ENSG00000146066	5	175815748	175816772	3	1	24836	1.8811	0.029981	HIGD2A
GGE	ENSG00000128944	15	40674922	40686447	22	3	24959	1.8811	0.029981	KNSTRN
GGE	ENSG00000261190	16	52039399	52112386	93	10	24660	1.8806	0.030012	C16orf97
GGE	ENSG00000149262	11	77589766	77705724	206	15	24875	1.8803	0.030037	INTS4
GGE	ENSG00000179088	12	103631369	103889749	411	32	24857	1.8802	0.030042	C12orf42
GGE	ENSG00000122873	10	60028818	60049346	48	4	24800	1.8799	0.030058	CISD1
GGE	ENSG00000101307	20	1544167	1600707	33	7	24771	1.8799	0.03006	SIRPB1
GGE	ENSG00000269343	19	58331099	58370018	57	8	24451	1.8791	0.030115	ZNF587B
GGE	ENSG00000171786	1	160336857	160342638	10	3	24691	1.8789	0.030132	NHLH1
GGE	ENSG00000091136	7	107564244	107643700	82	13	24720	1.8788	0.030137	LAMB1
GGE	ENSG00000067606	1	1981909	2116834	134	9	24766	1.8787	0.030141	PRKCZ
GGE	ENSG00000186919	17	74068042	74079747	4	1	24710	1.8786	0.030149	ZACN
GGE	ENSG00000149651	20	44350990	44354469	16	2	24873	1.8779	0.0302	SPINT4
GGE	ENSG00000109670	4	153242410	153457253	49	2	24735	1.8778	0.030201	FBXW7
GGE	ENSG00000112200	6	56951642	57035105	71	5	24931	1.8778	0.030207	ZNF451
GGE	ENSG00000260238	1	156182773	156213123	46	5	24720	1.8768	0.030275	PMF1-BGLAP
GGE	ENSG00000160783	1	156182784	156212874	46	5	24720	1.8768	0.030275	PMF1
GGE	ENSG00000110148	11	6280966	6293357	6	1	24653	1.8756	0.030356	CCKBR
GGE	ENSG00000116151	1	2252692	2323146	83	12	24710	1.8745	0.030428	MORN1
GGE	ENSG00000005175	12	48057070	48099844	49	8	24906	1.8743	0.030445	RPAP3
GGE	ENSG00000166169	10	103338639	103348027	13	2	24973	1.8742	0.030449	POLL
GGE	ENSG00000164816	8	6912831	6914256	1	1	24583	1.8742	0.03045	DEFA5
GGE	ENSG00000136040	12	94542499	94701451	379	62	24738	1.8735	0.030498	PLXNC1
GGE	ENSG00000187416	7	103969104	104549001	1230	131	24752	1.8727	0.030552	LHFPL3
GGE	ENSG00000181027	19	47249303	47280245	40	7	24263	1.872	0.030604	FKRP
GGE	ENSG00000248919	7	99017372	99063820	67	9	24761	1.8719	0.030613	ATP5J2-PTCD1
GGE	ENSG00000174099	12	65672423	65882024	231	18	24695	1.8718	0.030616	MSRB3
GGE	ENSG00000213865	8	67579850	67597799	3	1	24807	1.8715	0.030641	C8orf44
GGE	ENSG00000225921	6	13615559	13632971	11	2	24728	1.8711	0.030665	NOL7
GGE	ENSG00000142207	21	33683329	33765335	131	7	24893	1.8707	0.030693	URB1
GGE	ENSG00000120314	5	140044261	140053709	14	3	24875	1.8702	0.030728	WDR55
GGE	ENSG00000106066	7	29034847	29235067	418	59	24690	1.8702	0.03073	CPVL
GGE	ENSG00000130787	12	123319000	123347507	62	5	24863	1.8702	0.030731	HIP1R
GGE	ENSG00000135912	2	219575568	219620139	71	3	24869	1.87	0.030745	TTLL4
GGE	ENSG00000198231	17	61850963	61896677	68	5	24952	1.8696	0.030767	DDX42
GGE	ENSG00000145864	5	160715436	160976050	491	54	24512	1.8693	0.030792	GABRB2
GGE	ENSG00000165757	10	30301729	30404423	121	23	24712	1.8681	0.030875	KIAA1462
GGE	ENSG00000197444	10	50942689	50970425	49	6	24762	1.868	0.030884	OGDHL
GGE	ENSG00000117399	1	43824626	43828874	3	2	24779	1.8673	0.030929	CDC20
GGE	ENSG00000159596	1	46152886	46160115	11	1	24993	1.8669	0.030959	TMEM69
GGE	ENSG00000100347	22	44351301	44406411	136	15	24753	1.8648	0.031104	SAMM50
GGE	ENSG00000166479	18	66340925	66382535	56	6	24473	1.8642	0.031148	TMX3
GGE	ENSG00000129696	8	33330904	33371119	104	9	24495	1.8641	0.031157	TTI2
GGE	ENSG00000105738	19	38397868	38699012	584	50	24625	1.8628	0.031243	SIPA1L3
GGE	ENSG00000171595	17	72270386	72311023	84	10	24514	1.8612	0.031359	DNAI2
GGE	ENSG00000180530	21	16333556	16437321	131	18	24772	1.8611	0.031366	NRIP1
GGE	ENSG00000084073	1	40723779	40759856	26	5	24865	1.8608	0.031383	ZMPSTE24
GGE	ENSG00000069966	15	52413117	52483566	150	17	24607	1.8608	0.031389	GNB5
GGE	ENSG00000177700	11	837356	842545	22	1	24530	1.8605	0.031407	POLR2L
GGE	ENSG00000144036	2	72403113	73053170	683	22	24772	1.8598	0.031456	EXOC6B
GGE	ENSG00000162722	1	248020501	248041507	41	6	24576	1.8587	0.031532	TRIM58
GGE	ENSG00000177697	11	832843	839831	24	1	24351	1.8585	0.031547	CD151
GGE	ENSG00000180098	1	28879597	28905051	20	2	24661	1.8581	0.031575	TRNAU1AP
GGE	ENSG00000151502	11	134094539	134117686	22	5	24636	1.8578	0.031599	VPS26B
GGE	ENSG00000227868	1	23337327	23342343	4	1	24835	1.8578	0.0316	C1orf234
GGE	ENSG00000103642	15	63413999	63434260	40	5	24893	1.8577	0.031602	LACTB
GGE	ENSG00000175520	11	5528530	5531215	1	1	24942	1.856	0.03173	UBQLN3
GGE	ENSG00000178163	4	10441498	10459034	24	7	24514	1.8559	0.031734	ZNF518B
GGE	ENSG00000142794	1	21766621	21811498	91	9	24373	1.8552	0.031782	NBPF3
GGE	ENSG00000189410	1	21046225	21059330	28	6	24449	1.8541	0.031865	SH2D5
GGE	ENSG00000262633	17	45000499	45124520	281	25	24680	1.8539	0.03188	RP11-156P1.2
GGE	ENSG00000140548	15	90544624	90625438	51	7	24517	1.8538	0.031885	ZNF710
GGE	ENSG00000135045	9	77561497	77567802	8	3	24596	1.8537	0.031893	C9orf40
GGE	ENSG00000138668	4	83273651	83295656	35	4	24748	1.8535	0.031902	HNRNPD
GGE	ENSG00000167554	19	52839498	52871031	35	9	24260	1.8535	0.031902	ZNF610
GGE	ENSG00000156564	6	40359325	40555204	540	54	24627	1.8534	0.03191	LRFN2
GGE	ENSG00000116745	1	68894505	68915642	48	8	24835	1.8533	0.031921	RPE65
GGE	ENSG00000188672	1	25688740	25756683	39	2	24528	1.8523	0.03199	RHCE
GGE	ENSG00000105672	19	36132647	36135773	2	1	24514	1.8522	0.031995	ETV2
GGE	ENSG00000062524	15	41795836	41806085	14	4	24563	1.8522	0.032	LTK
GGE	ENSG00000025708	22	50964181	50968485	4	1	24542	1.8519	0.032017	TYMP
GGE	ENSG00000184545	11	1575274	1593150	46	4	24636	1.8516	0.032042	DUSP8
GGE	ENSG00000139921	14	51706880	51722759	28	6	24883	1.8509	0.032089	TMX1
GGE	ENSG00000010017	6	13621730	13711796	69	8	24765	1.8507	0.032105	RANBP9
GGE	ENSG00000162928	2	61244360	61279125	36	8	24789	1.8506	0.032112	PEX13
GGE	ENSG00000168071	11	64107695	64125006	24	6	24566	1.8504	0.032126	CCDC88B
GGE	ENSG00000110888	12	30862486	30907885	102	10	24860	1.8501	0.032148	CAPRIN2
GGE	ENSG00000132330	2	238969530	239008054	94	10	24814	1.8497	0.03218	SCLY
GGE	ENSG00000214944	5	72921983	73237818	621	78	24602	1.8495	0.032189	ARHGEF28
GGE	ENSG00000079387	12	48436681	48500091	137	13	24832	1.8494	0.032198	SENP1
GGE	ENSG00000187123	2	150186499	150330662	202	18	24756	1.8493	0.032211	LYPD6
GGE	ENSG00000213380	16	69354043	69373570	38	6	24829	1.8491	0.032219	COG8
GGE	ENSG00000101160	20	57570240	57582302	31	6	24489	1.8491	0.032221	CTSZ
GGE	ENSG00000183273	12	119772517	119978852	377	56	24779	1.8489	0.032233	CCDC60
GGE	ENSG00000170191	20	25593571	25604811	25	4	24980	1.8487	0.032251	NANP
GGE	ENSG00000171617	5	73923234	73937249	18	3	24626	1.8487	0.032252	ENC1
GGE	ENSG00000132297	8	133073733	133123406	149	23	24758	1.8471	0.032365	HHLA1
GGE	ENSG00000036257	2	225334867	225450110	228	11	24883	1.8471	0.032368	CUL3
GGE	ENSG00000143257	1	161199456	161208092	16	4	24870	1.8464	0.032416	NR1I3
GGE	ENSG00000089916	14	76618259	76720685	290	23	24463	1.8463	0.032423	GPATCH2L
GGE	ENSG00000135362	11	36317838	36486754	361	51	24678	1.846	0.032449	PRR5L
GGE	ENSG00000115368	2	190306159	190340291	156	6	24780	1.8459	0.032455	WDR75
[truncated: 14,374 more rows]
