# Supplementary material for: GWAS meta-analysis of over 29,000 people with epilepsy identifies 26 risk loci and subtype-specific genetic architecture
Source: Nat Genet. 2023 Aug 31;55(9):1471–82. doi: 10.1038/s41588-023-01485-w (PMC10484785; doi:10.1038/s41588-023-01485-w)
Supplement: Supplementary file 9 — Scores of biological prioritization criteria for each mapped gene, of each genome-wide significant locus. [file 41588_2023_1485_MOESM9_ESM.xlsx]

## Sheet: All epilepsy
Supplementary Data 7. Scores of biological prioritization criteria for each mapped gene, of each genome-wide significant locus
Phenotype: epilepsy phenotype Locus: genomic locus Novel/replication Lead SNP (A1:A2): rsID of the lead SNP in the locus Freq1: frequency of Allele 1 (A1) Z-score: Z-score of the GWAS association test P-value: P-value of the GWAS association test Ensembl_geneid: Ensembl gene ID Gene: Gene name chr: chromosome start: start position of the gene on the chromosome end: end position of the gene on the…
Phenotype	Locus	Novel/replication	Lead SNP (A1:A2)	Freq1	Z-score	P-value	Ensembl_geneid	Gene	chr	start	end	Total	Missense	TWAS	SMR	MAGMA	PoPS	Brain expression	Knockout mouse	Monogenic epilepsy gene	Target of AED	brain-coX
All epilepsy	2p16.1	Replication	rs13032423 (A:G)	0.53	-7.04	1.85e-12	ENSG00000028116	VRK2	2	58134786	58387055	1				1								Missense: based on FUMA exonic and SNPdb missense variance status
							ENSG00000115392	FANCL	2	58386378	58468507	2		1		1								TWAS: based on FUSION PEC TWAS for 127 genes with expression information; significance at p<0.05/28=0.0018
							ENSG00000119866	BCL11A	2	60678302	60780702	5					1	1	1	1		1		SMR: based on MetaBrain for 90 genes with expression information; significance at p<0.05/12=0.004
All epilepsy	2q24.3	Replication	rs59237858 (T:C)	0.23	-6.89	5.746e-12	ENSG00000082438	COBLL1	2	165510134	165700189	0												MAGMA: gene-based MAGMA; significance at p<0.05/41 genes=0.0012
							ENSG00000153253	SCN3A	2	165944032	166060577	4						1	1	1	1			PoPS: highest Polygenic Priority Score (PoPS) score in the locus.
							ENSG00000136531	SCN2A	2	166095912	166248818	5						1	1	1	1	1		Brain expression: calculated mean TPM for brain and non-brain tissues based on GTEx v8 data and assessed if average brain tissue expression was higher than non-brain tissues. GTEx_Analysis_2017-06-05_v8_RNASeQCv1.1.9_gene_median_tpm.gct.gz
							ENSG00000178662	CSRNP3	2	166326157	166545917	2						1				1		Knockout mouse: HMD_HumanPhenotype.rpt containing the terms MP:0003631 or MP:0005386
							ENSG00000115339	GALNT3	2	166604101	166651192	0												Monogenic epilepsy gene: the gene is listed in a curated list of monogenic epilepsy genes.
							ENSG00000123607	TTC21B	2	166713985	166810353	3		1		1			1					Target of AED: the gene is a known target of an anti-epileptic drug, as assessed in DGidb.com and Rodriguez-Acevedo et al., 2021
							ENSG00000144285	SCN1A	2	166845670	166984523	8	1			1	1	1	1	1	1	1		brain-coX: prioritised as co-expressed with established epilepsy genes in >1/3 of resources tested
							ENSG00000169432	SCN9A	2	167051695	167232503	3				1			1		1
							ENSG00000136546	SCN7A	2	167260083	167350757	2									1	1
All epilepsy	10q24.32	Novel	rs3740422 (C:G)	0.33	6.04	1.517e-09	ENSG00000186862	PDZD7	10	102767440	102790890	2						1	1
							ENSG00000107819	SFXN3	10	102790991	102800998	2						1				1
							ENSG00000107821	KAZALD1	10	102821598	102827888	0
							ENSG00000236311	TLX1NB	10	102849078	102890883	0
							ENSG00000107807	TLX1	10	102889257	102897545	1										1
							ENSG00000138136	LBX1	10	102986733	102989551	2						1	1
							ENSG00000166167	BTRC	10	103113820	103317078	2						1				1
							ENSG00000166171	DPCD	10	103330317	103369425	2							1			1
							ENSG00000166169	POLL	10	103338639	103348027	0
							ENSG00000107829	FBXW4	10	103370423	103455052	1						1
							ENSG00000107831	FGF8	10	103529899	103535854	2						1	1
							ENSG00000107833	NPM3	10	103541082	103543170	2			1	1
							ENSG00000198408	MGEA5	10	103544200	103578696	2				1	1
							ENSG00000120049	KCNIP2	10	103585731	103603677	3				1		1				1
							ENSG00000120029	C10orf76	10	103605356	103815950	1				1
							ENSG00000166189	HPS6	10	103825147	103827792	2		1					1
							ENSG00000198728	LDB1	10	103867317	103880210	1							1
							ENSG00000148840	PPRC1	10	103892787	103910082	0
							ENSG00000166197	NOLC1	10	103911933	103923627	1							1
							ENSG00000119915	ELOVL3	10	103986085	103989346	0
							ENSG00000107859	PITX3	10	103989943	104001231	2							1			1
							ENSG00000107862	GBF1	10	104005289	104142656	0
							ENSG00000059915	PSD	10	104162376	104181296	2						1				1
							ENSG00000107872	FBXL15	10	104178946	104182893	2						1				1
							ENSG00000107874	CUEDC2	10	104183002	104192418	0
							ENSG00000138111	TMEM180	10	104221149	104236802	1										1
							ENSG00000138107	ACTR1A	10	104238986	104262482	0
							ENSG00000107882	SUFU	10	104263744	104393292	1							1
							ENSG00000166275	C10orf32	10	104613980	104624718	0
							ENSG00000214435	AS3MT	10	104629273	104661656	0
							Locus with no mapped genes within 250kb, eQTL or HiC; chosen genes within 500kb
All epilepsy	9q21.13	Novel	rs4744696 (A:G)	0.82	-5.74	9.694e-09	ENSG00000198963	RORB	9	77112251	77308093	4					1	1	1			1

## Sheet: Generalised epilepsy
Supplementary Data 7. Scores of biological prioritization criteria for each mapped gene, of each genome-wide significant locus
Phenotype: epilepsy phenotype Locus: genomic locus Novel/replication Lead SNP (A1:A2): rsID of the lead SNP in the locus Freq1: frequency of Allele 1 (A1) Z-score: Z-score of the GWAS association test P-value: P-value of the GWAS association test Ensembl_geneid: Ensembl gene ID Gene: Gene name chr: chromosome start: start position of the gene on the chromosome end: end position of the gene on the…
Phenotype	Locus	Novel/replication	Lead SNP (A1:A2)	Freq1	Z-score	P-value	Ensembl_geneid	Gene	chr	start	end	Total	Missense	TWAS	SMR	MAGMA	PoPS	Brain expression	Knockout mouse	Monogenic epilepsy gene	Target of AED	brain-coX
Generalised epilepsy	1q43	Novel	rs876793 (T:C)	0.67	-5.95	2.644e-09	ENSG00000156876	SASS6	1	100549119	100598511	0													Missense: based on FUMA exonic and SNPdb missense variance status
							ENSG00000168159	RNF187	1	228674762	228683467	2						1				1			TWAS: based on FUSION PEC TWAS for 127 genes with expression information; significance at p<0.05/127=4e-4
							ENSG00000198626	RYR2	1	237205505	237997288	4					1	1	1			1			SMR: based on MetaBrain for 90 genes with expression information; significance at p<0.05/90=5.5e-4
							ENSG00000116996	ZP4	1	238045705	238054094	0													MAGMA: gene-based MAGMA; significance at p<0.05/240 genes=2.1e-4
							ENSG00000270188	MTRNR2L11	1	238107024	238108575	1						1							PoPS: highest Polygenic Priority Score (PoPS) score in the locus.
							ENSG00000133019	CHRM3	1	239549865	240078750	4						1	1		1	1			Brain expression: calculated mean TPM for brain and non-brain tissues based on GTEx v8 data and assessed if average brain tissue expression was higher than non-brain tissues. GTEx_Analysis_2017-06-05_v8_RNASeQCv1.1.9_gene_median_tpm.gct.gz
Generalised epilepsy	2p16.1	Replication	rs11688767 (A:T)	0.53	9.38	6.58e-21	ENSG00000028116	VRK2	2	58134786	58387055	2	1			1									Monogenic epilepsy gene: the gene is listed in a curated list of monogenic epilepsy genes.
							ENSG00000115392	FANCL	2	58386378	58468507	2		1		1									Knockout mouse: HMD_HumanPhenotype.rpt containing the terms MP:0003631 or MP:0005386
							ENSG00000119866	BCL11A	2	60678302	60780702	5					1	1	1	1		1			brain-coX: prioritised as co-expressed with established epilepsy genes in >1/3 of resources tested
Generalised epilepsy	2q12.1	Novel	rs62151809 (T:C)	0.43	6.77	1.277e-11	ENSG00000135953	MFSD9	2	103332299	103353347	0
							ENSG00000198914	POU3F3	2	105471969	105476929	3					1	1	1
Generalised epilepsy	2q24.3	Replication	rs11890028 (T:G)	0.72	5.63	1.728e-08	ENSG00000136531	SCN2A	2	166095912	166248818	5						1	1	1	1	1
							ENSG00000115339	GALNT3	2	166604101	166651192	0
							ENSG00000123607	TTC21B	2	166713985	166810353	2		1					1
							ENSG00000144285	SCN1A	2	166845670	166984523	8	1			1	1	1	1	1	1	1
							ENSG00000169432	SCN9A	2	167051695	167232503	3							1		1	1
Generalised epilepsy	2q32.2	Replication	rs6721964 (A:G)	0.66	-6.18	6.542e-10	ENSG00000138381	ASNSD1	2	190526111	190535557	0
							ENSG00000198130	HIBCH	2	191054461	191208919	1							1
							ENSG00000151689	INPP1	2	191208196	191236391	0
							ENSG00000151690	MFSD6	2	191273081	191373931	2				1		1
							ENSG00000189362	TMEM194B	2	191369068	191399448	1		1
							ENSG00000138386	NAB1	2	191511472	191557492	2			1	1
							ENSG00000115419	GLS	2	191745553	191830278	4						1	1	1		1
							ENSG00000115415	STAT1	2	191829084	191885686	1							1
							ENSG00000138378	STAT4	2	191894302	192016322	2					1					1
Generalised epilepsy	3p22.3	Novel	rs9861238 (A:G)	0.41	-6.42	1.333e-10	ENSG00000144681	STAC	3	36421836	36589499	2					1					1
Generalised epilepsy	3p21.31	Novel	rs739431 (A:G)	0.84	6.23	4.822e-10	ENSG00000213672	NCKIPSD	3	48701364	48723797	3						1	1			1
							ENSG00000178252	WDR6	3	49044495	49053386	1							1
							ENSG00000172053	QARS	3	49133365	49142553	0
							ENSG00000185909	KLHDC8B	3	49209044	49213917	0
							ENSG00000233276	GPX1	3	49394609	49396033	1							1
							ENSG00000067560	RHOA	3	49396578	49450431	2							1			1
							ENSG00000145022	TCTA	3	49449639	49453908	0
							ENSG00000145020	AMT	3	49454211	49460186	3							1	1		1
							ENSG00000145029	NICN1	3	49460379	49466759	2						1				1
							ENSG00000164062	APEH	3	49711435	49721396	2							1			1
							ENSG00000176020	AMIGO3	3	49754267	49761349	0
							ENSG00000173540	GMPPB	3	49754277	49761384	1								1
							ENSG00000176095	IP6K1	3	49761727	49823975	2						1	1
							ENSG00000187492	CDHR4	3	49828165	49837268	0
							ENSG00000185614	FAM212A	3	49840687	49842463	0
							ENSG00000182179	UBA7	3	49842640	49851379	0
							ENSG00000183763	TRAIP	3	49866034	49894007	0
							ENSG00000164076	CAMKV	3	49895421	49907655	3						1	1			1
							ENSG00000164078	MST1R	3	49924435	49941299	0
							ENSG00000164077	MON1A	3	49946302	49967606	2						1				1
							ENSG00000004534	RBM6	3	49977440	50137478	1										1
							ENSG00000003756	RBM5	3	50126341	50156454	2		1								1
							ENSG00000001617	SEMA3F	3	50192478	50226508	3		1		1			1
							ENSG00000114349	GNAT1	3	50229045	50233949	1							1
							ENSG00000114353	GNAI2	3	50263724	50296787	4				1	1		1			1
							ENSG00000179564	LSMEM2	3	50316458	50325545	1				1
							ENSG00000214706	IFRD2	3	50325163	50330349	1				1
							ENSG00000186792	HYAL3	3	50330262	50336899	2						1				1
							ENSG00000243477	NAT6	3	50333833	50336852	1										1
							ENSG00000114378	HYAL1	3	50337320	50349812	0
							ENSG00000068001	HYAL2	3	50355221	50360337	1										1
							ENSG00000114383	TUSC2	3	50357458	50365682	2						1				1
							ENSG00000068028	RASSF1	3	50367219	50378411	3		1		1						1
							ENSG00000004838	ZMYND10	3	50378541	50384283	3				1			1			1
							ENSG00000114388	NPRL2	3	50384761	50388522	1								1
							ENSG00000114395	CYB561D2	3	50388126	50395891	1				1
							ENSG00000126062	TMEM115	3	50392180	50397041	1				1
							ENSG00000007402	CACNA2D2	3	50400233	50541675	6				1		1	1	1	1	1
							ENSG00000088543	C3orf18	3	50595462	50608458	1						1
							ENSG00000114735	HEMK1	3	50606583	50622366	0
							ENSG00000114737	CISH	3	50643921	50649262	0
							ENSG00000114738	MAPKAPK3	3	50648951	50686720	1										1
							ENSG00000088538	DOCK3	3	50712672	51421629	3						1	1			1
							ENSG00000145050	MANF	3	51422478	51426828	1							1
							ENSG00000179837	RBM15B	3	51428731	51435330	0
							ENSG00000164080	RAD54L2	3	51575160	51702683	1							1
							ENSG00000114779	ABHD14B	3	52002526	52017425	0
							ENSG00000023330	ALAS1	3	52232102	52248343	1										1
							ENSG00000239732	TLR9	3	52255096	52273183	0
							ENSG00000247596	TWF2	3	52262626	52273276	1										1
							ENSG00000164088	PPM1M	3	52279841	52284613	1										1
Generalised epilepsy	4p15.1	Replication	rs1463849 (A:G)	0.59	-6.59	4.377e-11	ENSG00000169851	PCDH7	4	30722037	31148422	3				1	1					1
Generalised epilepsy	5q22.3	Replication	rs4596374 (T:C)	0.55	-6.98	2.906e-12	ENSG00000080709	KCNN2	5	113696642	113832337	6				1	1	1	1	1		1
							ENSG00000152503	TRIM36	5	114460459	114516243	1						1
							ENSG00000164219	PGGT1B	5	114546527	114598569	1		1
							ENSG00000164221	CCDC112	5	114602885	114632528	1						1
							ENSG00000134970	TMED7	5	114949205	114968689	0
Generalised epilepsy	5q31.2	Novel	rs2905552 (C:G)	0.48	-6.33	2.492e-10	ENSG00000113658	SMAD5	5	135468534	135524435	1							1
							ENSG00000152377	SPOCK1	5	136310987	136934068	5				1	1	1	1			1
							ENSG00000146021	KLHL3	5	136953189	137071779	2						1				1
Generalised epilepsy	6q22.33	Replication	rs13219424 (T:C)	0.29	-5.49	3.872e-08	ENSG00000093144	ECHDC1	6	127609855	127664754	0
							ENSG00000172673	THEMIS	6	128029217	128239776	2						1				1
							ENSG00000152894	PTPRK	6	128289924	128841870	3					1		1			1
Generalised epilepsy	9q21.32	Novel	rs2780103 (T:C)	0.26	-6.93	4.342e-12	ENSG00000172159	FRMD3	9	85857905	86153461	1							1
							ENSG00000148057	IDNK	9	86237964	86259045	2						1	1
							ENSG00000135018	UBQLN1	9	86274878	86323118	1							1
							ENSG00000165113	GKAP1	9	86354336	86444431	0
							ENSG00000165115	KIF27	9	86451613	86536342	4	1		1	1			1
							ENSG00000165118	C9orf64	9	86553226	86571901	3		1	1	1
							ENSG00000165119	HNRNPK	9	86582998	86595569	4		1		1	1			1
							ENSG00000178966	RMI1	9	86595626	86618985	5	1	1	1	1			1
							ENSG00000197506	SLC28A3	9	86890372	86955672	0
							ENSG00000135049	AGTPBP1	9	88161455	88356944	2						1	1
							ENSG00000135040	NAA35	9	88556061	88637213	0
Generalised epilepsy	10q24.32	Novel	rs11191156 (A:G)	0.67	-7.55	4.409e-14	ENSG00000186862	PDZD7	10	102767440	102790890	2						1	1
							ENSG00000107819	SFXN3	10	102790991	102800998	2						1				1
							ENSG00000107821	KAZALD1	10	102821598	102827888	0
							ENSG00000236311	TLX1NB	10	102849078	102890883	0
							ENSG00000107807	TLX1	10	102889257	102897545	1										1
							ENSG00000138136	LBX1	10	102986733	102989551	2						1	1
							ENSG00000166167	BTRC	10	103113820	103317078	2						1				1
							ENSG00000166171	DPCD	10	103330317	103369425	2							1			1
							ENSG00000166169	POLL	10	103338639	103348027	1										1
							ENSG00000107829	FBXW4	10	103370423	103455052	1						1
							ENSG00000107831	FGF8	10	103529899	103535854	2						1	1
							ENSG00000107833	NPM3	10	103541082	103543170	2			1	1
							ENSG00000198408	MGEA5	10	103544200	103578696	2				1						1
							ENSG00000120049	KCNIP2	10	103585731	103603677	4				1	1	1				1
							ENSG00000120029	C10orf76	10	103605356	103815950	1				1
							ENSG00000166189	HPS6	10	103825147	103827792	2		1					1
							ENSG00000198728	LDB1	10	103867317	103880210	1							1
							ENSG00000148840	PPRC1	10	103892787	103910082	0
							ENSG00000166197	NOLC1	10	103911933	103923627	1							1
							ENSG00000119915	ELOVL3	10	103986085	103989346	0
							ENSG00000107859	PITX3	10	103989943	104001231	2							1			1
							ENSG00000107862	GBF1	10	104005289	104142656	0
							ENSG00000059915	PSD	10	104162376	104181296	2						1				1
							ENSG00000107872	FBXL15	10	104178946	104182893	2						1				1
							ENSG00000107874	CUEDC2	10	104183002	104192418	0
							ENSG00000138111	TMEM180	10	104221149	104236802	0
							ENSG00000138107	ACTR1A	10	104238986	104262482	0
							ENSG00000107882	SUFU	10	104263744	104393292	1							1
							ENSG00000166275	C10orf32	10	104613980	104624718	0
							ENSG00000214435	AS3MT	10	104629273	104661656	0
Generalised epilepsy	12q13.13	Novel	rs114131287 (A:T)	0.02	5.83	5.457e-09	ENSG00000135457	TFCP2	12	51487446	51566926	0
							ENSG00000139629	GALNT6	12	51745031	51786651	0
							ENSG00000050438	SLC4A8	12	51785101	51902980	1						1
							ENSG00000196876	SCN8A	12	51984050	52206648	6					1	1	1	1	1	1
							ENSG00000167612	ANKRD33	12	52281744	52285448	0
							ENSG00000139567	ACVRL1	12	52300692	52317145	2							1			1
							ENSG00000135503	ACVR1B	12	52345451	52390862	1										1
							ENSG00000161835	GRASP	12	52400724	52409673	1										1
							ENSG00000123358	NR4A1	12	52416616	52453291	0
							ENSG00000123395	C12orf44	12	52463030	52471278	1						1
							ENSG00000167767	KRT80	12	52562780	52585784	1							1
Generalised epilepsy	16p13.3	Novel	rs62014006 (T:G)	0.05	5.88	4.223e-09	ENSG00000078328	RBFOX1	16	6069095	7763340	5				1	1	1	1			1
Generalised epilepsy	17p13.1	Novel	rs2585398 (A:C)	0.53	-6.37	1.842e-10	ENSG00000175826	CTDNEP1	17	7146910	7155810	0
							ENSG00000181856	SLC2A4	17	7184986	7191576	1							1
							ENSG00000215041	NEURL4	17	7218947	7232712	2						1	1
							ENSG00000072818	ACAP1	17	7239848	7254797	0
							ENSG00000187838	TMEM256-PLSCR3	17	7293046	7307416	0
							ENSG00000262481	C17orf61-PLSCR3	17	7293053	7307416	1						1
							ENSG00000205544	TMEM256	17	7306294	7307456	1							1
							ENSG00000169992	NLGN2	17	7308193	7323179	3						1	1			1
							ENSG00000181284	TMEM102	17	7338762	7340998	0
							ENSG00000129245	FXR2	17	7494548	7518189	2						1	1
							ENSG00000129214	SHBG	17	7517382	7536700	0
							ENSG00000141510	TP53	17	7565097	7590856	2							1			1
							ENSG00000141499	WRAP53	17	7589389	7606820	0
							ENSG00000132510	KDM6B	17	7743222	7758114	1							1
							ENSG00000183011	LSMD1	17	7760003	7788556	0
							ENSG00000170004	CHD3	17	7788124	7816078	3							1	1		1
							ENSG00000170049	KCNAB3	17	7825177	7833121	2						1				1
							ENSG00000170043	TRAPPC1	17	7833663	7835441	0
							ENSG00000170037	CNTROB	17	7835419	7853236	0
							ENSG00000132518	GUCY2D	17	7905912	7923657	1							1
							ENSG00000179593	ALOX15B	17	7942335	7952452	1							1
							ENSG00000179477	ALOX12B	17	7975954	7991021	0
							ENSG00000214999	AC129492.6	17	7982800	7984883	0
							ENSG00000179148	ALOXE3	17	7999218	8022365	0
							ENSG00000179111	HES7	17	8023908	8027410	2			1			1
							ENSG00000179094	PER1	17	8043790	8059824	3				1	1		1
							ENSG00000263620	RP11-599B13.6	17	8054134	8066293	1				1
							ENSG00000220205	VAMP2	17	8062467	8066864	5				1		1	1	1		1
							ENSG00000179029	TMEM107	17	8076555	8079717	3		1		1			1
							ENSG00000196544	C17orf59	17	8091652	8093564	1						1
							ENSG00000178999	AURKB	17	8108056	8113918	1				1
							ENSG00000178971	CTC1	17	8130191	8151362	2				1			1
							ENSG00000178921	PFAS	17	8150936	8173809	1	1
							ENSG00000125434	SLC25A35	17	8191081	8198661	0
							ENSG00000108961	RANGRF	17	8191815	8193410	0
							ENSG00000198844	ARHGEF15	17	8213559	8225829	6	1	1	1	1			1			1
							ENSG00000184650	ODF4	17	8243182	8249364	0
							ENSG00000184619	KRBA2	17	8271955	8280029	0
							ENSG00000161970	RPL26	17	8280838	8286531	0
							ENSG00000189051	RNF222	17	8294022	8301144	1										1
							ENSG00000166579	NDEL1	17	8316449	8393729	2							1			1
							ENSG00000133026	MYH10	17	8377523	8534079	2							1			1
							ENSG00000161973	CCDC42	17	8633252	8648537	0
Generalised epilepsy	17q21.32	Replication	rs16955463 (T:G)	0.25	-5.97	2.3e-09	ENSG00000004142	POLDIP2	17	26673659	26684545	0
							ENSG00000141279	NPEPPS	17	45600308	45700642	1							1
							ENSG00000108424	KPNB1	17	45726842	45762871	1					1
							ENSG00000198933	TBKBP1	17	45771447	45789416	1						1
							ENSG00000073861	TBX21	17	45810610	45823485	1							1
							ENSG00000006025	OSBPL7	17	45884738	45899200	1				1
							ENSG00000159111	MRPL10	17	45900638	45908900	0
							ENSG00000141294	LRRC46	17	45908993	45915079	0
							ENSG00000141295	SCRN2	17	45915058	45918699	0
							ENSG00000189120	SP6	17	45922279	45933240	0
							ENSG00000167182	SP2	17	45973516	46006323	1							1
							ENSG00000108439	PNPO	17	46018872	46025654	2						1		1
							ENSG00000167183	PRR15L	17	46029333	46035244	1							1
							ENSG00000108465	CDK5RAP3	17	46045176	46059140	4		1	1	1			1
							ENSG00000005243	COPZ2	17	46103533	46115392	2				1						1
							ENSG00000082641	NFE2L1	17	46125691	46138849	0
							ENSG00000108468	CBX1	17	46147414	46178883	1						1
							ENSG00000002919	SNX11	17	46180719	46200436	2		1					1
							ENSG00000141293	SKAP1	17	46210802	46507637	1				1
							ENSG00000120094	HOXB1	17	46605888	46608359	1							1
							ENSG00000173917	HOXB2	17	46618256	46623441	1							1
							ENSG00000120093	HOXB3	17	46626232	46682274	1							1
							ENSG00000182742	HOXB4	17	46652875	46657473	0
							ENSG00000120075	HOXB5	17	46668619	46671323	1							1
							ENSG00000108511	HOXB6	17	46671639	46682354	1							1
							ENSG00000260027	HOXB7	17	46684594	46710934	0
							ENSG00000120068	HOXB8	17	46688739	46692478	1							1
							ENSG00000170689	HOXB9	17	46698518	46703839	0
							ENSG00000159182	PRAC1	17	46799084	46799884	0
							ENSG00000159184	HOXB13	17	46802125	46806540	1							1
							ENSG00000170703	TTLL6	17	46839597	46894576	0
							ENSG00000159199	ATP5G1	17	46970127	46973233	0
							ENSG00000159202	UBE2Z	17	46985731	47006418	0
							ENSG00000167080	B4GALNT2	17	47209822	47247351	1							1
							ENSG00000173868	PHOSPHO1	17	47300724	47308128	1							1
							ENSG00000121067	SPOP	17	47676246	47755596	1							1
Generalised epilepsy	19p13.3	Novel	rs75483641 (T:C)	0.14	-6.22	4.852e-10	ENSG00000181588	MEX3D	19	1554668	1568057	0
							ENSG00000267059	UQCR11	19	1578338	1605444	3							1	1	1
							ENSG00000071564	TCF3	19	1609291	1652604	1					1
							ENSG00000129911	KLF16	19	1852399	1863567	2						1				1
							ENSG00000129968	ABHD17A	19	1876809	1885546	1						1
							ENSG00000227500	SCAMP4	19	1905213	1926016	0
							ENSG00000213638	ADAT3	19	1905377	1913444	1								1
							ENSG00000133275	CSNK1G2	19	1941188	1981337	0
							ENSG00000133243	BTBD2	19	1985447	2034880	2						1	1
							ENSG00000099875	MKNK2	19	2037470	2051243	1										1
							ENSG00000172081	MOB3A	19	2071037	2096672	0
							ENSG00000099840	IZUMO4	19	2096380	2099592	0
							ENSG00000065000	AP3D1	19	2100988	2164464	5	1		1	1			1	1
							ENSG00000104885	DOT1L	19	2164148	2232577	2				1			1
							ENSG00000104886	PLEKHJ1	19	2230002	2237703	0
							ENSG00000104897	SF3A2	19	2236520	2248678	1										1
							ENSG00000104899	AMH	19	2249308	2252072	1						1
							ENSG00000167476	JSRP1	19	2252251	2269758	1							1
							ENSG00000104904	OAZ1	19	2269485	2273487	1										1
							ENSG00000188305	C19orf35	19	2274631	2282181	0
							ENSG00000220008	LINGO3	19	2289774	2308156	2						1				1
							ENSG00000130332	LSM7	19	2321516	2328619	0
							ENSG00000176619	LMNB2	19	2427636	2456994	3							1	1		1
							ENSG00000176533	GNG7	19	2511217	2702707	3						1	1			1
							ENSG00000141873	SLC39A3	19	2732202	2740150	1										1
							ENSG00000172006	ZNF554	19	2819872	2835771	1						1
							ENSG00000186300	ZNF555	19	2841433	2860482	0
							ENSG00000175691	ZNF77	19	2933216	2944969	0
							ENSG00000088256	GNA11	19	3094408	3124002	1							1
Generalised epilepsy	21q22.1	Replication	rs7277479 (A:G)	0.36	-6.82	8.935e-12	ENSG00000171189	GRIK1	21	30909254	31312351	4						1	1		1	1
							ENSG00000240432	KRTAP13-3	21	31797583	31798286	0
							ENSG00000186971	KRTAP13-4	21	31802572	31803216	0
							ENSG00000186970	KRTAP15-1	21	31812597	31813070	0
							ENSG00000184351	KRTAP19-1	21	31852018	31852663	0
							ENSG00000186965	KRTAP19-2	21	31859362	31859755	0
							ENSG00000244025	KRTAP19-3	21	31863782	31864275	0
							ENSG00000186967	KRTAP19-4	21	31869142	31869451	0
							ENSG00000186977	KRTAP19-5	21	31873975	31874435	0
							ENSG00000186925	KRTAP19-6	21	31913854	31914183	0
							ENSG00000244362	KRTAP19-7	21	31933194	31933633	0
							ENSG00000206106	KRTAP22-2	21	31962424	31962716	0
							ENSG00000212938	KRTAP6-3	21	31964759	31965394	0
							ENSG00000186930	KRTAP6-2	21	31970909	31971219	0
							ENSG00000186924	KRTAP22-1	21	31973414	31973612	0
							ENSG00000184724	KRTAP6-1	21	31985750	31986249	0
							ENSG00000244624	KRTAP20-1	21	31988750	31989003	0
							ENSG00000206105	KRTAP20-4	21	31992946	31993169	0
							ENSG00000184032	KRTAP20-2	21	32007555	32007938	0
							ENSG00000206104	KRTAP20-3	21	32015183	32015455	0
							ENSG00000231068	KRTAP21-3	21	32090843	32091095	0
							ENSG00000187026	KRTAP21-2	21	32119112	32119551	0
							ENSG00000187005	KRTAP21-1	21	32127439	32127746	0
							ENSG00000183640	KRTAP8-1	21	32185016	32185570	3				1	1		1
							ENSG00000182591	KRTAP11-1	21	32252966	32253874	0
							ENSG00000206102	KRTAP19-8	21	32410478	32410795	0
Generalised epilepsy	22q13.32	Novel	rs469999 (A:G)	0.31	-6.32	2.647e-10	ENSG00000219438	FAM19A5	22	48885272	49246724	2					1	1
							Locus with no mapped genes within 250kb, eQTL or HiC; chosen genes within 500kb
Generalised epilepsy	7p14.1	Novel	rs37276 (T:G)	0.26	-5.69	1.288e-08	ENSG00000175600	SUGCT	7	40174604	40900362	2		1			1
							ENSG00000122641	INHBA	7	41724712	41742688	1							1
							Locus with no mapped genes within 500, eQTL or HiC; chosen genes within 2000kb
Generalised epilepsy	21q21.1	Novel	rs1487946 (A:G)	0.59	5.47	4.409e-08	ENSG00000154646	TMPRSS15	21	19641433	19776102	1					1

## Sheet: CAE
Supplementary Data 7. Scores of biological prioritization criteria for each mapped gene, of each genome-wide significant locus
Phenotype: epilepsy phenotype Locus: genomic locus Novel/replication Lead SNP (A1:A2): rsID of the lead SNP in the locus Freq1: frequency of Allele 1 (A1) Z-score: Z-score of the GWAS association test P-value: P-value of the GWAS association test Ensembl_geneid: Ensembl gene ID Gene: Gene name chr: chromosome start: start position of the gene on the chromosome end: end position of the gene on the…
Phenotype	Locus	Novel/replication	Lead SNP (A1:A2)	Freq1	Z-score	P-value	Ensembl_geneid	Gene	chr	start	end	Total	Missense	TWAS	SMR	MAGMA	PoPS	Brain expression	Knockout mouse	Monogenic epilepsy gene	Target of AED	brain-coX
Generalised epilepsy	2p16.1	Replication	rs12185644 (A:C)	0.7	-7.12	1.04e-12	ENSG00000028116	VRK2	2	58134786	58387055	2	1			1								Missense: based on FUMA exonic and SNPdb missense variance status
							ENSG00000115392	FANCL	2	58386378	58468507	2		1		1								TWAS: based on FUSION PEC TWAS for 2 genes with expression information; significance at p<0.05/2=0.025
							ENSG00000119866	BCL11A	2	60678302	60780702	5					1	1	1	1		1		SMR: based on MetaBrain; none of these CAE genes had expression information.
																								MAGMA: gene-based MAGMA; significance at p<0.05/3 genes=0.016
																								PoPS: highest Polygenic Priority Score (PoPS) score in the locus.
																								Brain expression: calculated mean TPM for brain and non-brain tissues based on GTEx v8 data and assessed if average brain tissue expression was higher than non-brain tissues. GTEx_Analysis_2017-06-05_v8_RNASeQCv1.1.9_gene_median_tpm.gct.gz
																								Monogenic epilepsy gene: the gene is listed in a curated list of monogenic epilepsy genes.
																								Knockout mouse: HMD_HumanPhenotype.rpt containing the terms MP:0003631 or MP:0005386
																								brain-coX: prioritised as co-expressed with established epilepsy genes in >1/3 of resources tested

## Sheet: JME
Supplementary Data 7. Scores of biological prioritization criteria for each mapped gene, of each genome-wide significant locus
Phenotype: epilepsy phenotype Locus: genomic locus Novel/replication Lead SNP (A1:A2): rsID of the lead SNP in the locus Freq1: frequency of Allele 1 (A1) Z-score: Z-score of the GWAS association test P-value: P-value of the GWAS association test Ensembl_geneid: Ensembl gene ID Gene: Gene name chr: chromosome start: start position of the gene on the chromosome end: end position of the gene on the…
Phenotype	Locus	Novel/replication	Lead SNP (A1:A2)	Freq1	Z-score	P-value	Ensembl_geneid	Gene	chr	start	end	Total	Missense	TWAS	SMR	MAGMA	PoPS	Brain expression	Knockout mouse	Monogenic epilepsy gene	Target of AED	brain-coX
JME	4p12	Replication	rs17537141 (T:C)	0.851	-5.465	4.62e-08	ENSG00000177752	YIPF7	4	44624086	44680573	1						1							Missense: based on FUMA exonic and SNPdb missense variance status
							ENSG00000151806	GUF1	4	44680444	44702943	0													TWAS: based on FUSION PEC TWAS for 127 genes with expression information; significance at p<0.05/127=4e-4
							ENSG00000163281	GNPDA2	4	44684217	44728612	2						1	1						SMR: based on MetaBrain for 45 genes with expression information; significance at p<0.05/45=0.00111
							ENSG00000163285	GABRG1	4	46037786	46126098	5					1	1	1		1	1			MAGMA: gene-based MAGMA; significance at p<0.05/102 genes=4.90e-4
							ENSG00000151834	GABRA2	4	46250444	46477247	6				1		1	1	1	1	1			PoPS: highest Polygenic Priority Score (PoPS) score in the locus.
JME	8q23.1	Novel	rs3019359 (T:C)	0.414	-5.548	2.89e-08	ENSG00000147655	RSPO2	8	108911544	109095913	3					1	1				1			Brain expression: calculated mean TPM for brain and non-brain tissues based on GTEx v8 data and assessed if average brain tissue expression was higher than non-brain tissues. GTEx_Analysis_2017-06-05_v8_RNASeQCv1.1.9_gene_median_tpm.gct.gz
							ENSG00000104412	EMC2	8	109455830	109499145	0													Monogenic epilepsy gene: the gene is listed in a curated list of monogenic epilepsy genes.
							ENSG00000164841	TMEM74	8	109619079	109799844	3						1	1			1			Knockout mouse: HMD_HumanPhenotype.rpt containing the terms MP:0003631 or MP:0005386
							ENSG00000174417	TRHR	8	110098850	110131813	1							1						brain-coX: prioritised as co-expressed with established epilepsy genes in >1/3 of resources tested
							ENSG00000120526	NUDCD1	8	110253148	110346614	1										1
							ENSG00000120533	ENY2	8	110346553	110358182	0
							ENSG00000179526	SHARPIN	8	145153536	145163027	0
JME	16p11.2	Replication	rs1046276 (T:C)	0.353	6.189	6.05e-10	ENSG00000162366	PDZK1IP1	1	47649265	47656716	0
							ENSG00000168159	RNF187	1	228674762	228683467	1						1
							ENSG00000115234	SNX17	2	27593389	27599995	0
							ENSG00000071967	CYBRD1	2	172378757	172414643	1										1
							ENSG00000041880	PARP3	3	51976361	51982883	1										1
							ENSG00000175455	CCDC14	3	123616152	123680564	0
							ENSG00000164512	ANKRD55	5	55395507	55529186	1						1
							ENSG00000188175	HEPACAM2	7	92817899	92855837	0
							ENSG00000147408	CSGALNACT1	8	19261672	19615540	2							1			1
							ENSG00000005238	FAM214B	9	35104109	35116338	1										1
							ENSG00000173848	NET1	10	5454514	5500426	0
							ENSG00000166171	DPCD	10	103330317	103369425	1							1
							ENSG00000068971	PPP2R5B	11	64685025	64701945	2						1				1
							ENSG00000137731	FXYD2	11	117671559	117699413	0
							ENSG00000170486	KRT72	12	52979373	52995322	0
							ENSG00000186049	KRT73	12	53001354	53012343	0
							ENSG00000167768	KRT1	12	53068520	53074191	1							1
							ENSG00000034053	APBA2	15	29129629	29410518	3						1	1			1
							ENSG00000136379	ABHD17C	15	80972025	81047962	1						1
							ENSG00000176953	NFATC2IP	16	28962128	28978418	1							1
							ENSG00000103495	MAZ	16	29817427	29823649	1							1
							ENSG00000174943	KCTD13	16	29916333	29938356	3						1	1			1
							ENSG00000149930	TAOK2	16	29984962	30003582	1							1
							ENSG00000169592	INO80E	16	30006615	30017114	1							1
							ENSG00000149927	DOC2A	16	30016830	30034591	4				1		1	1			1
							ENSG00000167194	C16orf92	16	30034655	30039057	0
							ENSG00000149926	FAM57B	16	30035748	30064299	3				1		1				1
							ENSG00000149925	ALDOA	16	30064411	30081778	3				1	1		1
							ENSG00000149923	PPP4C	16	30087299	30096698	3		1		1			1
							ENSG00000149922	TBX6	16	30097114	30103208	1							1
							ENSG00000090238	YPEL3	16	30103635	30108236	4		1		1		1	1
							ENSG00000102882	MAPK3	16	30125426	30134827	3						1	1			1
							ENSG00000169217	CD2BP2	16	30362087	30366682	0
							ENSG00000180096	SEPT1	16	30389454	30407312	2								1	1
							ENSG00000270466	SEPT1	16	30389755	30393863	2								1	1
							ENSG00000179965	ZNF771	16	30418618	30440920	2						1				1
							ENSG00000179918	SEPHS2	16	30454952	30457502	0
							ENSG00000005844	ITGAL	16	30483979	30534506	0
							ENSG00000169951	ZNF764	16	30565085	30569819	0
							ENSG00000229809	ZNF688	16	30580667	30584055	0
							ENSG00000197162	ZNF785	16	30585061	30597092	0
							ENSG00000156853	ZNF689	16	30613879	30635333	1							1
							ENSG00000156858	PRR14	16	30662038	30667761	0
							ENSG00000156860	FBRS	16	30669752	30682135	0
							ENSG00000080603	SRCAP	16	30709530	30755602	2				1				1
							ENSG00000156873	PHKG2	16	30759591	30772490	0
							ENSG00000196118	C16orf93	16	30768744	30774031	0
							ENSG00000103549	RNF40	16	30773066	30787628	1		1
							ENSG00000102870	ZNF629	16	30789778	30798523	1							1
							ENSG00000099385	BCL7C	16	30844947	30906281	1				1
							ENSG00000150281	CTF1	16	30907928	30914881	2				1			1
							ENSG00000099364	FBXL19	16	30934376	30960104	3	1			1		1
							ENSG00000175938	ORAI3	16	30960387	30967782	0
							ENSG00000099381	SETD1A	16	30968615	30996437	1				1
							ENSG00000099377	HSD3B7	16	30996519	31000473	4	1	1	1	1
							ENSG00000099365	STX1B	16	31000577	31021949	5				1		1	1	1		1
							ENSG00000103496	STX4	16	31044210	31054296	3		1	1	1
							ENSG00000167394	ZNF668	16	31072164	31085641	3				1				1	1
							ENSG00000232748	ZNF668	16	31072813	31073451	2								1	1
							ENSG00000167395	ZNF646	16	31085743	31095517	3	1			1						1
							ENSG00000151006	PRSS53	16	31094746	31100949	4	1		1	1			1
							ENSG00000167397	VKORC1	16	31102163	31107301	3		1		1			1
							ENSG00000103507	BCKDK	16	31117428	31124110	1							1
							ENSG00000103510	KAT8	16	31127075	31142714	4		1		1			1	1
							ENSG00000052344	PRSS8	16	31142756	31147083	1							1
							ENSG00000178226	PRSS36	16	31150246	31161415	2		1								1
							ENSG00000089280	FUS	16	31191431	31203127	2				1			1
							ENSG00000103490	PYCARD	16	31212806	31214771	1										1
							ENSG00000261359	C16orf98	16	31213206	31214773	0
							ENSG00000177238	TRIM72	16	31225342	31236510	3		1				1	1
							ENSG00000169900	PYDC1	16	31227283	31228680	3		1				1				1
							ENSG00000169896	ITGAM	16	31271311	31344213	1							1
							ENSG00000140678	ITGAX	16	31366455	31394318	2			1	1
							ENSG00000156886	ITGAD	16	31404633	31437826	0
							ENSG00000156885	COX6A2	16	31439052	31439967	1										1
							ENSG00000176723	ZNF843	16	31445569	31454346	2						1				1
							ENSG00000140691	ARMC5	16	31469401	31478487	0
							ENSG00000140682	TGFB1I1	16	31482906	31489281	0
							ENSG00000140675	SLC5A2	16	31494323	31502181	2							1			1
							ENSG00000140688	C16orf58	16	31500792	31520630	0
							ENSG00000169877	AHSP	16	31539185	31540124	0
							ENSG00000197302	ZNF720	16	31724550	31806190	0
							ENSG00000185947	ZNF267	16	31885079	31928668	1							1
							ENSG00000129270	MMP28	17	34083268	34122711	1										1
							ENSG00000168646	AXIN2	17	63524681	63557765	1							1
							ENSG00000170558	CDH2	18	25530930	25757410	2						1	1
							ENSG00000095932	C19orf77	19	3474405	3480540	0
							ENSG00000267508	ZNF285	19	44886459	44905774	1						1
							ENSG00000138867	GUCD1	22	24936406	24951903	1										1
							ENSG00000100346	CACNA1I	22	39966758	40085742	5						1	1	1	1	1
