# Supplementary material for: GWAS meta-analysis of over 29,000 people with epilepsy identifies 26 risk loci and subtype-specific genetic architecture
Source: Nat Genet. 2023 Aug 31;55(9):1471–82. doi: 10.1038/s41588-023-01485-w (PMC10484785; doi:10.1038/s41588-023-01485-w)
Supplement: Supplementary file 11 — Median ranks and AUROCs of all drug groups. [file 41588_2023_1485_MOESM11_ESM.xlsx]

## Sheet: Sheet1
Supplementary Data 7. Median ranks and AUROCs of all drug groups
Disease	Median rank	AUROC mean	AUROC sd
epilepsy	111	0.735418	0.0339576
sleeplessness	225	0.698422	0.0878466
anxiety	361.5	0.67753	0.0890052
pain	404.5	0.56599	0.0461577
major depressive disorder	420	0.59399	0.0694599
pruritus	428	0.647155	0.0684337
urticaria	428	0.637681	0.0857791
b cell small lymphocytic lymphoma recurrent	430.5	0.283329	0.074209
symptomatic dermographism	463.5	0.62882	0.0974397
malaria	481	0.594535	0.0864398
schizophrenia	510	0.542275	0.0596433
rhinorrhea	549	0.492282	0.0512952
allergic conjunctivitis	565.5	0.484907	0.0488726
depressive disorder	569.5	0.587709	0.0730488
nasal congestion finding	576	0.46696	0.0537537
rhinitis	580	0.456691	0.0589134
sneezing	580	0.485476	0.0700993
obesity	597	0.581314	0.0836846
allergic rhinitis disorder	637	0.457512	0.0417844
hay fever	649	0.458637	0.0619235
common cold	661	0.410105	0.0607143
contact dermatitis	678	0.458333	0.0929192
lichen simplex chronicus	678	0.46591	0.0891118
pruritusani	678	0.451599	0.095672
seborrheic dermatitis	678	0.480388	0.0844203
chronic small plaque psoriasis	684	0.460429	0.09109
exanthema	684	0.45219	0.0943425
granuloma annulare	684	0.453962	0.0930704
pruritus of genital organs	684	0.484549	0.0855977
scalp psoriasis	684.5	0.452836	0.0932099
lupus erythematosus	699	0.468787	0.0728363
degenerative polyarthritis	706.5	0.47812	0.0620654
infective otitis media	724	0.449564	0.0689413
meningitis	724	0.458719	0.0737928
pharyngitis	740	0.448609	0.0812379
peptic ulcer	764	0.465	0.0905184
lupus nephritis	766	0.522297	0.102928
infection of skin and/or subcutaneous tissue	767.5	0.394426	0.0480573
recurrent adult acute myeloid leukemia	790.5	0.424867	0.0756588
secondary acute myeloid leukemia	790.5	0.433765	0.0768633
bacterial sepsis	795	0.64225	0.0823299
staphylococcal pneumonia	795	0.356789	0.0708757
staphylococcus aureus infection	795	0.411955	0.0522646
lymphoma	818.5	0.41116	0.0512555
adult acute myeloid leukemia with inv16p13q22	819	0.425618	0.0760175
adult acute myeloid leukemia witht 1616p13q22	819	0.424271	0.0793942
adult acute myeloid leukemia witht 821q22q22	819	0.428569	0.078337
hodgkin disease	819	0.442596	0.0707378
malignant tumor of colon	829	0.451277	0.0634654
unspecified adult solid tumor	829	0.412155	0.0601512
diabetes mellitus	835	0.439125	0.0730001
hyperlipidemia	844	0.507236	0.0647404
rheumatoid arthritis	844.5	0.409718	0.0470669
multiple sclerosis	850	0.33588	0.0839086
psoriasis	850	0.38632	0.0892011
lower respiratory tract infection	858	0.322096	0.0695287
tuberculosis	866.5	0.359867	0.0974703
tinea corporis disorder	867.5	0.293143	0.0861951
parkinson disease	871.5	0.352492	0.0720916
pneumonia due to escherichia coli	871.5	0.332264	0.0913788
tinea pedis	881	0.294796	0.0857602
acne vulgaris	885	0.442318	0.069367
neuroblastoma	885	0.42687	0.071579
adult acute myeloid leukemia with 11q23mll abnormalities	891.5	0.417582	0.0739005
escherichia coli urinary tract infection	901	0.319642	0.0666258
klebsiella cystitis	901	0.31425	0.0725755
malignant neoplasm of stomach	901	0.379979	0.10363
streptococcal pneumonia	901	0.431051	0.0693526
asthma	903.5	0.381603	0.0649226
crohn disease	903.5	0.308979	0.0966835
intraabdominal infections	906	0.371037	0.0669847
pneumonia	911.5	0.39182	0.045421
hypertensive disease	941	0.333877	0.0339399
osteoporosis	942	0.352222	0.146179
escherichia coli infections	948	0.330041	0.099754
infection of bone	948	0.383986	0.0698804
chronic heart failure	948.5	0.301004	0.0775262
leukemia	951	0.421052	0.0449917
arthritis	957	0.31468	0.0885663
hiv infections	960	0.317283	0.0675256
arthropathy associated with infection	962	0.387714	0.0767334
glaucoma	962.5	0.346414	0.06098
acute gonococcal cervicitis	976	0.389187	0.0707593
acute gonococcal urethritis	976	0.388862	0.0708311
bacterial infection due to klebsiella pneumoniae	976	0.4006	0.0765582
gonorrhea	976	0.403923	0.088451
gonorrhea of rectum	976	0.356112	0.0845661
rhinoscleroma	976	0.29043	0.0976037
streptococcus pyogenes infection	976	0.408318	0.057902
urinary tract infection	976	0.333814	0.0625772
non-small cell lung cancer recurrent	987.5	0.336646	0.0962028
malignant neoplasm of lung	988	0.347694	0.0516784
non-small cell lung cancer metastatic	989	0.365296	0.0840963
solid tumour	989	0.37842	0.0831799
non-small cell lung carcinoma	995	0.280574	0.0826436
colon cancer recurrent	1001	0.335143	0.12528
recurrent rectal cancer	1001	0.328327	0.123723
multiple myeloma	1006	0.409091	0.0573573
acute exacerbation of chronic bronchitis	1008	0.311671	0.0735603
bronchitis	1017	0.332194	0.0697541
ovarian neoplasm	1030	0.31692	0.159635
escherichia coli septicemia	1052	0.26389	0.0927619
secondary malignant neoplasm of liver	1058	0.22475	0.16531
proteus urinary tract infection	1068	0.266887	0.0705134
hepatitis c	1071.5	0.305812	0.161853
haemophilus influenza epneumonia	1094	0.308019	0.0614348
\	1186	0.308679	0.0796814
